# Supplementary material for: Screening of Candidate Effectors from Magnaporthe oryzae by In Vitro Secretomic Analysis
Source: MDPI journal article supplement (doi:10.3390/ijms24043189), 2023-02-06
Supplement: s1 [file s1]

**Table S4. Primers used in this study.**

| Uniprot No.                                         | Gene name | Primer name     | Primer Sequence (5'-3')                                                       |
|-----------------------------------------------------|-----------|-----------------|-------------------------------------------------------------------------------|
| <b>Construction for transient expression vector</b> |           |                 |                                                                               |
| G4NG69                                              | MGG_14966 | MGG_14966-F     | GCTCTAGAATGTACCCATACGATGTTCCAGATTACGCTGGCATGAAGTACACCACTTTTCGCTGC             |
|                                                     |           | MGG_14966-R     | CGAGCTCTTAAGAGCAGGTGCCGAA                                                     |
|                                                     |           | NSP-MGG-14966-F | GCTCTAGAATGTACCCATACGATGTTCCAGATTACGCTATGATTCCCTCTGCTCTGGCC                   |
|                                                     |           | NSP-MGG-14966-R | CGAGCTCTTAAGAGCAGGTGCCGAATGC                                                  |
| G4NIH0                                              | MGG_09842 | MGG_09842-F     | GAGAACACGGGGGACTCTAGAATGTACCCATACGATGTTCCAGATTACGCTGGC ATGCAGTTTCTCAGCACCATGC |
|                                                     |           | MGG_09842-R     | CGATCGGGGAAATTCGAGCTCTTACCAGTCCCAGCACTGGTAGC                                  |
|                                                     |           | NSP-MGG-09842-F | GAGAACACGGGGGACTCTAGAATGTACCCATACGATGTTCCAGATTACGCTGGC ATCCCGGCCGAGCTC        |
|                                                     |           | NSP-MGG-09842-R | CGATCGGGGAAATTCGAGCTCTTACCAGTCCCAGCACTGGTAGC                                  |
| G4MVY9                                              | MGG_15924 | MGG_15924-F     | GCTCTAGAATGTACCCATACGATGTTCCAGATTACGCTGGCATGCGCACATTTGCTATTCTC                |
|                                                     |           | MGG_15924-R     | CGAGCTCTTAGACGCATCCAATAAATCCCTT                                               |
|                                                     |           | NSP-MGG-15924-F | GCTCTAGAATGTACCCATACGATGTTCCAGATTACGCTATGTGGCCTGGTTGCCGC                      |
|                                                     |           | NSP-MGG-15924-R | CGAGCTCTTAGACGCATCCAATAAATCCCT                                                |
| G4NAI7                                              | MGG_13654 | MGG_13654-F     | GAGAACACGGGGGACTCTAGAATGTACCCATACGATGTTCCAGATTACGCTGGCATGAAGTTCCTCGGCCTCACC   |
|                                                     |           | MGG_13654-R     | CGATCGGGGAAATTCGAGCTCCTAGGTGCAGTTGGTGCAAGTG                                   |
|                                                     |           | NSP-MGG-13654-F | GAGAACACGGGGGACTCTAGAATGTACCCATACGATGTTCCAGATTACGCTATGTCCCGCTGGCCATGG         |
|                                                     |           | NSP-MGG-13654-R | CGATCGGGGAAATTCGAGCTCCTAGGTGCAGTTGGTGCAAGTG                                   |
| Q2KEU7                                              | MGG_09134 | MGG_09134-F     | GCTCTAGAATGTACCCATACGATGTTCCAGATTACGCTATGCAGATCAAGGCCCTCA                     |
|                                                     |           | MGG_09134-R     | CGAGCTCTTAATGGCCGATGGGTGC                                                     |
|                                                     |           | NSP-MGG_09134-F | GCTCTAGAATGTACCCATACGATGTTCCAGATTACGCTGGCATGCCCACCGACCCG                      |
|                                                     |           | NSP-MGG_09134-R | CGAGCTCTTAATGGCCGATGGGTGC                                                     |
| G4NFX3                                              | MGG_11072 | MGG_11072-F     | GCTCTAGAATGTACCCATACGATGTTCCAGATTACGCTATGCAGATCAAGACTTTTCGC                   |

|        |           |                 |                                                                           |
|--------|-----------|-----------------|---------------------------------------------------------------------------|
|        |           | MGG_11072-R     | CGAGCTC TTAGTAGGTGCAAGTGCACTCG                                            |
|        |           | NSP-MGG_11072-F | GCTCTAGAATGTACCCATACGATGTTCCAGATTACGCTGGCCTCTTCATCGCCTTCGCTG              |
|        |           | NSP-MGG_11072-R | CGAGCTCTTAGTAGGTGCAAGTGCACTCG                                             |
| G4MWC0 | MGG_08373 | MGG_08373-F     | GCTCTAGAATGTACCCATACGATGTTCCAGATTACGCTATGCAGTTCTCAGCACTTCTCG              |
|        |           | MGG_08373-R     | CGAGCTCCTAAGCACTAATTGAGCGGCG                                              |
|        |           | NSP-MGG_08373-F | GCTCTAGAATGTACCCATACGATGTTCCAGATTACGCTGGCGTGTCGGCCATCGATGTCA              |
|        |           | NSP-MGG_08373-R | CGAGCTCCTAAGCACTAATTGAGCGGCG                                              |
| G4NJJ0 | MGG_02638 | MGG_02638-F     | GCTCTAGAATGTACCCATACGATGTTCCAGATTACGCTATGCTGCTCAACCACACCAA                |
|        |           | MGG_02638-R     | CGAGCTCTCATCCACACAGCCCCGT                                                 |
|        |           | NSP-MGG_02638-F | GCTCTAGAATGTACCCATACGATGTTCCAGATTACGCTGGCGGCAAAATCGAGGGCAATC              |
|        |           | NSP-MGG_02638-R | CGAGCTCTCATCCACACAGCCCCGT                                                 |
| G4N4K5 | MGG_05982 | MGG_05982-F     | GCTCTAGAATGTACCCATACGATGTTCCAGATTACGCTGGCATGAAGCTTTTCACTATAATTATGG        |
|        |           | MGG_05982-R     | CGAGCTCTTACCGGACACGGTAGCACTT                                              |
|        |           | NSP-MGG_05982-F | GCTCTAGAATGTACCCATACGATGTTCCAGATTACGCTGGCGCACCGGTCGAGAGCACAA              |
|        |           | NSP-MGG_05982-R | CGAGCTCTTACCGGACACGGTAGCACTT                                              |
| G4MPP1 | MGG_02234 | MGG_02234-F     | GCTCTAGAATGTACCCATACGATGTTCCAGATTACGCTGGCATGCACTTCCCCACCATCCTC            |
|        |           | MGG_02234-R     | CGAGCTCCTATTTCCTCGGAGCTGCG                                                |
|        |           | NSP-MGG_02234-F | GCTCTAGAATGTACCCATACGATGTTCCAGATTACGC GGCTCAACGTCCGTTTCGCAC               |
|        |           | NSP-MGG_02234-R | CGAGCTCCTATTTCCTCGGAGCTGCG                                                |
| G4N4A2 | MGG_05943 | MGG_05943-F     | GAGAACACGGGGGACTCTAGAATGTACCCATACGATGTTCCAGATTACGCTGGCATGCAGCTACCAAGGTCTT |
|        |           | MGG_05943-R     | CGATCGGGGAAATTCGAGCTCTCAGCTGCAGTTGAAAGGG                                  |
|        |           | NSP-MGG_05943-F | CGATCGGGGAAATTCGAGCTCATGTACCCATACGATGTTCCAGATTACGCTGGCGCCTTTGTGATCCCCGC   |
|        |           | NSP-MGG_05943-R | CGATCGGGGAAATTCGAGCTCTCAGCTGCAGTTGAAAGGG                                  |
| G4NDA8 | MGG_00269 | MGG_00269-F     | GCTCTAGAATGTACCCATACGATGTTCCAGATTACGCTGGCATGCTTTCACTCTCCATCGTCAC          |
|        |           | MGG_00269-R     | CGAGCTCCTAGCTGGGGATACACATGAAGGA                                           |
|        |           | NSP-MGG_00269-F | GCTCTAGAATGTACCCATACGATGTTCCAGATTACGCTGGCGCCCCGGCGGAGGTCA                 |

|        |              |                    |                                                                                |
|--------|--------------|--------------------|--------------------------------------------------------------------------------|
| Q2KHE0 | MGCH7_ch7g45 | NSP-MGG_00269-R    | CGAGCTCCTAGCTGGGGATACACATGAAGGA                                                |
|        |              | MGCH7_ch7g45-F     | GCTCTAGAAATGTACCCATACGATGTTCCAGATTACGCTGGCATGCATTTCCCCTCCGTCTTAGC              |
|        |              | MGCH7_ch7g45-R     | CGAGCTCCTAGGGGTTGGTAGCGTTTGGG                                                  |
|        |              | NSP-MGCH7_ch7g45-F | GCTCTAGAAATGTACCCATACGATGTTCCAGATTACGCTGGCGCGCCAATGCTATCCGAG                   |
| G4N7U6 | MGG_06359    | NSP-MGCH7_ch7g45-R | CGAGCTCCTAGGGGTTGGTAGCGTTTGG                                                   |
|        |              | MGG_06359 -F       | GAGAACACGGGGGACTCTAGAAATGTACCCATACGATGTTCCAGATTACGCTGGCATGCGCGCACCCACAG        |
|        |              | MGG_06359 -R       | CGATCGGGGAAATTCGAGCTCTCAAGTCTTGATGGTCAGCTTCATA                                 |
|        |              | NSP-MGG_06359 -F   | GAGAACACGGGGGACTCTAGAAATGTACCCATACGATGTTCCAGATTACGCTGGCGCACCCCTCGAGGAACATATACG |
| G4N8U1 | MGG_10105    | NSP-MGG_06359 -R   | CGATCGGGGAAATTCGAGCTCTCAAGTCTTGATGGTCAGCTTCATA                                 |
|        |              | MGG_10105-F        | GCTCTAGAAATGTACCCATACGATGTTCCAGATTACGCTGGCATGCAGATCAAGACCCTCATCG               |
|        |              | MGG_10105-R        | CGAGCTCTTAGGCTCCGACTGGGGC                                                      |
|        |              | NSP-MGG_10105-F    | GCTCTAGAAATGTACCCATACGATGTTCCAGATTACGCTGGCATGCCCACCGACCCGC                     |
| G4MMD6 | MGG_01993    | NSP-MGG_10105-R    | CGAGCTCTTAGGCTCCGACTGGGGC                                                      |
|        |              | MGG_01993-F        | GCTCTAGAAATGTACCCATACGATGTTCCAGATTACGCTGGCATGAAGTTCACCCTTCCCATCA               |
|        |              | MGG_01993-R        | CGAGCTCTCAAGTGGCACAGCACTTGTAG                                                  |
|        |              | NSP-MGG_01993-F    | GCTCTAGAAATGTACCCATACGATGTTCCAGATTACGCTGGCGCCATTGGGGACCTCTGC                   |
| G4MKE6 | MGG_10531    | NSP-MGG_01993-R    | CGAGCTCTCAAGTGGCACAGCACTTGTAG                                                  |
|        |              | MGG_10531-F        | GCTCTAGAAATG TACCCATACGATGTTCCAGATTACGCTGGCATGCAGCTCATCATCTTCCTCA              |
|        |              | MGG_10531-R        | CGAGCTCTTACTCCTGGTCGAGAAGTGC                                                   |
|        |              | NSP-MGG_10531-F    | GCTCTAGAAATGTACCCATACGATGTTCCAGATTACGCTGGCGCCGACGTCTGCGGC                      |
| G5EH55 | MGCH7_ch7g5  | NSP-MGG_10531-R    | CGAGCTCTTACTCCTGGTCGAGAAGTGC                                                   |
|        |              | MGCH7_ch7g5-F      | GCTCTAGAAATGTACCCATACGATGTTCCAGATTACGCTGGCATGCTCCCAGGTAACCTTTTTA               |
|        |              | MGCH7_ch7g5-R      | CGAGCTCTTAACGTGGTCCGTAATGGTAG                                                  |
|        |              | NSP-MGCH7_ch7g5-F  | GCTCTAGAAATGTACCCATACGATGTTCCAGATTACGCTGGCATGCCCCCTTCTCACAAAC                  |
|        |              | NSP-MGCH7_ch7g5-R  | CGAGCTCTTAACGTGGTCCGTAATGGTAG                                                  |

**qRT-PCR analysis of *M. oryzae* candidate effector genes**

|           |             |                 |                         |
|-----------|-------------|-----------------|-------------------------|
| G4NGZ4    | MGG_03982   | qMoActin-F      | TCGACGTCCGAAAGGATCTGT   |
| (MoActin) |             | qMoActin-R      | ACTCCTGCTTCGAGATCCACATC |
| G4NIH02   | MGG_09842   | qMGG_09842-F    | CGTCTACCTGTGCACCAACT    |
|           |             | qMGG_09842-R    | TGGTCAGGTCAAAGTGCCAG    |
| G4MVY9    | MGG_15924   | qMGG_15924-F    | GCATCCGACCCACTTGATGA    |
|           |             | qMGG_15924-R    | ACCTGTTGAACTACGCGTCC    |
| G4NAI7    | MGG_13654   | qMGG_13654-F    | TACGTCCGGAACATTGGCTC    |
|           |             | qMGG_13654-R    | GCAGTTGGTGCAAGTGACA     |
| Q2KEU75   | MGG_09134   | qMGG_09134-F    | ACTGACATCCTCGGTCTTGC    |
|           |             | qMGG_09134-R    | GCAGAGAAGTGCCTGTCCAA    |
| G4NFX3    | MGG_11072   | qMGG_11072-F    | GAGACCTCCACCTTCAGGGA    |
|           |             | qMGG_11072-R    | TGATGTCGTTGGACTTGGGG    |
| G4MWC0    | MGG_08373   | qMGG_08373-F    | ACCTCAACCCCAACGTATGC    |
|           |             | qMGG_08373-R    | AAGTCTCTGCCGTTGGAGTC    |
| G4NJJ0    | MGG_02638   | qMGG_02638-F    | CCGACTTGCTGCACAACCTT    |
|           |             | qMGG_02638-R    | CCACTTGCTCTCAACGCAAC    |
| G4MPP1    | MGG_02234   | qMGG_02234-F    | ACATCGCCATCGCCTACAC     |
|           |             | qMGG_02234-R    | ACGAGTTGTACCAGCGTCC     |
| G4N4A2    | MGG_05943   | qMGG_05943-F    | AAGTATGGCCAGCCTCTGGG    |
|           |             | qMGG_05943-R    | AGTTGAAAGGGACCCGAGTG    |
| G4NDA8    | MGG_00269   | qMGG_00269-F    | GACTGGGCTTCTTTCTACGG    |
|           |             | qMGG_00269-R    | CGTTGCAGTTGTAGCGAACG    |
| Q2KHE0    | MGCH7_ch7g4 | qMGCH7_ch7g45-F | GACTAGCGCTAAAAACGGCG    |
|           | 5           | qMGCH7_ch7g45-R | CTGGTCCAGTTGATCCCGTC    |
| G4N7U6    | MGG_06359   | qMGG_06359-F    | AGGCAAATGATCAGCCCACA    |

|        |             |                |                       |
|--------|-------------|----------------|-----------------------|
| G4MMD6 | MGG_01993   | qMGG_06359-R   | CAAGGGCTCTCGTGGAAGTT  |
|        |             | qMGG_01993-F   | CCTTCTGTAGCAACCGTGGA  |
|        |             | qMGG_01993-R   | CCCCAGTGGACATACAAGACC |
| G4MKE6 | MGG_10531   | qMGG_10531-F   | CTCGCTGGTCAAGGTCCG    |
|        |             | qMGG_10531-R   | CTCCTGGTCGAGAAAGTGCAG |
| G5EH55 | MGCH7_ch7g5 | qMGCH7_ch7g5-F | GCCCCCTTCTCACAAACCTT  |
|        |             | qMGCH7_ch7g5-R | TAGAAGGTGGGTCGTCGCTA  |
| G4NG69 | MGG_14966   | qMGG_14966-F   | CATCACCCAGCAGTTGACCA  |
|        |             | qMGG_14966-R   | TGGCAGTACGGATCATGTGG  |
| G4N8U1 | MGG_10105   | qMGG_10105-F   | CATCGTCGCCCTCTTTGCC   |
|        |             | qMGG_10105-R   | CCTCGCACGCGTCATAGT    |
| G4N4K5 | MGG_05982   | qMGG_05982-F   | AAGAAGCGCTACGAGGTTCAA |
|        |             | qMGG_05982-R   | TCCTCACCGGGCCTTATGT   |

---
