# Supplementary material for: Screening of Candidate Effectors from Magnaporthe oryzae by In Vitro Secretomic Analysis
Source: Int J Mol Sci. 2023 Feb 6;24(4):3189. doi: 10.3390/ijms24043189 (PMC9962664; doi:10.3390/ijms24043189)
Supplement: Supplementary file 1 [file ijms-24-03189-s001.zip]

Archive with 5 entries (5 files):
- Li et al_Supplementary Table S1.xlsx
- Li et al_Supplementary Table S2.xlsx
- Li et al_Supplementary Table S4.pdf
- R1_Li et al_Figure S1-S7_20230201.pdf
- R1_Li et al_Supplementary Table S3.xlsx
