# Supplementary material for: Screening of Candidate Effectors from Magnaporthe oryzae by In Vitro Secretomic Analysis
Source: Int J Mol Sci. 2023 Feb 6;24(4):3189. doi: 10.3390/ijms24043189 (PMC9962664; doi:10.3390/ijms24043189)
Supplement: Supplementary file 1 [file ijms-24-03189-s001.zip › Li et al_Supplementary Table S1.xlsx]

## Sheet: Sheet1
Table S1. A summary list of M. oryzae secretome.
Uniprot Accession Number	Description	Coverage	# Proteins	# Unique Peptides	# Peptides	# PSMs	# AAs	SimilarityAA	MW [kDa]	calc. pI
G4MPL3	Vanadium chloroperoxidase OS=Magnaporthe oryzae (strain 70-15 / ATCC MYA-4617 / FGSC 8958) GN=MGG_02210 PE=4 SV=1 - [G4MPL3_MAGO7]	72.61	1	27	27	1203	595	595	65.3678	5.38916
G4N1Z8	Dipeptidyl-peptidase V OS=Magnaporthe oryzae (strain P131) GN=OOW_P131scaffold00655g13 PE=4 SV=1 - [L7J7V5_MAGOP]	30.22	1	18	18	116	718	718	78.5572	5.12256
G4N3F5	Laccase OS=Magnaporthe oryzae (strain 70-15 / ATCC MYA-4617 / FGSC 8958) GN=MGG_13464 PE=3 SV=1 - [G4N3F5_MAGO7]	46.8	1	25	25	1051	609	609	67.5095	6.97607
G4MKK2	Alpha-mannosidase OS=Magnaporthe oryzae (strain 70-15 / ATCC MYA-4617 / FGSC 8958) GN=MGG_04464 PE=3 SV=1 - [G4MKK2_MAGO7]	57.69	3	48	51	685	1073	1073	121.847	6.49365
G4MQ02	Aminopeptidase 2 OS=Magnaporthe oryzae (strain P131) GN=OOW_P131scaffold00089g3 PE=4 SV=1 - [L7JPS1_MAGOP]	69.08	2	53	53	596	883	883	98.5047	5.51611
A4QUT2	Catalase-peroxidase 2 OS=Magnaporthe oryzae (strain 70-15 / ATCC MYA-4617 / FGSC 8958) GN=KATG2 PE=1 SV=1 - [KATG2_MAGO7]	55.73	1	32	34	436	786	786	85.5335	5.87158
A4R5S9	Catalase-peroxidase 1 OS=Magnaporthe oryzae (strain 70-15 / ATCC MYA-4617 / FGSC 8958) GN=katG1 PE=1 SV=1 - [KATG1_MAGO7]	62.53	2	36	38	438	750	750	82.8076	6.21436
Q52FS9	Phosphatidylglycerol/phosphatidylinositol transfer protein OS=Magnaporthe oryzae (strain 70-15 / ATCC MYA-4617 / FGSC 8958) GN=NPC2 PE=3 SV=2 - [NPC2_MAGO7]	63.48	2	13	13	399	178	178	19.5432	5.30029
G4N2B8	Metallopeptidase MepB OS=Magnaporthe oryzae (strain 70-15 / ATCC MYA-4617 / FGSC 8958) GN=MGG_04858 PE=3 SV=1 - [G4N2B8_MAGO7]	54.55	1	37	37	380	781	781	87.7722	6.44287
G4MU87	Aspartyl aminopeptidase OS=Magnaporthe oryzae (strain P131) GN=OOW_P131scaffold01465g7 PE=3 SV=1 - [L7IUB9_MAGOP]	57.17	2	23	23	327	502	502	54.5443	5.98584
G4MLM8	Heat shock protein 90 OS=Magnaporthe oryzae (strain 70-15 / ATCC MYA-4617 / FGSC 8958) GN=MGG_06759 PE=3 SV=1 - [G4MLM8_MAGO7]	53.28	1	39	39	407	702	702	79.5278	4.98291
G4NAR5	Heat shock protein 60 OS=Magnaporthe oryzae (strain P131) GN=OOW_P131scaffold01199g16 PE=3 SV=1 - [L7J0T4_MAGOP]	70.97	1	33	33	358	589	589	61.8115	6.02393
G4ML75	5-methyltetrahydropteroyltriglutamate-homocysteine S-methyltransferase OS=Magnaporthe oryzae (strain 70-15 / ATCC MYA-4617 / FGSC 8958) GN=MGG_06712 PE=3 SV=1 - [G4ML75_MAGO7]	65.14	2	42	42	378	766	766	85.8585	6.44287
G4N5Y2	Peptide hydrolase OS=Magnaporthe oryzae (strain P131) GN=OOW_P131scaffold00626g5 PE=3 SV=1 - [L7J831_MAGOP]	65.92	1	21	21	229	493	493	52.5987	4.89404
G4N4X6	Ubiquitin-60S ribosomal protein L40 OS=Magnaporthe oryzae (strain 70-15 / ATCC MYA-4617 / FGSC 8958) GN=MGG_06044 PE=4 SV=1 - [G4N4X6_MAGO7]	50.78	5	1	7	304	128	128	14.5699	9.87646
G4N2G1	Poly-ubiquitin OS=Magnaporthe oryzae PE=2 SV=1 - [D4NXD9_MAGOR]	41.56	4	1	7	303	154	154	17.7255	9.77393
G4MYX0	Uncharacterized protein OS=Magnaporthe oryzae (strain 70-15 / ATCC MYA-4617 / FGSC 8958) GN=MGG_10827 PE=3 SV=1 - [G4MYX0_MAGO7]	71.56	1	6	6	177	109	109	11.0685	4.37354
G4NB11	Glucan 1,3-beta-glucosidase OS=Magnaporthe oryzae (strain 70-15 / ATCC MYA-4617 / FGSC 8958) GN=MGG_00659 PE=4 SV=1 - [G4NB11_MAGO7]	29.91	1	12	12	188	769	769	82.1202	5.69385
G4MY35	Trehalase OS=Magnaporthe oryzae (strain 70-15 / ATCC MYA-4617 / FGSC 8958) GN=MGG_01261 PE=3 SV=1 - [G4MY35_MAGO7]	40.11	5	21	21	413	698	698	78.4628	5.08447
G4NCF7	Glucoamylase OS=Magnaporthe oryzae (strain 70-15 / ATCC MYA-4617 / FGSC 8958) GN=MGG_01096 PE=3 SV=1 - [G4NCF7_MAGO7]	40.68	1	1	19	312	649	649	69.4218	6.01123
G4ML82	ATP-citrate synthase subunit 1 OS=Magnaporthe oryzae (strain 70-15 / ATCC MYA-4617 / FGSC 8958) GN=MGG_06719 PE=4 SV=1 - [G4ML82_MAGO7]	63.01	3	29	29	275	665	665	72.3946	8.30908
G4MPX2	Protein disulfide-isomerase OS=Magnaporthe oryzae (strain P131) GN=OOW_P131scaffold01338g22 PE=3 SV=1 - [L7IUJ2_MAGOP]	59.41	1	29	29	332	510	510	55.7613	4.98291
G4N4L1	Seprase OS=Magnaporthe oryzae (strain 70-15 / ATCC MYA-4617 / FGSC 8958) GN=MGG_05989 PE=3 SV=1 - [G4N4L1_MAGO7]	47.04	1	25	25	285	778	778	86.738	5.40186
G4MTW6	DNA damage checkpoint protein rad24 OS=Magnaporthe oryzae (strain P131) GN=OOW_P131scaffold00005g7 PE=3 SV=1 - [L7JQN3_MAGOP]	57.35	1	14	17	244	272	272	30.0752	4.98291
G4MTZ0	Calnexin OS=Magnaporthe oryzae (strain 70-15 / ATCC MYA-4617 / FGSC 8958) GN=MGG_01607 PE=3 SV=1 - [G4MTZ0_MAGO7]	54.07	1	29	29	309	577	577	63.8152	5.13525
G4MKA5	Hsp70 OS=Magnaporthe oryzae GN=KAR2 PE=3 SV=1 - [A7U5U5_MAGOR]	52.59	2	33	35	296	656	656	71.5018	5.22412
G4NAE0	ATP synthase subunit beta OS=Magnaporthe oryzae (strain 70-15 / ATCC MYA-4617 / FGSC 8958) GN=MGG_03185 PE=3 SV=1 - [G4NAE0_MAGO7]	72.37	1	25	25	249	514	514	55.0218	5.59229
G4NH99	Aldehyde dehydrogenase OS=Magnaporthe oryzae (strain 70-15 / ATCC MYA-4617 / FGSC 8958) GN=MGG_03900 PE=3 SV=1 - [G4NH99_MAGO7]	60.69	3	29	29	293	496	496	53.6374	6.11279
G4N9D5	Hydrolase OS=Magnaporthe oryzae (strain 70-15 / ATCC MYA-4617 / FGSC 8958) GN=MGG_13610 PE=4 SV=1 - [G4N9D5_MAGO7]	48.68	2	23	23	245	643	643	71.6995	5.89697
G4MNH8	Hsp70-like protein OS=Magnaporthe oryzae (strain 70-15 / ATCC MYA-4617 / FGSC 8958) GN=MGG_06958 PE=3 SV=1 - [G4MNH8_MAGO7]	58.83	1	30	33	345	651	651	70.717	5.13525
G4MNN9	3-ketosteroid-delta-1-dehydrogenase OS=Magnaporthe oryzae (strain 70-15 / ATCC MYA-4617 / FGSC 8958) GN=MGG_02098 PE=4 SV=1 - [G4MNN9_MAGO7]	61.71	1	30	30	259	572	572	62.1907	6.85889
G4MWH8	Uncharacterized protein OS=Magnaporthe oryzae (strain 70-15 / ATCC MYA-4617 / FGSC 8958) GN=MGG_08994 PE=4 SV=1 - [G4MWH8_MAGO7]	44.81	1	9	9	204	241	241	26.2244	5.64307
G4NDY5	6-phosphogluconate dehydrogenase, decarboxylating OS=Magnaporthe oryzae (strain 70-15 / ATCC MYA-4617 / FGSC 8958) GN=MGG_00175 PE=3 SV=1 - [G4NDY5_MAGO7]	64.43	2	27	27	265	492	492	54.2324	6.46826
G4N8X2	Uncharacterized protein OS=Magnaporthe oryzae (strain P131) GN=OOW_P131scaffold01377g14 PE=4 SV=1 - [L7ITH9_MAGOP]	48.56	2	7	7	152	208	208	21.8082	7.09326
G4N6Y6	Glucose-6-phosphate isomerase OS=Magnaporthe oryzae (strain 70-15 / ATCC MYA-4617 / FGSC 8958) GN=MGG_12822 PE=3 SV=1 - [G4N6Y6_MAGO7]	54.92	2	23	23	246	559	559	61.1588	6.30322
G4MQ03	Enolase OS=Magnaporthe oryzae (strain 70-15 / ATCC MYA-4617 / FGSC 8958) GN=MGG_10607 PE=3 SV=1 - [G4MQ03_MAGO7]	56.62	2	19	19	175	438	438	47.0771	5.32568
G4N7G5	Dihydrolipoyl dehydrogenase OS=Magnaporthe oryzae (strain 70-15 / ATCC MYA-4617 / FGSC 8958) GN=MGG_17072 PE=4 SV=1 - [G4N7G5_MAGO7]	63.98	2	27	27	247	508	508	54.118	7.38623
G4NJK6	Superoxide dismutase [Cu-Zn] OS=Magnaporthe oryzae (strain 70-15 / ATCC MYA-4617 / FGSC 8958) GN=MGG_02625 PE=3 SV=1 - [G4NJK6_MAGO7]	56.96	2	6	6	133	158	158	16.53	6.60986
G4N741	Fumarate reductase OS=Magnaporthe oryzae (strain 70-15 / ATCC MYA-4617 / FGSC 8958) GN=MGG_03619 PE=4 SV=1 - [G4N741_MAGO7]	66.56	1	31	31	269	619	619	66.8629	7.15186
G4N5R3	Alkaline phosphatase OS=Magnaporthe oryzae (strain 70-15 / ATCC MYA-4617 / FGSC 8958) GN=MGG_05299 PE=3 SV=1 - [G4N5R3_MAGO7]	43.44	1	19	19	181	587	587	63.4786	5.5415
G4N4W7	Uncharacterized protein OS=Magnaporthe oryzae (strain 70-15 / ATCC MYA-4617 / FGSC 8958) GN=MGG_16743 PE=4 SV=1 - [G4N4W7_MAGO7]	56.71	2	29	29	210	633	633	71.7968	5.52881
G4NET4	Uncharacterized protein OS=Magnaporthe oryzae (strain 70-15 / ATCC MYA-4617 / FGSC 8958) GN=MGG_00052 PE=4 SV=1 - [G4NET4_MAGO7]	45.54	1	7	7	167	224	224	23.9429	5.09717
G4N554	Hsp88-like protein OS=Magnaporthe oryzae (strain 70-15 / ATCC MYA-4617 / FGSC 8958) GN=MGG_06065 PE=3 SV=1 - [G4N554_MAGO7]	51.26	2	32	32	192	712	712	79.0087	5.12256
G4N7X7	Aconitate hydratase, mitochondrial OS=Magnaporthe oryzae (strain P131) GN=OOW_P131scaffold01276g17 PE=3 SV=1 - [L7IXG3_MAGOP]	42.73	1	27	28	230	784	784	85.02	7.03467
G4MVB0	Elongation factor 2 OS=Magnaporthe oryzae (strain 70-15 / ATCC MYA-4617 / FGSC 8958) GN=MGG_01742 PE=4 SV=1 - [G4MVB0_MAGO7]	60.43	1	44	44	263	844	844	93.6117	6.82959
G5EI15	Transaldolase OS=Magnaporthe oryzae (strain 70-15 / ATCC MYA-4617 / FGSC 8958) GN=MGCH7_ch7g347 PE=3 SV=1 - [G5EI15_MAGO7]	56.79	1	19	19	178	324	324	35.6356	5.5415
G4N226	Vacuolar aminopeptidase 1 OS=Magnaporthe oryzae (strain 70-15 / ATCC MYA-4617 / FGSC 8958) GN=MGG_07536 PE=4 SV=1 - [G4N226_MAGO7]	41.38	1	20	20	163	621	621	66.0105	6.94678
G4MSB2	Elongation factor 1-beta OS=Magnaporthe oryzae (strain 70-15 / ATCC MYA-4617 / FGSC 8958) GN=MGG_04436 PE=3 SV=1 - [G4MSB2_MAGO7]	42.36	1	8	8	106	229	229	25.1123	4.42432
G4MRV0	Zinc metalloprotease OS=Magnaporthe oryzae (strain 70-15 / ATCC MYA-4617 / FGSC 8958) GN=MGG_02442 PE=4 SV=1 - [G4MRV0_MAGO7]	37.51	3	33	33	171	1053	1053	117.576	5.021
Q2KEM0	Uncharacterized protein OS=Magnaporthe oryzae (strain 70-15 / ATCC MYA-4617 / FGSC 8958) GN=MGCH7_ch7g1016 PE=4 SV=1 - [Q2KEM0_MAGO7]	57.61	1	20	20	228	486	486	55.0276	5.84619
G5EHJ2	Citrate synthase OS=Magnaporthe oryzae (strain 70-15 / ATCC MYA-4617 / FGSC 8958) GN=MGCH7_ch7g338 PE=3 SV=1 - [G5EHJ2_MAGO7]	47.59	1	18	19	161	477	477	52.2742	9.11475
G4MKQ2	Hsp70 OS=Magnaporthe oryzae GN=LHS1 PE=3 SV=1 - [A7U5U4_MAGOR]	52.05	2	41	41	188	999	999	109.124	5.96045
G4MU02	Plasma membrane ATPase OS=Magnaporthe oryzae (strain 70-15 / ATCC MYA-4617 / FGSC 8958) GN=MGG_07200 PE=3 SV=1 - [G4MU02_MAGO7]	38.88	1	26	26	169	926	926	100.035	5.18604
G4NJI0	UVI-1 OS=Magnaporthe oryzae (strain 70-15 / ATCC MYA-4617 / FGSC 8958) GN=MGG_02647 PE=4 SV=1 - [G4NJI0_MAGO7]	24.88	2	3	3	134	205	205	21.4216	8.17725
G4MRY4	Transketolase OS=Magnaporthe oryzae (strain P131) GN=OOW_P131scaffold00400g13 PE=3 SV=1 - [L7JDL7_MAGOP]	42.65	1	27	27	220	687	687	75.1165	6.13818
G4MKP3	Endothelin-converting enzyme 2 OS=Magnaporthe oryzae (strain P131) GN=OOW_P131scaffold00343g29 PE=4 SV=1 - [L7JG12_MAGOP]	43.13	1	28	28	182	779	779	85.791	5.74463
G4MRU8	14-3-3 family protein OS=Magnaporthe oryzae (strain 70-15 / ATCC MYA-4617 / FGSC 8958) GN=MGG_13806 PE=3 SV=1 - [G4MRU8_MAGO7]	62.23	3	11	15	139	278	278	30.7653	5.04639
G4N716	Elongation factor 1-alpha OS=Magnaporthe oryzae (strain 70-15 / ATCC MYA-4617 / FGSC 8958) GN=MGG_03641 PE=3 SV=1 - [G4N716_MAGO7]	45.88	31	10	17	275	473	473	51.2578	9.20264
G4MZY1	Peroxisomal hydratase-dehydrogenase-epimerase OS=Magnaporthe oryzae (strain 70-15 / ATCC MYA-4617 / FGSC 8958) GN=MGG_06148 PE=4 SV=1 - [G4MZY1_MAGO7]	48.1	1	33	33	184	896	896	96.3683	7.95752
G4ML11	Nucleoside diphosphate kinase OS=Magnaporthe oryzae (strain 70-15 / ATCC MYA-4617 / FGSC 8958) GN=MGG_08622 PE=3 SV=1 - [G4ML11_MAGO7]	46.84	2	9	9	179	237	237	25.8745	9.27588
G4N0Q4	Uncharacterized protein OS=Magnaporthe oryzae (strain 70-15 / ATCC MYA-4617 / FGSC 8958) GN=MGG_13376 PE=4 SV=1 - [G4N0Q4_MAGO7]	37.4	2	14	14	157	484	484	53.9112	5.51611
G4MNF0	Elongation factor 1-gamma OS=Magnaporthe oryzae (strain P131) GN=OOW_P131scaffold01014g5 PE=4 SV=1 - [L7J4A6_MAGOP]	49.51	1	19	19	190	412	412	47.1848	6.03662
P0CT06	Isocitrate lyase OS=Magnaporthe oryzae (strain 70-15 / ATCC MYA-4617 / FGSC 8958) GN=ICL1 PE=1 SV=1 - [ACEA_MAGO7]	64.35	3	24	24	208	547	547	60.9626	6.81494
G4NDG4	Vacuolar protease A OS=Magnaporthe oryzae (strain P131) GN=OOW_P131scaffold00345g78 PE=3 SV=1 - [L7JHD1_MAGOP]	35.44	2	14	14	192	395	395	43.1338	5.31299
G4N4K3	Pyridoxine biosynthesis protein PDX1 OS=Magnaporthe oryzae (strain 70-15 / ATCC MYA-4617 / FGSC 8958) GN=MGG_05980 PE=3 SV=1 - [G4N4K3_MAGO7]	44.2	1	12	12	150	319	319	33.4059	6.16357
G4MTX9	Inorganic pyrophosphatase OS=Magnaporthe oryzae (strain 70-15 / ATCC MYA-4617 / FGSC 8958) GN=MGG_15739 PE=4 SV=1 - [G4MTX9_MAGO7]	81.72	1	1	19	162	290	290	32.6007	5.45264
G4N0M7	ATP synthase subunit alpha OS=Magnaporthe oryzae (strain P131) GN=OOW_P131scaffold01278g19 PE=3 SV=1 - [L7IXE0_MAGOP]	47.37	2	24	25	184	551	551	59.5382	9.26123
G4NBG7	Uncharacterized protein OS=Magnaporthe oryzae (strain 70-15 / ATCC MYA-4617 / FGSC 8958) GN=MGG_00543 PE=4 SV=1 - [G4NBG7_MAGO7]	47.93	2	25	25	175	726	726	79.4284	5.99854
G4MKR0	ADP,ATP carrier protein OS=Magnaporthe oryzae (strain P131) GN=OOW_P131scaffold00343g45 PE=3 SV=1 - [L7JG25_MAGOP]	54.29	1	15	15	151	315	315	34.0675	9.78857
G4N0Z8	Clathrin heavy chain OS=Magnaporthe oryzae (strain P131) GN=OOW_P131scaffold01278g2 PE=3 SV=1 - [L7IX77_MAGOP]	33.63	1	44	44	153	1680	1680	189.27	5.40186
G4N5E0	NAD-specific glutamate dehydrogenase OS=Magnaporthe oryzae (strain 70-15 / ATCC MYA-4617 / FGSC 8958) GN=MGG_05247 PE=3 SV=1 - [G4N5E0_MAGO7]	42.11	2	36	36	156	1045	1045	117	5.98584
G4MP11	40S ribosomal protein S3 OS=Magnaporthe oryzae (strain 70-15 / ATCC MYA-4617 / FGSC 8958) GN=MGG_05673 PE=3 SV=1 - [G4MP11_MAGO7]	75.19	1	18	18	174	262	262	28.5739	8.95361
G4NDN8	2,3-bisphosphoglycerate-independent phosphoglycerate mutase OS=Magnaporthe oryzae (strain 70-15 / ATCC MYA-4617 / FGSC 8958) GN=MGG_00901 PE=3 SV=1 - [G4NDN8_MAGO7]	45	2	22	22	214	520	520	56.9216	5.46533
G4N2H7	Uncharacterized protein OS=Magnaporthe oryzae (strain 70-15 / ATCC MYA-4617 / FGSC 8958) GN=MGG_07577 PE=4 SV=1 - [G4N2H7_MAGO7]	31.19	1	14	15	119	606	606	66.1658	4.95752
G4ND36	Uncharacterized protein OS=Magnaporthe oryzae (strain 70-15 / ATCC MYA-4617 / FGSC 8958) GN=MGG_00987 PE=4 SV=1 - [G4ND36_MAGO7]	66.22	2	23	23	116	521	521	54.1126	4.66553
G4MW66	Alpha-1,4 glucan phosphorylase OS=Magnaporthe oryzae (strain 70-15 / ATCC MYA-4617 / FGSC 8958) GN=MGG_01819 PE=3 SV=1 - [G4MW66_MAGO7]	51.13	2	38	38	207	888	888	100.629	6.04932
G4N2A5	Peptidase M14 OS=Magnaporthe oryzae (strain 70-15 / ATCC MYA-4617 / FGSC 8958) GN=MGG_04847 PE=4 SV=1 - [G4N2A5_MAGO7]	59.47	1	20	20	133	449	449	49.0808	5.73193
G4MVH5	Uncharacterized protein OS=Magnaporthe oryzae (strain 70-15 / ATCC MYA-4617 / FGSC 8958) GN=MGG_07367 PE=4 SV=1 - [G4MVH5_MAGO7]	40.22	2	6	6	144	276	276	29.5228	5.07178
G4N0X0	Levanase OS=Magnaporthe oryzae (strain 70-15 / ATCC MYA-4617 / FGSC 8958) GN=MGG_05785 PE=3 SV=1 - [G4N0X0_MAGO7]	28.53	3	15	15	140	659	659	71.7604	5.60498
A4QUC1	Leukotriene A-4 hydrolase homolog OS=Magnaporthe oryzae (strain 70-15 / ATCC MYA-4617 / FGSC 8958) GN=MGG_09481 PE=3 SV=2 - [LKHA4_MAGO7]	49.1	1	25	26	131	613	613	69.0692	5.31299
G4N9V8	Aldose 1-epimerase OS=Magnaporthe oryzae (strain 70-15 / ATCC MYA-4617 / FGSC 8958) GN=MGG_03245 PE=4 SV=1 - [G4N9V8_MAGO7]	38.86	2	12	12	158	404	404	45.0038	5.65576
G4ML83	ATP-citrate synthase subunit 2 OS=Magnaporthe oryzae (strain 70-15 / ATCC MYA-4617 / FGSC 8958) GN=MGG_06720 PE=4 SV=1 - [G4ML83_MAGO7]	57.2	1	22	22	191	486	486	52.5733	5.74463
G4MU05	Citrate synthase OS=Magnaporthe oryzae (strain P131) GN=OOW_P131scaffold00461g23 PE=3 SV=1 - [L7JC74_MAGOP]	48.41	1	19	20	201	473	473	52.224	8.74854
G5EHB5	Minor extracellular protease vpr OS=Magnaporthe oryzae (strain 70-15 / ATCC MYA-4617 / FGSC 8958) GN=MGCH7_ch7g237 PE=3 SV=1 - [G5EHB5_MAGO7]	39.16	1	23	23	135	909	909	96.7499	5.22412
G5EHR9	Peroxiredoxin type-2 OS=Magnaporthe oryzae (strain 70-15 / ATCC MYA-4617 / FGSC 8958) GN=MGCH7_ch7g455 PE=4 SV=1 - [G5EHR9_MAGO7]	62.5	1	7	7	159	168	168	17.9931	5.93506
G4NGG4	Uncharacterized protein OS=Magnaporthe oryzae (strain 70-15 / ATCC MYA-4617 / FGSC 8958) GN=MGG_04321 PE=4 SV=1 - [G4NGG4_MAGO7]	43.45	2	44	44	131	1114	1114	117.412	5.19873
G4MQX3	WD repeat-containing protein 38 OS=Magnaporthe oryzae (strain P131) GN=OOW_P131scaffold01370g15 PE=4 SV=1 - [L7IUP4_MAGOP]	70.57	1	18	18	159	316	316	34.9785	7.21045
A4RAE9	Probable Xaa-Pro aminopeptidase PEPP OS=Magnaporthe oryzae (strain 70-15 / ATCC MYA-4617 / FGSC 8958) GN=PEPP PE=3 SV=1 - [AMPP3_MAGO7]	44.52	1	20	20	148	465	465	51.7912	5.99854
A4RF35	Probable Xaa-Pro aminopeptidase P OS=Magnaporthe oryzae (strain 70-15 / ATCC MYA-4617 / FGSC 8958) GN=AMPP PE=3 SV=1 - [AMPP1_MAGO7]	56.8	1	26	26	117	618	618	68.4596	5.47803
G4MWU3	Uncharacterized protein OS=Magnaporthe oryzae (strain 70-15 / ATCC MYA-4617 / FGSC 8958) GN=MGG_15950 PE=4 SV=1 - [G4MWU3_MAGO7]	46.54	2	20	20	167	535	535	58.2881	6.23975
G4NES1	Glycogen debranching enzyme OS=Magnaporthe oryzae (strain P131) GN=OOW_P131scaffold00389g2 PE=4 SV=1 - [L7JEY6_MAGOP]	30.79	2	39	39	118	1588	1588	177.76	5.96045
I0LNZ2	Intracellular beta-galactosidase BgaD OS=Magnaporthe oryzae (strain 70-15 / ATCC MYA-4617 / FGSC 8958) GN=bgaD PE=4 SV=1 - [I0LNZ2_MAGO7]	41.55	7	35	35	205	1030	1030	117.217	6.20166
G4NI16	Fasciclin domain family protein OS=Magnaporthe oryzae (strain P131) GN=OOW_P131scaffold01336g19 PE=4 SV=1 - [L7IUX2_MAGOP]	35.05	2	16	16	196	485	485	53.9629	6.26514
G4MWM2	Peptide hydrolase OS=Magnaporthe oryzae (strain 70-15 / ATCC MYA-4617 / FGSC 8958) GN=MGG_01863 PE=3 SV=1 - [G4MWM2_MAGO7]	37.9	2	12	14	130	504	504	53.6535	4.64014
G4NAD3	60S ribosomal protein L3 OS=Magnaporthe oryzae (strain 70-15 / ATCC MYA-4617 / FGSC 8958) GN=MGG_03193 PE=3 SV=1 - [G4NAD3_MAGO7]	43.37	1	16	16	139	392	392	44.2906	10.1401
G4MUE7	Copper radical oxidase OS=Magnaporthe oryzae (strain 70-15 / ATCC MYA-4617 / FGSC 8958) GN=MGG_01655 PE=4 SV=1 - [G4MUE7_MAGO7]	17.45	2	12	12	103	1003	1003	105.033	5.07178
G4N6A5	Peptide hydrolase OS=Magnaporthe oryzae (strain 70-15 / ATCC MYA-4617 / FGSC 8958) GN=MGG_06587 PE=3 SV=1 - [G4N6A5_MAGO7]	34.7	1	10	10	136	389	389	43.5267	5.96045
G4ND25	alpha-1,2-Mannosidase OS=Magnaporthe oryzae (strain P131) GN=OOW_P131scaffold00532g1 PE=3 SV=1 - [L7JA14_MAGOP]	37.38	2	13	13	136	527	527	58.1718	5.36377
G4NJB0	Woronin body major protein OS=Magnaporthe oryzae (strain 70-15 / ATCC MYA-4617 / FGSC 8958) GN=MGG_02696 PE=4 SV=1 - [G4NJB0_MAGO7]	25.9	4	9	9	101	417	417	48.0118	7.73779
G4ND56	Mitochondrial outer membrane protein porin OS=Magnaporthe oryzae (strain 70-15 / ATCC MYA-4617 / FGSC 8958) GN=MGG_00968 PE=4 SV=1 - [G4ND56_MAGO7]	62.9	1	1	16	133	283	283	29.9375	9.26123
G4MLP9	1,3-beta-glucanosyltransferase OS=Magnaporthe oryzae (strain 70-15 / ATCC MYA-4617 / FGSC 8958) GN=MGG_11861 PE=3 SV=1 - [G4MLP9_MAGO7]	35.8	2	18	18	131	528	528	56.526	5.88428
G4N028	Uncharacterized protein OS=Magnaporthe oryzae (strain 70-15 / ATCC MYA-4617 / FGSC 8958) GN=MGG_06189 PE=4 SV=1 - [G4N028_MAGO7]	36.41	1	12	12	89	390	390	40.6148	5.89697
G4MS37	Amidohydrolase family protein OS=Magnaporthe oryzae (strain P131) GN=OOW_P131scaffold00659g7 PE=4 SV=1 - [L7J9R3_MAGOP]	42.39	2	29	29	170	979	979	104.865	6.60986
G4MV32	Malate dehydrogenase OS=Magnaporthe oryzae (strain P131) GN=OOW_P131scaffold00195g48 PE=3 SV=1 - [L7JLE5_MAGOP]	63.94	2	15	16	145	330	330	34.2885	7.35693
G4MTC2	Ribosomal protein OS=Magnaporthe oryzae PE=2 SV=1 - [D4NXB6_MAGOR]	46.08	1	10	10	107	217	217	23.9881	9.89111
G5EH48	Amine oxidase OS=Magnaporthe oryzae (strain 70-15 / ATCC MYA-4617 / FGSC 8958) GN=MGCH7_ch7g29 PE=3 SV=1 - [G5EH48_MAGO7]	46.72	1	26	26	172	640	640	72.3081	5.85889
G4N3R3	Exo-beta-D-glucosaminidase OS=Magnaporthe oryzae (strain P131) GN=OOW_P131scaffold01226g1 PE=4 SV=1 - [L7IXY1_MAGOP]	36.92	1	31	31	169	956	956	104.921	5.80811
G4N5D8	Alpha-L-rhamnosidase A OS=Magnaporthe oryzae (strain 70-15 / ATCC MYA-4617 / FGSC 8958) GN=MGG_05246 PE=4 SV=1 - [G4N5D8_MAGO7]	31.11	1	19	19	99	733	733	79.3134	5.79541
Q9P4R4	Saccharopine dehydrogenase [NADP(+), L-glutamate-forming] OS=Magnaporthe oryzae (strain 70-15 / ATCC MYA-4617 / FGSC 8958) GN=LYS3 PE=1 SV=2 - [LYS9_MAGO7]	59.56	2	21	21	189	450	450	49.0663	6.46826
G4MR77	Beta-hexosaminidase OS=Magnaporthe oryzae (strain 70-15 / ATCC MYA-4617 / FGSC 8958) GN=MGG_09922 PE=3 SV=1 - [G4MR77_MAGO7]	37.07	1	20	20	171	580	580	65.815	6.29053
G4NDL4	Fructose-bisphosphate aldolase 1 OS=Magnaporthe oryzae (strain 70-15 / ATCC MYA-4617 / FGSC 8958) GN=MGG_00223 PE=4 SV=1 - [G4NDL4_MAGO7]	55	2	13	13	124	360	360	39.7511	5.92236
P56221	Scytalone dehydratase OS=Magnaporthe oryzae (strain 70-15 / ATCC MYA-4617 / FGSC 8958) GN=SDH1 PE=1 SV=1 - [SCYD_MAGO7]	56.4	2	10	10	159	172	172	20.237	6.30322
G4MYA0	V-type proton ATPase catalytic subunit A OS=Magnaporthe oryzae (strain 70-15 / ATCC MYA-4617 / FGSC 8958) GN=MGG_08087 PE=3 SV=1 - [G4MYA0_MAGO7]	56.25	2	30	30	136	608	608	67.2842	5.46533
G4NIT9	Fatty acid synthase beta subunit dehydratase OS=Magnaporthe oryzae (strain 70-15 / ATCC MYA-4617 / FGSC 8958) GN=MGG_04118 PE=4 SV=1 - [G4NIT9_MAGO7]	44.48	2	69	69	181	2120	2120	235.706	6.354
G4NIW8	1-aminocyclopropane-1-carboxylate deaminase OS=Magnaporthe oryzae (strain 70-15 / ATCC MYA-4617 / FGSC 8958) GN=MGG_02812 PE=4 SV=1 - [G4NIW8_MAGO7]	57.86	2	19	19	120	401	401	43.4531	8.06006
G4MNA3	Amino-acid permease inda1 OS=Magnaporthe oryzae (strain P131) GN=OOW_P131scaffold00166g7 PE=4 SV=1 - [L7JP66_MAGOP]	24.34	2	12	12	102	571	571	62.442	6.91748
G5EH09	2-methylcitrate dehydratase OS=Magnaporthe oryzae (strain 70-15 / ATCC MYA-4617 / FGSC 8958) GN=MGCH7_ch7g591 PE=4 SV=1 - [G5EH09_MAGO7]	47.54	1	21	21	124	570	570	62.5619	7.84033
G4MR82	Glucose-6-phosphate 1-dehydrogenase OS=Magnaporthe oryzae (strain 70-15 / ATCC MYA-4617 / FGSC 8958) GN=MGG_09926 PE=3 SV=1 - [G4MR82_MAGO7]	55.03	2	26	26	133	507	507	58.3127	6.55127
G4N375	Uncharacterized protein OS=Magnaporthe oryzae (strain 70-15 / ATCC MYA-4617 / FGSC 8958) GN=MGG_04944 PE=4 SV=1 - [G4N375_MAGO7]	39.33	2	8	8	93	267	267	27.2768	5.87158
G4MPQ2	Amidohydrolase OS=Magnaporthe oryzae (strain 70-15 / ATCC MYA-4617 / FGSC 8958) GN=MGG_02243 PE=4 SV=1 - [G4MPQ2_MAGO7]	31.15	1	13	13	107	504	504	54.8123	4.94482
G4N674	Uncharacterized protein OS=Magnaporthe oryzae (strain 70-15 / ATCC MYA-4617 / FGSC 8958) GN=MGG_08589 PE=4 SV=1 - [G4N674_MAGO7]	39.67	2	10	10	80	368	368	39.633	5.22412
G4N4A9	Acyl-CoA dehydrogenase OS=Magnaporthe oryzae (strain 70-15 / ATCC MYA-4617 / FGSC 8958) GN=MGG_05949 PE=4 SV=1 - [G4N4A9_MAGO7]	40.74	1	19	19	128	513	513	57.6492	7.59131
G4MVA2	3-carboxymuconate cyclase OS=Magnaporthe oryzae (strain 70-15 / ATCC MYA-4617 / FGSC 8958) GN=MGG_01732 PE=4 SV=1 - [G4MVA2_MAGO7]	53.28	5	16	16	102	396	396	41.324	5.23682
G4MTY9	Methylmalonate-semialdehyde dehydrogenase, mitochondrial OS=Magnaporthe oryzae (strain P131) GN=OOW_P131scaffold01287g75 PE=4 SV=1 - [L7IXA8_MAGOP]	49.54	2	21	21	120	543	543	57.8657	6.354
G4MV25	1,3-beta-glucanosyltransferase OS=Magnaporthe oryzae (strain 70-15 / ATCC MYA-4617 / FGSC 8958) GN=MGG_07331 PE=3 SV=1 - [G4MV25_MAGO7]	35.65	1	15	15	103	446	446	48.8099	5.51611
G4MSU7	Phosphoacetylglucosamine mutase OS=Magnaporthe oryzae (strain 70-15 / ATCC MYA-4617 / FGSC 8958) GN=MGG_11383 PE=4 SV=1 - [G4MSU7_MAGO7]	41.12	1	18	18	109	552	552	60.3588	6.11279
G4N2Y7	Acetolactate synthase OS=Magnaporthe oryzae (strain 70-15 / ATCC MYA-4617 / FGSC 8958) GN=MGG_07628 PE=3 SV=1 - [G4N2Y7_MAGO7]	40.28	5	16	16	107	581	581	62.3218	6.37939
G4MYL3	UDP-N-acetylglucosamine pyrophosphorylase OS=Magnaporthe oryzae (strain P131) GN=OOW_P131scaffold00178g10 PE=4 SV=1 - [L7JN00_MAGOP]	75.6	1	32	32	170	504	504	54.6762	5.92236
G4MRB4	Serine hydroxymethyltransferase OS=Magnaporthe oryzae (strain 70-15 / ATCC MYA-4617 / FGSC 8958) GN=MGG_13781 PE=3 SV=1 - [G4MRB4_MAGO7]	56.4	1	22	23	154	516	516	56.814	9.12939
G4NB44	Neutral ceramidase OS=Magnaporthe oryzae (strain 70-15 / ATCC MYA-4617 / FGSC 8958) GN=MGG_11535 PE=4 SV=1 - [G4NB44_MAGO7]	28.18	1	17	18	91	770	770	83.1283	5.46533
G4NE44	Succinate dehydrogenase [ubiquinone] flavoprotein subunit, mitochondrial OS=Magnaporthe oryzae (strain 70-15 / ATCC MYA-4617 / FGSC 8958) GN=MGG_00168 PE=3 SV=1 - [G4NE44_MAGO7]	47.52	1	24	24	109	646	646	70.4417	6.82959
G4N1K6	Endoglucanase family 5 glycoside hydrolase OS=Magnaporthe oryzae (strain P131) GN=OOW_P131scaffold01364g3 PE=3 SV=1 - [L7ITS1_MAGOP]	55.56	2	23	23	129	468	468	54.2051	5.85889
G4N0E2	Spermidine synthase OS=Magnaporthe oryzae (strain 70-15 / ATCC MYA-4617 / FGSC 8958) GN=MGG_06197 PE=3 SV=1 - [G4N0E2_MAGO7]	52.22	4	12	12	147	293	293	33.3617	5.52881
G4MZI9	Glutathione S-transferase Gst3 OS=Magnaporthe oryzae (strain P131) GN=OOW_P131scaffold00955g15 PE=4 SV=1 - [L7J626_MAGOP]	64.24	2	17	17	151	344	344	39.1446	6.53662
G4MS18	Alpha-glucosidase OS=Magnaporthe oryzae (strain P131) GN=OOW_P131scaffold00633g19 PE=3 SV=1 - [L7J884_MAGOP]	22.18	1	20	20	115	965	965	107.908	5.5415
G4MKR3	40S ribosomal protein S5 OS=Magnaporthe oryzae PE=2 SV=1 - [D4NXE0_MAGOR]	48.13	2	11	11	112	214	214	23.7955	9.18799
G4N6T2	Importin subunit beta-1 OS=Magnaporthe oryzae (strain 70-15 / ATCC MYA-4617 / FGSC 8958) GN=MGG_03668 PE=4 SV=1 - [G4N6T2_MAGO7]	35.39	2	22	22	90	876	876	95.8749	4.70361
G4N8Z2	Uncharacterized protein OS=Magnaporthe oryzae (strain P131) GN=OOW_P131scaffold00459g53 PE=4 SV=1 - [L7JDY5_MAGOP]	23.02	2	6	6	141	265	265	29.0627	5.42725
G4MU82	Peroxisomal dehydratase OS=Magnaporthe oryzae (strain 70-15 / ATCC MYA-4617 / FGSC 8958) GN=MGG_04839 PE=4 SV=1 - [G4MU82_MAGO7]	65.16	1	14	14	117	310	310	33.7704	8.47021
G4NI53	Uncharacterized protein OS=Magnaporthe oryzae (strain 70-15 / ATCC MYA-4617 / FGSC 8958) GN=MGG_17802 PE=4 SV=1 - [G4NI53_MAGO7]	43.21	1	19	19	148	449	449	50.0904	6.66846
G4MXQ5	Glycerophosphoryl diester phosphodiesterase OS=Magnaporthe oryzae (strain 70-15 / ATCC MYA-4617 / FGSC 8958) GN=MGG_08047 PE=4 SV=1 - [G4MXQ5_MAGO7]	60.61	2	22	22	145	424	424	46.3392	5.41455
G4NDW5	Delta-1-pyrroline-5-carboxylate dehydrogenase OS=Magnaporthe oryzae (strain 70-15 / ATCC MYA-4617 / FGSC 8958) GN=MGG_17513 PE=3 SV=1 - [G4NDW5_MAGO7]	47.33	2	23	23	181	600	600	65.1885	8.79248
G4MKJ9	60S acidic ribosomal protein P0 OS=Magnaporthe oryzae (strain P131) GN=OOW_P131scaffold01159g6 PE=3 SV=1 - [L7J2D7_MAGOP]	48.24	1	10	10	104	313	313	33.5921	4.90674
G4N6X3	Uncharacterized protein OS=Magnaporthe oryzae (strain 70-15 / ATCC MYA-4617 / FGSC 8958) GN=MGG_06503 PE=4 SV=1 - [G4N6X3_MAGO7]	41.36	1	16	16	127	486	486	53.6693	6.30322
G4MUF4	4-aminobutyrate aminotransferase OS=Magnaporthe oryzae (strain P131) GN=OOW_P131scaffold01287g17 PE=3 SV=1 - [L7IYZ1_MAGOP]	43.74	1	19	19	108	503	503	55.6466	7.59131
G4MTN6	O-acetylhomoserine (Thiol)-lyase OS=Magnaporthe oryzae (strain P131) GN=OOW_P131scaffold00461g13 PE=3 SV=1 - [L7JC64_MAGOP]	52.85	1	17	17	122	456	456	48.839	6.59521
G4NDI0	Cytosolic non-specific dipeptidase OS=Magnaporthe oryzae (strain 70-15 / ATCC MYA-4617 / FGSC 8958) GN=MGG_00256 PE=4 SV=1 - [G4NDI0_MAGO7]	38.1	1	1	18	134	559	559	62.0433	6.91748
G4MZC8	Endo-1,4-beta-xylanase D OS=Magnaporthe oryzae (strain 70-15 / ATCC MYA-4617 / FGSC 8958) GN=MGG_11400 PE=3 SV=1 - [G4MZC8_MAGO7]	35.73	1	3	13	105	487	487	53.7362	5.47803
G4N1N3	Bilirubin oxidase OS=Magnaporthe oryzae (strain 70-15 / ATCC MYA-4617 / FGSC 8958) GN=MGG_07500 PE=4 SV=1 - [G4N1N3_MAGO7]	49.76	2	24	24	125	627	627	70.8451	5.98584
G4N4R7	Adenosylhomocysteinase OS=Magnaporthe oryzae (strain 70-15 / ATCC MYA-4617 / FGSC 8958) GN=MGG_05155 PE=3 SV=1 - [G4N4R7_MAGO7]	43.21	1	18	18	143	449	449	48.9199	6.37939
G4N807	Aminotransferase OS=Magnaporthe oryzae (strain P131) GN=OOW_P131scaffold00333g6 PE=3 SV=1 - [L7JGW6_MAGOP]	41.96	1	15	15	109	460	460	49.8521	6.66846
G4N0N1	Pyruvate carboxylase OS=Magnaporthe oryzae (strain P131) GN=OOW_P131scaffold01278g15 PE=4 SV=1 - [L7IYC5_MAGOP]	33.08	1	34	34	139	1197	1197	131.623	6.45557
G5EGZ3	Uncharacterized protein OS=Magnaporthe oryzae (strain 70-15 / ATCC MYA-4617 / FGSC 8958) GN=MGCH7_ch7g574 PE=4 SV=1 - [G5EGZ3_MAGO7]	32.69	1	17	18	114	618	618	69.9487	6.03662
G4MM08	Disulfide-isomerase A6 OS=Magnaporthe oryzae (strain P131) GN=OOW_P131scaffold01049g10 PE=4 SV=1 - [L7J4I4_MAGOP]	45.01	1	17	17	109	471	471	50.5182	7.43018
A4QUF0	Polyadenylate-binding protein, cytoplasmic and nuclear OS=Magnaporthe oryzae (strain 70-15 / ATCC MYA-4617 / FGSC 8958) GN=PAB1 PE=3 SV=1 - [PABP_MAGO7]	35.17	1	23	23	109	762	762	81.8834	5.71924
A4RC89	Nascent polypeptide-associated complex subunit alpha OS=Magnaporthe oryzae (strain 70-15 / ATCC MYA-4617 / FGSC 8958) GN=EGD2 PE=3 SV=1 - [NACA_MAGO7]	51.74	1	4	6	46	201	201	21.8068	4.81787
G4N517	Cell division control protein 48 OS=Magnaporthe oryzae (strain 70-15 / ATCC MYA-4617 / FGSC 8958) GN=MGG_05193 PE=3 SV=1 - [G4N517_MAGO7]	48.41	1	30	31	108	820	820	89.8618	5.07178
G4NGK1	60S ribosomal protein L22 OS=Magnaporthe oryzae PE=2 SV=1 - [D4NXC3_MAGOR]	52	1	6	6	101	125	125	14.2136	9.23193
G4MSW3	60S ribosomal protein L8-B OS=Magnaporthe oryzae (strain 70-15 / ATCC MYA-4617 / FGSC 8958) GN=MGG_04612 PE=4 SV=1 - [G4MSW3_MAGO7]	56.32	1	15	15	103	261	261	29.1413	10.2573
G4NGQ9	Proteasome endopeptidase complex OS=Magnaporthe oryzae (strain P131) GN=OOW_P131scaffold01683g34 PE=3 SV=1 - [L7IRI5_MAGOP]	61.68	1	15	15	113	274	274	30.0932	5.56689
G4MNZ8	40S ribosomal protein S18 OS=Magnaporthe oryzae (strain 70-15 / ATCC MYA-4617 / FGSC 8958) GN=MGG_05661 PE=3 SV=1 - [G4MNZ8_MAGO7]	57.69	1	13	13	90	156	156	17.7748	10.6675
P0CT13	Histone H2B OS=Magnaporthe oryzae (strain Y34) GN=HTB1 PE=2 SV=1 - [H2B_MAGOY]	48.91	1	8	8	73	137	137	14.836	10.1255
G4MPD6	Cellobiose dehydrogenase OS=Magnaporthe oryzae (strain 70-15 / ATCC MYA-4617 / FGSC 8958) GN=MGG_09189 PE=3 SV=1 - [G4MPD6_MAGO7]	41.73	1	17	17	105	568	568	60.8537	5.73193
G4MU70	60S ribosomal protein L9-A OS=Magnaporthe oryzae (strain 70-15 / ATCC MYA-4617 / FGSC 8958) GN=MGG_04829 PE=4 SV=1 - [G4MU70_MAGO7]	56.19	2	9	9	146	194	194	21.7707	9.40771
G4NI46	Minor extracellular protease vpr OS=Magnaporthe oryzae (strain P131) GN=OOW_P131scaffold01258g10 PE=3 SV=1 - [L7IYQ9_MAGOP]	33.77	3	26	26	155	906	906	97.4548	5.41455
G4MWG4	Stress-induced-phosphoprotein 1 OS=Magnaporthe oryzae (strain P131) GN=OOW_P131scaffold00572g12 PE=4 SV=1 - [L7J911_MAGOP]	43.35	2	21	21	96	579	579	64.2119	5.57959
Q12634	Tetrahydroxynaphthalene reductase OS=Magnaporthe oryzae (strain 70-15 / ATCC MYA-4617 / FGSC 8958) GN=MGG_02252 PE=1 SV=2 - [T4HR_MAGO7]	63.25	1	15	16	98	283	283	30.0342	6.68311
G4MQN7	Dolichyl-diphosphooligosaccharide--protein glycosyltransferase subunit 1 OS=Magnaporthe oryzae (strain 70-15 / ATCC MYA-4617 / FGSC 8958) GN=MGG_09287 PE=3 SV=1 - [G4MQN7_MAGO7]	53.31	1	22	22	143	484	484	54.4633	9.27588
G4N5C0	3-oxoadipate enol-lactonase OS=Magnaporthe oryzae (strain P131) GN=OOW_P131scaffold00159g12 PE=4 SV=1 - [L7JMF4_MAGOP]	74.13	2	15	15	104	286	286	30.9528	5.68115
G5EHQ5	Phosphotransferase OS=Magnaporthe oryzae (strain 70-15 / ATCC MYA-4617 / FGSC 8958) GN=MGCH7_ch7g833 PE=3 SV=1 - [G5EHQ5_MAGO7]	50.1	1	19	19	83	495	495	53.8405	5.17334
A4QVP2	ATP-dependent RNA helicase eIF4A OS=Magnaporthe oryzae (strain 70-15 / ATCC MYA-4617 / FGSC 8958) GN=TIF1 PE=3 SV=1 - [IF4A_MAGO7]	38.13	1	13	16	102	396	396	44.7208	5.18604
G4MWP1	Beta-glucosidase OS=Magnaporthe oryzae (strain 70-15 / ATCC MYA-4617 / FGSC 8958) GN=MGG_01885 PE=3 SV=1 - [G4MWP1_MAGO7]	27.98	4	17	17	106	797	797	85.4898	5.08447
G4NFK7	Uncharacterized protein OS=Magnaporthe oryzae (strain 70-15 / ATCC MYA-4617 / FGSC 8958) GN=MGG_14145 PE=4 SV=1 - [G4NFK7_MAGO7]	47.48	2	18	18	85	516	516	54.6492	5.17334
G4NH40	V-type proton ATPase subunit a OS=Magnaporthe oryzae (strain P131) GN=OOW_P131scaffold00559g25 PE=3 SV=1 - [L7J9E3_MAGOP]	30.82	2	22	22	126	850	850	96.9211	5.36377
A4RK68	Eukaryotic translation initiation factor 3 subunit M OS=Magnaporthe oryzae (strain 70-15 / ATCC MYA-4617 / FGSC 8958) GN=MGG_01595 PE=3 SV=1 - [EIF3M_MAGO7]	40.97	1	16	16	57	432	432	49.5894	5.65576
G4NKL2	Aspartate-semialdehyde dehydrogenase OS=Magnaporthe oryzae (strain 70-15 / ATCC MYA-4617 / FGSC 8958) GN=MGG_03051 PE=3 SV=1 - [G4NKL2_MAGO7]	39.67	2	12	12	85	363	363	38.6247	6.63916
A4RPY8	Carboxypeptidase Y homolog A OS=Magnaporthe oryzae (strain 70-15 / ATCC MYA-4617 / FGSC 8958) GN=CPYA PE=3 SV=1 - [CBPYA_MAGO7]	29.17	2	11	11	72	552	552	61.5541	5.71924
G4MYU8	Disulfide-isomerase erp38 OS=Magnaporthe oryzae (strain P131) GN=OOW_P131scaffold01180g10 PE=3 SV=1 - [L7IZX5_MAGOP]	43.4	1	11	11	55	371	371	40.0086	6.63916
Q2KEU7	Uncharacterized protein OS=Magnaporthe oryzae (strain 70-15 / ATCC MYA-4617 / FGSC 8958) GN=MGCH7_ch7g939 PE=4 SV=1 - [Q2KEU7_MAGO7]	34.75	1	2	2	33	118	118	11.5746	7.57666
G4MYB7	41 kDa peptidyl-prolyl cis-trans isomerase OS=Magnaporthe oryzae (strain P131) GN=OOW_P131scaffold00067g9 PE=4 SV=1 - [L7JPP2_MAGOP]	45.21	1	13	13	94	376	376	40.7768	6.48096
G4N6X9	S-methyl-5'-thioadenosine phosphorylase OS=Magnaporthe oryzae (strain P131) GN=OOW_P131scaffold00415g4 PE=3 SV=1 - [L7JED3_MAGOP]	44.83	1	13	13	95	319	319	34.2433	6.39209
G4N014	Uncharacterized protein OS=Magnaporthe oryzae (strain P131) GN=OOW_P131scaffold00455g41 PE=4 SV=1 - [L7JCI2_MAGOP]	71.15	2	7	7	110	104	104	11.352	5.60498
G4N0I6	Phosphomevalonate kinase OS=Magnaporthe oryzae (strain 70-15 / ATCC MYA-4617 / FGSC 8958) GN=MGG_05812 PE=4 SV=1 - [G4N0I6_MAGO7]	29.89	1	11	11	76	445	445	47.0923	5.92236
G4NJT2	Uncharacterized protein OS=Magnaporthe oryzae (strain 70-15 / ATCC MYA-4617 / FGSC 8958) GN=MGG_10327 PE=4 SV=1 - [G4NJT2_MAGO7]	31.41	2	20	20	90	729	729	81.9186	6.39209
G4NIE7	Beta-glucanase OS=Magnaporthe oryzae (strain 70-15 / ATCC MYA-4617 / FGSC 8958) GN=MGG_09861 PE=4 SV=1 - [G4NIE7_MAGO7]	36.04	2	6	6	62	283	283	31.0842	5.38916
G4N7K3	Ornithine aminotransferase OS=Magnaporthe oryzae (strain 70-15 / ATCC MYA-4617 / FGSC 8958) GN=MGG_06392 PE=3 SV=1 - [G4N7K3_MAGO7]	43.89	3	15	15	75	442	442	47.3782	6.58057
G4N6U9	60S ribosomal protein L20 OS=Magnaporthe oryzae (strain 70-15 / ATCC MYA-4617 / FGSC 8958) GN=MGG_03653 PE=3 SV=1 - [G4N6U9_MAGO7]	55.17	1	11	11	122	174	174	20.44	10.5649
G4N6P6	Inosine-5'-monophosphate dehydrogenase OS=Magnaporthe oryzae (strain P131) GN=OOW_P131scaffold01168g47 PE=3 SV=1 - [L7J078_MAGOP]	38.86	1	15	15	83	543	543	57.2935	6.81494
G4MSC0	60S ribosomal protein L6 OS=Magnaporthe oryzae (strain 70-15 / ATCC MYA-4617 / FGSC 8958) GN=MGG_04444 PE=3 SV=1 - [G4MSC0_MAGO7]	47.52	1	11	11	78	202	202	22.4722	10.1548
G4NIC7	Acetyltransferase component of pyruvate dehydrogenase complex OS=Magnaporthe oryzae (strain P131) GN=OOW_P131scaffold00119g3 PE=3 SV=1 - [L7JNX5_MAGOP]	51.94	1	17	17	86	464	464	49.3448	7.50342
G4NGD7	Uncharacterized protein OS=Magnaporthe oryzae (strain 70-15 / ATCC MYA-4617 / FGSC 8958) GN=MGG_04344 PE=4 SV=1 - [G4NGD7_MAGO7]	31.14	1	10	12	101	562	562	61.9951	5.23682
G4MLG1	Acyl-CoA dehydrogenase family member 11 OS=Magnaporthe oryzae (strain 70-15 / ATCC MYA-4617 / FGSC 8958) GN=MGG_08661 PE=3 SV=1 - [G4MLG1_MAGO7]	60.62	1	25	25	101	452	452	50.3289	8.77783
G4N7P0	Threonyl-tRNA synthetase OS=Magnaporthe oryzae (strain P131) GN=OOW_P131scaffold01337g18 PE=3 SV=1 - [L7IUP0_MAGOP]	42	1	33	33	137	812	812	91.6927	6.81494
G4NA37	Diphosphomevalonate decarboxylase OS=Magnaporthe oryzae (strain P131) GN=OOW_P131scaffold00517g5 PE=3 SV=1 - [L7JAE4_MAGOP]	61.56	1	17	17	90	385	385	40.7526	6.07471
G4MLS9	Venom protein 2 OS=Magnaporthe oryzae (strain Y34) GN=OOU_Y34scaffold00467g2 PE=4 SV=1 - [L7I9R3_MAGOY]	46.41	2	16	16	92	474	474	53.1858	5.19873
G4NCY1	Glucosamine-fructose-6-phosphate aminotransferase OS=Magnaporthe oryzae (strain P131) GN=OOW_P131scaffold00220g63 PE=4 SV=1 - [L7JME2_MAGOP]	43.48	1	26	26	109	706	706	78.2015	6.58057
G4N7B3	Alanine--tRNA ligase OS=Magnaporthe oryzae (strain P131) GN=ALA1 PE=3 SV=1 - [L7IWT3_MAGOP]	29.34	2	27	27	97	961	961	107.484	5.75732
G4NCM6	Glucanase B OS=Magnaporthe oryzae (strain 70-15 / ATCC MYA-4617 / FGSC 8958) GN=MGG_00375 PE=4 SV=1 - [G4NCM6_MAGO7]	38.21	3	10	10	90	424	424	45.5297	5.16064
G4NDG3	Serine hydroxymethyltransferase OS=Magnaporthe oryzae (strain 70-15 / ATCC MYA-4617 / FGSC 8958) GN=MGG_00923 PE=3 SV=1 - [G4NDG3_MAGO7]	53.53	1	21	22	100	482	482	53.1242	7.60596
G4N4J6	Uncharacterized protein OS=Magnaporthe oryzae (strain 70-15 / ATCC MYA-4617 / FGSC 8958) GN=MGG_16728 PE=4 SV=1 - [G4N4J6_MAGO7]	52.54	1	15	15	96	295	295	32.2895	6.43018
G4N0Y1	Uncharacterized protein OS=Magnaporthe oryzae (strain 70-15 / ATCC MYA-4617 / FGSC 8958) GN=MGG_09571 PE=4 SV=1 - [G4N0Y1_MAGO7]	34.41	1	29	29	96	709	709	75.0542	5.35107
G4NCH2	Glyceraldehyde-3-phosphate dehydrogenase OS=Magnaporthe oryzae (strain 70-15 / ATCC MYA-4617 / FGSC 8958) GN=MGG_01084 PE=3 SV=1 - [G4NCH2_MAGO7]	56.25	2	13	13	98	336	336	35.9092	6.91748
G4NC30	Phosphoenolpyruvate carboxykinase OS=Magnaporthe oryzae (strain 70-15 / ATCC MYA-4617 / FGSC 8958) GN=MGG_00450 PE=3 SV=1 - [G4NC30_MAGO7]	47.25	2	22	22	91	601	601	66.5791	6.37939
G4N6M9	Aspartate aminotransferase OS=Magnaporthe oryzae (strain 70-15 / ATCC MYA-4617 / FGSC 8958) GN=MGG_06530 PE=4 SV=1 - [G4N6M9_MAGO7]	48.15	2	15	15	80	405	405	44.3777	8.90967
G4NCY0	Proteasome subunit beta type OS=Magnaporthe oryzae (strain P131) GN=OOW_P131scaffold00220g62 PE=3 SV=1 - [L7JLK6_MAGOP]	46.47	1	9	9	54	269	269	29.2907	5.5415
G5EHU9	Nuclease PA3 OS=Magnaporthe oryzae (strain 70-15 / ATCC MYA-4617 / FGSC 8958) GN=MGCH7_ch7g611 PE=4 SV=1 - [G5EHU9_MAGO7]	49.02	1	11	11	90	306	306	34.1081	6.01123
G4NAN2	Beta-lactamase OS=Magnaporthe oryzae (strain 70-15 / ATCC MYA-4617 / FGSC 8958) GN=MGG_08486 PE=4 SV=1 - [G4NAN2_MAGO7]	31.85	2	17	17	107	606	606	64.8486	5.04639
G4NEG2	Uncharacterized protein OS=Magnaporthe oryzae (strain P131) GN=OOW_P131scaffold00034g21 PE=4 SV=1 - [L7JRD7_MAGOP]	56.35	2	8	8	71	197	197	21.4207	5.13525
G4NLP5	Uncharacterized protein OS=Magnaporthe oryzae (strain 70-15 / ATCC MYA-4617 / FGSC 8958) GN=MGG_12569 PE=3 SV=1 - [G4NLP5_MAGO7]	59.01	2	11	11	74	222	222	24.1242	5.46533
G4MPT3	30S ribosomal protein S5 OS=Magnaporthe oryzae (strain 70-15 / ATCC MYA-4617 / FGSC 8958) GN=MGG_16248 PE=3 SV=1 - [G4MPT3_MAGO7]	46.79	1	12	12	82	265	265	28.7806	10.4038
G4MQH0	Abhydrolase OS=Magnaporthe oryzae (strain 70-15 / ATCC MYA-4617 / FGSC 8958) GN=MGG_02306 PE=4 SV=1 - [G4MQH0_MAGO7]	14.55	1	4	4	70	275	275	28.6273	4.84326
Q2KEH7	Putative uncharacterized protein OS=Magnaporthe oryzae (strain 70-15 / ATCC MYA-4617 / FGSC 8958) GN=MGCH7_ch7g1059 PE=4 SV=1 - [Q2KEH7_MAGO7]	42.79	1	19	19	111	596	596	65.879	5.46533
G4ND45	Uncharacterized protein OS=Magnaporthe oryzae (strain 70-15 / ATCC MYA-4617 / FGSC 8958) GN=MGG_00978 PE=4 SV=1 - [G4ND45_MAGO7]	35.94	2	8	8	31	345	345	39.2443	6.65381
G4NGQ3	Phosphoserine aminotransferase OS=Magnaporthe oryzae (strain 70-15 / ATCC MYA-4617 / FGSC 8958) GN=MGG_04059 PE=3 SV=1 - [G4NGQ3_MAGO7]	48.48	1	17	17	84	427	427	45.715	7.50342
G4MRZ3	Nuclear transport factor 2 OS=Magnaporthe oryzae PE=2 SV=1 - [D4NXG2_MAGOR]	32.54	1	3	3	66	126	126	14.3203	5.05908
G4NIZ7	Fumarate hydratase class II 1 OS=Magnaporthe oryzae (strain Y34) GN=OOU_Y34scaffold00301g13 PE=3 SV=1 - [L7ICU1_MAGOY]	51.59	6	18	18	99	471	471	50.7382	6.48096
G4MT60	Rab GDP dissociation inhibitor OS=Magnaporthe oryzae (strain 70-15 / ATCC MYA-4617 / FGSC 8958) GN=MGG_07137 PE=3 SV=1 - [G4MT60_MAGO7]	53.02	1	18	18	93	464	464	50.8958	5.75732
G4MZ86	60S ribosomal protein L4-A OS=Magnaporthe oryzae (strain 70-15 / ATCC MYA-4617 / FGSC 8958) GN=MGG_08190 PE=4 SV=1 - [G4MZ86_MAGO7]	56.87	1	15	15	82	371	371	39.8905	10.8872
G4MMM3	ATP-dependent Zn protease OS=Magnaporthe oryzae (strain 70-15 / ATCC MYA-4617 / FGSC 8958) GN=MGG_16395 PE=4 SV=1 - [G4MMM3_MAGO7]	47.38	2	17	17	99	477	477	53.4996	5.36377
G5EHX7	40S ribosomal protein S4 OS=Magnaporthe oryzae (strain 70-15 / ATCC MYA-4617 / FGSC 8958) GN=MGCH7_ch7g494 PE=3 SV=1 - [G5EHX7_MAGO7]	64.5	2	18	18	145	262	262	29.4549	10.1548
G4MZI3	NAD(P)H-dependent pentose reductase OS=Magnaporthe oryzae (strain 70-15 / ATCC MYA-4617 / FGSC 8958) GN=PRD1 PE=1 SV=1 - [PRD1_MAGO7]	56.1	1	17	17	89	328	328	37.0831	6.53662
G4NF57	Hsp70-like protein OS=Magnaporthe oryzae (strain 70-15 / ATCC MYA-4617 / FGSC 8958) GN=MGG_04191 PE=3 SV=1 - [G4NF57_MAGO7]	28.1	1	17	18	60	669	669	72.5608	6.21436
G4N809	Acetamidase OS=Magnaporthe oryzae (strain 70-15 / ATCC MYA-4617 / FGSC 8958) GN=MGG_03492 PE=4 SV=1 - [G4N809_MAGO7]	49.1	3	23	23	126	558	558	62.4235	7.07861
G4N012	Uncharacterized protein OS=Magnaporthe oryzae (strain 70-15 / ATCC MYA-4617 / FGSC 8958) GN=MGG_06175 PE=4 SV=1 - [G4N012_MAGO7]	33.1	2	22	22	83	722	722	81.6125	7.81104
A0A151V4L3	NAP family protein OS=Magnaporthe oryzae (strain P131) GN=OOW_P131scaffold00271g2 PE=3 SV=1 - [L7JIU0_MAGOP]	39.27	2	10	10	72	331	331	36.7889	4.4751
G4MYL8	NIMA-interacting protein TinC OS=Magnaporthe oryzae (strain 70-15 / ATCC MYA-4617 / FGSC 8958) GN=MGG_01326 PE=4 SV=1 - [G4MYL8_MAGO7]	29.51	1	16	19	95	759	759	85.2205	5.07178
G4MSH5	Uncharacterized protein OS=Magnaporthe oryzae (strain 70-15 / ATCC MYA-4617 / FGSC 8958) GN=MGG_15700 PE=3 SV=1 - [G4MSH5_MAGO7]	18.36	1	12	12	124	550	550	59.6104	6.55127
G4MY79	Eukaryotic translation initiation factor 2C 3 OS=Magnaporthe oryzae (strain Y34) GN=OOU_Y34scaffold00428g7 PE=4 SV=1 - [L7ID95_MAGOY]	26.53	3	24	24	99	1063	1063	115.308	9.70068
G4NBA2	Cell wall glucanosyltransferase OS=Magnaporthe oryzae (strain 70-15 / ATCC MYA-4617 / FGSC 8958) GN=MGG_00592 PE=4 SV=1 - [G4NBA2_MAGO7]	50.68	1	13	13	72	367	367	38.4189	6.80029
G4MMJ2	Coatomer subunit beta OS=Magnaporthe oryzae (strain P131) GN=OOW_P131scaffold01035g13 PE=4 SV=1 - [L7J3Z0_MAGOP]	24.95	1	21	21	86	958	958	106.148	5.74463
G4MUP5	Serine/threonine-protein phosphatase OS=Magnaporthe oryzae (strain 70-15 / ATCC MYA-4617 / FGSC 8958) GN=MGG_10195 PE=3 SV=1 - [G4MUP5_MAGO7]	43.04	2	10	11	74	309	309	35.6148	5.47803
G4MTI8	Minor allergen Alt a 7 OS=Magnaporthe oryzae (strain 70-15 / ATCC MYA-4617 / FGSC 8958) GN=MGG_01569 PE=4 SV=1 - [G4MTI8_MAGO7]	58.33	1	8	9	70	204	204	21.8058	5.85889
G4MT51	Proteasome subunit alpha type OS=Magnaporthe oryzae (strain 70-15 / ATCC MYA-4617 / FGSC 8958) GN=MGG_07130 PE=3 SV=1 - [G4MT51_MAGO7]	62.04	1	11	11	61	245	245	26.8773	4.85596
G4N024	Acidic ribosomal protein P1 OS=Magnaporthe oryzae PE=2 SV=1 - [D4NXB4_MAGOR]	72.48	1	4	4	33	109	109	11.0084	4.14502
G4MU14	Signal sequence receptor alpha chain OS=Magnaporthe oryzae (strain 70-15 / ATCC MYA-4617 / FGSC 8958) GN=MGG_07209 PE=4 SV=1 - [G4MU14_MAGO7]	38.2	1	7	7	57	267	267	28.5211	6.81494
G4MZI8	Ubiquitin-activating enzyme E1 1 OS=Magnaporthe oryzae (strain 70-15 / ATCC MYA-4617 / FGSC 8958) GN=MGG_01409 PE=3 SV=1 - [G4MZI8_MAGO7]	30.47	2	25	25	92	1037	1037	114.97	5.17334
G4N3J0	Carbonate dehydratase OS=Magnaporthe oryzae (strain P131) GN=OOW_P131scaffold00314g125 PE=4 SV=1 - [L7JH73_MAGOP]	32.72	1	7	7	65	272	272	29.8449	6.44287
G4NGY3	Importin alpha re-exporter OS=Magnaporthe oryzae (strain 70-15 / ATCC MYA-4617 / FGSC 8958) GN=MGG_03994 PE=4 SV=1 - [G4NGY3_MAGO7]	33.02	2	31	31	112	957	957	107.255	5.42725
G4NB71	Lactoylglutathione lyase OS=Magnaporthe oryzae (strain P131) GN=OOW_P131scaffold00267g37 PE=3 SV=1 - [L7JJ18_MAGOP]	47.3	2	11	11	60	315	315	36.1126	5.96045
G4N965	Uncharacterized protein OS=Magnaporthe oryzae (strain P131) GN=OOW_P131scaffold00459g30 PE=4 SV=1 - [L7JC14_MAGOP]	17.7	2	4	4	59	243	243	26.2254	7.60596
G4N931	Catalase OS=Magnaporthe oryzae (strain P131) GN=OOW_P131scaffold01546g17 PE=3 SV=1 - [L7IRZ1_MAGOP]	35.94	1	22	22	92	743	743	82.7048	6.53662
G4N9V9	Vacuolar ATP synthase subunit B OS=Magnaporthe oryzae (strain Y34) GN=OOU_Y34scaffold00765g63 PE=3 SV=1 - [L7HW26_MAGOY]	55.45	2	22	22	81	514	514	56.735	5.46533
G4NFR3	Uncharacterized protein OS=Magnaporthe oryzae (strain 70-15 / ATCC MYA-4617 / FGSC 8958) GN=MGG_08748 PE=4 SV=1 - [G4NFR3_MAGO7]	35.05	1	21	21	96	679	679	73.2836	5.04639
D4NXE7	40S ribosomal protein S1 OS=Magnaporthe oryzae (strain 70-15 / ATCC MYA-4617 / FGSC 8958) GN=RPS1 PE=2 SV=2 - [RS3A_MAGO7]	58.98	1	17	17	84	256	256	29.2569	10.0376
Q2KGE3	Nascent polypeptide-associated complex subunit beta OS=Magnaporthe oryzae (strain 70-15 / ATCC MYA-4617 / FGSC 8958) GN=MGCH7_ch7g392 PE=3 SV=1 - [Q2KGE3_MAGO7]	16.55	4	8	10	60	743	743	82.6842	7.00537
G4N9K0	Calpain-9 OS=Magnaporthe oryzae (strain 70-15 / ATCC MYA-4617 / FGSC 8958) GN=MGG_14872 PE=3 SV=1 - [G4N9K0_MAGO7]	23.21	2	16	16	55	797	797	90.3252	5.21143
G5EHM8	Nuclease domain-containing protein 1 OS=Magnaporthe oryzae (strain 70-15 / ATCC MYA-4617 / FGSC 8958) GN=MGCH7_ch7g348 PE=4 SV=1 - [G5EHM8_MAGO7]	39.04	2	29	30	78	894	894	98.4078	8.08936
G4NFS5	Carboxypeptidase 2 OS=Magnaporthe oryzae (strain 70-15 / ATCC MYA-4617 / FGSC 8958) GN=MGG_08736 PE=4 SV=1 - [G4NFS5_MAGO7]	35.58	3	14	14	67	520	520	56.6415	5.30029
G4MST7	NADPH dehydrogenase OS=Magnaporthe oryzae (strain 70-15 / ATCC MYA-4617 / FGSC 8958) GN=MGG_04569 PE=4 SV=1 - [G4MST7_MAGO7]	40.27	1	14	14	78	442	442	48.529	5.78271
G4NHM3	2,3-dihydroxybenzoic acid decarboxylase OS=Magnaporthe oryzae (strain 70-15 / ATCC MYA-4617 / FGSC 8958) GN=MGG_03793 PE=4 SV=1 - [G4NHM3_MAGO7]	43.95	1	11	11	78	339	339	38.8086	5.59229
G4NG95	GPI-anchored cell wall beta-1,3-endoglucanase EglC OS=Magnaporthe oryzae (strain 70-15 / ATCC MYA-4617 / FGSC 8958) GN=MGG_10400 PE=3 SV=1 - [G4NG95_MAGO7]	46.45	1	8	8	59	310	310	34.3431	5.04639
G4N7C6	Alpha-galactosidase OS=Magnaporthe oryzae (strain 70-15 / ATCC MYA-4617 / FGSC 8958) GN=MGG_03601 PE=4 SV=1 - [G4N7C6_MAGO7]	28.71	2	18	18	67	909	909	99.2421	6.1001
G4MKL3	Proline iminopeptidase OS=Magnaporthe oryzae (strain 70-15 / ATCC MYA-4617 / FGSC 8958) GN=MGG_15294 PE=4 SV=1 - [G4MKL3_MAGO7]	36.83	1	15	15	82	467	467	52.1915	5.88428
G4NDR4	Glycosyl hydrolase OS=Magnaporthe oryzae (strain 70-15 / ATCC MYA-4617 / FGSC 8958) GN=MGG_00882 PE=4 SV=1 - [G4NDR4_MAGO7]	30.67	1	17	17	72	776	776	86.8748	5.66846
G4MUS5	Multidrug resistance-associated protein 1 transporter OS=Magnaporthe oryzae (strain P131) GN=OOW_P131scaffold00336g19 PE=4 SV=1 - [L7JFT3_MAGOP]	20.44	3	27	27	77	1546	1546	171.751	8.25049
G4N3Y7	Beta-galactosidase OS=Magnaporthe oryzae (strain 70-15 / ATCC MYA-4617 / FGSC 8958) GN=MGG_05890 PE=3 SV=1 - [G4N3Y7_MAGO7]	28.87	3	26	26	87	1046	1046	117.385	5.79541
G4NLC8	40S ribosomal protein S9 OS=Magnaporthe oryzae (strain 70-15 / ATCC MYA-4617 / FGSC 8958) GN=MGG_02952 PE=4 SV=1 - [G4NLC8_MAGO7]	44.5	2	12	12	100	191	191	21.9091	10.3159
G4MTX0	Eukaryotic translation initiation factor 2 subunit gamma OS=Magnaporthe oryzae (strain P131) GN=OOW_P131scaffold00005g11 PE=4 SV=1 - [L7JSQ0_MAGOP]	48.34	1	21	21	117	513	513	55.5944	7.66455
G4NAD9	1,4-alpha-glucan-branching enzyme OS=Magnaporthe oryzae (strain 70-15 / ATCC MYA-4617 / FGSC 8958) GN=MGG_03186 PE=4 SV=1 - [G4NAD9_MAGO7]	42.55	2	24	24	92	691	691	79.0279	6.12549
G4N7Y7	Coatomer subunit alpha OS=Magnaporthe oryzae (strain P131) GN=OOW_P131scaffold01276g5 PE=4 SV=1 - [L7IXA5_MAGOP]	31.23	1	31	31	101	1220	1220	135.982	6.82959
G4NDY6	Uncharacterized protein OS=Magnaporthe oryzae (strain Y34) GN=OOU_Y34scaffold00126g47 PE=4 SV=1 - [L7IKV5_MAGOY]	67.34	1	10	10	54	199	199	21.8033	4.86865
G4N0J5	Proteasome subunit alpha type OS=Magnaporthe oryzae (strain 70-15 / ATCC MYA-4617 / FGSC 8958) GN=MGG_07727 PE=3 SV=1 - [G4N0J5_MAGO7]	39.73	2	12	12	76	292	292	31.7428	5.05908
G4MKD2	Alanine-glyoxylate aminotransferase 1 OS=Magnaporthe oryzae (strain Y34) GN=OOU_Y34scaffold00278g12 PE=4 SV=1 - [L7IDY7_MAGOY]	36.88	2	11	11	126	385	385	41.3724	7.04932
G4N348	Palmitoyl-protein thioesterase 1 OS=Magnaporthe oryzae (strain 70-15 / ATCC MYA-4617 / FGSC 8958) GN=MGG_04920 PE=4 SV=1 - [G4N348_MAGO7]	45.48	1	12	12	55	332	332	37.1615	5.18604
G5EI34	L-aminoadipate-semialdehyde dehydrogenase OS=Magnaporthe oryzae (strain 70-15 / ATCC MYA-4617 / FGSC 8958) GN=MGCH7_ch7g332 PE=3 SV=1 - [G5EI34_MAGO7]	29.21	1	25	25	77	1188	1188	131.153	6.01123
G4N9W9	40S ribosomal protein S6 OS=Magnaporthe oryzae (strain 70-15 / ATCC MYA-4617 / FGSC 8958) GN=MGG_03236 PE=3 SV=1 - [G4N9W9_MAGO7]	39.33	2	10	10	64	239	239	27.2859	10.5649
G4N0U4	Potassium-activated aldehyde dehydrogenase OS=Magnaporthe oryzae (strain 70-15 / ATCC MYA-4617 / FGSC 8958) GN=MGG_05814 PE=3 SV=1 - [G4N0U4_MAGO7]	39.57	1	18	18	98	470	470	51.0234	5.93506
G4N2W5	C-signal protein OS=Magnaporthe oryzae (strain P131) GN=OOW_P131scaffold01190g7 PE=3 SV=1 - [L7IZI4_MAGOP]	59.43	1	10	10	43	244	244	25.2399	6.0874
G4MVT6	Chitin synthase 1 OS=Magnaporthe oryzae GN=CHS1 PE=2 SV=1 - [G4XVB6_MAGOR]	25.4	1	20	20	74	929	929	104.108	7.88428
G4N7C7	Mitochondrial-processing peptidase subunit beta OS=Magnaporthe oryzae (strain 70-15 / ATCC MYA-4617 / FGSC 8958) GN=MGG_03600 PE=3 SV=1 - [G4N7C7_MAGO7]	43.76	1	19	19	102	473	473	52.2745	5.98584
A4R254	Vacuolar membrane protease OS=Magnaporthe oryzae (strain 70-15 / ATCC MYA-4617 / FGSC 8958) GN=MGG_06752 PE=3 SV=2 - [PFF1_MAGO7]	19.39	1	14	14	54	1011	1011	111.257	6.3667
G4MRB5	Ribosomal protein L19 OS=Magnaporthe oryzae PE=2 SV=1 - [D4NXF1_MAGOR]	42.11	2	8	8	71	190	190	22.0681	11.1802
G4NAY4	Heat shock protein SSB1 OS=Magnaporthe oryzae (strain 70-15 / ATCC MYA-4617 / FGSC 8958) GN=MGG_11513 PE=3 SV=1 - [G4NAY4_MAGO7]	37.3	1	18	18	59	614	614	66.6245	5.50342
G5EHN2	FAD binding domain-containing protein OS=Magnaporthe oryzae (strain 70-15 / ATCC MYA-4617 / FGSC 8958) GN=MGCH7_ch7g678 PE=4 SV=1 - [G5EHN2_MAGO7]	25.63	1	11	11	58	515	515	56.6961	6.04932
G4MQU0	Bilirubin oxidase OS=Magnaporthe oryzae (strain 70-15 / ATCC MYA-4617 / FGSC 8958) GN=MGG_13764 PE=4 SV=1 - [G4MQU0_MAGO7]	44.36	1	21	21	74	629	629	70.1321	5.70654
G4ML54	60S ribosomal protein L27-A OS=Magnaporthe oryzae (strain 70-15 / ATCC MYA-4617 / FGSC 8958) GN=MGG_06693 PE=4 SV=1 - [G4ML54_MAGO7]	40.74	2	7	7	79	135	135	15.7257	10.5356
G4NIB4	Peptide hydrolase OS=Magnaporthe oryzae (strain 70-15 / ATCC MYA-4617 / FGSC 8958) GN=MGG_14292 PE=3 SV=1 - [G4NIB4_MAGO7]	21.78	3	8	8	34	551	551	58.6936	5.21143
G4NCQ6	40S ribosomal protein S13 OS=Magnaporthe oryzae (strain 70-15 / ATCC MYA-4617 / FGSC 8958) GN=MGG_00349 PE=3 SV=1 - [G4NCQ6_MAGO7]	49.01	1	7	7	113	151	151	16.8443	10.3452
G4MTK2	Argininosuccinate synthase OS=Magnaporthe oryzae (strain 70-15 / ATCC MYA-4617 / FGSC 8958) GN=MGG_15868 PE=3 SV=1 - [G4MTK2_MAGO7]	42.65	3	15	15	90	415	415	46.6226	5.47803
A4RM69	Eukaryotic translation initiation factor 3 subunit A OS=Magnaporthe oryzae (strain 70-15 / ATCC MYA-4617 / FGSC 8958) GN=TIF32 PE=3 SV=1 - [EIF3A_MAGO7]	28.15	1	28	28	111	1073	1073	122.062	9.45166
G4NG27	Uncharacterized protein OS=Magnaporthe oryzae (strain 70-15 / ATCC MYA-4617 / FGSC 8958) GN=MGG_17595 PE=4 SV=1 - [G4NG27_MAGO7]	44.99	3	16	16	68	509	509	55.9638	6.06201
G4NIS3	Aminotransferase OS=Magnaporthe oryzae (strain P131) GN=OOW_P131scaffold00751g19 PE=4 SV=1 - [L7J7I7_MAGOP]	37.21	2	11	12	66	473	473	51.9523	5.89697
A4QSX4	Eukaryotic translation initiation factor 3 subunit C OS=Magnaporthe oryzae (strain 70-15 / ATCC MYA-4617 / FGSC 8958) GN=NIP1 PE=3 SV=1 - [EIF3C_MAGO7]	34.34	1	25	25	79	865	865	97.0098	5.23682
Q2KGM0	Carbonic anhydrase OS=Magnaporthe oryzae (strain 70-15 / ATCC MYA-4617 / FGSC 8958) GN=MGCH7_ch7g315 PE=3 SV=1 - [Q2KGM0_MAGO7]	55.22	2	12	12	66	230	230	26.0894	6.78564
G4MT35	NADPH--cytochrome P450 reductase OS=Magnaporthe oryzae (strain 70-15 / ATCC MYA-4617 / FGSC 8958) GN=cprA PE=3 SV=1 - [G4MT35_MAGO7]	35.51	1	19	19	66	690	690	76.8477	5.2876
G4N188	Uncharacterized protein OS=Magnaporthe oryzae (strain 70-15 / ATCC MYA-4617 / FGSC 8958) GN=MGG_07470 PE=4 SV=1 - [G4N188_MAGO7]	38.75	1	17	17	73	609	609	68.9213	7.09326
G4N700	40S ribosomal protein S12 OS=Magnaporthe oryzae (strain 70-15 / ATCC MYA-4617 / FGSC 8958) GN=MGG_06480 PE=3 SV=1 - [G4N700_MAGO7]	49.66	1	7	7	82	147	147	16.1901	5.021
G4NBY3	Proteasome subunit alpha type OS=Magnaporthe oryzae (strain 70-15 / ATCC MYA-4617 / FGSC 8958) GN=MGG_01153 PE=3 SV=1 - [G4NBY3_MAGO7]	49.21	1	12	12	64	254	254	28.0662	6.37939
G4N9V2	40S ribosomal protein S8 OS=Magnaporthe oryzae (strain 70-15 / ATCC MYA-4617 / FGSC 8958) GN=MGG_03251 PE=3 SV=1 - [G4N9V2_MAGO7]	31.68	1	6	6	48	202	202	22.8011	10.7114
G4N9Y2	Cytochrome b-c1 complex subunit 2 OS=Magnaporthe oryzae (strain 70-15 / ATCC MYA-4617 / FGSC 8958) GN=MGG_03226 PE=4 SV=1 - [G4N9Y2_MAGO7]	29.37	2	10	10	50	463	463	48.1993	7.78174
G4N5C8	Ribosomal protein S14.e OS=Magnaporthe oryzae PE=2 SV=1 - [D4NXE4_MAGOR]	66	2	8	8	70	150	150	16.0605	10.6675
G4N701	40S ribosomal protein S22 OS=Magnaporthe oryzae (strain 70-15 / ATCC MYA-4617 / FGSC 8958) GN=MGG_06479 PE=3 SV=1 - [G4N701_MAGO7]	50	1	6	6	66	130	130	14.731	10.0962
G5EH03	Isocitrate lyase OS=Magnaporthe oryzae (strain 70-15 / ATCC MYA-4617 / FGSC 8958) GN=MGCH7_ch7g337 PE=3 SV=1 - [G5EH03_MAGO7]	37.89	1	16	16	74	607	607	66.7024	7.81104
G4MNP5	Maltose O-acetyltransferase OS=Magnaporthe oryzae (strain 70-15 / ATCC MYA-4617 / FGSC 8958) GN=MGG_02103 PE=4 SV=1 - [G4MNP5_MAGO7]	42.01	1	8	8	62	219	219	24.0443	5.2749
G4MND6	Putative nucleosome assembly protein Yco6 OS=Magnaporthe oryzae PE=2 SV=1 - [E9P5E0_MAGOR]	39.85	2	13	13	58	404	404	45.8241	4.48779
G4N5G7	Alcohol oxidase OS=Magnaporthe oryzae (strain P131) GN=OOW_P131scaffold01600g4 PE=4 SV=1 - [L7IRG9_MAGOP]	51.03	3	28	28	119	678	678	75.4204	7.13721
G4NE42	Proteasome subunit beta type OS=Magnaporthe oryzae (strain 70-15 / ATCC MYA-4617 / FGSC 8958) GN=MGG_00170 PE=3 SV=1 - [G4NE42_MAGO7]	36.97	2	9	9	61	284	284	31.2154	6.52197
G4NFI7	2,5-diketo-D-gluconic acid reductase A OS=Magnaporthe oryzae (strain P131) GN=OOW_P131scaffold01517g10 PE=4 SV=1 - [L7IU28_MAGOP]	58.68	1	14	14	74	288	288	31.9651	5.87158
G5EHM3	MFP1 OS=Magnaporthe oryzae GN=MFP1 PE=2 SV=1 - [B9VVP3_MAGOR]	32.66	3	8	8	44	349	349	35.8269	7.57666
G4MZQ6	60S ribosomal protein L5 OS=Magnaporthe oryzae (strain 70-15 / ATCC MYA-4617 / FGSC 8958) GN=MGG_07048 PE=3 SV=1 - [G4MZQ6_MAGO7]	24.5	1	7	7	39	302	302	34.4837	8.104
A4R6K8	Phosphatidylinositol transfer protein SFH5 OS=Magnaporthe oryzae (strain 70-15 / ATCC MYA-4617 / FGSC 8958) GN=SFH5 PE=3 SV=1 - [SFH5_MAGO7]	48.03	2	15	15	62	406	406	42.9108	5.17334
G4MSC1	Dipeptidyl-peptidase 3 OS=Magnaporthe oryzae (strain P131) GN=OOW_P131scaffold01358g14 PE=4 SV=1 - [L7IVP9_MAGOP]	39.27	2	22	22	67	713	713	79.1443	5.5542
G4MMY9	Probable ribosomal protein L12 OS=Magnaporthe oryzae PE=2 SV=1 - [D4NXI6_MAGOR]	53.94	2	7	7	59	165	165	17.7067	9.40771
G5EHE9	Dolichyl-diphosphooligosaccharide--protein glycosyltransferase subunit WBP1 OS=Magnaporthe oryzae (strain 70-15 / ATCC MYA-4617 / FGSC 8958) GN=MGCH7_ch7g576 PE=3 SV=1 - [G5EHE9_MAGO7]	41.42	1	14	14	73	466	466	51.6438	7.1958
G4NLU9	Hsp70-like protein OS=Magnaporthe oryzae (strain 70-15 / ATCC MYA-4617 / FGSC 8958) GN=MGG_02842 PE=3 SV=1 - [G4NLU9_MAGO7]	48.78	2	20	20	81	572	572	61.0151	4.97021
G4NFW5	Alpha-1,2 mannosyltransferase KTR1 OS=Magnaporthe oryzae (strain 70-15 / ATCC MYA-4617 / FGSC 8958) GN=MGG_08692 PE=4 SV=1 - [G4NFW5_MAGO7]	27.17	1	11	11	64	438	438	51.1667	6.12549
G4N933	Gelsolin repeat-containing protein OS=Magnaporthe oryzae (strain P131) GN=OOW_P131scaffold01546g15 PE=4 SV=1 - [L7ITT9_MAGOP]	41.55	1	14	14	45	426	426	48.3572	5.68115
G4N2B6	Protein transporter SEC61 subunit alpha OS=Magnaporthe oryzae (strain 70-15 / ATCC MYA-4617 / FGSC 8958) GN=MGG_04856 PE=3 SV=1 - [G4N2B6_MAGO7]	19.12	1	9	9	78	476	476	52.3242	8.08936
G4ND68	Dihydrodipicolinate synthase OS=Magnaporthe oryzae (strain 70-15 / ATCC MYA-4617 / FGSC 8958) GN=MGG_00956 PE=4 SV=1 - [G4ND68_MAGO7]	59.45	1	13	13	76	328	328	35.0222	6.52197
G4NFQ1	Peptide hydrolase OS=Magnaporthe oryzae (strain P131) GN=OOW_P131scaffold01623g7 PE=3 SV=1 - [L7ISZ4_MAGOP]	11.54	1	5	5	61	494	494	53.2587	5.45264
G4NDL6	40S ribosomal protein S7 OS=Magnaporthe oryzae PE=2 SV=1 - [D4NXG1_MAGOR]	52.22	1	8	8	57	203	203	23.1245	10.228
G5EHN4	Histone H4 OS=Magnaporthe oryzae (strain 70-15 / ATCC MYA-4617 / FGSC 8958) GN=MGG_01160 PE=3 SV=1 - [G5EHN4_MAGO7]	50.49	1	5	5	61	103	103	11.3494	11.356
G4MUC5	UTP-glucose-1-phosphate uridylyltransferase OS=Magnaporthe oryzae (strain P131) GN=OOW_P131scaffold01287g47 PE=4 SV=1 - [L7IZ15_MAGOP]	49.15	1	20	20	85	529	529	58.7393	6.81494
G4MZP6	Epsilon-COP OS=Magnaporthe oryzae (strain P131) GN=OOW_P131scaffold00323g40 PE=4 SV=1 - [L7JID5_MAGOP]	50.51	1	10	10	55	297	297	31.4465	4.91943
G4N1Z1	Uncharacterized protein OS=Magnaporthe oryzae (strain 70-15 / ATCC MYA-4617 / FGSC 8958) GN=MGG_07871 PE=4 SV=1 - [G4N1Z1_MAGO7]	50.62	1	7	7	66	241	241	26.5093	6.03662
G4N4N6	S-(hydroxymethyl)glutathione dehydrogenase OS=Magnaporthe oryzae (strain P131) GN=OOW_P131scaffold00463g17 PE=3 SV=1 - [L7JBT2_MAGOP]	38.58	1	13	13	46	381	381	40.4065	6.88818
G4N601	6-phosphogluconolactonase OS=Magnaporthe oryzae (strain P131) GN=OOW_P131scaffold01296g15 PE=4 SV=1 - [L7IXQ5_MAGOP]	49.77	1	18	18	65	428	428	45.0133	8.83643
G4NLS3	Uncharacterized protein OS=Magnaporthe oryzae (strain P131) GN=OOW_P131scaffold01019g4 PE=4 SV=1 - [L7J4H1_MAGOP]	36.76	2	28	28	89	974	974	105.212	5.77002
G4N2S6	Methyltransferase OS=Magnaporthe oryzae (strain 70-15 / ATCC MYA-4617 / FGSC 8958) GN=MGG_04901 PE=3 SV=1 - [G4N2S6_MAGO7]	44.41	1	11	11	57	340	340	37.555	5.88428
A4R640	Leucine aminopeptidase 1 OS=Magnaporthe oryzae (strain 70-15 / ATCC MYA-4617 / FGSC 8958) GN=LAP1 PE=3 SV=1 - [LAP1_MAGO7]	19.7	2	6	6	47	401	401	44.7265	5.64307
P58371	Subtilisin-like proteinase Spm1 OS=Magnaporthe oryzae (strain 70-15 / ATCC MYA-4617 / FGSC 8958) GN=SPM1 PE=3 SV=1 - [SPM1_MAGO7]	34.33	1	13	13	68	536	536	57.1347	6.69775
G4N8K5	Uncharacterized protein OS=Magnaporthe oryzae (strain 70-15 / ATCC MYA-4617 / FGSC 8958) GN=MGG_13563 PE=4 SV=1 - [G4N8K5_MAGO7]	43.43	2	5	5	52	175	175	19.3629	6.32861
G5EHV3	V-type proton ATPase subunit E OS=Magnaporthe oryzae (strain 70-15 / ATCC MYA-4617 / FGSC 8958) GN=MGCH7_ch7g520 PE=3 SV=1 - [G5EHV3_MAGO7]	58.26	1	11	11	40	230	230	25.8045	8.6167
G4NIW1	Isoamyl alcohol oxidase OS=Magnaporthe oryzae (strain 70-15 / ATCC MYA-4617 / FGSC 8958) GN=MGG_02818 PE=4 SV=1 - [G4NIW1_MAGO7]	15.42	3	8	8	72	603	603	65.0722	6.69775
G4MY07	Uncharacterized protein OS=Magnaporthe oryzae (strain 70-15 / ATCC MYA-4617 / FGSC 8958) GN=MGG_15402 PE=4 SV=1 - [G4MY07_MAGO7]	42.12	3	16	16	59	584	584	61.878	6.84424
Q9UWF0	Calmodulin OS=Magnaporthe oryzae (strain 70-15 / ATCC MYA-4617 / FGSC 8958) GN=CMD1 PE=3 SV=4 - [CALM_MAGO7]	59.73	16	6	9	52	149	149	16.9859	4.27197
G4NCJ9	26S proteasome regulatory subunit rpn-8 OS=Magnaporthe oryzae (strain 70-15 / ATCC MYA-4617 / FGSC 8958) GN=MGG_01059 PE=4 SV=1 - [G4NCJ9_MAGO7]	65.55	1	17	17	69	357	357	39.2672	5.74463
G4N783	Glutathione synthetase OS=Magnaporthe oryzae (strain 70-15 / ATCC MYA-4617 / FGSC 8958) GN=MGG_06454 PE=3 SV=1 - [G4N783_MAGO7]	37.43	1	17	17	74	553	553	60.3806	6.22705
G4N5L7	Eukaryotic translation initiation factor 2 subunit alpha OS=Magnaporthe oryzae (strain 70-15 / ATCC MYA-4617 / FGSC 8958) GN=MGG_13200 PE=4 SV=1 - [G4N5L7_MAGO7]	50	2	13	13	60	310	310	35.1441	5.36377
G5EHJ4	Uncharacterized protein OS=Magnaporthe oryzae (strain 70-15 / ATCC MYA-4617 / FGSC 8958) GN=MGCH7_ch7g454 PE=4 SV=1 - [G5EHJ4_MAGO7]	76.62	1	11	11	60	154	154	18.236	5.70654
G4NI96	Uncharacterized protein OS=Magnaporthe oryzae (strain 70-15 / ATCC MYA-4617 / FGSC 8958) GN=MGG_17820 PE=4 SV=1 - [G4NI96_MAGO7]	29.55	1	2	7	39	308	308	33.9158	5.41455
G4MMA9	Acetylornithine deacetylase OS=Magnaporthe oryzae (strain 70-15 / ATCC MYA-4617 / FGSC 8958) GN=MGG_01970 PE=4 SV=1 - [G4MMA9_MAGO7]	38.07	2	11	11	49	436	436	47.3018	5.77002
G4MQU2	Uncharacterized protein OS=Magnaporthe oryzae (strain 70-15 / ATCC MYA-4617 / FGSC 8958) GN=MGG_04757 PE=4 SV=1 - [G4MQU2_MAGO7]	23.28	1	8	8	36	494	494	53.024	5.22412
Q96X22	4-hydroxyphenylpyruvate dioxygenase OS=Magnaporthe oryzae (strain 70-15 / ATCC MYA-4617 / FGSC 8958) GN=HPD4 PE=3 SV=1 - [HPPD_MAGO7]	41.53	1	15	15	82	419	419	47.5466	5.69385
G4MR50	Uncharacterized protein OS=Magnaporthe oryzae (strain 70-15 / ATCC MYA-4617 / FGSC 8958) GN=MGG_09900 PE=4 SV=1 - [G4MR50_MAGO7]	48.24	1	6	6	56	199	199	21.9938	5.43994
G4MKI2	Dihydroxy-acid dehydratase, mitochondrial OS=Magnaporthe oryzae (strain P131) GN=OOW_P131scaffold00074g17 PE=3 SV=1 - [L7JPJ5_MAGOP]	31.82	2	17	17	80	594	594	63.4014	7.40088
G4N5C7	60S ribosomal protein L7 OS=Magnaporthe oryzae (strain 70-15 / ATCC MYA-4617 / FGSC 8958) GN=MGG_05237 PE=4 SV=1 - [G4N5C7_MAGO7]	47.98	2	12	12	95	248	248	28.7697	10.0229
G4N5A0	Serine/threonine-protein phosphatase OS=Magnaporthe oryzae PE=2 SV=1 - [G0Z6F4_MAGOR]	26.83	1	6	6	42	328	328	37.3001	4.93213
G4MMM6	Carboxypeptidase 2 OS=Magnaporthe oryzae (strain 70-15 / ATCC MYA-4617 / FGSC 8958) GN=MGG_05539 PE=4 SV=1 - [G4MMM6_MAGO7]	32.79	2	12	12	57	549	549	59.9403	5.88428
G4MRJ2	60S ribosomal protein L33-B OS=Magnaporthe oryzae (strain 70-15 / ATCC MYA-4617 / FGSC 8958) GN=MGG_09927 PE=4 SV=1 - [G4MRJ2_MAGO7]	60.55	2	7	7	68	109	109	12.3366	10.8433
G4MYZ8	Uncharacterized protein OS=Magnaporthe oryzae (strain 70-15 / ATCC MYA-4617 / FGSC 8958) GN=MGG_15527 PE=3 SV=1 - [G4MYZ8_MAGO7]	54.28	1	13	13	57	339	339	36.0499	7.25439
G4N7Q6	Importin subunit beta-3 OS=Magnaporthe oryzae (strain 70-15 / ATCC MYA-4617 / FGSC 8958) GN=MGG_03537 PE=4 SV=1 - [G4N7Q6_MAGO7]	16.3	3	14	14	40	1098	1098	121.83	4.80518
G4NCA7	Homogentisate 1,2-dioxygenase OS=Magnaporthe oryzae (strain 70-15 / ATCC MYA-4617 / FGSC 8958) GN=MGG_00431 PE=4 SV=1 - [G4NCA7_MAGO7]	60.44	1	2	18	85	503	503	54.9771	6.40479
G4N069	Flavoprotein oxygenase OS=Magnaporthe oryzae (strain P131) GN=OOW_P131scaffold00193g3 PE=4 SV=1 - [L7JLK3_MAGOP]	42.42	2	11	11	78	297	297	31.9041	6.1001
G4N3V2	40S ribosomal protein S19 OS=Magnaporthe oryzae (strain 70-15 / ATCC MYA-4617 / FGSC 8958) GN=MGG_05026 PE=4 SV=1 - [G4N3V2_MAGO7]	42.76	1	6	6	56	152	152	16.9947	7.63525
G4N3Y5	Uncharacterized protein OS=Magnaporthe oryzae (strain 70-15 / ATCC MYA-4617 / FGSC 8958) GN=MGG_05888 PE=4 SV=1 - [G4N3Y5_MAGO7]	68.67	1	25	25	73	399	399	45.0467	5.75732
G4N684	Putative uncharacterized protein OS=Magnaporthe oryzae PE=2 SV=1 - [D4NXI8_MAGOR]	53.68	1	12	12	46	326	326	35.0809	5.03369
G4MVL8	Triosephosphate isomerase OS=Magnaporthe oryzae (strain 70-15 / ATCC MYA-4617 / FGSC 8958) GN=MGG_08905 PE=3 SV=1 - [G4MVL8_MAGO7]	50.4	2	10	10	56	250	250	27.0759	5.96045
G4MWF3	Proteasome subunit alpha type OS=Magnaporthe oryzae (strain 70-15 / ATCC MYA-4617 / FGSC 8958) GN=MGG_08343 PE=3 SV=1 - [G4MWF3_MAGO7]	48.61	1	9	9	41	251	251	27.895	6.55127
G4NGR9	Mannosyl-oligosaccharide glucosidase OS=Magnaporthe oryzae (strain P131) GN=OOW_P131scaffold01683g24 PE=4 SV=1 - [L7IRH5_MAGOP]	32.56	1	20	20	67	823	823	93.4455	5.45264
G4ML12	Neutral alpha-glucosidase AB OS=Magnaporthe oryzae (strain 70-15 / ATCC MYA-4617 / FGSC 8958) GN=MGG_08623 PE=3 SV=1 - [G4ML12_MAGO7]	27.35	2	23	23	75	980	980	110.621	6.27783
G4NCJ7	Coproporphyrinogen III oxidase OS=Magnaporthe oryzae (strain 70-15 / ATCC MYA-4617 / FGSC 8958) GN=MGG_01061 PE=4 SV=1 - [G4NCJ7_MAGO7]	37.32	1	15	15	73	418	418	47.2496	8.1333
G4MTF2	PyrABCN OS=Magnaporthe oryzae (strain 70-15 / ATCC MYA-4617 / FGSC 8958) GN=MGG_01537 PE=3 SV=1 - [G4MTF2_MAGO7]	15.8	2	29	29	86	2241	2241	246.594	6.52197
G4MTS9	Oligosaccharyl transferase STT3 subunit OS=Magnaporthe oryzae (strain 70-15 / ATCC MYA-4617 / FGSC 8958) GN=MGG_04773 PE=4 SV=1 - [G4MTS9_MAGO7]	19.33	1	13	13	62	750	750	83.6248	8.5874
G4MLE9	Farnesyl pyrophosphate synthetase OS=Magnaporthe oryzae (strain P131) GN=OOW_P131scaffold00367g34 PE=3 SV=1 - [L7JEL9_MAGOP]	49.43	1	16	16	90	348	348	40.0663	5.10986
G4MR15	Uncharacterized protein OS=Magnaporthe oryzae (strain 70-15 / ATCC MYA-4617 / FGSC 8958) GN=MGG_02386 PE=4 SV=1 - [G4MR15_MAGO7]	48.02	1	14	14	73	354	354	38.3303	6.46826
G4N189	Uncharacterized protein OS=Magnaporthe oryzae (strain 70-15 / ATCC MYA-4617 / FGSC 8958) GN=MGG_07471 PE=3 SV=1 - [G4N189_MAGO7]	34.29	2	7	7	33	210	210	23.515	8.22119
G4MZB3	Uncharacterized protein OS=Magnaporthe oryzae (strain P131) GN=OOW_P131scaffold01075g25 PE=4 SV=1 - [L7J3M9_MAGOP]	53.56	2	14	14	62	323	323	35.8952	6.23975
G4MXS1	Pyruvate kinase OS=Magnaporthe oryzae (strain 70-15 / ATCC MYA-4617 / FGSC 8958) GN=MGG_08063 PE=3 SV=1 - [G4MXS1_MAGO7]	38.07	1	16	16	67	528	528	58.0084	6.56592
G4MY14	Peptidyl-prolyl cis-trans isomerase OS=Magnaporthe oryzae (strain P131) GN=OOW_P131scaffold00351g6 PE=3 SV=1 - [L7JF43_MAGOP]	51.52	2	6	7	43	165	165	17.834	8.6167
G4MUJ0	Uncharacterized protein OS=Magnaporthe oryzae (strain P131) GN=OOW_P131scaffold00421g9 PE=4 SV=1 - [L7JD76_MAGOP]	56.56	2	16	16	69	366	366	40.1959	5.88428
G4N9A6	Periplasmic beta-glucosidase/beta-xylosidase OS=Magnaporthe oryzae (strain P131) GN=OOW_P131scaffold00981g6 PE=4 SV=1 - [L7J5U3_MAGOP]	37.52	1	17	20	80	621	621	68.3229	5.18604
G4NAT3	2-oxoglutarate dehydrogenase OS=Magnaporthe oryzae (strain 70-15 / ATCC MYA-4617 / FGSC 8958) GN=MGG_12767 PE=4 SV=1 - [G4NAT3_MAGO7]	37.6	1	28	28	87	1008	1008	114.111	7.00537
G4N763	Proteasome subunit alpha type OS=Magnaporthe oryzae (strain 70-15 / ATCC MYA-4617 / FGSC 8958) GN=MGG_06472 PE=3 SV=1 - [G4N763_MAGO7]	51.3	2	11	11	64	269	269	29.3382	7.84033
G4MUJ2	Isocitrate dehydrogenase [NADP] OS=Magnaporthe oryzae (strain P131) GN=OOW_P131scaffold00421g7 PE=3 SV=1 - [L7JF20_MAGOP]	46	1	21	21	72	450	450	50.691	8.67529
G4NHU5	Elongation factor 3 OS=Magnaporthe oryzae (strain P131) GN=OOW_P131scaffold00348g6 PE=4 SV=1 - [L7JF42_MAGOP]	20.38	1	16	16	65	1055	1055	117.116	6.31592
G4N9T5	Endonuclease/exonuclease/phosphatase OS=Magnaporthe oryzae (strain 70-15 / ATCC MYA-4617 / FGSC 8958) GN=MGG_10669 PE=4 SV=1 - [G4N9T5_MAGO7]	34.95	1	13	13	68	618	618	65.7404	4.98291
G4MQC3	Beta-xylosidase OS=Magnaporthe oryzae (strain 70-15 / ATCC MYA-4617 / FGSC 8958) GN=MGG_14303 PE=3 SV=1 - [G4MQC3_MAGO7]	35.9	3	12	12	62	546	546	62.2105	5.78271
G4MKS2	Hsp90 associated co-chaperone OS=Magnaporthe oryzae PE=2 SV=1 - [D4NXC9_MAGOR]	36.36	1	5	5	52	209	209	22.9719	4.58936
G4MY85	L-galactonate dehydratase OS=Magnaporthe oryzae (strain 70-15 / ATCC MYA-4617 / FGSC 8958) GN=MGG_01300 PE=4 SV=1 - [G4MY85_MAGO7]	41.15	3	14	14	65	452	452	50.0784	5.93506
G4N0F7	Inorganic phosphate transport protein PHO88 OS=Magnaporthe oryzae (strain P131) GN=OOW_P131scaffold00365g9 PE=4 SV=1 - [L7JGN6_MAGOP]	52.75	2	7	7	65	182	182	19.7185	9.56885
G4NGZ4	Actin OS=Magnaporthe oryzae (strain 70-15 / ATCC MYA-4617 / FGSC 8958) GN=MGG_03982 PE=3 SV=1 - [G4NGZ4_MAGO7]	45.07	7	14	14	78	375	375	41.6539	5.69385
G4MRF6	Erythrocyte band 7 integral membrane protein OS=Magnaporthe oryzae (strain P131) GN=OOW_P131scaffold00135g1 PE=4 SV=1 - [L7JNH2_MAGOP]	33.61	1	12	12	79	360	360	39.0909	7.00537
G4MPK6	Cytochrome c1 OS=Magnaporthe oryzae (strain 70-15 / ATCC MYA-4617 / FGSC 8958) GN=MGG_16462 PE=4 SV=1 - [G4MPK6_MAGO7]	36.73	3	8	8	51	324	324	35.6589	7.44482
G4MU67	Aminomethyltransferase OS=Magnaporthe oryzae (strain 70-15 / ATCC MYA-4617 / FGSC 8958) GN=MGG_04826 PE=3 SV=1 - [G4MU67_MAGO7]	52.16	1	1	16	65	464	464	49.8301	9.27588
G4N6M6	Tryptophan synthase OS=Magnaporthe oryzae (strain P131) GN=OOW_P131scaffold00082g26 PE=3 SV=1 - [L7JPZ2_MAGOP]	18.97	1	11	11	37	717	717	76.8072	6.3667
G4MYJ0	40S ribosomal protein S15 OS=Magnaporthe oryzae PE=2 SV=1 - [D4NXI1_MAGOR]	35.95	1	4	4	35	153	153	17.5545	10.0669
G5EHZ3	Isovaleryl-CoA dehydrogenase 2 OS=Magnaporthe oryzae (strain 70-15 / ATCC MYA-4617 / FGSC 8958) GN=MGCH7_ch7g256 PE=3 SV=1 - [G5EHZ3_MAGO7]	31.91	1	12	12	56	470	470	50.4397	7.31299
G4N6K7	Tartrate dehydrogenase/decarboxylase ttuC OS=Magnaporthe oryzae (strain 70-15 / ATCC MYA-4617 / FGSC 8958) GN=MGG_06547 PE=4 SV=1 - [G4N6K7_MAGO7]	35.83	3	10	10	54	360	360	39.1799	5.73193
G4N7Z0	Beta-glucosidase cel3A OS=Magnaporthe oryzae (strain 70-15 / ATCC MYA-4617 / FGSC 8958) GN=cel3B PE=1 SV=1 - [CEL3B_MAGO7]	25.49	2	13	13	82	765	765	82.7619	5.42725
G4MKI0	SnodProt1 OS=Magnaporthe oryzae (strain 70-15 / ATCC MYA-4617 / FGSC 8958) GN=MGG_05344 PE=4 SV=1 - [G4MKI0_MAGO7]	54.74	1	4	4	35	137	137	14.1958	4.88135
G4N300	Amino acid transporter OS=Magnaporthe oryzae (strain P131) GN=OOW_P131scaffold01139g1 PE=3 SV=1 - [L7J206_MAGOP]	36.44	1	13	13	64	505	505	54.6125	5.93506
G4N2L8	Acetyl-CoA carboxylase OS=Magnaporthe oryzae (strain 70-15 / ATCC MYA-4617 / FGSC 8958) GN=MGG_07613 PE=4 SV=1 - [G4N2L8_MAGO7]	20.14	1	41	41	79	2344	2344	261.936	6.58057
G4NII3	AAA family ATPase OS=Magnaporthe oryzae (strain 70-15 / ATCC MYA-4617 / FGSC 8958) GN=MGG_09830 PE=4 SV=1 - [G4NII3_MAGO7]	12.81	1	12	12	41	1046	1046	116.937	8.67529
G4MZK6	Uncharacterized protein OS=Magnaporthe oryzae (strain 70-15 / ATCC MYA-4617 / FGSC 8958) GN=MGG_01423 PE=4 SV=1 - [G4MZK6_MAGO7]	28.08	2	7	7	48	260	260	28.5553	7.37158
G4N042	Translocation protein sec63 OS=Magnaporthe oryzae (strain P131) GN=OOW_P131scaffold00095g22 PE=4 SV=1 - [L7JP36_MAGOP]	25	1	15	15	60	704	704	78.4039	5.21143
G4MT38	26S proteasome regulatory subunit rpn-1 OS=Magnaporthe oryzae (strain 70-15 / ATCC MYA-4617 / FGSC 8958) GN=MGG_07120 PE=4 SV=1 - [G4MT38_MAGO7]	26.76	2	19	19	70	897	897	99.5808	5.0083
G4NHF6	Uncharacterized protein OS=Magnaporthe oryzae (strain 70-15 / ATCC MYA-4617 / FGSC 8958) GN=MGG_03858 PE=4 SV=1 - [G4NHF6_MAGO7]	35.21	1	15	15	52	551	551	60.3495	5.30029
A4QZL9	Eukaryotic translation initiation factor 3 subunit B OS=Magnaporthe oryzae (strain 70-15 / ATCC MYA-4617 / FGSC 8958) GN=PRT1 PE=3 SV=1 - [EIF3B_MAGO7]	20.51	1	13	13	70	746	746	85.7057	5.08447
G4NAT5	Dihydrolipoyllysine-residue succinyltransferase OS=Magnaporthe oryzae (strain 70-15 / ATCC MYA-4617 / FGSC 8958) GN=MGG_03149 PE=4 SV=1 - [G4NAT5_MAGO7]	33.02	1	14	14	58	421	421	46.5293	8.51416
G4N8V7	Isotrichodermin C-15 hydroxylase OS=Magnaporthe oryzae (strain 70-15 / ATCC MYA-4617 / FGSC 8958) GN=MGG_03375 PE=3 SV=1 - [G4N8V7_MAGO7]	41.6	10	21	21	84	524	524	58.5613	7.50342
G4N6P9	Casein kinase II subunit alpha OS=Magnaporthe oryzae (strain P131) GN=OOW_P131scaffold01168g44 PE=3 SV=1 - [L7J0C6_MAGOP]	52.96	2	14	14	62	338	338	39.4642	7.02002
G4MKM5	Valyl-tRNA synthetase OS=Magnaporthe oryzae (strain 70-15 / ATCC MYA-4617 / FGSC 8958) GN=MGG_04396 PE=3 SV=1 - [G4MKM5_MAGO7]	25.48	1	1	23	69	1099	1099	123.237	6.69775
G4NF62	Acetyl esterase OS=Magnaporthe oryzae (strain 70-15 / ATCC MYA-4617 / FGSC 8958) GN=MGG_04194 PE=4 SV=1 - [G4NF62_MAGO7]	18.29	1	3	3	30	350	350	38.4725	4.80518
G4MSA3	60S ribosomal protein L18 OS=Magnaporthe oryzae PE=2 SV=1 - [D4NXG4_MAGOR]	39.67	1	6	6	54	184	184	20.6616	11.6343
G4NB83	Tubulin beta chain OS=Magnaporthe oryzae (strain 70-15 / ATCC MYA-4617 / FGSC 8958) GN=MGG_00604 PE=3 SV=1 - [G4NB83_MAGO7]	24.83	22	4	9	51	447	447	49.8779	4.86865
G4NEG7	Uncharacterized protein OS=Magnaporthe oryzae (strain 70-15 / ATCC MYA-4617 / FGSC 8958) GN=MGG_00110 PE=4 SV=1 - [G4NEG7_MAGO7]	42.58	1	14	14	50	357	357	40.696	9.12939
G4N5S2	Uncharacterized protein OS=Magnaporthe oryzae (strain 70-15 / ATCC MYA-4617 / FGSC 8958) GN=MGG_05307 PE=4 SV=1 - [G4N5S2_MAGO7]	23.73	2	6	6	29	316	316	33.5209	9.43701
G4N5Q4	40S ribosomal protein S16 OS=Magnaporthe oryzae (strain 70-15 / ATCC MYA-4617 / FGSC 8958) GN=MGG_12892 PE=3 SV=1 - [G4N5Q4_MAGO7]	60.42	3	9	9	60	144	144	16.1337	10.1987
G4MQZ2	Mitochondrial phosphate carrier protein OS=Magnaporthe oryzae (strain 70-15 / ATCC MYA-4617 / FGSC 8958) GN=MGG_02370 PE=3 SV=1 - [G4MQZ2_MAGO7]	40.13	2	9	11	45	309	309	32.481	9.46631
G4MT46	Isopentenyl-diphosphate Delta-isomerase OS=Magnaporthe oryzae (strain 70-15 / ATCC MYA-4617 / FGSC 8958) GN=MGG_07125 PE=4 SV=1 - [G4MT46_MAGO7]	30.71	1	10	10	48	254	254	28.9014	5.50342
G4MXC0	Uncharacterized protein OS=Magnaporthe oryzae (strain 70-15 / ATCC MYA-4617 / FGSC 8958) GN=MGG_08260 PE=4 SV=1 - [G4MXC0_MAGO7]	44.48	1	12	12	46	308	308	34.2615	6.45557
G4NI28	Cation-transporting ATPase OS=Magnaporthe oryzae (strain 70-15 / ATCC MYA-4617 / FGSC 8958) GN=MGG_12005 PE=3 SV=1 - [G4NI28_MAGO7]	28.17	1	1	31	76	1331	1331	148.199	6.66846
G4MZ98	Uncharacterized protein OS=Magnaporthe oryzae (strain 70-15 / ATCC MYA-4617 / FGSC 8958) GN=MGG_08200 PE=3 SV=1 - [G4MZ98_MAGO7]	23.63	2	13	13	77	804	804	84.0604	4.90674
G4MNX1	Ribosomal protein L15 OS=Magnaporthe oryzae (strain 70-15 / ATCC MYA-4617 / FGSC 8958) GN=MGG_11785 PE=3 SV=1 - [G4MNX1_MAGO7]	39.9	3	8	8	68	203	203	24.1032	11.3267
G4MRM7	GTP-binding nuclear protein OS=Magnaporthe oryzae PE=2 SV=1 - [D4NXJ3_MAGOR]	66.67	2	11	11	75	216	216	24.2104	6.93213
G4N2G0	Endochitinase 1 OS=Magnaporthe oryzae (strain P131) GN=OOW_P131scaffold00279g9 PE=3 SV=1 - [L7JK14_MAGOP]	37.63	2	11	11	55	396	396	44.0182	5.021
G4NCW2	Uncharacterized protein OS=Magnaporthe oryzae (strain P131) GN=OOW_P131scaffold01132g12 PE=4 SV=1 - [L7J1F4_MAGOP]	84.31	1	8	8	49	153	153	16.4611	6.80029
G4MS63	Calcium-transporting ATPase OS=Magnaporthe oryzae (strain 70-15 / ATCC MYA-4617 / FGSC 8958) GN=MGG_04550 PE=3 SV=1 - [G4MS63_MAGO7]	18.88	1	15	15	42	996	996	108.131	5.41455
G4MXZ8	Beta 1,3 exoglucanase OS=Magnaporthe oryzae (strain 70-15 / ATCC MYA-4617 / FGSC 8958) GN=MGG_14087 PE=4 SV=1 - [G4MXZ8_MAGO7]	16.04	1	11	11	45	904	904	95.4922	8.25049
G4MYS3	Guanosine-diphosphatase OS=Magnaporthe oryzae (strain P131) GN=OOW_P131scaffold01076g31 PE=3 SV=1 - [L7J2H6_MAGOP]	33.15	7	15	15	50	552	552	60.1385	7.60596
G4NAS7	Uncharacterized protein OS=Magnaporthe oryzae (strain 70-15 / ATCC MYA-4617 / FGSC 8958) GN=MGG_03155 PE=3 SV=1 - [G4NAS7_MAGO7]	30.59	3	18	18	48	742	742	80.7978	6.84424
G4MTS3	Cystathionine gamma-synthase OS=Magnaporthe oryzae (strain 70-15 / ATCC MYA-4617 / FGSC 8958) GN=MGG_04764 PE=3 SV=1 - [G4MTS3_MAGO7]	45.5	1	1	15	69	433	433	47.459	6.44287
G4MNS0	Endo-1,6-beta-D-glucanase OS=Magnaporthe oryzae (strain 70-15 / ATCC MYA-4617 / FGSC 8958) GN=MGG_14602 PE=3 SV=1 - [G4MNS0_MAGO7]	39.96	1	1	14	54	488	488	53.6794	6.39209
G4NL95	Uncharacterized protein OS=Magnaporthe oryzae (strain 70-15 / ATCC MYA-4617 / FGSC 8958) GN=MGG_14055 PE=4 SV=1 - [G4NL95_MAGO7]	40.83	2	12	12	51	458	458	49.7908	5.2876
G4N7T4	Vesicular integral-membrane protein VIP36 OS=Magnaporthe oryzae (strain 70-15 / ATCC MYA-4617 / FGSC 8958) GN=MGG_06367 PE=4 SV=1 - [G4N7T4_MAGO7]	34.16	1	10	10	64	322	322	36.0509	8.32373
G4N4B9	Glutamyl-tRNA synthetase OS=Magnaporthe oryzae (strain 70-15 / ATCC MYA-4617 / FGSC 8958) GN=MGG_05956 PE=3 SV=1 - [G4N4B9_MAGO7]	44.25	2	25	25	74	635	635	72.2999	7.38623
G4N9H1	Nitrilase 2 OS=Magnaporthe oryzae (strain 70-15 / ATCC MYA-4617 / FGSC 8958) GN=MGG_03280 PE=4 SV=1 - [G4N9H1_MAGO7]	39.83	3	9	10	36	344	344	36.8844	5.49072
G4N784	Single-stranded DNA-binding protein OS=Magnaporthe oryzae (strain P131) GN=OOW_P131scaffold01381g51 PE=4 SV=1 - [L7IT79_MAGOP]	51.11	2	6	6	40	135	135	14.6946	9.979
G4NEA2	Hsp90-like protein OS=Magnaporthe oryzae (strain 70-15 / ATCC MYA-4617 / FGSC 8958) GN=MGG_00814 PE=4 SV=1 - [G4NEA2_MAGO7]	45.57	2	13	13	56	327	327	36.4115	5.73193
G4MKR2	40S ribosomal protein S25 OS=Magnaporthe oryzae (strain 70-15 / ATCC MYA-4617 / FGSC 8958) GN=MGG_06657 PE=4 SV=1 - [G4MKR2_MAGO7]	48.94	2	5	5	53	94	94	10.3177	9.94971
G4MQR2	ER-derived vesicles protein ERV29 OS=Magnaporthe oryzae (strain 70-15 / ATCC MYA-4617 / FGSC 8958) GN=MGG_09309 PE=4 SV=1 - [G4MQR2_MAGO7]	32.92	2	4	4	38	240	240	26.698	8.104
P0CT08	Eukaryotic translation initiation factor 3 subunit L OS=Magnaporthe oryzae (strain 70-15 / ATCC MYA-4617 / FGSC 8958) GN=MGG_05266 PE=3 SV=1 - [EIF3L_MAGO7]	23.99	1	11	11	55	471	471	54.3771	5.40186
G4N8Y8	Glycosyl hydrolase OS=Magnaporthe oryzae (strain 70-15 / ATCC MYA-4617 / FGSC 8958) GN=MGG_03351 PE=4 SV=1 - [G4N8Y8_MAGO7]	17.09	2	10	11	37	796	796	87.72	5.18604
G4NFB7	Thioredoxin OS=Magnaporthe oryzae (strain P131) GN=OOW_P131scaffold00562g12 PE=3 SV=1 - [L7J9K0_MAGOP]	70.09	2	6	6	45	107	107	11.92	5.74463
G4N275	Cell wall protein OS=Magnaporthe oryzae (strain P131) GN=OOW_P131scaffold00484g19 PE=4 SV=1 - [L7JBC2_MAGOP]	31.2	2	7	7	38	250	250	24.7966	5.13525
G4NFC3	L-asparaginase 1 OS=Magnaporthe oryzae (strain P131) GN=OOW_P131scaffold00562g5 PE=4 SV=1 - [L7J9A2_MAGOP]	34.68	1	12	12	44	447	447	47.8721	6.43018
G4N981	Serin endopeptidase, variant OS=Magnaporthe oryzae (strain 70-15 / ATCC MYA-4617 / FGSC 8958) GN=MGG_03316 PE=3 SV=1 - [G4N981_MAGO7]	17.47	2	12	12	39	807	807	85.5798	5.12256
A4RF05	Vacuolar protein sorting/targeting protein 10 OS=Magnaporthe oryzae (strain 70-15 / ATCC MYA-4617 / FGSC 8958) GN=VPS10 PE=3 SV=2 - [VPS10_MAGO7]	25.41	1	33	33	112	1515	1515	169.54	5.74463
G4N001	Inositol monophosphatase 2 OS=Magnaporthe oryzae (strain 70-15 / ATCC MYA-4617 / FGSC 8958) GN=MGG_06165 PE=4 SV=1 - [G4N001_MAGO7]	34.29	2	8	8	40	315	315	33.6988	5.2749
G4N7T0	Pyruvate dehydrogenase E1 component subunit alpha OS=Magnaporthe oryzae (strain 70-15 / ATCC MYA-4617 / FGSC 8958) GN=MGG_06371 PE=4 SV=1 - [G4N7T0_MAGO7]	28.37	2	12	12	38	416	416	46.1451	8.26514
G4MKE6	Uncharacterized protein OS=Magnaporthe oryzae (strain 70-15 / ATCC MYA-4617 / FGSC 8958) GN=MGG_10531 PE=4 SV=1 - [G4MKE6_MAGO7]	19.44	1	3	3	41	144	144	14.8859	4.80518
G4NDV6	Clock-controlled gene-9 protein OS=Magnaporthe oryzae (strain P131) GN=OOW_P131scaffold00214g14 PE=4 SV=1 - [L7JLB8_MAGOP]	35.06	2	18	18	67	696	696	77.8218	7.07861
G4NGE1	Uncharacterized protein OS=Magnaporthe oryzae (strain 70-15 / ATCC MYA-4617 / FGSC 8958) GN=MGG_04340 PE=4 SV=1 - [G4NGE1_MAGO7]	28.54	3	12	12	40	480	480	54.3455	6.0874
G4MNC1	Proteasome subunit beta type OS=Magnaporthe oryzae (strain P131) GN=OOW_P131scaffold00166g23 PE=3 SV=1 - [L7JM89_MAGOP]	46.92	2	9	9	66	211	211	22.6903	7.00537
G5EHR8	Uncharacterized protein OS=Magnaporthe oryzae (strain 70-15 / ATCC MYA-4617 / FGSC 8958) GN=MGCH7_ch7g691 PE=4 SV=1 - [G5EHR8_MAGO7]	15.29	1	14	14	45	1053	1053	120.037	4.90674
G4N2K3	Glycoside hydrolase OS=Magnaporthe oryzae (strain 70-15 / ATCC MYA-4617 / FGSC 8958) GN=MGG_13429 PE=4 SV=1 - [G4N2K3_MAGO7]	18.55	2	13	13	43	771	771	85.2823	5.47803
G4NAD7	Cytochrome c oxidase polypeptide 5 OS=Magnaporthe oryzae (strain 70-15 / ATCC MYA-4617 / FGSC 8958) GN=MGG_03188 PE=4 SV=1 - [G4NAD7_MAGO7]	53.29	1	7	7	32	167	167	18.6864	9.70068
G4NCX3	COP9 signalosome complex subunit 4 OS=Magnaporthe oryzae (strain 70-15 / ATCC MYA-4617 / FGSC 8958) GN=MGG_00336 PE=4 SV=1 - [G4NCX3_MAGO7]	17.62	1	5	5	21	420	420	46.2319	5.10986
G4MSJ2	Uncharacterized protein OS=Magnaporthe oryzae (strain 70-15 / ATCC MYA-4617 / FGSC 8958) GN=MGG_01461 PE=4 SV=1 - [G4MSJ2_MAGO7]	17.19	2	5	5	60	285	285	32.8371	8.63135
G4MSG8	Beta-glucosidase OS=Magnaporthe oryzae (strain P131) GN=OOW_P131scaffold00998g45 PE=3 SV=1 - [L7J528_MAGOP]	26.94	1	17	17	68	876	876	94.834	5.84619
G4NJJ2	Coatomer subunit gamma OS=Magnaporthe oryzae (strain P131) GN=OOW_P131scaffold01027g10 PE=3 SV=1 - [L7J429_MAGOP]	22.68	2	18	18	56	917	917	101.183	5.40186
G4MTJ8	Proteasome subunit alpha type OS=Magnaporthe oryzae (strain 70-15 / ATCC MYA-4617 / FGSC 8958) GN=MGG_07165 PE=3 SV=1 - [G4MTJ8_MAGO7]	44.52	1	10	10	50	283	283	30.4337	5.21143
G4NE97	Niemann-Pick C1 protein OS=Magnaporthe oryzae (strain P131) GN=OOW_P131scaffold00602g3 PE=4 SV=1 - [L7J8J1_MAGOP]	14.35	1	17	17	61	1275	1275	140.441	5.52881
G4MQ20	Uncharacterized protein OS=Magnaporthe oryzae (strain 70-15 / ATCC MYA-4617 / FGSC 8958) GN=MGG_02254 PE=4 SV=1 - [G4MQ20_MAGO7]	48.82	1	9	9	44	254	254	27.144	5.64307
Q2KGQ2	Putative uncharacterized protein OS=Magnaporthe oryzae (strain 70-15 / ATCC MYA-4617 / FGSC 8958) GN=MGCH7_ch7g283 PE=4 SV=1 - [Q2KGQ2_MAGO7]	54.65	2	12	12	60	258	258	28.509	5.94775
G4NJI5	Sulfate adenylyltransferase OS=Magnaporthe oryzae (strain P131) GN=MET3 PE=3 SV=1 - [L7J449_MAGOP]	41.54	2	17	17	62	573	573	64.1082	7.06396
G4N9J2	Histone chaperone OS=Magnaporthe oryzae (strain P131) GN=OOW_P131scaffold01311g45 PE=3 SV=1 - [L7IX17_MAGOP]	32.17	1	5	5	35	286	286	31.0615	3.95459
G4NB68	Phosphoribosylformylglycinamidine synthase OS=Magnaporthe oryzae (strain 70-15 / ATCC MYA-4617 / FGSC 8958) GN=MGG_11541 PE=3 SV=1 - [G4NB68_MAGO7]	21.34	2	21	21	50	1359	1359	147.473	5.47803
G4MTR3	ATP synthase OS=Magnaporthe oryzae PE=2 SV=1 - [D4NXH2_MAGOR]	45.53	2	10	10	44	246	246	26.7062	9.23193
G4NAV2	Ribosomal protein L30 OS=Magnaporthe oryzae PE=2 SV=1 - [D4NXC6_MAGOR]	58.88	1	7	7	44	107	107	11.5592	9.71533
G4N182	Uncharacterized protein OS=Magnaporthe oryzae (strain 70-15 / ATCC MYA-4617 / FGSC 8958) GN=MGG_07464 PE=4 SV=1 - [G4N182_MAGO7]	31.6	2	14	14	52	500	500	55.6987	7.35693
G4NA12	Uncharacterized protein OS=Magnaporthe oryzae (strain 70-15 / ATCC MYA-4617 / FGSC 8958) GN=MGG_14513 PE=4 SV=1 - [G4NA12_MAGO7]	25.97	1	9	9	26	462	462	50.6727	5.98584
G4N025	Uncharacterized protein OS=Magnaporthe oryzae (strain 70-15 / ATCC MYA-4617 / FGSC 8958) GN=MGG_06186 PE=4 SV=1 - [G4N025_MAGO7]	31.63	1	13	13	43	471	471	53.5747	5.26221
G5EGY2	Uncharacterized protein OS=Magnaporthe oryzae (strain 70-15 / ATCC MYA-4617 / FGSC 8958) GN=MGCH7_ch7g684 PE=4 SV=1 - [G5EGY2_MAGO7]	50.32	1	12	12	54	312	312	34.3468	6.45557
G4MKI5	Fimbrin OS=Magnaporthe oryzae (strain P131) GN=OOW_P131scaffold01147g2 PE=4 SV=1 - [L7J0Q9_MAGOP]	17.85	1	10	10	33	650	650	72.6454	6.1001
G4N2X9	Linoleate diol synthase OS=Magnaporthe oryzae (strain P131) GN=OOW_P131scaffold01380g5 PE=4 SV=1 - [L7ITC8_MAGOP]	33.81	2	31	31	73	1109	1109	124.607	8.23584
G4NB18	Salicylaldehyde dehydrogenase OS=Magnaporthe oryzae (strain 70-15 / ATCC MYA-4617 / FGSC 8958) GN=MGG_00652 PE=3 SV=1 - [G4NB18_MAGO7]	36.33	2	13	13	46	479	479	51.061	6.17627
G4MLS0	Probable ribosomal protein L13a OS=Magnaporthe oryzae PE=2 SV=1 - [D4NXD5_MAGOR]	48.51	1	12	12	76	202	202	23.0276	10.4331
G4NGH5	3'-phosphoadenosine 5'-phosphatase isoform A OS=Magnaporthe oryzae (strain P131) GN=OOW_P131scaffold01143g19 PE=4 SV=1 - [L7J0U5_MAGOP]	39.55	2	10	10	35	354	354	37.2794	5.5542
G4ML89	Cell division control protein 10 OS=Magnaporthe oryzae (strain P131) GN=OOW_P131scaffold00177g15 PE=3 SV=1 - [L7JNW0_MAGOP]	47.18	1	11	11	43	337	337	38.6409	7.6499
G4N4K1	Uncharacterized protein OS=Magnaporthe oryzae (strain 70-15 / ATCC MYA-4617 / FGSC 8958) GN=MGG_05978 PE=4 SV=1 - [G4N4K1_MAGO7]	31.02	1	5	5	41	187	187	19.8951	5.45264
G4NLF1	Oxalate decarboxylase oxdD OS=Magnaporthe oryzae (strain 70-15 / ATCC MYA-4617 / FGSC 8958) GN=MGG_14061 PE=4 SV=1 - [G4NLF1_MAGO7]	25	3	9	9	29	500	500	54.091	5.21143
G4MRQ5	Proteasome component C5 OS=Magnaporthe oryzae (strain 70-15 / ATCC MYA-4617 / FGSC 8958) GN=MGG_04622 PE=4 SV=1 - [G4MRQ5_MAGO7]	30.57	1	8	8	45	265	265	28.9893	6.55127
G4N769	Cysteine synthase OS=Magnaporthe oryzae (strain 70-15 / ATCC MYA-4617 / FGSC 8958) GN=MGG_06466 PE=4 SV=1 - [G4N769_MAGO7]	50.4	1	12	12	39	375	375	40.401	8.646
G4N0B5	Cystathionine beta-synthase OS=Magnaporthe oryzae (strain P131) GN=OOW_P131scaffold01585g15 PE=3 SV=1 - [L7IRI4_MAGOP]	26.7	2	9	9	33	528	528	56.7238	6.91748
G4MVN8	Threonine synthase OS=Magnaporthe oryzae (strain 70-15 / ATCC MYA-4617 / FGSC 8958) GN=MGG_08923 PE=4 SV=1 - [G4MVN8_MAGO7]	45.9	2	19	19	54	549	549	60.5588	5.96045
G4NHX7	Carboxylic ester hydrolase OS=Magnaporthe oryzae (strain 70-15 / ATCC MYA-4617 / FGSC 8958) GN=MGG_09404 PE=3 SV=1 - [G4NHX7_MAGO7]	37.41	2	14	14	46	540	540	58.7028	5.64307
G4MKH8	Ribonuclease Trv OS=Magnaporthe oryzae (strain P131) GN=OOW_P131scaffold00074g12 PE=3 SV=1 - [L7JPJ0_MAGOP]	27.36	1	8	8	47	318	318	34.7368	6.91748
G4MMQ3	Uncharacterized protein OS=Magnaporthe oryzae (strain 70-15 / ATCC MYA-4617 / FGSC 8958) GN=MGG_05565 PE=4 SV=1 - [G4MMQ3_MAGO7]	40.93	1	10	10	39	237	237	26.1444	6.15088
G4N8F6	60S ribosomal protein L2 OS=Magnaporthe oryzae (strain 70-15 / ATCC MYA-4617 / FGSC 8958) GN=MGG_06269 PE=4 SV=1 - [G4N8F6_MAGO7]	51.18	1	9	9	68	254	254	27.4068	10.8872
G4N0I3	Alpha-N-arabinofuranosidase A OS=Magnaporthe oryzae (strain 70-15 / ATCC MYA-4617 / FGSC 8958) GN=MGG_05809 PE=4 SV=1 - [G4N0I3_MAGO7]	27.24	1	13	13	50	646	646	71.6367	5.32568
G4NAI7	Uncharacterized protein OS=Magnaporthe oryzae (strain 70-15 / ATCC MYA-4617 / FGSC 8958) GN=MGG_13654 PE=4 SV=1 - [G4NAI7_MAGO7]	26.83	2	3	3	32	123	123	12.7342	5.94775
G4N4L4	26S proteasome regulatory subunit rpn2 OS=Magnaporthe oryzae (strain 70-15 / ATCC MYA-4617 / FGSC 8958) GN=MGG_05991 PE=4 SV=1 - [G4N4L4_MAGO7]	15.86	2	17	17	49	1192	1192	129.16	5.14795
G5EHD8	Glutamine synthetase OS=Magnaporthe oryzae (strain 70-15 / ATCC MYA-4617 / FGSC 8958) GN=MGCH7_ch7g251 PE=3 SV=1 - [G5EHD8_MAGO7]	30.98	1	10	10	31	481	481	53.1757	5.75732
G4N8K7	Acyl-CoA dehydrogenase OS=Magnaporthe oryzae (strain 70-15 / ATCC MYA-4617 / FGSC 8958) GN=MGG_03418 PE=4 SV=1 - [G4N8K7_MAGO7]	28.89	1	13	13	68	540	540	60.2964	8.14795
G4MZS0	Importin subunit alpha OS=Magnaporthe oryzae (strain 70-15 / ATCC MYA-4617 / FGSC 8958) GN=MGG_15072 PE=3 SV=1 - [G4MZS0_MAGO7]	23.59	3	11	11	36	551	551	60.0304	5.09717
Q9UVT8	6,7-dimethyl-8-ribityllumazine synthase OS=Magnaporthe oryzae (strain 70-15 / ATCC MYA-4617 / FGSC 8958) GN=MGG_04626 PE=1 SV=1 - [RIB4_MAGO7]	45.5	1	5	5	47	200	200	21.0589	6.18896
G4ML65	Allantoicase OS=Magnaporthe oryzae (strain 70-15 / ATCC MYA-4617 / FGSC 8958) GN=MGG_11871 PE=4 SV=1 - [G4ML65_MAGO7]	41.18	2	13	13	54	357	357	39.1895	6.06201
G4MSF4	Uncharacterized protein OS=Magnaporthe oryzae (strain 70-15 / ATCC MYA-4617 / FGSC 8958) GN=MGG_04522 PE=4 SV=1 - [G4MSF4_MAGO7]	70.21	1	8	8	26	188	188	19.6254	5.2749
G4MUK8	Cytochrome c oxidase polypeptide VI,variant2 OS=Magnaporthe oryzae (strain Y34) GN=OOU_Y34scaffold00597g10 PE=4 SV=1 - [L7I2E6_MAGOY]	62.28	1	9	9	36	167	167	18.4235	5.63037
G4MUX0	Isocitrate dehydrogenase [NAD] subunit, mitochondrial OS=Magnaporthe oryzae (strain P131) GN=OOW_P131scaffold00570g10 PE=3 SV=1 - [L7JA55_MAGOP]	40.26	1	12	12	48	385	385	41.3476	7.82568
G4N3A3	Peptidase OS=Magnaporthe oryzae (strain 70-15 / ATCC MYA-4617 / FGSC 8958) GN=MGG_10942 PE=3 SV=1 - [G4N3A3_MAGO7]	31.73	1	8	19	64	769	769	85.3617	5.65576
G4MTQ9	Cysteine desulfurase OS=Magnaporthe oryzae (strain 70-15 / ATCC MYA-4617 / FGSC 8958) GN=MGG_04744 PE=4 SV=1 - [G4MTQ9_MAGO7]	48.39	1	14	14	54	403	403	44.5647	5.33838
G4MPA9	Uncharacterized protein OS=Magnaporthe oryzae (strain 70-15 / ATCC MYA-4617 / FGSC 8958) GN=MGG_07016 PE=4 SV=1 - [G4MPA9_MAGO7]	26.72	1	7	7	40	348	348	37.7337	5.66846
G4MP91	Uncharacterized protein OS=Magnaporthe oryzae (strain 70-15 / ATCC MYA-4617 / FGSC 8958) GN=MGG_02199 PE=4 SV=1 - [G4MP91_MAGO7]	64.41	1	5	5	28	118	118	13.2093	4.97021
G4NHC0	Gamma-glutamyltranspeptidase 1 OS=Magnaporthe oryzae (strain P131) GN=OOW_P131scaffold01181g14 PE=4 SV=1 - [L7J1T1_MAGOP]	24.66	2	11	11	59	519	519	56.0121	5.50342
G4MTA9	Uncharacterized protein OS=Magnaporthe oryzae (strain P131) GN=OOW_P131scaffold00467g3 PE=4 SV=1 - [L7JC10_MAGOP]	19.66	1	7	7	23	529	529	54.8424	5.32568
G4MST1	Inosine-uridine preferring nucleoside hydrolase OS=Magnaporthe oryzae (strain 70-15 / ATCC MYA-4617 / FGSC 8958) GN=MGG_04540 PE=4 SV=1 - [G4MST1_MAGO7]	38.57	1	10	10	49	433	433	47.2603	5.69385
G4NAI2	Argininosuccinate lyase OS=Magnaporthe oryzae (strain P131) GN=OOW_P131scaffold01291g26 PE=3 SV=1 - [L7IWW0_MAGOP]	39.74	1	15	15	58	468	468	52.6745	5.79541
G4N8M5	Sphingolipid C9-methyltransferase OS=Magnaporthe oryzae (strain 70-15 / ATCC MYA-4617 / FGSC 8958) GN=MGG_14886 PE=4 SV=1 - [G4N8M5_MAGO7]	22.66	2	12	12	49	512	512	57.6742	6.0874
G4NE27	Flotillin domain-containing protein OS=Magnaporthe oryzae (strain Y34) GN=OOU_Y34scaffold00126g6 PE=4 SV=1 - [L7IKN0_MAGOY]	36.95	3	15	15	36	498	498	55.309	6.16357
G4NBI8	Uncharacterized protein OS=Magnaporthe oryzae (strain 70-15 / ATCC MYA-4617 / FGSC 8958) GN=MGG_00527 PE=4 SV=1 - [G4NBI8_MAGO7]	19.81	1	4	4	28	207	207	20.5342	8.1333
G4MZF7	Uncharacterized protein OS=Magnaporthe oryzae (strain P131) GN=OOW_P131scaffold01166g24 PE=4 SV=1 - [L7J0G3_MAGOP]	50.79	2	4	4	27	126	126	13.5007	6.75635
G5EH27	3-oxoacyl-[acyl-carrier-protein] reductase OS=Magnaporthe oryzae (strain 70-15 / ATCC MYA-4617 / FGSC 8958) GN=MGCH7_ch7g333 PE=4 SV=1 - [G5EH27_MAGO7]	36.43	1	8	8	72	280	280	29.6432	6.62451
G4MKD3	Exportin-1 OS=Magnaporthe oryzae (strain 70-15 / ATCC MYA-4617 / FGSC 8958) GN=MGG_02526 PE=3 SV=1 - [G4MKD3_MAGO7]	25.81	2	25	25	68	1081	1081	124.24	5.35107
G4N3U3	Uncharacterized protein OS=Magnaporthe oryzae (strain 70-15 / ATCC MYA-4617 / FGSC 8958) GN=MGG_05017 PE=4 SV=1 - [G4N3U3_MAGO7]	29.95	2	16	16	42	631	631	69.2767	5.37646
A4RC23	Nascent polypeptide-associated complex subunit beta OS=Magnaporthe oryzae (strain P131) GN=OOW_P131scaffold00596g9 PE=3 SV=1 - [L7J8T4_MAGOP]	30.72	2	3	3	35	153	153	16.6446	6.06201
G4NDS1	Phenylalanyl-tRNA synthetase OS=Magnaporthe oryzae (strain 70-15 / ATCC MYA-4617 / FGSC 8958) GN=MGG_00876 PE=4 SV=1 - [G4NDS1_MAGO7]	25.9	2	13	13	52	583	583	65.0272	5.51611
G4NHE3	Minor extracellular protease vpr OS=Magnaporthe oryzae (strain P131) GN=OOW_P131scaffold01331g13 PE=3 SV=1 - [L7IV10_MAGOP]	16.36	1	14	14	54	917	917	97.7348	6.17627
G4N6K9	Uncharacterized protein OS=Magnaporthe oryzae (strain P131) GN=OOW_P131scaffold00265g10 PE=4 SV=1 - [L7JK08_MAGOP]	23.83	1	15	15	67	814	814	91.5523	6.12549
G4MKY3	Beta-1,6-galactanase OS=Magnaporthe oryzae (strain 70-15 / ATCC MYA-4617 / FGSC 8958) GN=MGG_05381 PE=3 SV=1 - [G4MKY3_MAGO7]	23.54	1	10	10	49	480	480	53.9494	5.66846
G4N1F2	3-ketoacyl-CoA thiolase OS=Magnaporthe oryzae (strain 70-15 / ATCC MYA-4617 / FGSC 8958) GN=MGG_09512 PE=3 SV=1 - [G4N1F2_MAGO7]	29.59	1	10	10	55	419	419	43.6914	6.69775
G4NKY6	Carboxylic ester hydrolase OS=Magnaporthe oryzae (strain Y34) GN=OOU_Y34scaffold00483g2 PE=3 SV=1 - [L7I9G7_MAGOY]	25.24	3	9	9	40	511	511	54.1331	6.63916
G4N8F1	Enoyl-CoA hydratase OS=Magnaporthe oryzae (strain 70-15 / ATCC MYA-4617 / FGSC 8958) GN=MGG_12868 PE=3 SV=1 - [G4N8F1_MAGO7]	46.39	2	14	14	56	291	291	31.3572	9.0708
G4N4C7	Uncharacterized protein OS=Magnaporthe oryzae (strain 70-15 / ATCC MYA-4617 / FGSC 8958) GN=MGG_05962 PE=4 SV=1 - [G4N4C7_MAGO7]	65.6	1	7	7	33	125	125	13.7962	5.31299
G4NKC0	Cell division control protein 11 OS=Magnaporthe oryzae (strain 70-15 / ATCC MYA-4617 / FGSC 8958) GN=MGG_03087 PE=3 SV=1 - [G4NKC0_MAGO7]	35.51	3	11	11	34	383	383	43.4169	5.10986
G4NC58	Cytochrome c oxidase polypeptide IV OS=Magnaporthe oryzae (strain 70-15 / ATCC MYA-4617 / FGSC 8958) GN=MGG_01135 PE=4 SV=1 - [G4NC58_MAGO7]	69.89	2	11	11	72	186	186	20.6293	6.94678
G4NC37	Uncharacterized protein OS=Magnaporthe oryzae (strain 70-15 / ATCC MYA-4617 / FGSC 8958) GN=MGG_00444 PE=4 SV=1 - [G4NC37_MAGO7]	43.77	1	8	8	35	281	281	29.7381	6.25244
G4N6W6	Cytochrome b5 OS=Magnaporthe oryzae (strain P131) GN=OOW_P131scaffold00415g16 PE=3 SV=1 - [L7JDD4_MAGOP]	47.48	1	4	4	53	139	139	14.9233	4.79248
G4MP67	Uncharacterized protein OS=Magnaporthe oryzae (strain 70-15 / ATCC MYA-4617 / FGSC 8958) GN=MGG_02169 PE=4 SV=1 - [G4MP67_MAGO7]	38.08	1	13	13	51	428	428	48.4574	6.15088
G4MTL4	GTP-binding protein rhoA OS=Magnaporthe oryzae (strain 70-15 / ATCC MYA-4617 / FGSC 8958) GN=MGG_07176 PE=4 SV=1 - [G4MTL4_MAGO7]	24.87	4	6	6	31	193	193	21.8164	6.97607
G4MTR0	ARP2/3 complex 34 kDa subunit OS=Magnaporthe oryzae (strain 70-15 / ATCC MYA-4617 / FGSC 8958) GN=MGG_04745 PE=4 SV=1 - [G4MTR0_MAGO7]	43.89	2	11	11	46	319	319	36.7489	7.03467
G4MP23	Uncharacterized protein OS=Magnaporthe oryzae (strain 70-15 / ATCC MYA-4617 / FGSC 8958) GN=MGG_05685 PE=4 SV=1 - [G4MP23_MAGO7]	49.11	1	16	16	53	450	450	49.8294	6.771
G4MYW4	Uncharacterized protein OS=Magnaporthe oryzae (strain P131) GN=OOW_P131scaffold00888g24 PE=4 SV=1 - [L7J935_MAGOP]	36.21	2	8	8	36	232	232	24.7567	8.95361
G4NAT1	ATP synthase subunit 5 OS=Magnaporthe oryzae (strain P131) GN=OOW_P131scaffold01199g2 PE=3 SV=1 - [L7IYS7_MAGOP]	50.88	1	10	10	35	228	228	23.8769	9.40771
G4MN57	Glucosidase 2 subunit beta OS=Magnaporthe oryzae (strain P131) GN=OOW_P131scaffold00440g10 PE=4 SV=1 - [L7JCL9_MAGOP]	24.91	1	12	12	38	562	562	62.6588	4.98291
G4N625	Acetyl-CoA hydrolase OS=Magnaporthe oryzae (strain P131) GN=OOW_P131scaffold01296g37 PE=4 SV=1 - [L7IWN6_MAGOP]	29.09	1	15	15	60	526	526	58.3565	6.85889
G4MN18	GTP cyclohydrolase II OS=Magnaporthe oryzae (strain 70-15 / ATCC MYA-4617 / FGSC 8958) GN=MGG_06917 PE=4 SV=1 - [G4MN18_MAGO7]	30.6	2	13	13	61	513	513	55.8912	6.23975
G4N2Q4	Uncharacterized protein OS=Magnaporthe oryzae (strain 70-15 / ATCC MYA-4617 / FGSC 8958) GN=MGG_12973 PE=4 SV=1 - [G4N2Q4_MAGO7]	30	2	10	10	41	510	510	55.6542	6.41748
G4NFU2	Carboxypeptidase A2 OS=Magnaporthe oryzae (strain 70-15 / ATCC MYA-4617 / FGSC 8958) GN=MGG_08711 PE=4 SV=1 - [G4NFU2_MAGO7]	19.32	1	6	6	29	440	440	47.9715	5.04639
G4NIB7	3-ketoacyl-CoA thiolase OS=Magnaporthe oryzae (strain 70-15 / ATCC MYA-4617 / FGSC 8958) GN=MGG_10700 PE=3 SV=1 - [G4NIB7_MAGO7]	37.74	1	12	12	43	416	416	43.7721	6.69775
G4MQW1	Uncharacterized protein OS=Magnaporthe oryzae (strain 70-15 / ATCC MYA-4617 / FGSC 8958) GN=MGG_04736 PE=4 SV=1 - [G4MQW1_MAGO7]	42.9	1	10	10	42	303	303	33.9175	6.69775
G4N5B0	3-isopropylmalate dehydrogenase OS=Magnaporthe oryzae (strain P131) GN=OOW_P131scaffold01012g2 PE=3 SV=1 - [L7J5G7_MAGOP]	29.51	1	9	9	24	366	366	38.5751	5.57959
G4N943	Aspartylglucosaminidase OS=Magnaporthe oryzae (strain 70-15 / ATCC MYA-4617 / FGSC 8958) GN=MGG_03346 PE=4 SV=1 - [G4N943_MAGO7]	20.85	1	7	7	26	355	355	37.0149	5.96045
G4MNV7	Succinate--CoA ligase [ADP-forming] subunit beta, mitochondrial OS=Magnaporthe oryzae (strain P131) GN=OOW_P131scaffold00448g6 PE=3 SV=1 - [L7JCQ7_MAGOP]	32.74	1	11	11	32	446	446	48.3799	5.96045
G4MZT0	Uncharacterized protein OS=Magnaporthe oryzae (strain 70-15 / ATCC MYA-4617 / FGSC 8958) GN=MGG_09079 PE=4 SV=1 - [G4MZT0_MAGO7]	22.22	1	4	4	39	234	234	23.4235	5.75732
G4MU46	Peptidylprolyl isomerase OS=Magnaporthe oryzae (strain 70-15 / ATCC MYA-4617 / FGSC 8958) GN=MGG_07234 PE=4 SV=1 - [G4MU46_MAGO7]	31.35	2	6	6	37	185	185	19.55	4.84326
G4NAB9	Acetyl-coenzyme A synthetase OS=Magnaporthe oryzae (strain 70-15 / ATCC MYA-4617 / FGSC 8958) GN=MGG_03201 PE=3 SV=1 - [G4NAB9_MAGO7]	27.06	2	16	17	83	669	669	74.6259	6.40479
G4MVC4	Acetyl-CoA acetyltransferase OS=Magnaporthe oryzae (strain 70-15 / ATCC MYA-4617 / FGSC 8958) GN=MGG_01755 PE=3 SV=1 - [G4MVC4_MAGO7]	31.87	1	9	9	33	433	433	45.4426	8.89502
G4MNP7	Uncharacterized protein OS=Magnaporthe oryzae (strain 70-15 / ATCC MYA-4617 / FGSC 8958) GN=MGG_02105 PE=4 SV=1 - [G4MNP7_MAGO7]	42.76	1	10	10	43	304	304	34.2621	5.61768
G4N0M8	Rpl11ap OS=Magnaporthe oryzae PE=2 SV=1 - [D4NXH9_MAGOR]	26.59	1	5	5	37	173	173	19.9625	10.1841
G4MP88	Alpha-L-rhamnosidase A OS=Magnaporthe oryzae (strain 70-15 / ATCC MYA-4617 / FGSC 8958) GN=MGG_02192 PE=4 SV=1 - [G4MP88_MAGO7]	27.76	2	17	17	42	879	879	96.6307	5.49072
G4N7Y8	UDP-glucose:glycoprotein glucosyltransferase OS=Magnaporthe oryzae (strain 70-15 / ATCC MYA-4617 / FGSC 8958) GN=MGG_03510 PE=4 SV=1 - [G4N7Y8_MAGO7]	18.24	1	21	21	47	1508	1508	167.922	5.40186
G4MTG7	Long-chain-fatty-acid-CoA ligase 1 OS=Magnaporthe oryzae (strain 70-15 / ATCC MYA-4617 / FGSC 8958) GN=MGG_01551 PE=4 SV=1 - [G4MTG7_MAGO7]	32.95	2	18	18	57	695	695	75.6068	7.50342
G4NEJ1	Endochitinase OS=Magnaporthe oryzae (strain 70-15 / ATCC MYA-4617 / FGSC 8958) GN=MGG_00086 PE=3 SV=1 - [G4NEJ1_MAGO7]	49.53	1	11	11	42	424	424	45.6504	6.18896
G4MRR1	Uncharacterized protein OS=Magnaporthe oryzae (strain 70-15 / ATCC MYA-4617 / FGSC 8958) GN=MGG_04599 PE=4 SV=1 - [G4MRR1_MAGO7]	6.55	2	1	1	24	229	229	23.0679	8.36768
G4NBZ7	Alpha-1,2 mannosyltransferase KTR1 OS=Magnaporthe oryzae (strain 70-15 / ATCC MYA-4617 / FGSC 8958) GN=MGG_01140 PE=4 SV=1 - [G4NBZ7_MAGO7]	34.11	1	15	16	39	516	516	59.7558	6.84424
G4NG28	Uncharacterized protein OS=Magnaporthe oryzae (strain P131) GN=OOW_P131scaffold00145g2 PE=4 SV=1 - [L7JPS7_MAGOP]	35.4	1	9	9	33	404	404	42.8485	8.06006
G4NAD2	Uncharacterized protein OS=Magnaporthe oryzae (strain P131) GN=OOW_P131scaffold01199g46 PE=4 SV=1 - [L7J0V8_MAGOP]	50.94	2	6	6	23	159	159	17.5115	4.66553
G4MPV8	Heavy metal tolerance protein OS=Magnaporthe oryzae (strain P131) GN=OOW_P131scaffold00417g15 PE=4 SV=1 - [L7JDD2_MAGOP]	19.44	1	12	12	47	720	720	79.5404	8.1626
A4R188	40S ribosomal protein S0 OS=Magnaporthe oryzae (strain 70-15 / ATCC MYA-4617 / FGSC 8958) GN=RPS0 PE=3 SV=1 - [RSSA_MAGO7]	45.99	2	8	8	35	287	287	31.2106	4.95752
G4NL54	Uncharacterized protein OS=Magnaporthe oryzae (strain 70-15 / ATCC MYA-4617 / FGSC 8958) GN=MGG_09641 PE=4 SV=1 - [G4NL54_MAGO7]	11.67	2	2	2	19	257	257	26.2529	4.7417
G4MU29	Iron transport multicopper oxidase FET3 OS=Magnaporthe oryzae (strain 70-15 / ATCC MYA-4617 / FGSC 8958) GN=MGG_07220 PE=3 SV=1 - [G4MU29_MAGO7]	21.03	2	10	10	41	542	542	60.1137	6.20166
G4MZP2	Proteasome subunit beta type OS=Magnaporthe oryzae (strain 70-15 / ATCC MYA-4617 / FGSC 8958) GN=MGG_07031 PE=3 SV=1 - [G4MZP2_MAGO7]	32.02	2	8	8	40	203	203	22.5077	8.35303
G4N414	Fumarylacetoacetate hydrolase domain-containing protein 2A OS=Magnaporthe oryzae (strain 70-15 / ATCC MYA-4617 / FGSC 8958) GN=MGG_05915 PE=4 SV=1 - [G4N414_MAGO7]	55.79	2	13	13	48	285	285	31.02	6.12549
G4N340	Uncharacterized protein OS=Magnaporthe oryzae (strain 70-15 / ATCC MYA-4617 / FGSC 8958) GN=MGG_04913 PE=4 SV=1 - [G4N340_MAGO7]	46.15	2	4	4	25	104	104	11.5061	4.32275
G4MWG9	Beta-xylosidase OS=Magnaporthe oryzae (strain 70-15 / ATCC MYA-4617 / FGSC 8958) GN=MGG_08985 PE=4 SV=1 - [G4MWG9_MAGO7]	25.74	2	20	20	54	847	847	92.1001	6.43018
G4N1S7	Actin-related protein 2/3 complex subunit 5 OS=Magnaporthe oryzae (strain P131) GN=OOW_P131scaffold01234g18 PE=3 SV=1 - [L7IXZ4_MAGOP]	65.84	1	9	9	26	202	202	21.7359	5.57959
G4N712	Adenylosuccinate lyase OS=Magnaporthe oryzae (strain 70-15 / ATCC MYA-4617 / FGSC 8958) GN=MGG_03645 PE=3 SV=1 - [G4N712_MAGO7]	35.05	2	15	15	43	485	485	54.374	6.59521
G4MSC5	Dihydrolipoamide acetyltransferase component of pyruvate dehydrogenase complex OS=Magnaporthe oryzae (strain P131) GN=OOW_P131scaffold01358g19 PE=3 SV=1 - [L7IVQ5_MAGOP]	28.49	1	11	11	38	523	523	56.4156	8.79248
G4MYM7	Uncharacterized protein OS=Magnaporthe oryzae (strain 70-15 / ATCC MYA-4617 / FGSC 8958) GN=MGG_01333 PE=3 SV=1 - [G4MYM7_MAGO7]	33.68	1	7	7	24	291	291	33.1199	8.36768
G4NDY1	PX domain-containing protein OS=Magnaporthe oryzae (strain P131) GN=OOW_P131scaffold01123g8 PE=4 SV=1 - [L7J3F4_MAGOP]	23.11	1	20	20	39	939	939	107.048	6.27783
G4ND99	FAD binding domain-containing protein OS=Magnaporthe oryzae (strain 70-15 / ATCC MYA-4617 / FGSC 8958) GN=MGG_00276 PE=4 SV=1 - [G4ND99_MAGO7]	22.76	1	9	9	37	514	514	55.3195	6.78564
G4N3I0	Lysine--tRNA ligase OS=Magnaporthe oryzae (strain P131) GN=OOW_P131scaffold00314g113 PE=3 SV=1 - [L7JJ21_MAGOP]	37.24	1	17	17	47	615	615	70.1722	6.26514
G4N121	Uncharacterized protein OS=Magnaporthe oryzae (strain 70-15 / ATCC MYA-4617 / FGSC 8958) GN=MGG_07787 PE=4 SV=1 - [G4N121_MAGO7]	21.11	1	8	9	25	559	559	62.2048	4.94482
G4MVB4	Uncharacterized protein OS=Magnaporthe oryzae (strain 70-15 / ATCC MYA-4617 / FGSC 8958) GN=MGG_01746 PE=4 SV=1 - [G4MVB4_MAGO7]	31.93	2	9	9	21	379	379	40.1274	5.8208
G4MWK7	Beta-mannosidase OS=Magnaporthe oryzae (strain 70-15 / ATCC MYA-4617 / FGSC 8958) GN=MGG_01178 PE=4 SV=1 - [G4MWK7_MAGO7]	34.62	3	24	24	69	858	858	97.8139	5.26221
G4NG45	Galactose oxidase OS=Magnaporthe oryzae (strain 70-15 / ATCC MYA-4617 / FGSC 8958) GN=MGG_10878 PE=4 SV=1 - [G4NG45_MAGO7]	28.64	2	13	13	33	611	611	64.124	7.15186
G4MY25	Uncharacterized protein OS=Magnaporthe oryzae (strain 70-15 / ATCC MYA-4617 / FGSC 8958) GN=MGG_10456 PE=4 SV=1 - [G4MY25_MAGO7]	36.91	1	3	3	18	149	149	16.2409	6.27783
G4MZT1	Arginyl-tRNA synthetase OS=Magnaporthe oryzae (strain P131) GN=OOW_P131scaffold00449g11 PE=3 SV=1 - [L7JDG4_MAGOP]	35.52	2	21	21	62	639	639	72.7123	6.82959
G4N4M8	Prohibitin-1 OS=Magnaporthe oryzae (strain P131) GN=OOW_P131scaffold00463g10 PE=4 SV=1 - [L7JCT8_MAGOP]	44.73	1	11	11	31	275	275	30.199	9.27588
A4QTE3	Very-long-chain 3-oxoacyl-CoA reductase OS=Magnaporthe oryzae (strain 70-15 / ATCC MYA-4617 / FGSC 8958) GN=MGG_05096 PE=3 SV=1 - [MKAR_MAGO7]	25.98	1	7	7	27	331	331	36.1112	9.68604
G4N419	FAD binding domain-containing protein OS=Magnaporthe oryzae (strain 70-15 / ATCC MYA-4617 / FGSC 8958) GN=MGG_13262 PE=4 SV=1 - [G4N419_MAGO7]	29.42	2	11	11	50	520	520	54.7435	4.83057
G4NEQ0	Uncharacterized protein OS=Magnaporthe oryzae (strain 70-15 / ATCC MYA-4617 / FGSC 8958) GN=MGG_00081 PE=4 SV=1 - [G4NEQ0_MAGO7]	33.86	1	5	5	18	189	189	19.6416	5.19873
G4NKB0	Oxidoreductase OS=Magnaporthe oryzae (strain 70-15 / ATCC MYA-4617 / FGSC 8958) GN=MGG_03097 PE=4 SV=1 - [G4NKB0_MAGO7]	24.55	2	9	9	27	444	444	46.1195	5.74463
G4MTN1	Dolichyl-phosphate-mannose-protein mannosyltransferase 2 OS=Magnaporthe oryzae (strain P131) GN=OOW_P131scaffold00461g8 PE=4 SV=1 - [L7JC60_MAGOP]	24.05	2	16	16	74	736	736	84.4516	7.63525
G4NC88	40S ribosomal protein S10-A OS=Magnaporthe oryzae (strain 70-15 / ATCC MYA-4617 / FGSC 8958) GN=MGG_01113 PE=4 SV=1 - [G4NC88_MAGO7]	50.59	1	7	7	70	170	170	19.1287	9.77393
G4MYS1	Ras-like protein Rab7 OS=Magnaporthe oryzae (strain 70-15 / ATCC MYA-4617 / FGSC 8958) GN=MGG_08144 PE=4 SV=1 - [G4MYS1_MAGO7]	59.51	2	10	10	48	205	205	22.9344	5.021
G4MX52	Uncharacterized protein OS=Magnaporthe oryzae (strain P131) GN=OOW_P131scaffold00062g2 PE=4 SV=1 - [L7JQ98_MAGOP]	27.86	1	7	7	38	280	280	31.0657	10.0815
G4NF67	Uncharacterized protein OS=Magnaporthe oryzae (strain 70-15 / ATCC MYA-4617 / FGSC 8958) GN=MGG_04184 PE=4 SV=1 - [G4NF67_MAGO7]	30.35	1	8	8	47	313	313	34.6731	5.5415
G4MV91	Cytochrome b2 OS=Magnaporthe oryzae (strain P131) GN=OOW_P131scaffold00570g22 PE=3 SV=1 - [L7J949_MAGOP]	29.55	1	12	12	25	494	494	54.4258	6.66846
G4N6Z0	Thymine dioxygenase OS=Magnaporthe oryzae (strain P131) GN=OOW_P131scaffold01381g10 PE=3 SV=1 - [L7IV07_MAGOP]	56.55	1	15	15	45	336	336	37.1616	5.13525
G4NBV4	Nitrate reductase 1 OS=Magnaporthe oryzae (strain 70-15 / ATCC MYA-4617 / FGSC 8958) GN=MGG_14232 PE=4 SV=1 - [G4NBV4_MAGO7]	24.53	2	11	11	36	591	591	67.1959	7.60596
G4N849	Curved DNA-binding protein OS=Magnaporthe oryzae (strain 70-15 / ATCC MYA-4617 / FGSC 8958) GN=MGG_06316 PE=4 SV=1 - [G4N849_MAGO7]	34.87	2	15	15	36	413	413	44.9717	7.7085
A4UBV5	Kynureninase OS=Magnaporthe oryzae (strain 70-15 / ATCC MYA-4617 / FGSC 8958) GN=BNA5 PE=3 SV=2 - [KYNU_MAGO7]	24.55	4	11	11	59	497	497	54.4442	6.66846
Q2KGY9	Putative uncharacterized protein OS=Magnaporthe oryzae (strain 70-15 / ATCC MYA-4617 / FGSC 8958) GN=MGCH7_ch7g196 PE=4 SV=1 - [Q2KGY9_MAGO7]	22.75	2	12	12	44	633	633	69.2391	6.16357
G4MZE5	Uncharacterized protein OS=Magnaporthe oryzae (strain 70-15 / ATCC MYA-4617 / FGSC 8958) GN=MGG_15537 PE=4 SV=1 - [G4MZE5_MAGO7]	22.15	2	12	12	26	650	650	69.3371	5.64307
G4N6R7	Rps11bp OS=Magnaporthe oryzae PE=2 SV=1 - [D4NXC0_MAGOR]	47.2	1	9	9	57	161	161	18.433	10.6235
G4MZV3	Endo-1,4-beta-xylanase OS=Magnaporthe oryzae (strain P131) GN=OOW_P131scaffold00959g2 PE=4 SV=1 - [L7J5X0_MAGOP]	15.14	1	12	12	30	1050	1050	113.395	5.52881
G5EHT3	Cysteine proteinase 1 OS=Magnaporthe oryzae (strain 70-15 / ATCC MYA-4617 / FGSC 8958) GN=MGCH7_ch7g434 PE=4 SV=1 - [G5EHT3_MAGO7]	30.37	1	14	14	48	507	507	57.0281	6.56592
Q51VY4	Protein YOP1 OS=Magnaporthe oryzae (strain 70-15 / ATCC MYA-4617 / FGSC 8958) GN=YOP1 PE=3 SV=2 - [YOP1_MAGO7]	20.59	3	4	4	52	170	170	19.315	8.80713
G4MVI1	Sarcosine oxidase OS=Magnaporthe oryzae (strain Y34) GN=OOU_Y34scaffold00034g8 PE=4 SV=1 - [L7INV6_MAGOY]	35.25	3	14	14	60	451	451	50.1641	7.26904
G4MY05	Endoribonuclease L-PSP OS=Magnaporthe oryzae (strain 70-15 / ATCC MYA-4617 / FGSC 8958) GN=MGG_10440 PE=4 SV=1 - [G4MY05_MAGO7]	17.19	1	2	2	13	128	128	13.927	4.99561
G4N471	Potassium/sodium efflux P-type ATPase OS=Magnaporthe oryzae (strain 70-15 / ATCC MYA-4617 / FGSC 8958) GN=MGG_05078 PE=3 SV=1 - [G4N471_MAGO7]	16.49	2	16	16	41	1110	1110	122.362	7.60596
G4ND83	Uncharacterized protein OS=Magnaporthe oryzae (strain 70-15 / ATCC MYA-4617 / FGSC 8958) GN=MGG_00290 PE=4 SV=1 - [G4ND83_MAGO7]	31.31	2	5	5	17	214	214	23.1347	4.80518
G4MZ06	Protein phosphatase 2C Ptc2 OS=Magnaporthe oryzae (strain 70-15 / ATCC MYA-4617 / FGSC 8958) GN=MGG_01351 PE=3 SV=1 - [G4MZ06_MAGO7]	20.84	1	8	8	16	451	451	48.7434	4.729
G4N7K8	Coronin OS=Magnaporthe oryzae (strain 70-15 / ATCC MYA-4617 / FGSC 8958) GN=MGG_06389 PE=3 SV=1 - [G4N7K8_MAGO7]	6.85	2	4	4	23	613	613	66.7454	6.04932
A4RD93	Adenylate kinase OS=Magnaporthe oryzae (strain 70-15 / ATCC MYA-4617 / FGSC 8958) GN=ADK1 PE=3 SV=1 - [KAD2_MAGO7]	61.23	1	13	13	55	276	276	29.7494	8.71924
G4NI95	Guanyl-specific ribonuclease F1 OS=Magnaporthe oryzae (strain 70-15 / ATCC MYA-4617 / FGSC 8958) GN=MGG_10720 PE=4 SV=1 - [G4NI95_MAGO7]	25.56	2	3	3	31	180	180	18.505	8.17725
G4NHF4	Alpha,alpha-trehalose-phosphate synthase (UDP-forming) OS=Magnaporthe oryzae (strain P131) GN=OOW_P131scaffold01331g25 PE=3 SV=1 - [L7IW45_MAGOP]	28.92	1	11	11	31	529	529	58.3978	5.87158
G4N6C5	60S ribosomal protein L43 OS=Magnaporthe oryzae (strain 70-15 / ATCC MYA-4617 / FGSC 8958) GN=MGG_06571 PE=3 SV=1 - [G4N6C5_MAGO7]	42.39	1	4	4	29	92	92	10.0453	10.6528
G4MWD9	Uncharacterized protein OS=Magnaporthe oryzae (strain P131) GN=OOW_P131scaffold00437g1 PE=4 SV=1 - [L7JDU3_MAGOP]	37.21	1	7	7	22	258	258	26.5317	6.34131
G4N6D6	Uncharacterized protein OS=Magnaporthe oryzae (strain P131) GN=OOW_P131scaffold00753g6 PE=3 SV=1 - [L7J7Q3_MAGOP]	20.27	1	5	5	24	222	222	23.241	10.2134
G4N1C2	Gamma-glutamyltranspeptidase OS=Magnaporthe oryzae (strain 70-15 / ATCC MYA-4617 / FGSC 8958) GN=MGG_09541 PE=4 SV=1 - [G4N1C2_MAGO7]	29.62	3	14	14	34	611	611	64.5584	6.39209
G4NHY5	Peroxidase OS=Magnaporthe oryzae (strain 70-15 / ATCC MYA-4617 / FGSC 8958) GN=MGG_09398 PE=3 SV=1 - [G4NHY5_MAGO7]	24.82	3	11	11	38	548	548	57.9427	5.08447
G4NB45	Alpha-xylosidase OS=Magnaporthe oryzae (strain 70-15 / ATCC MYA-4617 / FGSC 8958) GN=MGG_11536 PE=3 SV=1 - [G4NB45_MAGO7]	27.38	4	17	17	49	789	789	88.6647	5.61768
G4N745	Acetyl-CoA acetyltransferase OS=Magnaporthe oryzae (strain 70-15 / ATCC MYA-4617 / FGSC 8958) GN=MGG_13499 PE=3 SV=1 - [G4N745_MAGO7]	38.15	2	13	13	49	401	401	41.4505	6.97607
A4RGA1	Signal peptidase complex catalytic subunit SEC11 OS=Magnaporthe oryzae (strain 70-15 / ATCC MYA-4617 / FGSC 8958) GN=SEC11 PE=3 SV=1 - [SEC11_MAGO7]	51.74	2	8	8	32	172	172	19.031	7.40088
Q525S7	Protein SEY1 OS=Magnaporthe oryzae (strain 70-15 / ATCC MYA-4617 / FGSC 8958) GN=SEY1 PE=3 SV=1 - [SEY1_MAGO7]	25.24	1	17	17	40	848	848	95.3818	5.40186
G4NF56	Reticulon-like protein OS=Magnaporthe oryzae (strain P131) GN=OOW_P131scaffold01393g57 PE=4 SV=1 - [L7ISZ2_MAGOP]	41.05	1	9	9	29	324	324	34.943	6.80029
G4MMG3	40S ribosomal protein S21 OS=Magnaporthe oryzae PE=2 SV=1 - [D4NXG3_MAGOR]	44.83	1	4	4	24	87	87	9.58187	7.29834
G4MTP1	AMP-binding enzyme OS=Magnaporthe oryzae (strain 70-15 / ATCC MYA-4617 / FGSC 8958) GN=MGG_07197 PE=4 SV=1 - [G4MTP1_MAGO7]	29.99	1	17	17	49	707	707	78.5591	8.36768
G4NE45	Succinate dehydrogenase [ubiquinone] iron-sulfur subunit, mitochondrial OS=Magnaporthe oryzae (strain 70-15 / ATCC MYA-4617 / FGSC 8958) GN=MGG_00167 PE=3 SV=1 - [G4NE45_MAGO7]	26.28	2	8	8	48	274	274	31.2847	8.95361
G4N6Y9	2-amino-3-carboxymuconate-6-semialdehyde decarboxylase OS=Magnaporthe oryzae (strain P131) GN=OOW_P131scaffold01381g9 PE=4 SV=1 - [L7IU46_MAGOP]	32.11	1	10	10	27	383	383	41.3351	6.07471
G4N913	Transaldolase OS=Magnaporthe oryzae (strain Y34) GN=OOU_Y34scaffold01019g6 PE=4 SV=1 - [L7HPG9_MAGOY]	20	3	7	7	33	345	345	37.6941	6.25244
G4MV39	Pyruvate dehydrogenase complex protein X component OS=Magnaporthe oryzae (strain Y34) GN=OOU_Y34scaffold00228g39 PE=4 SV=1 - [L7IFU8_MAGOY]	47.38	3	13	13	37	439	439	46.3253	6.7417
G4NEN1	Indoleamine 2,3-dioxygenase OS=Magnaporthe oryzae (strain 70-15 / ATCC MYA-4617 / FGSC 8958) GN=MGG_00755 PE=4 SV=1 - [G4NEN1_MAGO7]	16.1	1	7	7	19	497	497	55.8073	5.40186
G4NFS4	Carboxylic ester hydrolase OS=Magnaporthe oryzae (strain P131) GN=OOW_P131scaffold00152g10 PE=3 SV=1 - [L7JPK0_MAGOP]	22.5	2	10	10	31	529	529	57.0332	5.2749
G5EH30	PLA2 protein OS=Magnaporthe oryzae GN=PLA2 PE=2 SV=1 - [F8SM03_MAGOR]	25.97	1	17	17	40	797	797	85.4878	5.75732
G4MNN7	Glycoside hydrolase OS=Magnaporthe oryzae (strain P131) GN=OOW_P131scaffold00485g6 PE=3 SV=1 - [L7JBA4_MAGOP]	28.48	2	19	19	34	825	825	94.1938	6.06201
G4MP03	A-factor-processing enzyme OS=Magnaporthe oryzae (strain 70-15 / ATCC MYA-4617 / FGSC 8958) GN=MGG_13149 PE=4 SV=1 - [G4MP03_MAGO7]	25.75	3	29	29	74	1126	1126	129.479	6.16357
G4NDR0	26S proteasome non-ATPase regulatory subunit 3 OS=Magnaporthe oryzae (strain 70-15 / ATCC MYA-4617 / FGSC 8958) GN=MGG_00884 PE=4 SV=1 - [G4NDR0_MAGO7]	23.34	1	10	10	32	557	557	62.3653	6.50732
G4NBZ0	Alpha-N-arabinofuranosidase A OS=Magnaporthe oryzae (strain 70-15 / ATCC MYA-4617 / FGSC 8958) GN=MGG_01147 PE=4 SV=1 - [G4NBZ0_MAGO7]	19.49	1	11	11	41	667	667	73.5885	5.23682
G4NG01	Uncharacterized protein OS=Magnaporthe oryzae (strain 70-15 / ATCC MYA-4617 / FGSC 8958) GN=MGG_01944 PE=4 SV=1 - [G4NG01_MAGO7]	14.78	1	2	2	21	230	230	25.4244	4.91943
G4NEL0	5-oxoprolinase OS=Magnaporthe oryzae (strain 70-15 / ATCC MYA-4617 / FGSC 8958) GN=MGG_00771 PE=4 SV=1 - [G4NEL0_MAGO7]	23.11	2	27	27	50	1376	1376	150.625	5.59229
G4N8F9	Eukaryotic peptide chain release factor subunit 1 OS=Magnaporthe oryzae (strain 70-15 / ATCC MYA-4617 / FGSC 8958) GN=MGG_06266 PE=4 SV=1 - [G4N8F9_MAGO7]	26.67	1	9	9	29	435	435	48.6738	5.31299
G4MXC5	Mitochondrial peroxiredoxin PRX1 OS=Magnaporthe oryzae (strain 70-15 / ATCC MYA-4617 / FGSC 8958) GN=MGG_08256 PE=4 SV=1 - [G4MXC5_MAGO7]	55.8	1	11	11	48	224	224	25.123	6.07471
G4MUB5	Uroporphyrinogen decarboxylase OS=Magnaporthe oryzae (strain 70-15 / ATCC MYA-4617 / FGSC 8958) GN=MGG_01622 PE=3 SV=1 - [G4MUB5_MAGO7]	38.42	1	13	13	50	367	367	41.5513	6.13818
G5EHG3	Glycine dehydrogenase OS=Magnaporthe oryzae (strain 70-15 / ATCC MYA-4617 / FGSC 8958) GN=MGCH7_ch7g895 PE=4 SV=1 - [G5EHG3_MAGO7]	16.79	1	15	15	44	1084	1084	117.942	6.96143
G5EHZ1	Proline-specific permease OS=Magnaporthe oryzae (strain 70-15 / ATCC MYA-4617 / FGSC 8958) GN=MGCH7_ch7g663 PE=4 SV=1 - [G5EHZ1_MAGO7]	13.04	1	7	7	21	560	560	61.5315	9.11475
G4MY97	Cell wall biogenesis protein phosphatase Ssd1 OS=Magnaporthe oryzae (strain 70-15 / ATCC MYA-4617 / FGSC 8958) GN=MGG_08084 PE=4 SV=1 - [G4MY97_MAGO7]	17.48	1	19	20	57	1350	1350	147.933	7.06396
G4NH22	Probable ribosomal protein L26 OS=Magnaporthe oryzae PE=2 SV=1 - [D4NXH7_MAGOR]	49.64	2	8	8	68	137	137	15.4366	10.6675
G4N954	Methylglutaconyl-CoA hydratase OS=Magnaporthe oryzae (strain 70-15 / ATCC MYA-4617 / FGSC 8958) GN=MGG_03335 PE=4 SV=1 - [G4N954_MAGO7]	42.98	1	13	13	44	349	349	37.4828	8.5874
G4N349	Ribosomal protein L23 OS=Magnaporthe oryzae PE=2 SV=1 - [D4NXH0_MAGOR]	42.45	1	5	5	41	139	139	14.6289	10.3306
G4MMC7	Peptide transporter PTR2 OS=Magnaporthe oryzae (strain P131) GN=OOW_P131scaffold01155g22 PE=4 SV=1 - [L7J2I7_MAGOP]	16.51	1	10	10	38	624	624	68.6622	7.82568
G4NGM5	Uncharacterized protein OS=Magnaporthe oryzae (strain 70-15 / ATCC MYA-4617 / FGSC 8958) GN=MGG_14917 PE=4 SV=1 - [G4NGM5_MAGO7]	53.64	2	11	11	27	343	343	36.3675	5.24951
G4MRI0	Leucyl-tRNA synthetase OS=Magnaporthe oryzae (strain P131) GN=OOW_P131scaffold01116g5 PE=4 SV=1 - [L7J1N9_MAGOP]	12.8	2	11	11	25	1125	1125	126.922	6.58057
Q2KEQ8	Putative uncharacterized protein OS=Magnaporthe oryzae (strain 70-15 / ATCC MYA-4617 / FGSC 8958) GN=MGCH7_ch7g978 PE=4 SV=1 - [Q2KEQ8_MAGO7]	22.66	2	7	7	30	353	353	37.1967	5.47803
G4NHH7	Ser/Thr protein phosphatase family protein OS=Magnaporthe oryzae (strain P131) GN=OOW_P131scaffold01331g51 PE=4 SV=1 - [L7IX01_MAGOP]	26.02	2	12	12	22	688	688	72.9427	9.1001
G4ML84	60S ribosomal protein L27a OS=Magnaporthe oryzae (strain P131) GN=OOW_P131scaffold00177g10 PE=3 SV=1 - [L7JNV5_MAGOP]	37.33	1	6	6	49	150	150	16.814	10.4038
G4N2D1	Uncharacterized protein OS=Magnaporthe oryzae (strain 70-15 / ATCC MYA-4617 / FGSC 8958) GN=MGG_07901 PE=4 SV=1 - [G4N2D1_MAGO7]	19.81	1	4	4	22	212	212	23.1591	5.10986
G4MM69	Endo-1,3(4)-beta-glucanase 1 OS=Magnaporthe oryzae (strain 70-15 / ATCC MYA-4617 / FGSC 8958) GN=MGG_05489 PE=4 SV=1 - [G4MM69_MAGO7]	21.9	3	14	14	26	790	790	86.2902	9.0708
G4N6Q8	Uncharacterized protein OS=Magnaporthe oryzae (strain P131) GN=OOW_P131scaffold01168g35 PE=4 SV=1 - [L7J197_MAGOP]	33.1	1	7	7	31	281	281	30.3272	9.45166
G4MXN0	Phosphoribosylaminoimidazole carboxylase OS=Magnaporthe oryzae (strain 70-15 / ATCC MYA-4617 / FGSC 8958) GN=MGG_01256 PE=3 SV=1 - [G4MXN0_MAGO7]	10.25	3	5	5	24	605	605	65.6921	6.84424
G5EI58	CK1/CK1/CK1-D protein kinase OS=Magnaporthe oryzae (strain 70-15 / ATCC MYA-4617 / FGSC 8958) GN=MGCH7_ch7g585 PE=3 SV=1 - [G5EI58_MAGO7]	18.26	1	6	6	29	356	356	40.8989	9.39307
G4NEQ1	Choline dehydrogenase OS=Magnaporthe oryzae (strain P131) GN=OOW_P131scaffold00389g21 PE=4 SV=1 - [L7JEC6_MAGOP]	20.03	3	10	10	30	674	674	72.2683	5.30029
G4N2P1	Cysteinyl-tRNA synthetase OS=Magnaporthe oryzae (strain P131) GN=OOW_P131scaffold00314g9 PE=3 SV=1 - [L7JGV4_MAGOP]	28.14	2	17	17	36	803	803	89.5772	6.26514
G4N683	Phospho-2-dehydro-3-deoxyheptonate aldolase OS=Magnaporthe oryzae (strain P131) GN=OOW_P131scaffold01302g33 PE=3 SV=1 - [L7IWJ6_MAGOP]	23.39	1	10	10	30	466	466	52.0386	6.44287
G4ND07	Carboxypeptidase S OS=Magnaporthe oryzae (strain 70-15 / ATCC MYA-4617 / FGSC 8958) GN=MGG_00309 PE=4 SV=1 - [G4ND07_MAGO7]	20.67	1	8	8	20	595	595	64.9389	6.41748
G5EHP6	26S proteasome regulatory subunit RPN5 OS=Magnaporthe oryzae (strain 70-15 / ATCC MYA-4617 / FGSC 8958) GN=MGCH7_ch7g327 PE=4 SV=1 - [G5EHP6_MAGO7]	32.15	1	16	16	48	507	507	57.9086	7.32764
G4MYI6	Cystathionine-gamma-lyase OS=Magnaporthe oryzae (strain 70-15 / ATCC MYA-4617 / FGSC 8958) GN=MGG_10380 PE=3 SV=1 - [G4MYI6_MAGO7]	26.53	1	7	7	22	426	426	45.1458	6.60986
Q2KGD9	Putative uncharacterized protein OS=Magnaporthe oryzae (strain 70-15 / ATCC MYA-4617 / FGSC 8958) GN=MGCH7_ch7g396 PE=4 SV=1 - [Q2KGD9_MAGO7]	17.27	3	8	8	30	579	579	63.5037	9.43701
G4MQH4	Carboxypeptidase S1 OS=Magnaporthe oryzae (strain 70-15 / ATCC MYA-4617 / FGSC 8958) GN=MGG_02309 PE=3 SV=1 - [G4MQH4_MAGO7]	23.66	2	11	11	39	634	634	69.6531	5.42725
G4NKP8	Hydrolase OS=Magnaporthe oryzae (strain 70-15 / ATCC MYA-4617 / FGSC 8958) GN=MGG_10572 PE=4 SV=1 - [G4NKP8_MAGO7]	32.68	3	7	7	25	306	306	32.9387	5.88428
G4NIA1	Uncharacterized protein OS=Magnaporthe oryzae (strain 70-15 / ATCC MYA-4617 / FGSC 8958) GN=MGG_17822 PE=4 SV=1 - [G4NIA1_MAGO7]	20.97	1	7	7	25	434	434	47.2414	5.89697
G5EH95	Methylcrotonoyl-CoA carboxylase subunit beta OS=Magnaporthe oryzae (strain 70-15 / ATCC MYA-4617 / FGSC 8958) GN=MGCH7_ch7g257 PE=4 SV=1 - [G5EH95_MAGO7]	23.31	1	11	11	26	605	605	64.9922	8.79248
G4MPA1	Nucleolar protein nop-58 OS=Magnaporthe oryzae (strain 70-15 / ATCC MYA-4617 / FGSC 8958) GN=MGG_07008 PE=4 SV=1 - [G4MPA1_MAGO7]	22.54	2	12	12	42	599	599	65.1404	8.83643
G4MUU8	Uncharacterized protein OS=Magnaporthe oryzae (strain P131) GN=OOW_P131scaffold00133g9 PE=4 SV=1 - [L7JNM2_MAGOP]	7.23	1	7	7	27	1023	1023	112.958	4.65283
G4ND85	Laccase-2 OS=Magnaporthe oryzae (strain 70-15 / ATCC MYA-4617 / FGSC 8958) GN=MGG_11608 PE=3 SV=1 - [G4ND85_MAGO7]	18.26	2	10	10	44	597	597	65.3449	5.96045
G4MTG9	3-isopropylmalate dehydratase OS=Magnaporthe oryzae (strain P131) GN=OOW_P131scaffold01457g9 PE=3 SV=1 - [L7IUE5_MAGOP]	30.59	1	20	20	46	778	778	84.3708	6.18896
G4N4I7	Endoribonuclease L-PSP OS=Magnaporthe oryzae (strain 70-15 / ATCC MYA-4617 / FGSC 8958) GN=MGG_05968 PE=4 SV=1 - [G4N4I7_MAGO7]	43.38	2	5	5	25	136	136	15.1405	4.99561
G4N9J7	Xanthine dehydrogenase OS=Magnaporthe oryzae (strain P131) GN=OOW_P131scaffold01311g40 PE=4 SV=1 - [L7IX11_MAGOP]	19.36	2	23	23	43	1353	1353	148.338	6.62451
G4NC12	Agmatinase OS=Magnaporthe oryzae (strain 70-15 / ATCC MYA-4617 / FGSC 8958) GN=MGG_11574 PE=3 SV=1 - [G4NC12_MAGO7]	25.13	1	8	8	27	398	398	43.0806	5.65576
G4NDZ5	Succinyl-CoA:3-ketoacid-coenzyme A transferase OS=Magnaporthe oryzae (strain 70-15 / ATCC MYA-4617 / FGSC 8958) GN=MGG_11480 PE=3 SV=1 - [G4NDZ5_MAGO7]	22.62	2	9	9	22	526	526	55.9399	8.5874
A4R0E5	Eukaryotic translation initiation factor 3 subunit F OS=Magnaporthe oryzae (strain 70-15 / ATCC MYA-4617 / FGSC 8958) GN=MGG_10653 PE=3 SV=1 - [EIF3F_MAGO7]	20.27	1	7	7	24	370	370	40.3632	5.08447
G4MZE8	Translocation protein sec66 OS=Magnaporthe oryzae (strain P131) GN=OOW_P131scaffold01166g16 PE=4 SV=1 - [L7J293_MAGOP]	30.53	1	6	6	17	262	262	28.6937	6.81494
G4MU23	Versicolorin reductase OS=Magnaporthe oryzae (strain P131) GN=OOW_P131scaffold01275g14 PE=4 SV=1 - [L7IXH0_MAGOP]	44.16	1	10	11	39	274	274	28.6195	6.90283
G4MUN3	60S ribosomal protein L23a OS=Magnaporthe oryzae (strain 70-15 / ATCC MYA-4617 / FGSC 8958) GN=MGG_10185 PE=3 SV=1 - [G4MUN3_MAGO7]	42.68	1	6	6	43	157	157	17.3728	10.272
G4N530	Ran-specific GTPase-activating protein 1 OS=Magnaporthe oryzae (strain 70-15 / ATCC MYA-4617 / FGSC 8958) GN=MGG_05203 PE=4 SV=1 - [G4N530_MAGO7]	30.77	2	6	6	20	247	247	26.9644	5.10986
G5EHM5	Dolichyl-phosphate-mannose-protein mannosyltransferase 1 OS=Magnaporthe oryzae (strain 70-15 / ATCC MYA-4617 / FGSC 8958) GN=MGCH7_ch7g727 PE=4 SV=1 - [G5EHM5_MAGO7]	23.07	1	18	18	61	997	997	111.209	7.73779
G4MX76	5'-nucleotidase OS=Magnaporthe oryzae (strain 70-15 / ATCC MYA-4617 / FGSC 8958) GN=MGG_12474 PE=3 SV=1 - [G4MX76_MAGO7]	20.14	2	8	8	44	556	556	60.5854	5.33838
G4N5G6	Aminobenzoyl-glutamate utilization protein B OS=Magnaporthe oryzae (strain 70-15 / ATCC MYA-4617 / FGSC 8958) GN=MGG_09071 PE=4 SV=1 - [G4N5G6_MAGO7]	29.1	2	9	9	36	409	409	44.3981	6.21436
G4MLQ3	Uncharacterized protein OS=Magnaporthe oryzae (strain P131) GN=OOW_P131scaffold00691g2 PE=4 SV=1 - [L7J7P7_MAGOP]	17.23	1	10	10	34	714	714	78.7925	6.63916
G4MLT1	Uncharacterized protein OS=Magnaporthe oryzae (strain 70-15 / ATCC MYA-4617 / FGSC 8958) GN=MGG_05456 PE=4 SV=1 - [G4MLT1_MAGO7]	20.1	1	2	2	10	194	194	17.9498	7.50342
G4MNE6	Calcineurin subunit B OS=Magnaporthe oryzae PE=2 SV=1 - [D4NXF5_MAGOR]	37.93	2	5	5	19	174	174	19.6397	4.62744
G4MSB4	ADP-ribosylation factor OS=Magnaporthe oryzae (strain 70-15 / ATCC MYA-4617 / FGSC 8958) GN=MGG_04438 PE=3 SV=1 - [G4MSB4_MAGO7]	56.28	1	7	8	38	183	183	20.9309	6.80029
G4MZQ9	Neutral ceramidase OS=Magnaporthe oryzae (strain 70-15 / ATCC MYA-4617 / FGSC 8958) GN=MGG_07051 PE=4 SV=1 - [G4MZQ9_MAGO7]	17.08	2	13	14	36	837	837	91.2083	6.50732
G4N8C1	Trehalose-phosphatase OS=Magnaporthe oryzae (strain 70-15 / ATCC MYA-4617 / FGSC 8958) GN=MGG_03441 PE=4 SV=1 - [G4N8C1_MAGO7]	11.76	3	10	10	34	1020	1020	113.208	6.12549
G4MZK5	mRNA decapping hydrolase OS=Magnaporthe oryzae (strain 70-15 / ATCC MYA-4617 / FGSC 8958) GN=MGG_15696 PE=4 SV=1 - [G4MZK5_MAGO7]	36.22	1	9	9	23	323	323	36.8498	6.15088
G4MPE2	60S ribosomal protein L17 OS=Magnaporthe oryzae PE=2 SV=1 - [D4NXB5_MAGOR]	25.27	1	5	5	31	186	186	20.878	10.2427
G4MNF5	Serine/threonine-protein phosphatase OS=Magnaporthe oryzae (strain P131) GN=OOW_P131scaffold01014g10 PE=3 SV=1 - [L7J4B1_MAGOP]	12.34	1	5	5	17	478	478	54.302	6.0874
G4NAL1	Fatty acyl-CoA hydrolase OS=Magnaporthe oryzae (strain 70-15 / ATCC MYA-4617 / FGSC 8958) GN=MGG_08468 PE=4 SV=1 - [G4NAL1_MAGO7]	27.69	1	13	13	33	549	549	60.7035	5.03369
G5EGY9	Sterol 24-C-methyltransferase OS=Magnaporthe oryzae (strain 70-15 / ATCC MYA-4617 / FGSC 8958) GN=MGCH7_ch7g116 PE=3 SV=1 - [G5EGY9_MAGO7]	48.68	1	13	13	47	380	380	42.403	6.25244
G4N564	Survival factor 1 OS=Magnaporthe oryzae (strain 70-15 / ATCC MYA-4617 / FGSC 8958) GN=MGG_06072 PE=4 SV=1 - [G4N564_MAGO7]	21.59	1	7	7	20	389	389	42.8049	6.15088
G5EH26	Zuotin OS=Magnaporthe oryzae (strain 70-15 / ATCC MYA-4617 / FGSC 8958) GN=MGCH7_ch7g113 PE=4 SV=1 - [G5EH26_MAGO7]	23.42	1	8	8	25	444	444	50.3971	9.20264
G4NCX8	Uncharacterized protein OS=Magnaporthe oryzae (strain 70-15 / ATCC MYA-4617 / FGSC 8958) GN=MGG_00333 PE=4 SV=1 - [G4NCX8_MAGO7]	20.41	1	6	6	21	343	343	37.5743	7.09326
G4MR44	40S ribosomal protein S28 OS=Magnaporthe oryzae (strain 70-15 / ATCC MYA-4617 / FGSC 8958) GN=MGG_09894 PE=3 SV=1 - [G4MR44_MAGO7]	30.88	1	2	2	17	68	68	7.71328	11.1216
G4MTV8	26S protease regulatory subunit 7 OS=Magnaporthe oryzae (strain 70-15 / ATCC MYA-4617 / FGSC 8958) GN=MGG_01581 PE=3 SV=1 - [G4MTV8_MAGO7]	34.85	1	15	15	53	439	439	49.0453	6.30322
G4NF25	Integral membrane protein OS=Magnaporthe oryzae (strain Y34) GN=OOU_Y34scaffold00723g3 PE=4 SV=1 - [L7HW49_MAGOY]	8.18	2	5	5	30	587	587	62.7798	8.89502
G4N561	Hsp10-like protein OS=Magnaporthe oryzae (strain 70-15 / ATCC MYA-4617 / FGSC 8958) GN=MGG_13221 PE=3 SV=1 - [G4N561_MAGO7]	61.54	1	6	6	33	104	104	11.2221	9.0415
A4REK3	Protein transport protein SEC13 OS=Magnaporthe oryzae (strain 70-15 / ATCC MYA-4617 / FGSC 8958) GN=SEC13 PE=3 SV=3 - [SEC13_MAGO7]	26.64	1	7	7	21	289	289	31.8956	6.21436
G4N3J5	E3 ubiquitin ligase complex SCF subunit scon-3 OS=Magnaporthe oryzae (strain 70-15 / ATCC MYA-4617 / FGSC 8958) GN=MGG_04978 PE=3 SV=1 - [G4N3J5_MAGO7]	33.33	1	4	4	12	168	168	19.3515	4.65283
G4MVL0	Asparaginyl-tRNA synthetase OS=Magnaporthe oryzae (strain P131) GN=OOW_P131scaffold01214g24 PE=4 SV=1 - [L7IYA9_MAGOP]	29.35	1	14	14	30	586	586	66.0127	6.13818
G4MS62	Proteasome component PUP3 OS=Magnaporthe oryzae (strain P131) GN=OOW_P131scaffold01138g43 PE=4 SV=1 - [L7J274_MAGOP]	22.92	2	3	3	18	192	192	21.1597	5.40186
G4MPU8	DnaJ domain protein OS=Magnaporthe oryzae (strain P131) GN=OOW_P131scaffold00417g24 PE=4 SV=1 - [L7JDB0_MAGOP]	21.3	1	6	6	20	540	540	58.0193	5.38916
G4MRY8	Vitamin H transporter 1/biotin symporter vht1 OS=Magnaporthe oryzae (strain 70-15 / ATCC MYA-4617 / FGSC 8958) GN=MGG_02475 PE=4 SV=1 - [G4MRY8_MAGO7]	15.05	2	6	6	28	545	545	59.9133	9.34912
G4MX57	UDP-glucose 4-epimerase OS=Magnaporthe oryzae (strain P131) GN=OOW_P131scaffold00062g8 PE=3 SV=1 - [L7JQY0_MAGOP]	35.23	1	11	11	22	369	369	40.5886	6.30322
G4N3R4	Root-specific lectin OS=Magnaporthe oryzae (strain P131) GN=OOW_P131scaffold00273g9 PE=4 SV=1 - [L7JJG9_MAGOP]	7.59	2	9	9	27	1159	1159	117.805	6.96143
G4N512	Uncharacterized protein OS=Magnaporthe oryzae (strain P131) GN=OOW_P131scaffold00982g83 PE=4 SV=1 - [L7J7K1_MAGOP]	29.18	1	10	10	34	449	449	50.3624	8.88037
G4MP14	Coatomer subunit delta OS=Magnaporthe oryzae (strain P131) GN=OOW_P131scaffold01194g21 PE=3 SV=1 - [L7IZE1_MAGOP]	15.18	2	6	6	27	514	514	57.2427	5.24951
G4N0X3	Chitin synthase 5 OS=Magnaporthe oryzae GN=CHS5 PE=2 SV=1 - [G4XVC0_MAGOR]	4.98	2	6	7	12	1787	1787	197.509	5.99854
G4NIJ6	Uncharacterized protein OS=Magnaporthe oryzae (strain P131) GN=OOW_P131scaffold01376g6 PE=3 SV=1 - [L7ITJ2_MAGOP]	20.58	1	8	8	36	452	452	48.3264	5.12256
G5EHA8	Alpha-amylase 1 OS=Magnaporthe oryzae (strain 70-15 / ATCC MYA-4617 / FGSC 8958) GN=MGCH7_ch7g65 PE=4 SV=1 - [G5EHA8_MAGO7]	26.32	1	12	12	54	532	532	58.6775	6.12549
G4N604	Sorting nexin mvp-1 OS=Magnaporthe oryzae (strain P131) GN=OOW_P131scaffold01296g18 PE=4 SV=1 - [L7IWP5_MAGOP]	10	1	10	10	28	780	780	86.1342	6.48096
G4NCZ7	Fumarylacetoacetase OS=Magnaporthe oryzae (strain P131) GN=OOW_P131scaffold00220g79 PE=4 SV=1 - [L7JKG1_MAGOP]	38.44	1	11	11	33	437	437	47.7811	5.84619
G4N7U6	Uncharacterized protein OS=Magnaporthe oryzae (strain 70-15 / ATCC MYA-4617 / FGSC 8958) GN=MGG_06359 PE=4 SV=1 - [G4N7U6_MAGO7]	29.96	1	7	7	26	247	247	27.0937	7.78174
G4N1Q3	Centromere/microtubule-binding protein cbf5 OS=Magnaporthe oryzae (strain 70-15 / ATCC MYA-4617 / FGSC 8958) GN=MGG_07518 PE=4 SV=1 - [G4N1Q3_MAGO7]	34.64	1	12	12	43	485	485	53.858	8.17725
G4NGM6	Uncharacterized protein OS=Magnaporthe oryzae (strain 70-15 / ATCC MYA-4617 / FGSC 8958) GN=MGG_04085 PE=4 SV=1 - [G4NGM6_MAGO7]	20.32	2	13	13	27	694	694	78.8217	5.04639
G4N2S9	Uncharacterized protein OS=Magnaporthe oryzae (strain P131) GN=OOW_P131scaffold00314g46 PE=4 SV=1 - [L7JHB8_MAGOP]	29.69	1	10	10	33	384	384	43.1472	5.17334
G4MXQ4	Bilirubin oxidase OS=Magnaporthe oryzae (strain 70-15 / ATCC MYA-4617 / FGSC 8958) GN=MGG_08046 PE=3 SV=1 - [G4MXQ4_MAGO7]	31.77	1	15	15	43	620	620	69.5355	7.50342
G4NEK0	Choline dehydrogenase OS=Magnaporthe oryzae (strain 70-15 / ATCC MYA-4617 / FGSC 8958) GN=MGG_00779 PE=4 SV=1 - [G4NEK0_MAGO7]	25.23	2	13	13	36	646	646	69.4967	6.43018
A4R796	Eukaryotic translation initiation factor 3 subunit E OS=Magnaporthe oryzae (strain 70-15 / ATCC MYA-4617 / FGSC 8958) GN=INT6 PE=3 SV=1 - [EIF3E_MAGO7]	37	1	12	12	27	446	446	51.459	5.18604
G4N7V9	Vacuolar ATP synthase subunit C 1 OS=Magnaporthe oryzae (strain 70-15 / ATCC MYA-4617 / FGSC 8958) GN=MGG_06349 PE=4 SV=1 - [G4N7V9_MAGO7]	33.42	3	13	13	31	392	392	43.9418	7.45947
G4NC99	Ornithine carbamoyltransferase OS=Magnaporthe oryzae (strain 70-15 / ATCC MYA-4617 / FGSC 8958) GN=MGG_01102 PE=3 SV=1 - [G4NC99_MAGO7]	27.64	1	7	7	19	351	351	37.324	7.72314
G4MY42	Uncharacterized protein OS=Magnaporthe oryzae (strain 70-15 / ATCC MYA-4617 / FGSC 8958) GN=MGG_01267 PE=4 SV=1 - [G4MY42_MAGO7]	62.86	2	6	6	21	105	105	12.1442	8.39697
G4MVP2	Uncharacterized protein OS=Magnaporthe oryzae (strain 70-15 / ATCC MYA-4617 / FGSC 8958) GN=MGG_01764 PE=4 SV=1 - [G4MVP2_MAGO7]	37.05	1	8	8	31	278	278	31.1543	6.94678
G4N5Q6	Integral membrane protein OS=Magnaporthe oryzae (strain 70-15 / ATCC MYA-4617 / FGSC 8958) GN=MGG_05292 PE=3 SV=1 - [G4N5Q6_MAGO7]	25.45	2	6	6	21	279	279	30.2961	10.228
G5EGW6	Uncharacterized protein OS=Magnaporthe oryzae (strain 70-15 / ATCC MYA-4617 / FGSC 8958) GN=MGCH7_ch7g1060 PE=4 SV=1 - [G5EGW6_MAGO7]	25.17	1	4	4	27	151	151	16.5764	5.8208
G4N7S0	Uncharacterized protein OS=Magnaporthe oryzae (strain 70-15 / ATCC MYA-4617 / FGSC 8958) GN=MGG_03525 PE=4 SV=1 - [G4N7S0_MAGO7]	41.6	1	12	12	32	375	375	42.4969	8.08936
Q2KFG4	Putative uncharacterized protein OS=Magnaporthe oryzae (strain 70-15 / ATCC MYA-4617 / FGSC 8958) GN=MGCH7_ch7g722 PE=4 SV=1 - [Q2KFG4_MAGO7]	21.38	2	18	18	37	1043	1043	117.75	5.65576
G4MTA0	Alpha-galactosidase OS=Magnaporthe oryzae (strain 70-15 / ATCC MYA-4617 / FGSC 8958) GN=MGG_11374 PE=3 SV=1 - [G4MTA0_MAGO7]	29.49	2	9	9	29	512	512	55.8955	5.46533
G4NDG8	GMP synthase OS=Magnaporthe oryzae (strain 70-15 / ATCC MYA-4617 / FGSC 8958) GN=MGG_00919 PE=3 SV=1 - [G4NDG8_MAGO7]	31.12	2	15	15	39	543	543	60.2338	6.40479
G4MP57	Iron transport multicopper oxidase FET5 OS=Magnaporthe oryzae (strain 70-15 / ATCC MYA-4617 / FGSC 8958) GN=MGG_02156 PE=3 SV=1 - [G4MP57_MAGO7]	22.2	1	10	10	35	599	599	65.5258	6.11279
G4N363	Peptide transporter PTR2-A OS=Magnaporthe oryzae (strain P131) GN=OOW_P131scaffold00314g81 PE=3 SV=1 - [L7JHE5_MAGOP]	17.53	1	9	9	34	639	639	69.656	6.56592
G4NLC7	60S ribosomal protein L21-B OS=Magnaporthe oryzae (strain 70-15 / ATCC MYA-4617 / FGSC 8958) GN=MGG_02953 PE=4 SV=1 - [G4NLC7_MAGO7]	31.25	2	6	6	44	160	160	18.22	10.7261
G4MS34	Coatomer subunit beta OS=Magnaporthe oryzae (strain P131) GN=OOW_P131scaffold00659g4 PE=4 SV=1 - [L7J7V2_MAGOP]	15.67	1	11	11	30	855	855	95.3641	4.80518
G4MNG8	CAAX prenyl protease 1 OS=Magnaporthe oryzae (strain 70-15 / ATCC MYA-4617 / FGSC 8958) GN=MGG_06951 PE=4 SV=1 - [G4MNG8_MAGO7]	27.89	2	12	12	37	459	459	52.8322	9.26123
G4N627	Uncharacterized protein OS=Magnaporthe oryzae (strain 70-15 / ATCC MYA-4617 / FGSC 8958) GN=MGG_06605 PE=4 SV=1 - [G4N627_MAGO7]	8.91	1	4	4	19	516	516	55.7612	6.37939
G4N9I1	Alpha-mannosidase OS=Magnaporthe oryzae (strain 70-15 / ATCC MYA-4617 / FGSC 8958) GN=MGG_12735 PE=3 SV=1 - [G4N9I1_MAGO7]	6.27	2	3	6	23	1100	1100	122.552	5.90967
G4MQZ3	Alcohol dehydrogenase OS=Magnaporthe oryzae (strain 70-15 / ATCC MYA-4617 / FGSC 8958) GN=MGG_02371 PE=4 SV=1 - [G4MQZ3_MAGO7]	30.79	1	15	15	35	669	669	73.1206	4.77979
G4NFA4	Glycosyl hydrolase OS=Magnaporthe oryzae (strain 70-15 / ATCC MYA-4617 / FGSC 8958) GN=MGG_04172 PE=4 SV=1 - [G4NFA4_MAGO7]	24.5	2	17	17	39	747	747	80.5114	6.55127
A4R2S1	Cyanate hydratase OS=Magnaporthe oryzae (strain 70-15 / ATCC MYA-4617 / FGSC 8958) GN=CYN1 PE=3 SV=2 - [CYNS_MAGO7]	45.06	2	6	6	30	162	162	17.927	5.63037
G4N178	Glutathione peroxidase OS=Magnaporthe oryzae (strain 70-15 / ATCC MYA-4617 / FGSC 8958) GN=MGG_07460 PE=3 SV=1 - [G4N178_MAGO7]	45.93	2	8	8	29	172	172	19.2989	7.79639
G4MT58	Orotate phosphoribosyltransferase OS=Magnaporthe oryzae (strain 70-15 / ATCC MYA-4617 / FGSC 8958) GN=MGG_07135 PE=3 SV=1 - [G4MT58_MAGO7]	47.64	2	8	8	22	233	233	25.2693	6.94678
G4MY94	Peptidyl-prolyl cis-trans isomerase OS=Magnaporthe oryzae (strain 70-15 / ATCC MYA-4617 / FGSC 8958) GN=MGG_15814 PE=3 SV=1 - [G4MY94_MAGO7]	38.65	1	1	7	37	207	207	22.8607	8.32373
G4NAT0	Uncharacterized protein OS=Magnaporthe oryzae (strain 70-15 / ATCC MYA-4617 / FGSC 8958) GN=MGG_12766 PE=4 SV=1 - [G4NAT0_MAGO7]	16.09	3	16	16	34	1038	1038	120.167	6.0874
G4N2E5	Uncharacterized protein OS=Magnaporthe oryzae (strain 70-15 / ATCC MYA-4617 / FGSC 8958) GN=MGG_07915 PE=4 SV=1 - [G4N2E5_MAGO7]	28.79	2	13	13	35	514	514	56.8876	8.92432
G4NHG1	Aldose 1-epimerase OS=Magnaporthe oryzae (strain 70-15 / ATCC MYA-4617 / FGSC 8958) GN=MGG_03853 PE=4 SV=1 - [G4NHG1_MAGO7]	36.26	1	10	10	38	342	342	36.7776	5.43994
G4NIH0	Uncharacterized protein OS=Magnaporthe oryzae (strain P131) GN=OOW_P131scaffold00160g3 PE=4 SV=1 - [L7JMA5_MAGOP]	20	1	2	2	20	170	170	18.3267	5.021
G4N168	Serine/threonine-protein phosphatase OS=Magnaporthe oryzae (strain Y34) GN=OOU_Y34scaffold00552g84 PE=3 SV=1 - [L7I4I5_MAGOY]	24.05	2	11	11	39	578	578	65.7485	5.49072
G4MYY2	Tubulin alpha chain OS=Magnaporthe oryzae (strain 70-15 / ATCC MYA-4617 / FGSC 8958) GN=MGG_11412 PE=3 SV=1 - [G4MYY2_MAGO7]	28.85	1	10	10	33	454	454	50.3589	5.10986
G4NHQ0	Uncharacterized protein OS=Magnaporthe oryzae (strain 70-15 / ATCC MYA-4617 / FGSC 8958) GN=MGG_03761 PE=4 SV=1 - [G4NHQ0_MAGO7]	9.7	2	10	10	19	1639	1639	170.053	6.17627
G4N5E5	Uracil phosphoribosyltransferase OS=Magnaporthe oryzae (strain 70-15 / ATCC MYA-4617 / FGSC 8958) GN=MGG_05252 PE=4 SV=1 - [G4N5E5_MAGO7]	41.05	2	6	6	28	229	229	24.5029	5.59229
G4MYZ4	Actin-related protein 2/3 complex subunit 1A OS=Magnaporthe oryzae (strain P131) GN=OOW_P131scaffold01075g13 PE=4 SV=1 - [L7J2J5_MAGOP]	25.07	1	8	8	38	363	363	39.728	6.60986
G4NIH7	Sulfate transporter 4.1 OS=Magnaporthe oryzae (strain P131) GN=OOW_P131scaffold00754g4 PE=3 SV=1 - [L7J9D4_MAGOP]	11.13	1	7	7	23	800	800	87.0978	8.99756
G4MVI0	Choline monooxygenase OS=Magnaporthe oryzae (strain 70-15 / ATCC MYA-4617 / FGSC 8958) GN=MGG_12423 PE=4 SV=1 - [G4MVI0_MAGO7]	31.95	2	13	13	39	435	435	50.286	6.18896
G4MM51	Xylosidase/arabinosidase OS=Magnaporthe oryzae (strain 70-15 / ATCC MYA-4617 / FGSC 8958) GN=MGG_05479 PE=3 SV=1 - [G4MM51_MAGO7]	20.83	3	9	9	28	557	557	61.0749	4.97021
G4MPQ4	Glutathione S-transferase Gst3, variant OS=Magnaporthe oryzae (strain 70-15 / ATCC MYA-4617 / FGSC 8958) GN=MGG_02244 PE=4 SV=1 - [G4MPQ4_MAGO7]	27.07	3	8	8	20	351	351	39.5061	6.30322
G4MXL4	Endoplasmic reticulum-Golgi intermediate compartment protein 3 OS=Magnaporthe oryzae (strain 70-15 / ATCC MYA-4617 / FGSC 8958) GN=MGG_01245 PE=4 SV=1 - [G4MXL4_MAGO7]	24.83	2	8	8	31	439	439	48.6192	7.35693
G4MND5	D-3-phosphoglycerate dehydrogenase 2 OS=Magnaporthe oryzae (strain 70-15 / ATCC MYA-4617 / FGSC 8958) GN=MGG_11794 PE=3 SV=1 - [G4MND5_MAGO7]	24.36	2	10	10	28	472	472	51.4688	6.80029
G4NBF9	Fumarylacetoacetate hydrolase domain-containing protein 1 OS=Magnaporthe oryzae (strain P131) GN=OOW_P131scaffold01708g16 PE=4 SV=1 - [L7IPZ9_MAGOP]	36.52	2	7	7	31	230	230	25.2083	6.01123
G5EI76	Uncharacterized protein OS=Magnaporthe oryzae (strain 70-15 / ATCC MYA-4617 / FGSC 8958) GN=MGCH7_ch7g410 PE=4 SV=1 - [G5EI76_MAGO7]	23.94	1	4	4	29	142	142	14.3131	5.32568
G4NHC3	Actin-1 OS=Magnaporthe oryzae (strain P131) GN=OOW_P131scaffold01181g17 PE=3 SV=1 - [L7IZZ5_MAGOP]	33.33	1	11	11	53	438	438	47.6511	6.91748
G4N9J5	Kynurenine-oxoglutarate transaminase 1 OS=Magnaporthe oryzae (strain 70-15 / ATCC MYA-4617 / FGSC 8958) GN=MGG_03264 PE=4 SV=1 - [G4N9J5_MAGO7]	25.44	2	10	10	21	456	456	51.0891	6.7417
G4NJZ1	Methylcrotonoyl-CoA carboxylase subunit alpha, mitochondrial OS=Magnaporthe oryzae (strain P131) GN=OOW_P131scaffold01088g5 PE=4 SV=1 - [L7J418_MAGOP]	35.34	3	20	20	29	747	747	81.1226	6.32861
G4MYC7	Uncharacterized protein OS=Magnaporthe oryzae (strain 70-15 / ATCC MYA-4617 / FGSC 8958) GN=MGG_08113 PE=4 SV=1 - [G4MYC7_MAGO7]	21.74	1	3	3	16	184	184	19.183	7.79639
Q2KGQ0	Putative uncharacterized protein OS=Magnaporthe oryzae (strain 70-15 / ATCC MYA-4617 / FGSC 8958) GN=MGCH7_ch7g285 PE=4 SV=1 - [Q2KGQ0_MAGO7]	7.08	2	6	6	16	1087	1087	118.784	6.59521
G4N8H7	Translationally controlled tumor protein OS=Magnaporthe oryzae PE=2 SV=1 - [D4NXD4_MAGOR]	61.76	3	9	9	26	170	170	19.3224	4.76709
G4N1P6	Glutaminase GtaA OS=Magnaporthe oryzae (strain 70-15 / ATCC MYA-4617 / FGSC 8958) GN=MGG_07512 PE=4 SV=1 - [G4N1P6_MAGO7]	21.74	6	14	14	32	828	828	92.8007	5.23682
G4MTD7	Cell division control protein 3 OS=Magnaporthe oryzae (strain 70-15 / ATCC MYA-4617 / FGSC 8958) GN=MGG_01521 PE=3 SV=1 - [G4MTD7_MAGO7]	33.64	2	11	12	40	437	437	49.9968	7.12256
G4NAR6	Cofilin OS=Magnaporthe oryzae (strain P131) GN=OOW_P131scaffold01199g15 PE=3 SV=1 - [L7IZW9_MAGOP]	57.89	1	6	6	19	152	152	16.6194	5.64307
G4NF71	Beta-glucosidase 2 OS=Magnaporthe oryzae (strain 70-15 / ATCC MYA-4617 / FGSC 8958) GN=MGG_14903 PE=4 SV=1 - [G4NF71_MAGO7]	11.61	3	7	7	23	758	758	82.138	6.21436
G4N184	Cell division control protein 12 OS=Magnaporthe oryzae (strain P131) GN=OOW_P131scaffold00472g7 PE=3 SV=1 - [L7JCM1_MAGOP]	37.66	1	9	10	37	385	385	44.4661	8.63135
G4N0E3	Inositol-3-phosphate synthase OS=Magnaporthe oryzae (strain 70-15 / ATCC MYA-4617 / FGSC 8958) GN=MGG_13185 PE=4 SV=1 - [G4N0E3_MAGO7]	28.8	1	12	12	40	552	552	60.5167	6.60986
G5EHM4	Neutral protease 2 OS=Magnaporthe oryzae (strain 70-15 / ATCC MYA-4617 / FGSC 8958) GN=MGCH7_ch7g816 PE=3 SV=1 - [G5EHM4_MAGO7]	16.25	1	5	5	14	357	357	38.7463	5.61768
G4NLT9	Uncharacterized protein OS=Magnaporthe oryzae (strain 70-15 / ATCC MYA-4617 / FGSC 8958) GN=MGG_02851 PE=4 SV=1 - [G4NLT9_MAGO7]	17.78	4	5	5	31	433	433	45.2138	9.23193
Q2KH30	Putative uncharacterized protein OS=Magnaporthe oryzae (strain 70-15 / ATCC MYA-4617 / FGSC 8958) GN=MGCH7_ch7g155 PE=4 SV=1 - [Q2KH30_MAGO7]	29.81	2	5	5	24	161	161	17.3359	4.61475
G4N8E7	Uncharacterized protein OS=Magnaporthe oryzae (strain 70-15 / ATCC MYA-4617 / FGSC 8958) GN=MGG_06276 PE=4 SV=1 - [G4N8E7_MAGO7]	26.24	1	13	13	28	587	587	65.7724	9.01221
G4NB37	Potassium:hydrogen antiporter OS=Magnaporthe oryzae (strain 70-15 / ATCC MYA-4617 / FGSC 8958) GN=MGG_00633 PE=4 SV=1 - [G4NB37_MAGO7]	8.09	2	5	5	10	902	902	96.9139	6.7124
G4N372	Uncharacterized protein OS=Magnaporthe oryzae (strain 70-15 / ATCC MYA-4617 / FGSC 8958) GN=MGG_04941 PE=4 SV=1 - [G4N372_MAGO7]	36.36	2	5	5	17	187	187	21.2223	5.41455
G4N755	Ubiquitin-protein ligase Sel1/Ubx2 OS=Magnaporthe oryzae (strain 70-15 / ATCC MYA-4617 / FGSC 8958) GN=MGG_13508 PE=4 SV=1 - [G4N755_MAGO7]	19.5	3	13	13	25	841	841	92.1566	6.18896
G4N4W0	Uncharacterized protein OS=Magnaporthe oryzae (strain 70-15 / ATCC MYA-4617 / FGSC 8958) GN=MGG_06030 PE=4 SV=1 - [G4N4W0_MAGO7]	50.62	1	8	8	21	243	243	27.519	5.90967
G4MR70	ATP synthase subunit gamma OS=Magnaporthe oryzae (strain P131) GN=OOW_P131scaffold01201g9 PE=3 SV=1 - [L7IZS5_MAGOP]	25.5	1	5	5	19	302	302	32.7388	8.74854
G4MYY3	Obg-like ATPase 1 OS=Magnaporthe oryzae (strain 70-15 / ATCC MYA-4617 / FGSC 8958) GN=MGG_10957 PE=3 SV=1 - [G4MYY3_MAGO7]	24.11	1	8	8	23	394	394	43.7841	7.72314
G4N3S1	Uncharacterized protein (Fragment) OS=Magnaporthe oryzae (strain P131) GN=OOW_P131scaffold00299g8 PE=4 SV=1 - [L7JJL0_MAGOP]	15.13	2	2	2	14	271	271	27.0285	4.77979
G4MQK5	Cell wall glycosyl hydrolase YteR OS=Magnaporthe oryzae (strain 70-15 / ATCC MYA-4617 / FGSC 8958) GN=MGG_02340 PE=4 SV=1 - [G4MQK5_MAGO7]	18.52	4	5	6	27	405	405	45.5432	5.36377
G4MZT3	Uncharacterized protein OS=Magnaporthe oryzae (strain P131) GN=OOW_P131scaffold00449g9 PE=4 SV=1 - [L7JCG0_MAGOP]	12.63	1	13	13	30	1235	1235	131.46	5.26221
G4MU43	Uncharacterized protein OS=Magnaporthe oryzae (strain P131) GN=OOW_P131scaffold00954g17 PE=4 SV=1 - [L7J6D8_MAGOP]	24.12	2	7	7	18	340	340	37.7255	7.04932
G4NGL9	Glycosyl transferase OS=Magnaporthe oryzae (strain 70-15 / ATCC MYA-4617 / FGSC 8958) GN=MGG_04092 PE=4 SV=1 - [G4NGL9_MAGO7]	14.15	1	4	4	18	318	318	36.0599	5.30029
G4MZM5	Uncharacterized protein OS=Magnaporthe oryzae (strain 70-15 / ATCC MYA-4617 / FGSC 8958) GN=MGG_15837 PE=4 SV=1 - [G4MZM5_MAGO7]	34.95	2	9	9	24	329	329	36.3361	9.0415
G4N6Y1	Uncharacterized protein OS=Magnaporthe oryzae (strain 70-15 / ATCC MYA-4617 / FGSC 8958) GN=MGG_06496 PE=4 SV=1 - [G4N6Y1_MAGO7]	11.39	2	14	14	29	1256	1256	137.575	7.40088
G4MUT0	Putative uncharacterized protein OS=Magnaporthe oryzae PE=2 SV=1 - [D4NXC7_MAGOR]	42.42	1	10	10	38	231	231	24.9798	5.51611
G4MMM0	Uncharacterized protein OS=Magnaporthe oryzae (strain 70-15 / ATCC MYA-4617 / FGSC 8958) GN=MGG_15175 PE=4 SV=1 - [G4MMM0_MAGO7]	34.52	3	9	9	18	420	420	47.0359	5.88428
A4R6R9	60S ribosomal protein L13 OS=Magnaporthe oryzae (strain P131) GN=OOW_P131scaffold00943g19 PE=3 SV=1 - [L7J8B3_MAGOP]	34.65	1	7	7	52	202	202	23.0588	11.019
A4RFH6	Eukaryotic translation initiation factor 3 subunit D OS=Magnaporthe oryzae (strain 70-15 / ATCC MYA-4617 / FGSC 8958) GN=MGG_00341 PE=3 SV=1 - [EIF3D_MAGO7]	24.78	1	9	9	20	573	573	63.1693	5.33838
G4N762	D-lactate dehydrogenase 2 OS=Magnaporthe oryzae (strain 70-15 / ATCC MYA-4617 / FGSC 8958) GN=MGG_12830 PE=4 SV=1 - [G4N762_MAGO7]	26.29	2	12	12	43	544	544	59.7345	6.84424
G5EGZ5	Putative uncharacterized protein OS=Magnaporthe oryzae PE=2 SV=1 - [D4NXE2_MAGOR]	57.53	2	6	6	18	146	146	16.0208	10.4917
G4MYJ2	Uncharacterized protein OS=Magnaporthe oryzae (strain 70-15 / ATCC MYA-4617 / FGSC 8958) GN=MGG_10844 PE=4 SV=1 - [G4MYJ2_MAGO7]	16.86	1	3	3	13	172	172	19.5167	8.17725
G4MS85	Dolichyl-diphosphooligosaccharide-protein glycotransferase OS=Magnaporthe oryzae (strain 70-15 / ATCC MYA-4617 / FGSC 8958) GN=MGG_04500 PE=4 SV=1 - [G4MS85_MAGO7]	22.8	1	6	6	29	329	329	36.4631	9.62744
G4MS82	Carbamoyl-phosphate synthase arginine-specific large chain OS=Magnaporthe oryzae (strain P131) GN=OOW_P131scaffold01138g24 PE=4 SV=1 - [L7J109_MAGOP]	16.79	1	15	16	26	1179	1179	128.984	6.34131
A4QQN1	Mannitol 2-dehydrogenase OS=Magnaporthe oryzae (strain 70-15 / ATCC MYA-4617 / FGSC 8958) GN=MGCH7_ch7g1113 PE=3 SV=1 - [M2DH_MAGO7]	35.06	1	15	15	34	502	502	56.4623	6.22705
G4MRA6	Glucan 1,3-beta-glucosidase OS=Magnaporthe oryzae (strain 70-15 / ATCC MYA-4617 / FGSC 8958) GN=MGG_04689 PE=3 SV=1 - [G4MRA6_MAGO7]	26.45	1	8	8	26	397	397	42.2	5.85889
G4N7N7	60S ribosomal protein L36 OS=Magnaporthe oryzae (strain 70-15 / ATCC MYA-4617 / FGSC 8958) GN=MGG_03554 PE=3 SV=1 - [G4N7N7_MAGO7]	39.45	1	5	5	21	109	109	12.0809	11.7368
G4MKW3	Carboxylic ester hydrolase OS=Magnaporthe oryzae (strain P131) GN=OOW_P131scaffold00083g15 PE=3 SV=1 - [L7JPB4_MAGOP]	19.33	1	9	9	16	631	631	67.7735	6.78564
G4N2S0	Uncharacterized protein OS=Magnaporthe oryzae (strain 70-15 / ATCC MYA-4617 / FGSC 8958) GN=MGG_04896 PE=4 SV=1 - [G4N2S0_MAGO7]	76.47	2	8	8	24	153	153	16.2585	7.34229
G4MVK8	Fructose-1,6-bisphosphatase OS=Magnaporthe oryzae (strain 70-15 / ATCC MYA-4617 / FGSC 8958) GN=MGG_08895 PE=3 SV=1 - [G4MVK8_MAGO7]	36.34	1	10	10	35	344	344	37.6437	6.13818
G5EI19	Nipsnap family protein OS=Magnaporthe oryzae (strain 70-15 / ATCC MYA-4617 / FGSC 8958) GN=MGCH7_ch7g324 PE=4 SV=1 - [G5EI19_MAGO7]	23.53	1	9	9	36	374	374	42.0785	9.42236
G4N031	Mannan polymerase II complex ANP1 subunit OS=Magnaporthe oryzae (strain 70-15 / ATCC MYA-4617 / FGSC 8958) GN=MGG_06191 PE=4 SV=1 - [G4N031_MAGO7]	17.57	1	8	8	34	404	404	46.0555	7.00537
G4NIH2	Acetylxylan esterase 2 OS=Magnaporthe oryzae (strain 70-15 / ATCC MYA-4617 / FGSC 8958) GN=MGG_09840 PE=4 SV=1 - [G4NIH2_MAGO7]	26.09	1	7	7	26	299	299	30.5633	5.38916
G4MSB1	Bifunctional purine biosynthesis protein ADE17 OS=Magnaporthe oryzae (strain 70-15 / ATCC MYA-4617 / FGSC 8958) GN=MGG_04435 PE=3 SV=1 - [G4MSB1_MAGO7]	39.66	1	17	17	32	595	595	64.2963	6.56592
G4MUU2	Rho GDP dissociation inhibitor OS=Magnaporthe oryzae (strain 70-15 / ATCC MYA-4617 / FGSC 8958) GN=MGG_01689 PE=4 SV=1 - [G4MUU2_MAGO7]	41.71	3	7	7	29	199	199	22.6162	6.22705
G4MTY7	Epidermal retinal dehydrogenase 2 OS=Magnaporthe oryzae (strain 70-15 / ATCC MYA-4617 / FGSC 8958) GN=MGG_01604 PE=3 SV=1 - [G4MTY7_MAGO7]	29.14	1	9	9	28	374	374	41.2718	9.53955
G4NCR9	Methionyl-tRNA synthetase OS=Magnaporthe oryzae (strain 70-15 / ATCC MYA-4617 / FGSC 8958) GN=MGG_01046 PE=3 SV=1 - [G4NCR9_MAGO7]	28.43	1	16	16	34	700	700	77.6814	6.55127
G4MZM1	Endoplasmic reticulum vesicle protein 25 OS=Magnaporthe oryzae (strain 70-15 / ATCC MYA-4617 / FGSC 8958) GN=MGG_08210 PE=3 SV=1 - [G4MZM1_MAGO7]	35.62	2	7	7	34	219	219	24.8599	6.78564
G4N6A6	Quinone oxidoreductase OS=Magnaporthe oryzae (strain P131) GN=OOW_P131scaffold00539g25 PE=4 SV=1 - [L7JBT4_MAGOP]	28.01	2	7	7	27	332	332	35.4443	6.99072
G4NKB2	Dihydroxyacetone kinase OS=Magnaporthe oryzae (strain 70-15 / ATCC MYA-4617 / FGSC 8958) GN=MGG_03095 PE=4 SV=1 - [G4NKB2_MAGO7]	26.99	4	11	11	32	589	589	61.7092	5.51611
P0CT11	Glycerol-3-phosphate dehydrogenase [NAD(+)] OS=Magnaporthe oryzae (strain 70-15 / ATCC MYA-4617 / FGSC 8958) GN=MGG_00067 PE=3 SV=1 - [GPD_MAGO7]	14.09	1	5	5	15	433	433	46.7271	6.37939
G4NHA5	Protein arginine N-methyltransferase OS=Magnaporthe oryzae (strain P131) GN=OOW_P131scaffold00303g33 PE=3 SV=1 - [L7JIJ6_MAGOP]	28.09	2	18	18	33	776	776	87.6684	6.59521
G4MN06	Uncharacterized protein OS=Magnaporthe oryzae (strain P131) GN=OOW_P131scaffold00328g32 PE=3 SV=1 - [L7JGA4_MAGOP]	18.87	1	9	9	42	567	567	64.4635	6.69775
A4RHF1	ATP-dependent RNA helicase ded-1 OS=Magnaporthe oryzae (strain P131) GN=OOW_P131scaffold00323g38 PE=3 SV=1 - [L7JGU0_MAGOP]	14.59	2	7	8	19	665	665	69.9775	8.71924
G4NEU2	Maltose permease MAL61 OS=Magnaporthe oryzae (strain 70-15 / ATCC MYA-4617 / FGSC 8958) GN=MGG_00045 PE=3 SV=1 - [G4NEU2_MAGO7]	17.28	1	8	8	38	544	544	59.8016	6.771
G4NEY0	Glucose-repressible protein OS=Magnaporthe oryzae PE=2 SV=1 - [D4NXC8_MAGOR]	52.11	1	3	3	10	71	71	7.3646	6.78564
A4RDI6	Methionine aminopeptidase 2 OS=Magnaporthe oryzae (strain 70-15 / ATCC MYA-4617 / FGSC 8958) GN=MGG_00966 PE=3 SV=1 - [MAP2_MAGO7]	18.96	3	8	8	23	443	443	48.3585	6.34131
G5EGX5	Pyruvate dehydrogenase E1 component subunit beta OS=Magnaporthe oryzae (strain 70-15 / ATCC MYA-4617 / FGSC 8958) GN=MGCH7_ch7g117 PE=4 SV=1 - [G5EGX5_MAGO7]	30.03	1	9	9	25	383	383	41.6633	7.03467
G4MWF9	3-hydroxy-3-methylglutaryl coenzyme A reductase OS=Magnaporthe oryzae (strain P131) GN=OOW_P131scaffold00572g7 PE=3 SV=1 - [L7J906_MAGOP]	13.66	1	13	13	22	1201	1201	128.735	8.42627
G4NG93	Uncharacterized protein OS=Magnaporthe oryzae (strain 70-15 / ATCC MYA-4617 / FGSC 8958) GN=MGG_17618 PE=4 SV=1 - [G4NG93_MAGO7]	16.84	1	4	4	14	297	297	32.5288	6.55127
G4N005	Uncharacterized protein OS=Magnaporthe oryzae (strain 70-15 / ATCC MYA-4617 / FGSC 8958) GN=MGG_06169 PE=4 SV=1 - [G4N005_MAGO7]	20.79	2	7	7	24	404	404	43.8133	5.18604
G4NIQ1	Aspartate aminotransferase OS=Magnaporthe oryzae (strain 70-15 / ATCC MYA-4617 / FGSC 8958) GN=MGG_04156 PE=4 SV=1 - [G4NIQ1_MAGO7]	31.73	1	11	11	27	457	457	50.1302	8.44092
G4MMH2	Alpha-L-arabinofuranosidase B OS=Magnaporthe oryzae (strain 70-15 / ATCC MYA-4617 / FGSC 8958) GN=abfB PE=1 SV=1 - [ABFB_MAGO7]	25.51	1	9	9	19	486	486	52.4222	6.354
G4MY89	Tropomyosin TPM1-like protein OS=Magnaporthe oryzae PE=2 SV=1 - [D4NXH6_MAGOR]	44.72	1	7	7	20	161	161	18.6155	4.86865
G4N555	Eukaryotic translation initiation factor 5B OS=Magnaporthe oryzae (strain 70-15 / ATCC MYA-4617 / FGSC 8958) GN=MGG_06066 PE=4 SV=1 - [G4N555_MAGO7]	13.56	2	11	11	23	1062	1062	116.361	5.65576
G4N8X6	Carboxylic acid transporter OS=Magnaporthe oryzae (strain 70-15 / ATCC MYA-4617 / FGSC 8958) GN=MGG_03360 PE=4 SV=1 - [G4N8X6_MAGO7]	26.51	1	13	13	35	513	513	55.6384	7.88428
G4MWP3	Uncharacterized protein OS=Magnaporthe oryzae (strain P131) GN=OOW_P131scaffold00509g8 PE=4 SV=1 - [L7JCL1_MAGOP]	20.08	2	4	4	11	264	264	28.9759	5.40186
G4N350	Alpha-N-arabinofuranosidase 2 OS=Magnaporthe oryzae (strain P131) GN=OOW_P131scaffold00314g67 PE=3 SV=1 - [L7JI26_MAGOP]	18.33	1	5	5	14	360	360	39.9633	6.26514
G4N1R8	Glutamate-5-semialdehyde dehydrogenase OS=Magnaporthe oryzae (strain 70-15 / ATCC MYA-4617 / FGSC 8958) GN=MGG_12996 PE=3 SV=1 - [G4N1R8_MAGO7]	30.79	1	11	11	27	445	445	46.532	5.51611
G4NCH8	Ras-like protein Rab-11A OS=Magnaporthe oryzae (strain 70-15 / ATCC MYA-4617 / FGSC 8958) GN=MGG_01079 PE=4 SV=1 - [G4NCH8_MAGO7]	45.02	1	8	8	35	211	211	23.3528	5.90967
A4RD09	Pentafunctional AROM polypeptide OS=Magnaporthe oryzae (strain 70-15 / ATCC MYA-4617 / FGSC 8958) GN=MGG_01128 PE=3 SV=2 - [ARO1_MAGO7]	9.56	1	15	15	34	1590	1590	171.246	6.78564
G4MKN5	Class II Aldolase OS=Magnaporthe oryzae (strain 70-15 / ATCC MYA-4617 / FGSC 8958) GN=MGG_06636 PE=4 SV=1 - [G4MKN5_MAGO7]	31.46	1	7	7	24	321	321	34.2641	5.8335
G4NDS8	Uncharacterized protein OS=Magnaporthe oryzae (strain 70-15 / ATCC MYA-4617 / FGSC 8958) GN=MGG_00872 PE=4 SV=1 - [G4NDS8_MAGO7]	50.36	2	7	7	38	137	137	15.424	7.57666
P0CT10	Sterol 24-C-methyltransferase OS=Magnaporthe oryzae (strain Y34) GN=ERG6 PE=2 SV=1 - [ERG6_MAGOY]	42.56	3	12	12	22	390	390	43.0085	6.91748
G4MR39	Uncharacterized protein OS=Magnaporthe oryzae (strain P131) GN=OOW_P131scaffold01201g39 PE=4 SV=1 - [L7IZU8_MAGOP]	65	1	6	6	19	120	120	13.5318	4.99561
G4N2G2	40S ribosomal protein S26 OS=Magnaporthe oryzae PE=2 SV=1 - [D4NXE5_MAGOR]	32.77	1	4	4	19	119	119	13.5633	10.9165
G4NBP8	Pyridoxal kinase OS=Magnaporthe oryzae (strain 70-15 / ATCC MYA-4617 / FGSC 8958) GN=MGG_00517 PE=4 SV=1 - [G4NBP8_MAGO7]	21.01	2	5	5	10	357	357	38.9329	6.32861
G4NAV1	60S ribosomal protein L10 OS=Magnaporthe oryzae (strain 70-15 / ATCC MYA-4617 / FGSC 8958) GN=MGG_03136 PE=4 SV=1 - [G4NAV1_MAGO7]	21.46	1	6	6	30	219	219	25.0042	10.3892
G4MNT9	GTP-binding protein ypt1 OS=Magnaporthe oryzae (strain 70-15 / ATCC MYA-4617 / FGSC 8958) GN=MGG_06962 PE=4 SV=1 - [G4MNT9_MAGO7]	46.53	2	7	9	38	202	202	22.4481	5.43994
G4NJ55	Putative uncharacterized protein OS=Magnaporthe oryzae PE=2 SV=1 - [D4NXF3_MAGOR]	48.57	2	3	3	23	70	70	7.75213	8.00146
G4MNN2	Uncharacterized protein OS=Magnaporthe oryzae (strain 70-15 / ATCC MYA-4617 / FGSC 8958) GN=MGG_05657 PE=4 SV=1 - [G4MNN2_MAGO7]	11.49	1	1	1	13	87	87	9.33592	7.91357
G4N4L9	Uncharacterized protein OS=Magnaporthe oryzae (strain 70-15 / ATCC MYA-4617 / FGSC 8958) GN=MGG_05995 PE=4 SV=1 - [G4N4L9_MAGO7]	30.04	1	6	6	24	243	243	27.1414	6.15088
G4MN52	Uncharacterized protein OS=Magnaporthe oryzae (strain 70-15 / ATCC MYA-4617 / FGSC 8958) GN=MGG_05597 PE=4 SV=1 - [G4MN52_MAGO7]	35.17	1	6	6	25	236	236	26.4561	5.84619
G4NCG1	Homocitrate synthase OS=Magnaporthe oryzae (strain 70-15 / ATCC MYA-4617 / FGSC 8958) GN=MGG_01092 PE=3 SV=1 - [G4NCG1_MAGO7]	18.14	2	6	6	15	485	485	52.6724	6.01123
G4MR06	Glutamate decarboxylase OS=Magnaporthe oryzae (strain 70-15 / ATCC MYA-4617 / FGSC 8958) GN=MGG_02378 PE=3 SV=1 - [G4MR06_MAGO7]	28.24	2	14	14	23	517	517	58.0682	6.20166
G4N1D2	Dipeptidase OS=Magnaporthe oryzae (strain 70-15 / ATCC MYA-4617 / FGSC 8958) GN=MGG_09530 PE=3 SV=1 - [G4N1D2_MAGO7]	24.95	1	10	10	27	461	461	50.9168	6.21436
G4MS02	Calcium-transporting ATPase OS=Magnaporthe oryzae (strain 70-15 / ATCC MYA-4617 / FGSC 8958) GN=MGG_02487 PE=3 SV=1 - [G4MS02_MAGO7]	6.08	1	7	7	17	1447	1447	157.28	7.85498
G4NI11	FAD binding domain-containing protein OS=Magnaporthe oryzae (strain 70-15 / ATCC MYA-4617 / FGSC 8958) GN=MGG_09376 PE=4 SV=1 - [G4NI11_MAGO7]	22.33	3	9	9	31	506	506	54.2112	5.2749
G4MNZ6	Uridine nucleosidase OS=Magnaporthe oryzae (strain P131) GN=OOW_P131scaffold01194g1 PE=4 SV=1 - [L7IZC3_MAGOP]	32.81	1	8	8	19	384	384	40.7629	5.41455
G4MTP4	Uncharacterized protein OS=Magnaporthe oryzae (strain 70-15 / ATCC MYA-4617 / FGSC 8958) GN=MGG_15565 PE=4 SV=1 - [G4MTP4_MAGO7]	24.75	1	9	9	34	408	408	47.3929	5.47803
G4MVK9	Peroxisomal biogenesis factor OS=Magnaporthe oryzae (strain 70-15 / ATCC MYA-4617 / FGSC 8958) GN=MGG_08896 PE=4 SV=1 - [G4MVK9_MAGO7]	29.49	1	8	8	39	234	234	25.8578	9.99365
G4N940	Hypoxanthine guanine phosphoribosyltransferase OS=Magnaporthe oryzae (strain P131) GN=OOW_P131scaffold01546g8 PE=4 SV=1 - [L7IS09_MAGOP]	40	1	7	7	19	205	205	23.1209	5.66846
G4MQN1	Uncharacterized protein OS=Magnaporthe oryzae (strain 70-15 / ATCC MYA-4617 / FGSC 8958) GN=MGG_09285 PE=3 SV=1 - [G4MQN1_MAGO7]	23.36	1	9	9	30	488	488	54.7207	6.53662
G4N022	Uncharacterized protein OS=Magnaporthe oryzae (strain 70-15 / ATCC MYA-4617 / FGSC 8958) GN=MGG_06183 PE=4 SV=1 - [G4N022_MAGO7]	36.84	3	8	8	30	285	285	30.4698	8.22119
G4MRV9	Uncharacterized protein OS=Magnaporthe oryzae (strain 70-15 / ATCC MYA-4617 / FGSC 8958) GN=MGG_02450 PE=4 SV=1 - [G4MRV9_MAGO7]	22.29	3	9	9	26	471	471	53.0508	6.96143
G4NGA7	Carboxylic ester hydrolase OS=Magnaporthe oryzae (strain 70-15 / ATCC MYA-4617 / FGSC 8958) GN=MGG_10414 PE=3 SV=1 - [G4NGA7_MAGO7]	14.93	1	7	7	18	536	536	57.536	5.32568
G4MPS3	Nitroreductase OS=Magnaporthe oryzae (strain 70-15 / ATCC MYA-4617 / FGSC 8958) GN=MGG_09212 PE=4 SV=1 - [G4MPS3_MAGO7]	40.07	2	10	10	29	292	292	32.9051	9.27588
G4MYQ8	Uncharacterized protein OS=Magnaporthe oryzae (strain 70-15 / ATCC MYA-4617 / FGSC 8958) GN=MGG_08132 PE=4 SV=1 - [G4MYQ8_MAGO7]	10.87	1	1	1	15	138	138	16.1575	6.354
G4NA68	Minor extracellular protease vpr OS=Magnaporthe oryzae (strain 70-15 / ATCC MYA-4617 / FGSC 8958) GN=MGG_08436 PE=3 SV=1 - [G4NA68_MAGO7]	6.96	2	4	4	14	919	919	97.0123	5.33838
G4NDD4	Ethanolamine-phosphate cytidylyltransferase OS=Magnaporthe oryzae (strain 70-15 / ATCC MYA-4617 / FGSC 8958) GN=MGG_00943 PE=4 SV=1 - [G4NDD4_MAGO7]	14.77	2	5	5	17	447	447	50.0908	5.73193
G4NGV9	Dihydroxyacetone kinase OS=Magnaporthe oryzae (strain 70-15 / ATCC MYA-4617 / FGSC 8958) GN=MGG_04014 PE=4 SV=1 - [G4NGV9_MAGO7]	26.64	1	10	10	22	593	593	61.3035	5.56689
G4NHA4	Small nuclear ribonucleoprotein F OS=Magnaporthe oryzae (strain P131) GN=OOW_P131scaffold00303g32 PE=3 SV=1 - [L7JHW8_MAGOP]	32.95	1	3	3	12	88	88	10.1891	4.93213
G4N7X3	Integral membrane protein OS=Magnaporthe oryzae (strain P131) GN=OOW_P131scaffold01365g13 PE=4 SV=1 - [L7ITR5_MAGOP]	6.46	2	3	3	17	418	418	45.7196	5.8208
G4N5C1	Uncharacterized protein OS=Magnaporthe oryzae (strain 70-15 / ATCC MYA-4617 / FGSC 8958) GN=MGG_05232 PE=4 SV=1 - [G4N5C1_MAGO7]	17.21	1	3	3	22	244	244	25.4481	6.84424
G4NG69	Chitin deacetylase OS=Magnaporthe oryzae (strain P131) GN=OOW_P131scaffold00051g9 PE=4 SV=1 - [L7JPX6_MAGOP]	17.81	1	4	4	23	393	393	41.3634	6.39209
G4MWW3	XPG N-terminal domain-containing protein OS=Magnaporthe oryzae (strain P131) GN=OOW_P131scaffold00324g9 PE=4 SV=1 - [L7JHD2_MAGOP]	17.3	1	11	11	20	734	734	81.932	6.01123
G4NDA1	Membrane-associated progesterone receptor component 1 OS=Magnaporthe oryzae (strain 70-15 / ATCC MYA-4617 / FGSC 8958) GN=MGG_00274 PE=3 SV=1 - [G4NDA1_MAGO7]	47.43	2	8	8	20	175	175	19.437	5.24951
A4QXV8	Adenylosuccinate synthetase OS=Magnaporthe oryzae (strain 70-15 / ATCC MYA-4617 / FGSC 8958) GN=MGG_17000 PE=3 SV=2 - [PURA_MAGO7]	24.35	1	9	10	21	423	423	46.9832	5.96045
G4MX02	Uncharacterized protein OS=Magnaporthe oryzae (strain 70-15 / ATCC MYA-4617 / FGSC 8958) GN=MGG_01208 PE=4 SV=1 - [G4MX02_MAGO7]	21.7	1	4	4	21	212	212	24.546	9.39307
A4RDD7	Eukaryotic translation initiation factor 3 subunit I OS=Magnaporthe oryzae (strain 70-15 / ATCC MYA-4617 / FGSC 8958) GN=TIF34 PE=3 SV=1 - [EIF3I_MAGO7]	21.41	2	7	7	19	341	341	38.1681	6.48096
G4N751	Uncharacterized protein OS=Magnaporthe oryzae (strain 70-15 / ATCC MYA-4617 / FGSC 8958) GN=MGG_17062 PE=4 SV=1 - [G4N751_MAGO7]	33.18	2	6	6	30	217	217	23.5342	6.80029
G4N9G1	N-(5-amino-5-carboxypentanoyl)-L-cysteinyl-D-valine synthase OS=Magnaporthe oryzae (strain P131) GN=OOW_P131scaffold00317g15 PE=4 SV=1 - [L7JGQ9_MAGOP]	12.03	1	11	11	20	1280	1280	138.235	6.03662
G4NEH2	Bud site selection protein 7 OS=Magnaporthe oryzae (strain 70-15 / ATCC MYA-4617 / FGSC 8958) GN=MGG_00106 PE=4 SV=1 - [G4NEH2_MAGO7]	21.29	1	13	13	26	695	695	78.0153	5.5415
G4NHN8	Hydroxyquinol 1,2-dioxygenase OS=Magnaporthe oryzae (strain 70-15 / ATCC MYA-4617 / FGSC 8958) GN=MGG_03773 PE=4 SV=1 - [G4NHN8_MAGO7]	25.59	1	8	8	40	297	297	32.9604	5.09717
G4MKZ3	Amine oxidase OS=Magnaporthe oryzae (strain P131) GN=OOW_P131scaffold01641g2 PE=3 SV=1 - [L7ISR9_MAGOP]	23.08	1	8	8	23	494	494	52.051	6.21436
G4N8F0	Uncharacterized protein OS=Magnaporthe oryzae (strain P131) GN=OOW_P131scaffold01189g4 PE=4 SV=1 - [L7J0K9_MAGOP]	24.74	1	3	3	16	190	190	22.2045	8.93896
G4MU94	Phosphoribosylformylglycinamidine cyclo-ligase OS=Magnaporthe oryzae (strain 70-15 / ATCC MYA-4617 / FGSC 8958) GN=MGG_11343 PE=3 SV=1 - [G4MU94_MAGO7]	20.63	1	12	12	30	795	795	83.6776	5.2876
G4MUX6	Glycogen [starch] synthase OS=Magnaporthe oryzae (strain 70-15 / ATCC MYA-4617 / FGSC 8958) GN=MGG_07289 PE=3 SV=1 - [G4MUX6_MAGO7]	26.84	1	16	16	37	708	708	80.2124	6.62451
G4NGR2	CLPTM1 domain-containing protein OS=Magnaporthe oryzae (strain P131) GN=OOW_P131scaffold01683g31 PE=4 SV=1 - [L7IQI0_MAGOP]	15.67	1	9	9	20	670	670	74.6014	6.78564
G4MY06	Lipase 2 OS=Magnaporthe oryzae (strain 70-15 / ATCC MYA-4617 / FGSC 8958) GN=MGG_10441 PE=4 SV=1 - [G4MY06_MAGO7]	42.43	3	9	9	26	337	337	36.2883	5.92236
G4NDN3	Sec14 cytosolic factor OS=Magnaporthe oryzae (strain 70-15 / ATCC MYA-4617 / FGSC 8958) GN=MGG_00905 PE=4 SV=1 - [G4NDN3_MAGO7]	32.65	1	8	8	29	343	343	37.7701	7.37158
G4MT27	Uncharacterized protein OS=Magnaporthe oryzae (strain 70-15 / ATCC MYA-4617 / FGSC 8958) GN=MGG_01519 PE=4 SV=1 - [G4MT27_MAGO7]	21.78	1	7	7	25	427	427	46.6502	7.47412
G4N9I9	Uncharacterized protein OS=Magnaporthe oryzae (strain P131) GN=OOW_P131scaffold01311g47 PE=4 SV=1 - [L7IVY3_MAGOP]	24.26	2	7	7	34	305	305	32.5185	6.37939
G4NFM4	Major myo-inositol transporter iolT OS=Magnaporthe oryzae (strain 70-15 / ATCC MYA-4617 / FGSC 8958) GN=MGG_08776 PE=3 SV=1 - [G4NFM4_MAGO7]	21.01	2	10	10	23	652	652	73.0013	7.21045
G4N6D8	Glutaryl-CoA dehydrogenase OS=Magnaporthe oryzae (strain 70-15 / ATCC MYA-4617 / FGSC 8958) GN=MGG_06561 PE=3 SV=1 - [G4N6D8_MAGO7]	13.15	2	5	6	14	426	426	46.0665	8.25049
A4RE47	Carboxypeptidase KEX1 OS=Magnaporthe oryzae (strain P131) GN=OOW_P131scaffold01307g22 PE=3 SV=1 - [L7IW63_MAGOP]	17.94	2	9	9	24	630	630	70.0917	6.16357
G4MZP7	Phosphatidylserine decarboxylase proenzyme 2 OS=Magnaporthe oryzae (strain 70-15 / ATCC MYA-4617 / FGSC 8958) GN=PSD2 PE=3 SV=1 - [G4MZP7_MAGO7]	7.86	2	8	9	26	1171	1171	129.553	6.44287
G4NDD5	Branched-chain-amino-acid aminotransferase OS=Magnaporthe oryzae (strain P131) GN=OOW_P131scaffold01094g8 PE=3 SV=1 - [L7J255_MAGOP]	29.12	1	10	10	28	419	419	45.8481	6.62451
G4MZ76	Glycolipid 2-alpha-mannosyltransferase OS=Magnaporthe oryzae (strain 70-15 / ATCC MYA-4617 / FGSC 8958) GN=MGG_08182 PE=4 SV=1 - [G4MZ76_MAGO7]	22.25	1	7	7	22	391	391	46.5185	6.80029
G4MWY3	Uncharacterized protein OS=Magnaporthe oryzae (strain 70-15 / ATCC MYA-4617 / FGSC 8958) GN=MGG_15637 PE=4 SV=1 - [G4MWY3_MAGO7]	40.35	1	6	6	19	171	171	18.1454	7.63525
G4MPY0	Dolichyl-diphosphooligosaccharide--protein glycosyltransferase subunit OST2 OS=Magnaporthe oryzae (strain P131) GN=OOW_P131scaffold01338g15 PE=3 SV=1 - [L7IUF2_MAGOP]	47.97	2	4	4	15	123	123	13.0878	9.56885
G4MS71	Uncharacterized protein OS=Magnaporthe oryzae (strain 70-15 / ATCC MYA-4617 / FGSC 8958) GN=MGG_16520 PE=4 SV=1 - [G4MS71_MAGO7]	18.73	1	9	9	34	518	518	57.0874	6.72705
G4NIS1	Mitochondrial F1F0 ATP synthase subunit F OS=Magnaporthe oryzae (strain 70-15 / ATCC MYA-4617 / FGSC 8958) GN=MGG_04135 PE=4 SV=1 - [G4NIS1_MAGO7]	28.71	2	3	3	15	101	101	11.171	10.8872
G4NFN1	Uncharacterized protein OS=Magnaporthe oryzae (strain 70-15 / ATCC MYA-4617 / FGSC 8958) GN=MGG_08771 PE=4 SV=1 - [G4NFN1_MAGO7]	24.9	1	5	5	14	257	257	28.8127	4.97021
G4N9R4	Uncharacterized protein OS=Magnaporthe oryzae (strain 70-15 / ATCC MYA-4617 / FGSC 8958) GN=MGG_17003 PE=3 SV=1 - [G4N9R4_MAGO7]	19.11	2	6	6	24	518	518	54.3883	7.37158
G4NKL3	Uncharacterized protein OS=Magnaporthe oryzae (strain 70-15 / ATCC MYA-4617 / FGSC 8958) GN=MGG_03050 PE=4 SV=1 - [G4NKL3_MAGO7]	37.87	2	11	11	21	367	367	39.5682	8.03076
G5EHG6	Para-nitrobenzyl esterase OS=Magnaporthe oryzae (strain 70-15 / ATCC MYA-4617 / FGSC 8958) GN=MGCH7_ch7g766 PE=4 SV=1 - [G5EHG6_MAGO7]	20.75	1	9	9	32	535	535	56.7926	5.03369
G4N7Y6	26S proteasome non-ATPase regulatory subunit 8 OS=Magnaporthe oryzae (strain P131) GN=OOW_P131scaffold01276g6 PE=4 SV=1 - [L7IXD5_MAGOP]	18.9	1	5	5	15	291	291	31.8765	6.13818
G4MRI3	Mitochondrial iron uptake protein OS=Magnaporthe oryzae (strain 70-15 / ATCC MYA-4617 / FGSC 8958) GN=MGG_02435 PE=4 SV=1 - [G4MRI3_MAGO7]	34.65	1	4	4	16	202	202	21.8923	4.91943
G4MZC6	Uncharacterized protein OS=Magnaporthe oryzae (strain P131) GN=OOW_P131scaffold01075g38 PE=4 SV=1 - [L7J2P1_MAGOP]	12.94	1	3	3	9	309	309	34.1593	10.2866
G4N9S2	40S ribosomal protein S24 OS=Magnaporthe oryzae PE=2 SV=1 - [D4NXD7_MAGOR]	42.22	1	5	5	36	135	135	15.4476	10.9604
G4NDT3	Phosphoinositide phospholipase C OS=Magnaporthe oryzae (strain P131) GN=OOW_P131scaffold00414g4 PE=4 SV=1 - [L7JFB6_MAGOP]	3.82	1	3	3	14	602	602	67.321	5.78271
G4NIL4	Uncharacterized protein OS=Magnaporthe oryzae (strain 70-15 / ATCC MYA-4617 / FGSC 8958) GN=MGG_14157 PE=4 SV=1 - [G4NIL4_MAGO7]	20.97	2	8	8	19	453	453	47.8966	8.39697
G4MTF1	Pyridoxamine 5'-phosphate oxidase OS=Magnaporthe oryzae (strain P131) GN=OOW_P131scaffold00469g11 PE=4 SV=1 - [L7JDL1_MAGOP]	25.98	2	4	4	9	254	254	28.4691	6.17627
G4N068	Low-affinity cAMP phosphodiesterase OS=Magnaporthe oryzae GN=PdeL PE=4 SV=1 - [D0ERY8_MAGOR]	16.24	1	7	7	30	585	585	62.0681	6.11279
A4R962	Clustered mitochondria protein homolog OS=Magnaporthe oryzae (strain 70-15 / ATCC MYA-4617 / FGSC 8958) GN=CLU1 PE=3 SV=1 - [CLU_MAGO7]	9.46	2	9	9	17	1311	1311	145.083	5.43994
G4NE87	Siderophore iron transporter mirC OS=Magnaporthe oryzae (strain 70-15 / ATCC MYA-4617 / FGSC 8958) GN=MGG_00133 PE=4 SV=1 - [G4NE87_MAGO7]	8.01	2	5	5	19	649	649	70.3874	8.11865
G4MVW7	Serin endopeptidase OS=Magnaporthe oryzae (strain 70-15 / ATCC MYA-4617 / FGSC 8958) GN=MGG_08415 PE=4 SV=1 - [G4MVW7_MAGO7]	7.54	3	6	6	14	902	902	93.5013	6.03662
G4N6J4	Carboxylic ester hydrolase OS=Magnaporthe oryzae (strain 70-15 / ATCC MYA-4617 / FGSC 8958) GN=MGG_12798 PE=3 SV=1 - [G4N6J4_MAGO7]	26.8	1	12	12	27	556	556	61.2963	6.18896
G4N0E9	High-affinity glucose transporter RGT2 OS=Magnaporthe oryzae (strain 70-15 / ATCC MYA-4617 / FGSC 8958) GN=MGG_06203 PE=3 SV=1 - [G4N0E9_MAGO7]	17.01	1	6	6	18	535	535	58.3472	8.01611
G4N5U8	Delta(14)-sterol reductase OS=Magnaporthe oryzae (strain 70-15 / ATCC MYA-4617 / FGSC 8958) GN=MGG_13986 PE=4 SV=1 - [G4N5U8_MAGO7]	19.38	2	10	10	48	480	480	54.0347	8.79248
G4NC51	Dihydroxy-acid dehydratase OS=Magnaporthe oryzae (strain 70-15 / ATCC MYA-4617 / FGSC 8958) GN=MGG_01139 PE=4 SV=1 - [G4NC51_MAGO7]	25.98	2	12	12	34	612	612	65.2586	6.30322
G4MQV9	Bacilysin biosynthesis oxidoreductase bacC OS=Magnaporthe oryzae (strain P131) GN=OOW_P131scaffold01494g1 PE=3 SV=1 - [L7ISE3_MAGOP]	21.53	1	6	6	20	274	274	28.3164	6.11279
G4MW57	Amidohydrolase OS=Magnaporthe oryzae (strain 70-15 / ATCC MYA-4617 / FGSC 8958) GN=MGG_01812 PE=4 SV=1 - [G4MW57_MAGO7]	8.9	2	4	4	13	607	607	66.0418	5.40186
G4NI01	NIMA-interacting protein TinC, variant OS=Magnaporthe oryzae (strain 70-15 / ATCC MYA-4617 / FGSC 8958) GN=MGG_09383 PE=4 SV=1 - [G4NI01_MAGO7]	12.87	3	8	11	33	901	901	99.1903	6.30322
G4MUT9	Uncharacterized protein OS=Magnaporthe oryzae (strain 70-15 / ATCC MYA-4617 / FGSC 8958) GN=MGG_11167 PE=4 SV=1 - [G4MUT9_MAGO7]	26.09	3	4	4	16	161	161	17.7696	4.55127
G4NAW2	2,4-dichlorophenol 6-monooxygenase OS=Magnaporthe oryzae (strain 70-15 / ATCC MYA-4617 / FGSC 8958) GN=MGG_03126 PE=4 SV=1 - [G4NAW2_MAGO7]	17.92	1	9	9	15	614	614	68.2693	6.69775
G4MTC3	Peroxisomal NADH pyrophosphatase NUDT12 OS=Magnaporthe oryzae (strain 70-15 / ATCC MYA-4617 / FGSC 8958) GN=MGG_04697 PE=4 SV=1 - [G4MTC3_MAGO7]	33.86	1	1	9	19	381	381	41.731	5.26221
G4N3M0	Uncharacterized protein OS=Magnaporthe oryzae (strain 70-15 / ATCC MYA-4617 / FGSC 8958) GN=MGG_05824 PE=4 SV=1 - [G4N3M0_MAGO7]	25.69	2	10	10	17	432	432	46.7409	4.99561
G5EHX9	Hydroxyquinol 1,2-dioxygenase OS=Magnaporthe oryzae (strain 70-15 / ATCC MYA-4617 / FGSC 8958) GN=MGCH7_ch7g341 PE=4 SV=1 - [G5EHX9_MAGO7]	43.2	1	11	11	32	338	338	37.4618	5.26221
G4NB13	Adenine phosphoribosyltransferase OS=Magnaporthe oryzae (strain 70-15 / ATCC MYA-4617 / FGSC 8958) GN=MGG_17399 PE=3 SV=1 - [G4NB13_MAGO7]	41.67	2	6	6	21	216	216	22.9472	6.04932
G4NCH1	ThiJ/PfpI family protein OS=Magnaporthe oryzae (strain P131) GN=OOW_P131scaffold01325g15 PE=4 SV=1 - [L7IVF5_MAGOP]	27.42	2	4	4	24	248	248	26.5227	5.22412
G4MXB8	Putidaredoxin reductase OS=Magnaporthe oryzae (strain P131) GN=OOW_P131scaffold01570g14 PE=4 SV=1 - [L7ISP4_MAGOP]	24.82	2	12	12	31	548	548	57.9421	6.68311
G4N778	Heat shock protein HSP98 OS=Magnaporthe oryzae (strain P131) GN=OOW_P131scaffold01381g45 PE=3 SV=1 - [L7IV38_MAGOP]	14.25	3	11	11	26	926	926	102.797	5.96045
G4MWU7	Uncharacterized protein OS=Magnaporthe oryzae (strain P131) GN=OOW_P131scaffold00274g14 PE=4 SV=1 - [L7JIR5_MAGOP]	23.06	1	8	8	18	438	438	48.7364	5.96045
G5EH53	Ribosomal protein S27 OS=Magnaporthe oryzae PE=2 SV=1 - [D4NXB9_MAGOR]	46.34	1	4	4	29	82	82	8.84758	9.21729
G4MY47	CORD and CS domain-containing protein (Fragment) OS=Magnaporthe oryzae (strain P131) GN=OOW_P131scaffold01061g5 PE=4 SV=1 - [L7J434_MAGOP]	34.12	2	7	7	20	255	255	27.292	8.22119
G4NCY2	26S protease subunit rpt4 OS=Magnaporthe oryzae (strain 70-15 / ATCC MYA-4617 / FGSC 8958) GN=MGG_00330 PE=3 SV=1 - [G4NCY2_MAGO7]	22.51	1	7	8	20	391	391	43.8982	6.18896
G4N5M5	Translation initiation factor 4B OS=Magnaporthe oryzae (strain P131) GN=OOW_P131scaffold01006g6 PE=4 SV=1 - [L7J6K2_MAGOP]	2.84	1	1	1	5	563	563	61.2243	8.60205
G4MSK8	Oxidoreductase 2-nitropropane dioxygenase family protein OS=Magnaporthe oryzae (strain 70-15 / ATCC MYA-4617 / FGSC 8958) GN=MGG_01473 PE=4 SV=1 - [G4MSK8_MAGO7]	26.1	2	9	10	33	387	387	41.0023	6.66846
G4NIS0	Uncharacterized protein OS=Magnaporthe oryzae (strain 70-15 / ATCC MYA-4617 / FGSC 8958) GN=MGG_04136 PE=4 SV=1 - [G4NIS0_MAGO7]	44.44	1	6	6	19	207	207	23.1848	9.83252
G4MND3	Uncharacterized protein OS=Magnaporthe oryzae (strain 70-15 / ATCC MYA-4617 / FGSC 8958) GN=MGG_16213 PE=3 SV=1 - [G4MND3_MAGO7]	9.18	2	13	13	29	1590	1590	180.011	6.96143
G4N2Y4	Homoserine acetyltransferase OS=Magnaporthe oryzae (strain 70-15 / ATCC MYA-4617 / FGSC 8958) GN=MGG_07627 PE=4 SV=1 - [G4N2Y4_MAGO7]	24.37	1	9	9	29	357	357	38.8801	6.45557
G4NAH9	Aldo-keto reductase yakc OS=Magnaporthe oryzae (strain P131) GN=OOW_P131scaffold01291g29 PE=4 SV=1 - [L7IYR1_MAGOP]	34.02	1	11	11	36	341	341	37.9833	5.43994
G4N7G1	RNP domain-containing protein OS=Magnaporthe oryzae (strain 70-15 / ATCC MYA-4617 / FGSC 8958) GN=MGG_13526 PE=4 SV=1 - [G4N7G1_MAGO7]	13.55	2	4	4	14	428	428	45.3117	6.90283
G4MTS8	Uncharacterized protein OS=Magnaporthe oryzae (strain P131) GN=OOW_P131scaffold00538g21 PE=4 SV=1 - [L7JA71_MAGOP]	33.7	1	2	2	9	92	92	10.2692	9.43701
G4MUA7	Uncharacterized protein OS=Magnaporthe oryzae (strain P131) GN=OOW_P131scaffold00411g2 PE=4 SV=1 - [L7JDT3_MAGOP]	16.85	1	2	2	6	184	184	20.2078	9.5542
G4MP09	Protein phosphatase PP2A regulatory subunit A OS=Magnaporthe oryzae (strain P131) GN=OOW_P131scaffold01194g16 PE=4 SV=1 - [L7IZD8_MAGOP]	21.83	1	12	12	30	623	623	69.1161	5.021
G4MXK8	Actl6a protein OS=Magnaporthe oryzae (strain P131) GN=OOW_P131scaffold00420g19 PE=3 SV=1 - [L7JF41_MAGOP]	15.52	1	7	7	16	509	509	55.6506	5.2749
A0A151V4S6	Uncharacterized protein OS=Magnaporthe oryzae (strain 70-15 / ATCC MYA-4617 / FGSC 8958) GN=MGG_14976 PE=4 SV=1 - [A0A151V4S6_MAGO7]	25.54	1	11	11	23	552	552	60.829	7.76709
G4N2C2	Glycine cleavage system H protein OS=Magnaporthe oryzae (strain P131) GN=OOW_P131scaffold01118g9 PE=3 SV=1 - [L7J2N5_MAGOP]	29.21	1	4	4	9	178	178	18.7856	5.14795
G4N008	Translocation protein SEC62 OS=Magnaporthe oryzae (strain 70-15 / ATCC MYA-4617 / FGSC 8958) GN=MGG_06172 PE=4 SV=1 - [G4N008_MAGO7]	15.18	1	7	7	38	382	382	43.1489	7.91357
G4N2X1	Aminopeptidase ypdF OS=Magnaporthe oryzae (strain 70-15 / ATCC MYA-4617 / FGSC 8958) GN=MGG_07981 PE=4 SV=1 - [G4N2X1_MAGO7]	13.65	1	5	5	16	491	491	54.6398	6.04932
G4N0Y2	Uncharacterized protein OS=Magnaporthe oryzae (strain 70-15 / ATCC MYA-4617 / FGSC 8958) GN=MGG_13009 PE=4 SV=1 - [G4N0Y2_MAGO7]	11.11	1	3	3	11	225	225	24.1232	5.88428
G4N1V9	Myosin regulatory light chain cdc4 OS=Magnaporthe oryzae (strain 70-15 / ATCC MYA-4617 / FGSC 8958) GN=MGG_09470 PE=4 SV=1 - [G4N1V9_MAGO7]	36	2	4	5	15	150	150	16.7871	4.81787
G4N0M2	Uncharacterized protein OS=Magnaporthe oryzae (strain 70-15 / ATCC MYA-4617 / FGSC 8958) GN=MGG_07748 PE=4 SV=1 - [G4N0M2_MAGO7]	6.18	1	1	1	6	178	178	17.5887	8.98291
G4MYJ6	Uncharacterized protein OS=Magnaporthe oryzae (strain 70-15 / ATCC MYA-4617 / FGSC 8958) GN=MGG_01305 PE=4 SV=1 - [G4MYJ6_MAGO7]	48.25	2	5	5	10	143	143	16.2171	4.14502
G4NHR8	Betaine aldehyde dehydrogenase OS=Magnaporthe oryzae (strain 70-15 / ATCC MYA-4617 / FGSC 8958) GN=MGG_09456 PE=3 SV=1 - [G4NHR8_MAGO7]	21.36	1	7	7	18	501	501	53.094	6.16357
G5EH72	Arg-6 protein OS=Magnaporthe oryzae (strain 70-15 / ATCC MYA-4617 / FGSC 8958) GN=MGCH7_ch7g425 PE=4 SV=1 - [G5EH72_MAGO7]	13	1	10	10	21	900	900	98.7065	7.54736
G4NFC7	MFS quinate transporter OS=Magnaporthe oryzae (strain 70-15 / ATCC MYA-4617 / FGSC 8958) GN=MGG_04225 PE=3 SV=1 - [G4NFC7_MAGO7]	19.03	2	7	7	18	536	536	58.6991	8.52881
G4N3T9	Regucalcin OS=Magnaporthe oryzae (strain 70-15 / ATCC MYA-4617 / FGSC 8958) GN=MGG_05015 PE=4 SV=1 - [G4N3T9_MAGO7]	21.05	2	6	6	11	304	304	34.0969	5.04639
G4N470	Uncharacterized protein OS=Magnaporthe oryzae (strain 70-15 / ATCC MYA-4617 / FGSC 8958) GN=MGG_16862 PE=4 SV=1 - [G4N470_MAGO7]	38.21	1	8	8	22	246	246	27.2872	8.70459
G4NBG3	NUDIX domain-containing protein OS=Magnaporthe oryzae (strain 70-15 / ATCC MYA-4617 / FGSC 8958) GN=MGG_00547 PE=4 SV=1 - [G4NBG3_MAGO7]	22.25	2	5	5	10	346	346	38.8524	4.90674
G4MTZ2	Uncharacterized protein OS=Magnaporthe oryzae (strain Y34) GN=OOU_Y34scaffold00162g12 PE=4 SV=1 - [L7IJ22_MAGOY]	11.6	3	2	2	7	181	181	17.9913	6.40479
G4MV17	5'-3' exoribonuclease 1 OS=Magnaporthe oryzae (strain 70-15 / ATCC MYA-4617 / FGSC 8958) GN=MGG_12403 PE=3 SV=1 - [G4MV17_MAGO7]	11.15	1	13	13	19	1435	1435	159.962	7.02002
G4MR95	Translational activator GCN1 OS=Magnaporthe oryzae (strain 70-15 / ATCC MYA-4617 / FGSC 8958) GN=MGG_04710 PE=4 SV=1 - [G4MR95_MAGO7]	6.8	4	16	16	27	2678	2678	289.908	6.1001
G4MZ65	NADP-dependent malic enzyme OS=Magnaporthe oryzae (strain P131) GN=OOW_P131scaffold01039g1 PE=4 SV=1 - [L7J3M3_MAGOP]	8.75	4	6	6	19	617	617	68.7597	6.25244
G4NHC2	Alcohol dehydrogenase 1 OS=Magnaporthe oryzae (strain P131) GN=OOW_P131scaffold01181g16 PE=4 SV=1 - [L7IZW2_MAGOP]	21.88	1	7	7	20	352	352	37.2514	7.31299
G4MS09	Delta-aminolevulinic acid dehydratase OS=Magnaporthe oryzae (strain 70-15 / ATCC MYA-4617 / FGSC 8958) GN=MGG_10655 PE=3 SV=1 - [G4MS09_MAGO7]	17.48	2	6	6	16	389	389	42.1474	7.25439
G4N844	Glycyl-tRNA synthetase OS=Magnaporthe oryzae (strain 70-15 / ATCC MYA-4617 / FGSC 8958) GN=MGG_06321 PE=4 SV=1 - [G4N844_MAGO7]	13.09	2	8	8	12	726	726	81.257	6.88818
G4N582	Uncharacterized protein OS=Magnaporthe oryzae (strain 70-15 / ATCC MYA-4617 / FGSC 8958) GN=MGG_06082 PE=4 SV=1 - [G4N582_MAGO7]	21.69	1	10	10	18	484	484	54.6201	8.96826
G4MM52	Succinyl-CoA ligase subunit alpha OS=Magnaporthe oryzae (strain 70-15 / ATCC MYA-4617 / FGSC 8958) GN=MGG_05480 PE=3 SV=1 - [G4MM52_MAGO7]	18.32	1	4	4	17	333	333	34.446	8.86572
G4N2N8	Uncharacterized protein OS=Magnaporthe oryzae (strain 70-15 / ATCC MYA-4617 / FGSC 8958) GN=MGG_04870 PE=4 SV=1 - [G4N2N8_MAGO7]	21.35	1	9	9	20	576	576	64.0684	5.2876
G4NG71	T-complex protein 1 subunit alpha OS=Magnaporthe oryzae (strain 70-15 / ATCC MYA-4617 / FGSC 8958) GN=MGG_10358 PE=3 SV=1 - [G4NG71_MAGO7]	19.61	1	10	10	21	566	566	61.6011	6.56592
G4MQW5	Acidic mammalian chitinase OS=Magnaporthe oryzae (strain 70-15 / ATCC MYA-4617 / FGSC 8958) GN=MGG_04732 PE=3 SV=1 - [G4MQW5_MAGO7]	15.7	1	6	6	28	433	433	45.7605	5.36377
G4MZ14	Saccharopine dehydrogenase [NAD(+), L-lysine-forming] OS=Magnaporthe oryzae (strain P131) GN=OOW_P131scaffold00131g6 PE=3 SV=1 - [L7JPB5_MAGOP]	22.47	1	8	8	27	365	365	40.3167	5.70654
G4NLA2	Actin-related protein 2/3 complex subunit 4 OS=Magnaporthe oryzae (strain 70-15 / ATCC MYA-4617 / FGSC 8958) GN=MGG_02971 PE=3 SV=1 - [G4NLA2_MAGO7]	31.95	2	4	4	23	169	169	19.5843	7.04932
G4N7H4	Uncharacterized protein OS=Magnaporthe oryzae (strain 70-15 / ATCC MYA-4617 / FGSC 8958) GN=MGG_06418 PE=4 SV=1 - [G4N7H4_MAGO7]	6.79	1	3	3	19	545	545	61.5851	5.40186
Q2KEX5	Putative uncharacterized protein OS=Magnaporthe oryzae (strain 70-15 / ATCC MYA-4617 / FGSC 8958) GN=MGCH7_ch7g911 PE=4 SV=1 - [Q2KEX5_MAGO7]	7.14	2	3	3	13	588	588	64.1344	9.20264
G4MRN0	Putative uncharacterized protein OS=Magnaporthe oryzae PE=2 SV=1 - [D4NXE9_MAGOR]	55.26	1	5	5	19	114	114	12.7703	5.8208
G4MXF2	Uncharacterized protein OS=Magnaporthe oryzae (strain P131) GN=OOW_P131scaffold01689g10 PE=4 SV=1 - [L7IQ83_MAGOP]	8.85	1	3	3	9	407	407	43.4516	7.00537
G4N5J5	Profilin OS=Magnaporthe oryzae (strain P131) GN=OOW_P131scaffold00957g21 PE=3 SV=1 - [L7J726_MAGOP]	67.18	1	6	6	21	131	131	13.886	5.77002
G4NH66	3-oxoacyl-[acyl-carrier-protein] reductase OS=Magnaporthe oryzae (strain 70-15 / ATCC MYA-4617 / FGSC 8958) GN=MGG_03921 PE=4 SV=1 - [G4NH66_MAGO7]	25.16	2	7	7	20	318	318	32.7234	7.1665
G4N453	Aspartate aminotransferase OS=Magnaporthe oryzae (strain 70-15 / ATCC MYA-4617 / FGSC 8958) GN=MGG_05067 PE=4 SV=1 - [G4N453_MAGO7]	17.33	2	7	7	18	404	404	44.9065	6.7417
G4N818	Acyl carrier protein OS=Magnaporthe oryzae (strain P131) GN=OOW_P131scaffold00333g15 PE=3 SV=1 - [L7JGA2_MAGOP]	20	1	3	3	27	145	145	15.537	5.97314
A4QR21	NADH-cytochrome b5 reductase 2 OS=Magnaporthe oryzae (strain 70-15 / ATCC MYA-4617 / FGSC 8958) GN=MCR1 PE=3 SV=1 - [MCR1_MAGO7]	23.26	1	6	6	16	331	331	36.5511	9.27588
G4MUJ8	WD repeat-containing protein 2 OS=Magnaporthe oryzae (strain P131) GN=OOW_P131scaffold00421g1 PE=4 SV=1 - [L7JE54_MAGOP]	26.15	1	12	12	20	608	608	63.4518	7.38623
G4MUJ4	Aldehyde dehydrogenase OS=Magnaporthe oryzae (strain 70-15 / ATCC MYA-4617 / FGSC 8958) GN=MGG_07270 PE=3 SV=1 - [G4MUJ4_MAGO7]	23.36	2	10	10	29	548	548	60.8982	8.54346
G4MV01	Delta(3,5)-Delta(2,4)-dienoyl-CoA isomerase OS=Magnaporthe oryzae (strain 70-15 / ATCC MYA-4617 / FGSC 8958) GN=MGG_07309 PE=4 SV=1 - [G4MV01_MAGO7]	38.95	1	11	11	24	285	285	30.7969	7.50342
Q2KGF7	Putative uncharacterized protein OS=Magnaporthe oryzae (strain 70-15 / ATCC MYA-4617 / FGSC 8958) GN=MGCH7_ch7g378 PE=4 SV=1 - [Q2KGF7_MAGO7]	55.36	2	5	5	30	112	112	12.2651	6.771
G4NKT8	Nicotinate-nucleotide pyrophosphorylase [carboxylating] OS=Magnaporthe oryzae (strain P131) GN=OOW_P131scaffold01007g16 PE=3 SV=1 - [L7J6G6_MAGOP]	30.23	2	8	8	32	301	301	31.9833	6.72705
G4NAS8	Uncharacterized protein OS=Magnaporthe oryzae (strain P131) GN=OOW_P131scaffold01199g5 PE=4 SV=1 - [L7IZW0_MAGOP]	20.48	1	11	11	20	620	620	67.2952	9.26123
G4NFP9	High-affinity nicotinic acid transporter OS=Magnaporthe oryzae (strain 70-15 / ATCC MYA-4617 / FGSC 8958) GN=MGG_08760 PE=4 SV=1 - [G4NFP9_MAGO7]	19.81	4	7	8	21	515	515	57.4692	7.95752
G4N0I8	PRA1 family protein OS=Magnaporthe oryzae (strain 70-15 / ATCC MYA-4617 / FGSC 8958) GN=MGG_15244 PE=3 SV=1 - [G4N0I8_MAGO7]	32.95	2	5	5	21	176	176	19.5663	7.18115
G4N3T0	Uncharacterized protein OS=Magnaporthe oryzae (strain 70-15 / ATCC MYA-4617 / FGSC 8958) GN=MGG_05007 PE=4 SV=1 - [G4N3T0_MAGO7]	7.68	1	4	4	8	664	664	69.7853	9.18799
G4MVH7	Uncharacterized protein OS=Magnaporthe oryzae (strain 70-15 / ATCC MYA-4617 / FGSC 8958) GN=MGG_07369 PE=4 SV=1 - [G4MVH7_MAGO7]	28.71	2	9	9	16	411	411	43.7767	8.71924
G4N0H1	Uncharacterized protein OS=Magnaporthe oryzae (strain 70-15 / ATCC MYA-4617 / FGSC 8958) GN=MGG_05797 PE=4 SV=1 - [G4N0H1_MAGO7]	2.77	1	1	1	5	541	541	61.2025	6.65381
G4N589	Ribokinase OS=Magnaporthe oryzae (strain 70-15 / ATCC MYA-4617 / FGSC 8958) GN=MGG_06089 PE=3 SV=1 - [G4N589_MAGO7]	19.94	2	5	5	13	326	326	33.5706	5.18604
A4RM13	GDP-mannose transporter OS=Magnaporthe oryzae (strain 70-15 / ATCC MYA-4617 / FGSC 8958) GN=VRG4 PE=3 SV=1 - [GMT_MAGO7]	12.18	1	3	3	11	394	394	42.3538	9.01221
G4N3H4	Phosphoglycerate mutase OS=Magnaporthe oryzae (strain 70-15 / ATCC MYA-4617 / FGSC 8958) GN=MGG_04960 PE=4 SV=1 - [G4N3H4_MAGO7]	48.22	2	9	9	38	253	253	28.0844	5.66846
G4NEJ2	Lactose permease OS=Magnaporthe oryzae (strain 70-15 / ATCC MYA-4617 / FGSC 8958) GN=MGG_00085 PE=3 SV=1 - [G4NEJ2_MAGO7]	6.25	1	3	3	10	544	544	59.8583	5.80811
G4N9Y8	Isoleucyl-tRNA synthetase OS=Magnaporthe oryzae (strain 70-15 / ATCC MYA-4617 / FGSC 8958) GN=MGG_03220 PE=3 SV=1 - [G4N9Y8_MAGO7]	19.13	1	17	17	26	1077	1077	123.986	6.48096
G4N7C2	Nuclear movement protein nudC OS=Magnaporthe oryzae (strain 70-15 / ATCC MYA-4617 / FGSC 8958) GN=MGG_03604 PE=4 SV=1 - [G4N7C2_MAGO7]	35.6	1	7	7	15	191	191	21.3349	5.69385
G4N9V6	Peroxisomal membrane protein PMP47A OS=Magnaporthe oryzae (strain P131) GN=OOW_P131scaffold01311g24 PE=3 SV=1 - [L7IW36_MAGOP]	16.82	2	5	5	13	333	333	35.9172	9.80322
G4MTI0	ATP-binding cassette sub-family G member 2 OS=Magnaporthe oryzae (strain P131) GN=OOW_P131scaffold01457g19 PE=4 SV=1 - [L7IUF5_MAGOP]	12.51	1	12	12	30	1079	1079	118.461	5.97314
G4MMW9	Clathrin light chain OS=Magnaporthe oryzae (strain 70-15 / ATCC MYA-4617 / FGSC 8958) GN=MGG_06876 PE=3 SV=1 - [G4MMW9_MAGO7]	23.08	2	8	8	20	234	234	25.5011	4.53857
G4ML92	Uncharacterized protein OS=Magnaporthe oryzae (strain 70-15 / ATCC MYA-4617 / FGSC 8958) GN=MGG_06729 PE=4 SV=1 - [G4ML92_MAGO7]	12.06	2	4	4	13	456	456	48.3861	5.2749
G4N4K5	Uncharacterized protein OS=Magnaporthe oryzae (strain 70-15 / ATCC MYA-4617 / FGSC 8958) GN=MGG_05982 PE=4 SV=1 - [G4N4K5_MAGO7]	27.54	1	3	3	15	138	138	15.3162	5.09717
G4N565	Cut9-interacting protein scn1 OS=Magnaporthe oryzae (strain P131) GN=OOW_P131scaffold00270g1 PE=4 SV=1 - [L7JIF3_MAGOP]	12.23	2	3	4	7	417	417	45.6335	5.66846
G4MTH3	V-type proton ATPase subunit F OS=Magnaporthe oryzae (strain 70-15 / ATCC MYA-4617 / FGSC 8958) GN=MGG_01556 PE=3 SV=1 - [G4MTH3_MAGO7]	37.3	1	4	4	14	126	126	13.9392	5.8208
G4N2N1	Cullin-associated NEDD8-dissociated protein 2 OS=Magnaporthe oryzae (strain 70-15 / ATCC MYA-4617 / FGSC 8958) GN=MGG_04863 PE=4 SV=1 - [G4N2N1_MAGO7]	11.91	1	14	14	16	1369	1369	147.609	5.61768
G4NH48	Uncharacterized protein OS=Magnaporthe oryzae (strain 70-15 / ATCC MYA-4617 / FGSC 8958) GN=MGG_03940 PE=4 SV=1 - [G4NH48_MAGO7]	27.23	3	10	10	27	470	470	52.6235	5.98584
G4MXJ6	Uncharacterized protein OS=Magnaporthe oryzae (strain P131) GN=OOW_P131scaffold01065g4 PE=4 SV=1 - [L7J4Z4_MAGOP]	22.45	1	4	4	12	196	196	21.0481	10.4624
G4NAA0	Aflatoxin B1 aldehyde reductase member 2 OS=Magnaporthe oryzae (strain P131) GN=OOW_P131scaffold00599g12 PE=4 SV=1 - [L7JAP1_MAGOP]	38.86	1	12	12	29	350	350	38.9708	6.45557
G4ML28	Mitochondrial import receptor subunit tom-40 OS=Magnaporthe oryzae (strain 70-15 / ATCC MYA-4617 / FGSC 8958) GN=MGG_08637 PE=4 SV=1 - [G4ML28_MAGO7]	27.89	1	7	7	24	355	355	38.3298	6.25244
G4N7P1	CDP-diacylglycerol--serine O-phosphatidyltransferase OS=Magnaporthe oryzae (strain 70-15 / ATCC MYA-4617 / FGSC 8958) GN=MGG_03550 PE=3 SV=1 - [G4N7P1_MAGO7]	22.73	1	5	5	13	242	242	26.1053	8.32373
G4NF48	Derlin OS=Magnaporthe oryzae (strain 70-15 / ATCC MYA-4617 / FGSC 8958) GN=MGG_12174 PE=3 SV=1 - [G4NF48_MAGO7]	27.1	1	6	6	16	262	262	28.6759	9.26123
G4N4U7	Eukaryotic translation initiation factor 5A OS=Magnaporthe oryzae PE=2 SV=1 - [D4NXC5_MAGOR]	21.95	1	4	4	17	164	164	18.249	5.42725
G5EHQ2	12-oxophytodienoate reductase 1 OS=Magnaporthe oryzae (strain 70-15 / ATCC MYA-4617 / FGSC 8958) GN=MGCH7_ch7g132 PE=4 SV=1 - [G5EHQ2_MAGO7]	27.87	2	11	11	24	409	409	45.8719	5.98584
G4N6P3	Uncharacterized protein OS=Magnaporthe oryzae (strain 70-15 / ATCC MYA-4617 / FGSC 8958) GN=MGG_12813 PE=4 SV=1 - [G4N6P3_MAGO7]	9.14	3	4	4	19	514	514	56.194	6.52197
G4NCP4	Delta(3,5)-Delta(2,4)-dienoyl-CoA isomerase OS=Magnaporthe oryzae (strain 70-15 / ATCC MYA-4617 / FGSC 8958) GN=MGG_00359 PE=4 SV=1 - [G4NCP4_MAGO7]	31.79	1	7	7	17	280	280	30.6251	6.43018
G4N4V4	ABC transporter OS=Magnaporthe oryzae (strain 70-15 / ATCC MYA-4617 / FGSC 8958) GN=MGG_06024 PE=4 SV=1 - [G4N4V4_MAGO7]	0.52	2	1	1	12	1354	1354	147.016	8.98291
G4N4U1	26S protease regulatory subunit 6A OS=Magnaporthe oryzae (strain 70-15 / ATCC MYA-4617 / FGSC 8958) GN=MGG_12925 PE=3 SV=1 - [G4N4U1_MAGO7]	14.22	2	5	5	10	464	464	51.7467	5.12256
G4MSB9	Uncharacterized protein OS=Magnaporthe oryzae (strain 70-15 / ATCC MYA-4617 / FGSC 8958) GN=MGG_15540 PE=4 SV=1 - [G4MSB9_MAGO7]	16.54	2	4	4	10	387	387	41.1034	4.729
G4NIU4	40S ribosomal protein S17 OS=Magnaporthe oryzae PE=2 SV=1 - [D4NXB7_MAGOR]	36.49	1	5	5	26	148	148	17.1052	9.93506
G4NBH2	Acid phosphatase OS=Magnaporthe oryzae (strain 70-15 / ATCC MYA-4617 / FGSC 8958) GN=MGG_00538 PE=3 SV=1 - [G4NBH2_MAGO7]	9.38	2	5	5	17	597	597	65.7333	6.3667
G4N0H7	Guanine deaminase OS=Magnaporthe oryzae (strain 70-15 / ATCC MYA-4617 / FGSC 8958) GN=MGG_13308 PE=4 SV=1 - [G4N0H7_MAGO7]	27.67	2	11	11	19	459	459	50.5731	6.37939
G4N6X2	26S proteasome regulatory subunit RPN7 OS=Magnaporthe oryzae (strain 70-15 / ATCC MYA-4617 / FGSC 8958) GN=MGG_06504 PE=4 SV=1 - [G4N6X2_MAGO7]	25.4	2	11	11	31	496	496	54.313	5.85889
G4MZD1	Integral membrane protein OS=Magnaporthe oryzae (strain 70-15 / ATCC MYA-4617 / FGSC 8958) GN=MGG_04378 PE=4 SV=1 - [G4MZD1_MAGO7]	18.77	2	8	8	26	522	522	58.2992	8.07471
G4MZF8	Dolichyl-phosphate-mannose-protein mannosyltransferase 4 OS=Magnaporthe oryzae (strain 70-15 / ATCC MYA-4617 / FGSC 8958) GN=MGG_04427 PE=4 SV=1 - [G4MZF8_MAGO7]	14.73	2	13	13	27	774	774	88.4613	8.90967
G4MST5	Uncharacterized protein OS=Magnaporthe oryzae (strain 70-15 / ATCC MYA-4617 / FGSC 8958) GN=MGG_11385 PE=4 SV=1 - [G4MST5_MAGO7]	20.99	3	6	6	22	343	343	39.0827	5.8335
G4N5R0	60S ribosomal protein L34-B OS=Magnaporthe oryzae (strain 70-15 / ATCC MYA-4617 / FGSC 8958) GN=MGG_05296 PE=4 SV=1 - [G4N5R0_MAGO7]	37.07	1	5	5	27	116	116	13.1942	10.77
A4QSS5	ATP-dependent RNA helicase DBP2 OS=Magnaporthe oryzae (strain 70-15 / ATCC MYA-4617 / FGSC 8958) GN=DBP2 PE=3 SV=1 - [DBP2_MAGO7]	19.34	3	7	8	18	548	548	59.1007	9.15869
G4N077	DnaJ domain-containing protein OS=Magnaporthe oryzae (strain P131) GN=OOW_P131scaffold00984g39 PE=4 SV=1 - [L7J5C2_MAGOP]	18.69	1	6	6	18	428	428	47.2143	9.5249
G4NAZ8	Arginase OS=Magnaporthe oryzae (strain 70-15 / ATCC MYA-4617 / FGSC 8958) GN=MGG_00671 PE=3 SV=1 - [G4NAZ8_MAGO7]	15.87	2	5	5	24	378	378	40.4818	6.53662
G4MS26	Uncharacterized protein OS=Magnaporthe oryzae (strain 70-15 / ATCC MYA-4617 / FGSC 8958) GN=MGG_15479 PE=4 SV=1 - [G4MS26_MAGO7]	17.82	1	4	4	16	303	303	32.2549	5.32568
G4N7A2	General alpha-glucoside permease OS=Magnaporthe oryzae (strain 70-15 / ATCC MYA-4617 / FGSC 8958) GN=MGG_12836 PE=4 SV=1 - [G4N7A2_MAGO7]	14.1	2	8	9	17	688	688	74.6496	5.37646
G4MMD4	Betaine aldehyde dehydrogenase OS=Magnaporthe oryzae (strain 70-15 / ATCC MYA-4617 / FGSC 8958) GN=MGG_01991 PE=3 SV=1 - [G4MMD4_MAGO7]	27.63	1	10	10	22	532	532	56.6081	6.53662
G4MKQ3	EF hand domain-containing protein OS=Magnaporthe oryzae (strain 70-15 / ATCC MYA-4617 / FGSC 8958) GN=MGG_06649 PE=4 SV=1 - [G4MKQ3_MAGO7]	5	2	4	4	9	1300	1300	135.288	4.99561
G4MYG9	Carnitine-acylcarnitine carrier protein OS=Magnaporthe oryzae GN=CRC1 PE=3 SV=1 - [D2XZ06_MAGOR]	22.03	1	7	7	14	345	345	35.8558	9.70068
G4N476	Uncharacterized protein OS=Magnaporthe oryzae (strain 70-15 / ATCC MYA-4617 / FGSC 8958) GN=MGG_05083 PE=4 SV=1 - [G4N476_MAGO7]	8.22	1	1	1	7	146	146	13.8929	6.88818
G4N707	Protein phosphatase 1 regulatory subunit SDS22 OS=Magnaporthe oryzae (strain P131) GN=OOW_P131scaffold00429g7 PE=4 SV=1 - [L7JDB4_MAGOP]	28.35	1	8	9	19	381	381	42.9365	5.10986
G4N3Q1	26S proteasome regulatory subunit rpn11 OS=Magnaporthe oryzae (strain P131) GN=OOW_P131scaffold00039g3 PE=4 SV=1 - [L7JS19_MAGOP]	18.51	2	5	5	14	335	335	37.5299	6.02393
G4MY43	28 kDa ribonucleoprotein OS=Magnaporthe oryzae (strain P131) GN=OOW_P131scaffold00426g6 PE=4 SV=1 - [L7JD17_MAGOP]	10.29	1	4	4	7	486	486	50.4773	5.32568
G4NFA9	Peptide methionine sulfoxide reductase msrB/msrA OS=Magnaporthe oryzae (strain P131) GN=OOW_P131scaffold00562g20 PE=3 SV=1 - [L7J9B8_MAGOP]	26.44	1	5	5	16	208	208	23.4255	7.59131
G5EH88	Uncharacterized protein OS=Magnaporthe oryzae (strain 70-15 / ATCC MYA-4617 / FGSC 8958) GN=MGCH7_ch7g1093 PE=4 SV=1 - [G5EH88_MAGO7]	41.81	1	6	6	21	177	177	18.9487	6.771
G4NFL4	X-Pro dipeptidyl-peptidase OS=Magnaporthe oryzae (strain 70-15 / ATCC MYA-4617 / FGSC 8958) GN=MGG_08785 PE=4 SV=1 - [G4NFL4_MAGO7]	22.17	1	10	10	18	591	591	66.4942	6.45557
G4MWB9	Uncharacterized protein OS=Magnaporthe oryzae (strain 70-15 / ATCC MYA-4617 / FGSC 8958) GN=MGG_08374 PE=4 SV=1 - [G4MWB9_MAGO7]	28.32	1	9	9	16	399	399	42.7398	5.61768
G4MYQ7	Uncharacterized protein OS=Magnaporthe oryzae (strain 70-15 / ATCC MYA-4617 / FGSC 8958) GN=MGG_12291 PE=4 SV=1 - [G4MYQ7_MAGO7]	12.38	2	7	7	13	719	719	78.5437	4.86865
G5EH41	Alpha-xylosidase OS=Magnaporthe oryzae (strain 70-15 / ATCC MYA-4617 / FGSC 8958) GN=MGCH7_ch7g28 PE=3 SV=1 - [G5EH41_MAGO7]	22.04	1	11	11	21	667	667	76.5586	5.73193
G4MY64	Thioredoxin reductase OS=Magnaporthe oryzae (strain 70-15 / ATCC MYA-4617 / FGSC 8958) GN=MGG_01284 PE=3 SV=1 - [G4MY64_MAGO7]	32.93	2	8	8	20	328	328	35.2116	5.56689
G4MMK7	Uncharacterized protein OS=Magnaporthe oryzae (strain 70-15 / ATCC MYA-4617 / FGSC 8958) GN=MGG_06871 PE=4 SV=1 - [G4MMK7_MAGO7]	18.66	1	5	5	19	343	343	37.5386	9.18799
G4N4F1	Uncharacterized protein OS=Magnaporthe oryzae (strain 70-15 / ATCC MYA-4617 / FGSC 8958) GN=MGG_16869 PE=4 SV=1 - [G4N4F1_MAGO7]	18.46	1	2	2	14	130	130	14.3471	6.75635
G4MSY8	Uncharacterized protein OS=Magnaporthe oryzae (strain 70-15 / ATCC MYA-4617 / FGSC 8958) GN=MGG_01490 PE=4 SV=1 - [G4MSY8_MAGO7]	27.93	2	7	7	14	290	290	31.5689	5.23682
G4MXI4	Naringenin 3-dioxygenase OS=Magnaporthe oryzae (strain P131) GN=OOW_P131scaffold00497g5 PE=3 SV=1 - [L7JCY8_MAGOP]	32.83	1	9	9	16	396	396	42.966	5.74463
G4N7S1	26S proteasome regulatory subunit RPN9 OS=Magnaporthe oryzae (strain 70-15 / ATCC MYA-4617 / FGSC 8958) GN=MGG_03524 PE=4 SV=1 - [G4N7S1_MAGO7]	30.37	1	10	10	32	382	382	43.4595	5.38916
G4N390	Methionine synthase OS=Magnaporthe oryzae (strain 70-15 / ATCC MYA-4617 / FGSC 8958) GN=MGG_10852 PE=4 SV=1 - [G4N390_MAGO7]	34.13	1	12	12	28	378	378	42.4925	6.03662
G4MKI3	Oxidoreductase domain-containing protein OS=Magnaporthe oryzae (strain 70-15 / ATCC MYA-4617 / FGSC 8958) GN=MGG_05346 PE=4 SV=1 - [G4MKI3_MAGO7]	31.89	1	9	9	24	370	370	40.6119	6.72705
G4N5N3	Uncharacterized protein OS=Magnaporthe oryzae (strain 70-15 / ATCC MYA-4617 / FGSC 8958) GN=MGG_05271 PE=4 SV=1 - [G4N5N3_MAGO7]	18.5	2	5	5	12	319	319	33.8198	9.94971
G4NCJ2	40S ribosomal protein S23 OS=Magnaporthe oryzae (strain 70-15 / ATCC MYA-4617 / FGSC 8958) GN=MGG_01066 PE=3 SV=1 - [G4NCJ2_MAGO7]	48.28	1	6	6	30	145	145	15.8588	10.6235
G4MXF4	Sm snRNP core protein Smg1 OS=Magnaporthe oryzae (strain P131) GN=OOW_P131scaffold01689g12 PE=4 SV=1 - [L7IRB6_MAGOP]	21.59	1	2	2	16	88	88	9.50801	8.45557
G4MXT4	Glutamate dehydrogenase OS=Magnaporthe oryzae (strain 70-15 / ATCC MYA-4617 / FGSC 8958) GN=MGG_08074 PE=3 SV=1 - [G4MXT4_MAGO7]	37.15	2	13	13	20	463	463	49.6852	6.46826
G4MUD1	Phosphomannomutase OS=Magnaporthe oryzae (strain 70-15 / ATCC MYA-4617 / FGSC 8958) GN=MGG_01637 PE=3 SV=1 - [G4MUD1_MAGO7]	18.18	1	5	5	16	264	264	30.0672	5.75732
G4MQZ0	Galactose oxidase OS=Magnaporthe oryzae (strain 70-15 / ATCC MYA-4617 / FGSC 8958) GN=MGG_02368 PE=4 SV=1 - [G4MQZ0_MAGO7]	9.72	1	4	4	8	669	669	70.8451	6.02393
G4N2S3	Uncharacterized protein OS=Magnaporthe oryzae (strain 70-15 / ATCC MYA-4617 / FGSC 8958) GN=MGG_04898 PE=4 SV=1 - [G4N2S3_MAGO7]	46.11	2	7	7	21	167	167	19.937	5.38916
G4N7U7	Amylase-binding protein AbpA OS=Magnaporthe oryzae (strain 70-15 / ATCC MYA-4617 / FGSC 8958) GN=MGG_06358 PE=4 SV=1 - [G4N7U7_MAGO7]	3.88	2	2	2	10	799	799	83.5246	4.97021
A4RLA0	Uncharacterized protein OS=Magnaporthe oryzae (strain 70-15 / ATCC MYA-4617 / FGSC 8958) GN=MGG_14772 PE=4 SV=1 - [A4RLA0_MAGO7]	29.92	1	3	3	9	127	127	13.9181	4.83057
G4N861	Xylulose kinase OS=Magnaporthe oryzae (strain 70-15 / ATCC MYA-4617 / FGSC 8958) GN=MGG_12860 PE=4 SV=1 - [G4N861_MAGO7]	12.13	2	6	6	13	577	577	62.6303	5.47803
G4NC33	Brefeldin A resistance protein OS=Magnaporthe oryzae (strain P131) GN=OOW_P131scaffold00225g36 PE=3 SV=1 - [L7JKL2_MAGOP]	11.25	4	12	12	21	1484	1484	165.325	6.68311
G4NCL5	S-adenosylmethionine synthase OS=Magnaporthe oryzae (strain P131) GN=OOW_P131scaffold00220g1 PE=3 SV=1 - [L7JKT1_MAGOP]	12.44	1	5	5	14	394	394	42.827	6.01123
G4N4W5	Peptidylprolyl isomerase OS=Magnaporthe oryzae (strain 70-15 / ATCC MYA-4617 / FGSC 8958) GN=MGG_06035 PE=4 SV=1 - [G4N4W5_MAGO7]	56.64	2	5	5	17	113	113	11.9681	5.49072
G4MYB0	CK1/CK1/CK1-G protein kinase OS=Magnaporthe oryzae (strain 70-15 / ATCC MYA-4617 / FGSC 8958) GN=MGG_08097 PE=3 SV=1 - [G4MYB0_MAGO7]	15.7	1	6	6	11	446	446	50.2695	9.45166
G4NCR8	PH domain-containing protein OS=Magnaporthe oryzae (strain 70-15 / ATCC MYA-4617 / FGSC 8958) GN=MGG_01047 PE=4 SV=1 - [G4NCR8_MAGO7]	22.35	3	9	9	15	519	519	56.2113	6.78564
G4MWE8	Uncharacterized protein OS=Magnaporthe oryzae (strain 70-15 / ATCC MYA-4617 / FGSC 8958) GN=MGG_15936 PE=4 SV=1 - [G4MWE8_MAGO7]	28.3	2	8	8	20	364	364	39.3709	6.22705
G4N253	Uncharacterized protein OS=Magnaporthe oryzae (strain P131) GN=OOW_P131scaffold00121g9 PE=3 SV=1 - [L7JNH5_MAGOP]	21.01	1	6	6	13	395	395	41.3024	4.80518
G4MKQ8	Uncharacterized protein OS=Magnaporthe oryzae (strain 70-15 / ATCC MYA-4617 / FGSC 8958) GN=MGG_06654 PE=3 SV=1 - [G4MKQ8_MAGO7]	26.22	1	6	6	17	267	267	30.7576	8.6167
G4MXY6	Uncharacterized protein OS=Magnaporthe oryzae (strain 70-15 / ATCC MYA-4617 / FGSC 8958) GN=MGG_10868 PE=4 SV=1 - [G4MXY6_MAGO7]	26.6	1	16	16	30	842	842	92.876	6.49365
G4ML85	1,3-beta-glucanosyltransferase OS=Magnaporthe oryzae (strain 70-15 / ATCC MYA-4617 / FGSC 8958) GN=MGG_06722 PE=3 SV=1 - [G4ML85_MAGO7]	10.93	2	4	4	23	485	485	51.1887	5.78271
G4N1Y8	Beta-xylanase OS=Magnaporthe oryzae (strain P131) GN=OOW_P131scaffold00655g3 PE=3 SV=1 - [L7J7U3_MAGOP]	21.27	1	7	7	23	362	362	40.3235	5.57959
G4MZ22	Uncharacterized protein OS=Magnaporthe oryzae (strain 70-15 / ATCC MYA-4617 / FGSC 8958) GN=MGG_01364 PE=4 SV=1 - [G4MZ22_MAGO7]	14.44	2	12	12	22	1011	1011	113.213	6.75635
G4N1E4	CCR4-Not complex subunit Caf16 OS=Magnaporthe oryzae (strain P131) GN=OOW_P131scaffold00321g3 PE=4 SV=1 - [L7JIF5_MAGOP]	34.14	1	8	8	17	290	290	31.5294	6.7417
G4N4E1	Cytochrome b-c1 complex subunit Rieske, mitochondrial OS=Magnaporthe oryzae (strain P131) GN=OOW_P131scaffold00347g3 PE=4 SV=1 - [L7JF47_MAGOP]	19.92	1	5	5	18	236	236	25.1367	8.32373
G4NAF7	Serine-rich protein OS=Magnaporthe oryzae PE=2 SV=1 - [D4NXC2_MAGOR]	20	1	3	3	7	210	210	20.575	6.03662
G5EH74	Uncharacterized protein OS=Magnaporthe oryzae (strain 70-15 / ATCC MYA-4617 / FGSC 8958) GN=MGCH7_ch7g505 PE=4 SV=1 - [G5EH74_MAGO7]	4.36	1	1	1	9	275	275	27.8751	7.10791
G4NIR4	Sulfite reductase OS=Magnaporthe oryzae (strain 70-15 / ATCC MYA-4617 / FGSC 8958) GN=MGG_04144 PE=3 SV=1 - [G4NIR4_MAGO7]	6.07	2	8	8	16	1533	1533	169.083	6.23975
A4QVH4	Cytochrome c peroxidase, mitochondrial OS=Magnaporthe oryzae (strain 70-15 / ATCC MYA-4617 / FGSC 8958) GN=CCP1 PE=3 SV=1 - [CCPR_MAGO7]	26.8	2	7	7	17	362	362	39.8358	8.32373
G4NGP8	Uncharacterized protein OS=Magnaporthe oryzae (strain P131) GN=OOW_P131scaffold01683g43 PE=4 SV=1 - [L7IQM3_MAGOP]	12.7	1	6	6	13	677	677	74.9347	5.87158
G4NHU4	Endoglucanase family 5 glycoside hydrolase OS=Magnaporthe oryzae (strain P131) GN=OOW_P131scaffold00348g5 PE=3 SV=1 - [L7JH16_MAGOP]	26.22	2	11	11	22	473	473	54.385	6.18896
G4N4A8	Zinc knuckle domain-containing protein OS=Magnaporthe oryzae (strain 70-15 / ATCC MYA-4617 / FGSC 8958) GN=MGG_05948 PE=4 SV=1 - [G4N4A8_MAGO7]	23.62	2	3	3	8	199	199	19.7623	8.04541
G4NB93	Ubiquitin-conjugating enzyme E2 8 OS=Magnaporthe oryzae (strain 70-15 / ATCC MYA-4617 / FGSC 8958) GN=MGG_00600 PE=3 SV=1 - [G4NB93_MAGO7]	24.86	2	3	3	14	173	173	19.2402	4.38623
G4MMW8	Uncharacterized protein OS=Magnaporthe oryzae (strain P131) GN=OOW_P131scaffold01268g20 PE=4 SV=1 - [L7IXI1_MAGOP]	37.14	2	3	3	13	70	70	8.23826	10.2866
G4NE41	Mannan polymerase complexes MNN9 subunit OS=Magnaporthe oryzae (strain 70-15 / ATCC MYA-4617 / FGSC 8958) GN=MGG_00171 PE=4 SV=1 - [G4NE41_MAGO7]	14.21	1	3	3	6	373	373	41.7633	8.86572
A4QT78	Eukaryotic translation initiation factor 3 subunit H OS=Magnaporthe oryzae (strain 70-15 / ATCC MYA-4617 / FGSC 8958) GN=MGG_05156 PE=3 SV=1 - [EIF3H_MAGO7]	27	2	10	10	23	363	363	40.4525	6.69775
G4NBQ1	Poly(RC)-binding protein 3 OS=Magnaporthe oryzae (strain 70-15 / ATCC MYA-4617 / FGSC 8958) GN=MGG_00514 PE=4 SV=1 - [G4NBQ1_MAGO7]	13.25	2	5	5	12	483	483	50.4103	7.23975
G4N6E3	Choline-sulfatase OS=Magnaporthe oryzae (strain P131) GN=OOW_P131scaffold01302g38 PE=4 SV=1 - [L7IWK0_MAGOP]	17.79	2	8	8	13	562	562	62.8941	5.74463
P33281	C-8 sterol isomerase OS=Magnaporthe oryzae (strain 70-15 / ATCC MYA-4617 / FGSC 8958) GN=ERG2 PE=3 SV=1 - [ERG2_MAGO7]	39.82	1	6	6	32	221	221	24.7054	6.20166
G4N9F3	Uncharacterized protein OS=Magnaporthe oryzae (strain 70-15 / ATCC MYA-4617 / FGSC 8958) GN=MGG_03298 PE=4 SV=1 - [G4N9F3_MAGO7]	7.51	1	3	3	10	493	493	54.6971	8.45557
G4NBS4	Uncharacterized protein OS=Magnaporthe oryzae (strain P131) GN=OOW_P131scaffold00224g20 PE=4 SV=1 - [L7JK83_MAGOP]	23.61	1	5	5	18	216	216	23.8044	6.78564
G4MZL9	GRAM domain-containing protein YSP2 OS=Magnaporthe oryzae (strain 70-15 / ATCC MYA-4617 / FGSC 8958) GN=MGG_11211 PE=4 SV=1 - [G4MZL9_MAGO7]	5.91	2	5	5	10	1184	1184	126.746	7.43018
G4MUT5	Ubiquitin carboxyl-terminal hydrolase OS=Magnaporthe oryzae (strain 70-15 / ATCC MYA-4617 / FGSC 8958) GN=MGG_01683 PE=3 SV=1 - [G4MUT5_MAGO7]	21.03	1	5	5	10	252	252	27.1117	4.90674
G4N879	Uncharacterized protein OS=Magnaporthe oryzae (strain P131) GN=OOW_P131scaffold01171g5 PE=4 SV=1 - [L7J012_MAGOP]	21.81	1	7	7	16	509	509	55.6943	6.01123
G4NC13	Uncharacterized protein OS=Magnaporthe oryzae (strain 70-15 / ATCC MYA-4617 / FGSC 8958) GN=MGG_11575 PE=4 SV=1 - [G4NC13_MAGO7]	30.77	2	7	7	18	247	247	27.7159	5.49072
G4N3H0	Uncharacterized protein OS=Magnaporthe oryzae (strain 70-15 / ATCC MYA-4617 / FGSC 8958) GN=MGG_04956 PE=4 SV=1 - [G4N3H0_MAGO7]	19.29	1	12	12	24	700	700	75.5922	7.2251
G4MXQ3	Uncharacterized protein OS=Magnaporthe oryzae (strain 70-15 / ATCC MYA-4617 / FGSC 8958) GN=MGG_08045 PE=4 SV=1 - [G4MXQ3_MAGO7]	16.07	1	7	7	21	535	535	56.3439	5.26221
G4MVW5	Carboxylic ester hydrolase OS=Magnaporthe oryzae (strain 70-15 / ATCC MYA-4617 / FGSC 8958) GN=MGG_15094 PE=3 SV=1 - [G4MVW5_MAGO7]	19.56	1	7	7	14	501	501	53.2291	4.86865
G4NC59	UTR2 protein OS=Magnaporthe oryzae (strain P131) GN=OOW_P131scaffold00215g6 PE=4 SV=1 - [L7JKS8_MAGOP]	16.17	1	5	5	13	439	439	46.8605	5.30029
G4NAZ1	Endoglucanase cel12A OS=Magnaporthe oryzae (strain 70-15 / ATCC MYA-4617 / FGSC 8958) GN=cel12A PE=1 SV=1 - [CE12A_MAGO7]	12.45	1	2	2	9	257	257	28.3685	7.94287
G4N641	Uncharacterized protein OS=Magnaporthe oryzae (strain 70-15 / ATCC MYA-4617 / FGSC 8958) GN=MGG_08563 PE=4 SV=1 - [G4N641_MAGO7]	35.09	1	4	4	8	228	228	24.8321	5.5415
G4N9H6	Uncharacterized protein OS=Magnaporthe oryzae (strain 70-15 / ATCC MYA-4617 / FGSC 8958) GN=MGG_17123 PE=4 SV=1 - [G4N9H6_MAGO7]	17.11	2	5	5	16	298	298	31.4713	6.29053
G4MSD2	60S ribosomal protein L35 OS=Magnaporthe oryzae (strain 70-15 / ATCC MYA-4617 / FGSC 8958) GN=MGG_04455 PE=3 SV=1 - [G4MSD2_MAGO7]	23.2	1	4	4	28	125	125	14.7804	10.8433
G4MPT0	Uncharacterized protein OS=Magnaporthe oryzae (strain 70-15 / ATCC MYA-4617 / FGSC 8958) GN=MGG_09219 PE=4 SV=1 - [G4MPT0_MAGO7]	26.13	1	4	4	15	310	310	31.8629	8.1626
G5EHY5	Fructose-bisphosphate aldolase OS=Magnaporthe oryzae (strain 70-15 / ATCC MYA-4617 / FGSC 8958) GN=MGCH7_ch7g899 PE=4 SV=1 - [G5EHY5_MAGO7]	26.48	2	7	7	17	287	287	31.3475	5.09717
G4NE64	Uncharacterized protein OS=Magnaporthe oryzae (strain P131) GN=OOW_P131scaffold00525g16 PE=4 SV=1 - [L7JA62_MAGOP]	14.6	1	5	5	18	404	404	42.4488	8.1333
G4NB99	Uncharacterized protein OS=Magnaporthe oryzae (strain 70-15 / ATCC MYA-4617 / FGSC 8958) GN=MGG_00594 PE=4 SV=1 - [G4NB99_MAGO7]	7.25	1	12	12	20	2056	2056	228.987	5.35107
G4N4Z6	Epoxide hydrolase 2 OS=Magnaporthe oryzae (strain 70-15 / ATCC MYA-4617 / FGSC 8958) GN=MGG_05175 PE=4 SV=1 - [G4N4Z6_MAGO7]	24.32	1	6	6	19	366	366	40.5056	5.56689
G4MWZ0	Uncharacterized protein OS=Magnaporthe oryzae (strain 70-15 / ATCC MYA-4617 / FGSC 8958) GN=MGG_11270 PE=4 SV=1 - [G4MWZ0_MAGO7]	17.88	2	10	10	17	632	632	68.0488	6.96143
G4MNR9	Branched-chain-amino-acid aminotransferase 1 OS=Magnaporthe oryzae (strain P131) GN=OOW_P131scaffold00979g6 PE=4 SV=1 - [L7J7M4_MAGOP]	17.62	1	5	5	13	386	386	41.9122	6.23975
G4N3V1	Fatty acid transporter OS=Magnaporthe oryzae (strain 70-15 / ATCC MYA-4617 / FGSC 8958) GN=MGG_05025 PE=4 SV=1 - [G4N3V1_MAGO7]	17.43	1	9	9	19	631	631	70.8141	8.25049
G4MUS0	Eukaryotic translation initiation factor 6 OS=Magnaporthe oryzae (strain 70-15 / ATCC MYA-4617 / FGSC 8958) GN=TIF6 PE=3 SV=1 - [G4MUS0_MAGO7]	6.91	2	1	1	7	246	246	26.5325	4.70361
G4N0M6	ATP-dependent (S)-NAD(P)H-hydrate dehydratase OS=Magnaporthe oryzae (strain 70-15 / ATCC MYA-4617 / FGSC 8958) GN=MGG_13834 PE=3 SV=1 - [G4N0M6_MAGO7]	14.25	3	3	3	3	351	351	37.0478	6.32861
G4MUY2	Uncharacterized protein OS=Magnaporthe oryzae (strain 70-15 / ATCC MYA-4617 / FGSC 8958) GN=MGG_07295 PE=4 SV=1 - [G4MUY2_MAGO7]	13.42	1	4	4	12	380	380	42.8904	9.83252
G4N3R7	Uncharacterized protein OS=Magnaporthe oryzae (strain 70-15 / ATCC MYA-4617 / FGSC 8958) GN=MGG_16711 PE=4 SV=1 - [G4N3R7_MAGO7]	8.26	2	8	8	17	1102	1102	121.316	4.76709
G4MMB9	T-complex protein 1 subunit beta OS=Magnaporthe oryzae (strain 70-15 / ATCC MYA-4617 / FGSC 8958) GN=MGG_01979 PE=3 SV=1 - [G4MMB9_MAGO7]	14.34	1	5	5	9	530	530	57.019	5.96045
G4NDN0	26S protease regulatory subunit 6B OS=Magnaporthe oryzae (strain 70-15 / ATCC MYA-4617 / FGSC 8958) GN=MGG_00908 PE=3 SV=1 - [G4NDN0_MAGO7]	17.58	2	6	7	21	421	421	46.9614	5.42725
G4N574	Translation initiation factor eIF-2B subunit alpha OS=Magnaporthe oryzae (strain 70-15 / ATCC MYA-4617 / FGSC 8958) GN=MGG_06077 PE=3 SV=1 - [G4N574_MAGO7]	22.12	2	7	7	12	339	339	36.9261	5.75732
P0CT07	Eukaryotic translation initiation factor 3 subunit K OS=Magnaporthe oryzae (strain Y34) GN=OOU_Y34scaffold00487g12 PE=2 SV=1 - [EIF3K_MAGOY]	35.59	1	6	6	10	236	236	26.9497	4.69092
G4N2C1	Porphobilinogen deaminase OS=Magnaporthe oryzae (strain 70-15 / ATCC MYA-4617 / FGSC 8958) GN=MGG_04860 PE=4 SV=1 - [G4N2C1_MAGO7]	21.76	1	7	7	22	340	340	36.834	6.45557
G4N7V1	Monothiol glutaredoxin-5 OS=Magnaporthe oryzae (strain 70-15 / ATCC MYA-4617 / FGSC 8958) GN=MGG_06356 PE=4 SV=1 - [G4N7V1_MAGO7]	25.1	2	4	4	7	259	259	27.8449	4.70361
G4N710	Uncharacterized protein OS=Magnaporthe oryzae (strain 70-15 / ATCC MYA-4617 / FGSC 8958) GN=MGG_17054 PE=4 SV=1 - [G4N710_MAGO7]	6.52	2	5	5	12	828	828	92.8122	9.26123
G4MPY2	Uncharacterized protein OS=Magnaporthe oryzae (strain 70-15 / ATCC MYA-4617 / FGSC 8958) GN=MGG_13177 PE=4 SV=1 - [G4MPY2_MAGO7]	17.19	2	3	3	21	256	256	26.0037	7.84033
G4MKM2	6-phosphogluconate dehydrogenase OS=Magnaporthe oryzae (strain 70-15 / ATCC MYA-4617 / FGSC 8958) GN=MGG_04398 PE=4 SV=1 - [G4MKM2_MAGO7]	32.73	1	8	8	19	333	333	34.7228	7.81104
G4MQN9	Phosphotransferase OS=Magnaporthe oryzae (strain P131) GN=OOW_P131scaffold01069g15 PE=3 SV=1 - [L7J2Q3_MAGOP]	20.55	3	10	10	30	477	477	53.2798	5.13525
G4NDM9	Superoxide dismutase OS=Magnaporthe oryzae (strain P131) GN=OOW_P131scaffold00414g3 PE=3 SV=1 - [L7JEF0_MAGOP]	27.31	1	4	4	13	227	227	24.6345	9.0708
A4R5F6	Arginine biosynthesis bifunctional protein ArgJ, mitochondrial OS=Magnaporthe oryzae (strain 70-15 / ATCC MYA-4617 / FGSC 8958) GN=MGG_04210 PE=3 SV=2 - [ARGJ_MAGO7]	16.38	1	6	6	11	464	464	48.924	7.04932
G4N4V5	Protein YIP OS=Magnaporthe oryzae (strain 70-15 / ATCC MYA-4617 / FGSC 8958) GN=MGG_06025 PE=3 SV=1 - [G4N4V5_MAGO7]	7.57	2	2	2	7	317	317	34.1022	4.66553
G4MV18	Uncharacterized protein OS=Magnaporthe oryzae (strain P131) GN=OOW_P131scaffold00535g9 PE=4 SV=1 - [L7JAA6_MAGOP]	24.03	1	7	7	33	233	233	25.9588	10.1108
G4N9S6	ADP-ribosylation factor 6 OS=Magnaporthe oryzae (strain 70-15 / ATCC MYA-4617 / FGSC 8958) GN=MGG_10676 PE=3 SV=1 - [G4N9S6_MAGO7]	10.75	1	2	3	15	186	186	20.902	9.34912
G4NB58	CGI-14-like protein OS=Magnaporthe oryzae PE=2 SV=1 - [D4NXH3_MAGOR]	5.12	2	2	2	7	449	449	48.2364	5.63037
A4QTY2	Metacaspase-1 OS=Magnaporthe oryzae (strain 70-15 / ATCC MYA-4617 / FGSC 8958) GN=MCA1 PE=3 SV=2 - [MCA1_MAGO7]	11.36	1	4	4	12	396	396	43.5036	5.16064
A4RE85	Probable lysosomal cobalamin transporter OS=Magnaporthe oryzae (strain 70-15 / ATCC MYA-4617 / FGSC 8958) GN=MGG_00740 PE=3 SV=1 - [LMBD1_MAGO7]	13.82	1	7	7	31	586	586	64.845	7.37158
G4MZF6	Phenylalanyl-tRNA synthetase alpha chain OS=Magnaporthe oryzae (strain P131) GN=OOW_P131scaffold01166g23 PE=4 SV=1 - [L7J0D6_MAGOP]	20.66	1	8	8	25	518	518	57.8904	5.99854
G4MMG8	NADPH-dependent 1-acyldihydroxyacetone phosphate reductase OS=Magnaporthe oryzae (strain P131) GN=OOW_P131scaffold01187g4 PE=3 SV=1 - [L7IZL5_MAGOP]	23.84	1	6	6	17	302	302	33.6597	9.5835
G4MU97	6-phosphogluconolactonase OS=Magnaporthe oryzae (strain 70-15 / ATCC MYA-4617 / FGSC 8958) GN=MGG_10148 PE=4 SV=1 - [G4MU97_MAGO7]	34.75	1	7	7	23	259	259	28.1835	5.49072
G4NAY2	Cyclin-dependent kinases regulatory subunit OS=Magnaporthe oryzae (strain P131) GN=OOW_P131scaffold01213g4 PE=3 SV=1 - [L7IYB8_MAGOP]	38.53	2	4	4	12	109	109	13.1824	5.50342
A4QYQ5	Probable dipeptidyl-aminopeptidase B OS=Magnaporthe oryzae (strain 70-15 / ATCC MYA-4617 / FGSC 8958) GN=DAPB PE=3 SV=1 - [DAPB_MAGO7]	15.67	2	13	13	17	938	938	105.216	6.20166
G4ML70	ATP-binding cassette sub-family D member 1 OS=Magnaporthe oryzae (strain P131) GN=OOW_P131scaffold00949g6 PE=4 SV=1 - [L7J887_MAGOP]	14.93	1	10	10	18	737	737	82.5865	9.18799
G4NDU4	Uncharacterized protein OS=Magnaporthe oryzae (strain 70-15 / ATCC MYA-4617 / FGSC 8958) GN=MGG_00204 PE=4 SV=1 - [G4NDU4_MAGO7]	16.31	4	8	9	21	515	515	56.6551	8.52881
G4N186	Ubiquitin C-terminal hydrolase OS=Magnaporthe oryzae (strain 70-15 / ATCC MYA-4617 / FGSC 8958) GN=MGG_07468 PE=3 SV=1 - [G4N186_MAGO7]	10.89	2	11	11	18	1175	1175	135.23	5.42725
G4NBV8	Acid phosphatase PHO1 OS=Magnaporthe oryzae (strain 70-15 / ATCC MYA-4617 / FGSC 8958) GN=MGG_10799 PE=3 SV=1 - [G4NBV8_MAGO7]	17.84	1	6	6	16	527	527	57.5455	6.12549
G4MP15	Glutathione S-transferase I OS=Magnaporthe oryzae (strain 70-15 / ATCC MYA-4617 / FGSC 8958) GN=MGG_05677 PE=4 SV=1 - [G4MP15_MAGO7]	21.75	4	5	5	18	285	285	32.1256	7.18115
G4MK83	Branched-chain-amino-acid aminotransferase OS=Magnaporthe oryzae (strain 70-15 / ATCC MYA-4617 / FGSC 8958) GN=MGG_02489 PE=3 SV=1 - [G4MK83_MAGO7]	25.74	1	8	8	14	404	404	45.0158	8.36768
G4MTG6	Calcium-binding protein NCS-1 OS=Magnaporthe oryzae (strain 70-15 / ATCC MYA-4617 / FGSC 8958) GN=MGG_01550 PE=4 SV=1 - [G4MTG6_MAGO7]	23.16	2	5	5	10	190	190	21.9948	4.94482
G4MXT6	Uncharacterized protein OS=Magnaporthe oryzae (strain 70-15 / ATCC MYA-4617 / FGSC 8958) GN=MGG_08253 PE=4 SV=1 - [G4MXT6_MAGO7]	19.48	1	3	3	8	154	154	16.2972	8.52881
G4NCJ4	Uncharacterized protein OS=Magnaporthe oryzae (strain 70-15 / ATCC MYA-4617 / FGSC 8958) GN=MGG_01064 PE=4 SV=1 - [G4NCJ4_MAGO7]	58.16	1	3	3	10	98	98	10.4895	4.53857
G4MV88	Transcription regulatory protein SWI3 OS=Magnaporthe oryzae (strain P131) GN=OOW_P131scaffold00570g19 PE=4 SV=1 - [L7J9D8_MAGOP]	15.06	1	8	8	15	704	704	76.2476	4.98291
G4MYL7	High mobility group protein OS=Magnaporthe oryzae (strain P131) GN=OOW_P131scaffold00178g15 PE=4 SV=1 - [L7JN04_MAGOP]	14.24	1	3	3	14	344	344	37.328	8.14795
G4MNH0	Ribosomal protein L38e OS=Magnaporthe oryzae (strain 70-15 / ATCC MYA-4617 / FGSC 8958) GN=MGG_06952 PE=3 SV=1 - [G4MNH0_MAGO7]	27.16	1	2	2	13	81	81	9.28918	10.1401
G4MPK2	ATP synthase subunit delta OS=Magnaporthe oryzae (strain 70-15 / ATCC MYA-4617 / FGSC 8958) GN=MGG_16459 PE=3 SV=1 - [G4MPK2_MAGO7]	9.15	1	1	1	3	164	164	17.5282	5.32568
G4MUY9	NADH-ubiquinone oxidoreductase 24 kDa subunit, mitochondrial OS=Magnaporthe oryzae (strain Y34) GN=OOU_Y34scaffold00768g29 PE=4 SV=1 - [L7HTU1_MAGOY]	28.46	2	7	7	13	253	253	27.7228	7.6499
G4MYA9	Transmembrane emp24 domain-containing protein 9 OS=Magnaporthe oryzae (strain P131) GN=OOW_P131scaffold00067g17 PE=3 SV=1 - [L7JRM9_MAGOP]	20.55	1	5	5	13	219	219	25.0255	6.43018
A4QVZ8	Lysophospholipase NTE1 OS=Magnaporthe oryzae (strain 70-15 / ATCC MYA-4617 / FGSC 8958) GN=NTE1 PE=3 SV=2 - [NTE1_MAGO7]	6.65	1	9	9	17	1503	1503	164.933	8.07471
G4MSN8	UDP-glucose 4-epimerase Gal10 OS=Magnaporthe oryzae (strain P131) GN=OOW_P131scaffold01192g26 PE=4 SV=1 - [L7IZE2_MAGOP]	9.68	1	1	1	6	155	155	17.2576	4.90674
G4N713	Uncharacterized protein OS=Magnaporthe oryzae (strain 70-15 / ATCC MYA-4617 / FGSC 8958) GN=MGG_03644 PE=4 SV=1 - [G4N713_MAGO7]	15.97	1	2	2	6	144	144	15.067	11.3413
G4NA86	Uncharacterized protein OS=Magnaporthe oryzae (strain 70-15 / ATCC MYA-4617 / FGSC 8958) GN=MGG_08455 PE=4 SV=1 - [G4NA86_MAGO7]	13.47	1	4	4	11	386	386	41.2043	6.7124
G4NFG0	Secretory lipase family protein OS=Magnaporthe oryzae (strain P131) GN=OOW_P131scaffold01255g4 PE=4 SV=1 - [L7IZL7_MAGOP]	23.09	2	8	8	33	446	446	48.3824	5.46533
Q2KFQ8	Putative uncharacterized protein OS=Magnaporthe oryzae (strain 70-15 / ATCC MYA-4617 / FGSC 8958) GN=MGCH7_ch7g627 PE=4 SV=1 - [Q2KFQ8_MAGO7]	11.23	10	6	6	10	775	775	84.6426	6.72705
G4MNP2	Uncharacterized protein OS=Magnaporthe oryzae (strain 70-15 / ATCC MYA-4617 / FGSC 8958) GN=MGG_02101 PE=4 SV=1 - [G4MNP2_MAGO7]	28.87	1	7	7	13	284	284	31.182	5.13525
G4NLE3	Uncharacterized protein OS=Magnaporthe oryzae (strain P131) GN=OOW_P131scaffold00952g14 PE=4 SV=1 - [L7J665_MAGOP]	36.99	3	6	6	13	146	146	15.6577	6.55127
G4NB24	Uncharacterized protein OS=Magnaporthe oryzae (strain 70-15 / ATCC MYA-4617 / FGSC 8958) GN=MGG_00647 PE=4 SV=1 - [G4NB24_MAGO7]	19.11	3	7	7	17	497	497	54.3882	8.104
G5EI51	Ethanolaminephosphotransferase OS=Magnaporthe oryzae (strain 70-15 / ATCC MYA-4617 / FGSC 8958) GN=MGCH7_ch7g358 PE=3 SV=1 - [G5EI51_MAGO7]	7.56	2	4	4	14	410	410	45.8938	6.78564
G4MUR7	Transcriptional repressor rco-1 OS=Magnaporthe oryzae (strain P131) GN=OOW_P131scaffold00195g40 PE=4 SV=1 - [L7JLY0_MAGOP]	19.77	1	11	11	23	607	607	65.7164	6.87354
Q2KES6	Beta-glucosidase OS=Magnaporthe oryzae (strain 70-15 / ATCC MYA-4617 / FGSC 8958) GN=MGCH7_ch7g960 PE=3 SV=1 - [Q2KES6_MAGO7]	10.97	2	9	9	12	921	921	100.073	5.89697
G4N987	T-complex protein 1 subunit eta OS=Magnaporthe oryzae (strain P131) GN=OOW_P131scaffold00459g9 PE=3 SV=1 - [L7JBX2_MAGOP]	17.03	1	8	8	15	558	558	60.6086	6.80029
Q2KEQ7	Alpha-amylase OS=Magnaporthe oryzae (strain P131) GN=OOW_P131scaffold01172g3 PE=3 SV=1 - [L7J063_MAGOP]	20.83	2	8	8	13	600	600	64.9709	7.26904
G4N4P6	Peroxisomal 2,4-dienoyl-CoA reductase SPS19 OS=Magnaporthe oryzae (strain P131) GN=OOW_P131scaffold00982g20 PE=4 SV=1 - [L7J5E6_MAGOP]	23	1	6	6	13	313	313	32.5628	8.6167
G4N8W1	40S ribosomal protein S20 OS=Magnaporthe oryzae (strain 70-15 / ATCC MYA-4617 / FGSC 8958) GN=MGG_03372 PE=3 SV=1 - [G4N8W1_MAGO7]	32.76	1	4	4	20	116	116	13.0981	9.5249
G4N1E7	Vacuolar protein sorting-associated protein 1 OS=Magnaporthe oryzae (strain P131) GN=OOW_P131scaffold00321g6 PE=3 SV=1 - [L7JGW4_MAGOP]	11.17	1	6	7	11	698	698	77.0973	8.39697
Q2KGF5	ATP-dependent 6-phosphofructokinase OS=Magnaporthe oryzae (strain 70-15 / ATCC MYA-4617 / FGSC 8958) GN=MGCH7_ch7g380 PE=3 SV=1 - [Q2KGF5_MAGO7]	8.18	3	4	11	18	1442	1442	157.394	6.97607
G4N4X7	Protein YIP OS=Magnaporthe oryzae (strain 70-15 / ATCC MYA-4617 / FGSC 8958) GN=MGG_06045 PE=3 SV=1 - [G4N4X7_MAGO7]	6.76	1	2	2	7	281	281	30.5137	5.05908
G4MKN9	T-complex protein 1 subunit gamma OS=Magnaporthe oryzae (strain P131) GN=OOW_P131scaffold00343g25 PE=3 SV=1 - [L7JGP5_MAGOP]	20.89	1	10	10	17	541	541	59.3989	6.26514
G4NGW9	Vacuolar protein 8 OS=Magnaporthe oryzae (strain 70-15 / ATCC MYA-4617 / FGSC 8958) GN=MGG_04004 PE=4 SV=1 - [G4NGW9_MAGO7]	18.25	3	8	8	12	559	559	60.1039	4.89404
Q2KFD3	Putative uncharacterized protein OS=Magnaporthe oryzae (strain 70-15 / ATCC MYA-4617 / FGSC 8958) GN=MGCH7_ch7g753 PE=4 SV=1 - [Q2KFD3_MAGO7]	30.82	2	5	5	13	159	159	18.077	5.35107
G4MLE5	Microtubule integrity protein mal3 OS=Magnaporthe oryzae (strain Y34) GN=OOU_Y34scaffold00702g3 PE=4 SV=1 - [L7HX49_MAGOY]	28.99	3	5	5	15	238	238	25.9051	5.05908
G4MZ29	Uncharacterized protein OS=Magnaporthe oryzae (strain P131) GN=OOW_P131scaffold00507g17 PE=4 SV=1 - [L7JAT8_MAGOP]	24.68	2	4	4	19	158	158	17.8158	7.06396
G4NG44	Bifunctional P-450:NADPH-P450 reductase OS=Magnaporthe oryzae (strain 70-15 / ATCC MYA-4617 / FGSC 8958) GN=MGG_10879 PE=4 SV=1 - [G4NG44_MAGO7]	12.4	4	10	10	11	1089	1089	120.185	5.65576
G4MUW4	Uncharacterized protein OS=Magnaporthe oryzae (strain 70-15 / ATCC MYA-4617 / FGSC 8958) GN=MGG_01706 PE=4 SV=1 - [G4MUW4_MAGO7]	48.68	2	4	4	12	76	76	7.97502	9.31982
G4MYG4	Uncharacterized protein OS=Magnaporthe oryzae (strain 70-15 / ATCC MYA-4617 / FGSC 8958) GN=MGG_10487 PE=4 SV=1 - [G4MYG4_MAGO7]	10.64	1	4	4	9	357	357	39.8893	9.15869
G4N816	Uncharacterized protein OS=Magnaporthe oryzae (strain 70-15 / ATCC MYA-4617 / FGSC 8958) GN=MGG_03486 PE=4 SV=1 - [G4N816_MAGO7]	40.34	1	4	4	16	119	119	13.745	9.64209
G4MPB8	Deoxyhypusine synthase OS=Magnaporthe oryzae (strain 70-15 / ATCC MYA-4617 / FGSC 8958) GN=MGG_09173 PE=4 SV=1 - [G4MPB8_MAGO7]	14.84	1	5	5	12	364	364	39.917	5.99854
G4ND09	Actin-related protein 2/3 complex subunit 3 OS=Magnaporthe oryzae (strain P131) GN=OOW_P131scaffold00495g3 PE=3 SV=1 - [L7JB63_MAGOP]	32.29	1	6	6	15	192	192	21.7261	6.75635
G4MUN8	Beta-glucosidase A OS=Magnaporthe oryzae (strain P131) GN=OOW_P131scaffold00195g10 PE=3 SV=1 - [L7JLV2_MAGOP]	17.86	2	8	8	12	476	476	54.2008	5.23682
G4NHT3	Uncharacterized protein OS=Magnaporthe oryzae (strain 70-15 / ATCC MYA-4617 / FGSC 8958) GN=MGG_09445 PE=4 SV=1 - [G4NHT3_MAGO7]	20.08	1	6	6	10	478	478	52.1994	5.19873
G4MNH6	Dienelactone hydrolase OS=Magnaporthe oryzae (strain 70-15 / ATCC MYA-4617 / FGSC 8958) GN=MGG_06957 PE=4 SV=1 - [G4MNH6_MAGO7]	32.51	2	4	4	6	283	283	31.3147	6.31592
G4NG70	Prolyl-tRNA synthetase 2 OS=Magnaporthe oryzae (strain P131) GN=OOW_P131scaffold00051g7 PE=3 SV=1 - [L7JR25_MAGOP]	23.14	1	11	11	23	566	566	63.3334	7.03467
G4MPV4	Squalene synthetase OS=Magnaporthe oryzae (strain P131) GN=OOW_P131scaffold00417g18 PE=4 SV=1 - [L7JF74_MAGOP]	25.38	1	10	10	24	465	465	53.603	5.69385
G4MXL7	Ran GTPase-activating protein 1 OS=Magnaporthe oryzae (strain 70-15 / ATCC MYA-4617 / FGSC 8958) GN=MGG_01248 PE=4 SV=1 - [G4MXL7_MAGO7]	23.99	1	9	9	22	421	421	46.3669	4.85596
G4N1N7	NADH-ubiquinone oxidoreductase OS=Magnaporthe oryzae PE=2 SV=1 - [D4NXI7_MAGOR]	34.9	1	5	5	11	192	192	20.4284	7.48877
G4N703	Uncharacterized protein OS=Magnaporthe oryzae (strain 70-15 / ATCC MYA-4617 / FGSC 8958) GN=MGG_12828 PE=4 SV=1 - [G4N703_MAGO7]	7.2	2	3	3	6	639	639	69.6346	6.59521
G4MRG8	Uncharacterized protein OS=Magnaporthe oryzae (strain 70-15 / ATCC MYA-4617 / FGSC 8958) GN=MGG_02420 PE=4 SV=1 - [G4MRG8_MAGO7]	20.32	2	9	9	26	507	507	57.0697	6.41748
G4NAA5	26S proteasome non-ATPase regulatory subunit 11 OS=Magnaporthe oryzae (strain 70-15 / ATCC MYA-4617 / FGSC 8958) GN=MGG_03211 PE=4 SV=1 - [G4NAA5_MAGO7]	25.3	1	9	9	27	423	423	47.3945	6.32861
G4MKQ4	Tubulin alpha chain OS=Magnaporthe oryzae (strain 70-15 / ATCC MYA-4617 / FGSC 8958) GN=MGG_06650 PE=3 SV=1 - [G4MKQ4_MAGO7]	14.67	1	6	6	20	450	450	50.0363	5.09717
Q2KEJ5	Uncharacterized protein OS=Magnaporthe oryzae (strain 70-15 / ATCC MYA-4617 / FGSC 8958) GN=MGCH7_ch7g1041 PE=4 SV=1 - [Q2KEJ5_MAGO7]	23.23	2	4	4	15	254	254	27.1601	6.16357
G4NHF5	Vacuolar import and degradation protein 27 OS=Magnaporthe oryzae (strain 70-15 / ATCC MYA-4617 / FGSC 8958) GN=MGG_03859 PE=4 SV=1 - [G4NHF5_MAGO7]	6.92	2	6	6	14	838	838	93.6908	4.93213
G5EHT4	Trans-2-enoyl-CoA reductase OS=Magnaporthe oryzae (strain 70-15 / ATCC MYA-4617 / FGSC 8958) GN=MGCH7_ch7g279 PE=4 SV=1 - [G5EHT4_MAGO7]	18.46	1	8	8	14	428	428	46.3239	9.5542
G4NDC9	Endoplasmic reticulum-Golgi intermediate compartment protein 2 OS=Magnaporthe oryzae (strain P131) GN=OOW_P131scaffold01094g15 PE=4 SV=1 - [L7J3Y8_MAGOP]	19.95	1	5	5	14	376	376	42.0518	6.48096
G4MU89	FACT complex subunit pob-3 OS=Magnaporthe oryzae (strain 70-15 / ATCC MYA-4617 / FGSC 8958) GN=MGG_14751 PE=4 SV=1 - [G4MU89_MAGO7]	10.61	2	5	5	14	556	556	62.4315	4.89404
G4N5Z2	Spliceosome component OS=Magnaporthe oryzae (strain P131) GN=OOW_P131scaffold01296g6 PE=4 SV=1 - [L7IYG9_MAGOP]	12.35	1	4	4	12	494	494	51.7376	5.31299
G4NBF7	Acid phosphatase OS=Magnaporthe oryzae (strain 70-15 / ATCC MYA-4617 / FGSC 8958) GN=MGG_00552 PE=4 SV=1 - [G4NBF7_MAGO7]	22.25	2	8	8	19	463	463	50.7322	6.34131
G4NBY8	Uncharacterized protein OS=Magnaporthe oryzae (strain 70-15 / ATCC MYA-4617 / FGSC 8958) GN=MGG_01149 PE=4 SV=1 - [G4NBY8_MAGO7]	29.73	1	3	3	5	148	148	14.7993	5.24951
G4MX86	Uncharacterized protein OS=Magnaporthe oryzae (strain 70-15 / ATCC MYA-4617 / FGSC 8958) GN=MGG_08291 PE=4 SV=1 - [G4MX86_MAGO7]	10.46	1	1	1	7	153	153	15.9476	6.06201
G4N127	Uncharacterized protein OS=Magnaporthe oryzae (strain 70-15 / ATCC MYA-4617 / FGSC 8958) GN=MGG_07792 PE=4 SV=1 - [G4N127_MAGO7]	25	1	6	6	17	384	384	41.4668	6.21436
G4N6E8	Dibasic-processing endoprotease OS=Magnaporthe oryzae (strain P131) GN=OOW_P131scaffold00378g4 PE=4 SV=1 - [L7JG72_MAGOP]	8.8	1	8	8	25	852	852	92.8317	5.77002
G4N2R8	Histone H1-binding protein OS=Magnaporthe oryzae (strain P131) GN=OOW_P131scaffold00314g34 PE=4 SV=1 - [L7JGX4_MAGOP]	14.07	1	6	6	10	533	533	56.1832	4.57666
G4N4I9	RNase III domain-containing protein OS=Magnaporthe oryzae (strain P131) GN=OOW_P131scaffold01322g25 PE=4 SV=1 - [L7IXI8_MAGOP]	29.1	2	7	7	17	244	244	27.6711	9.83252
A0A151V4S7	Uncharacterized protein OS=Magnaporthe oryzae (strain 70-15 / ATCC MYA-4617 / FGSC 8958) GN=MGG_10087 PE=4 SV=1 - [A0A151V4S7_MAGO7]	14.96	2	6	6	15	448	448	48.3471	9.36377
P0CT12	Histone H2A OS=Magnaporthe oryzae (strain 70-15 / ATCC MYA-4617 / FGSC 8958) GN=HTA1 PE=3 SV=1 - [H2A_MAGO7]	16.91	1	2	3	18	136	136	14.2918	10.5503
G4NKD6	NAD-dependent deacetylase sirtuin-5 OS=Magnaporthe oryzae (strain P131) GN=OOW_P131scaffold00516g17 PE=4 SV=1 - [L7JAG4_MAGOP]	22.97	3	5	5	10	357	357	38.2156	5.19873
G4MTN5	Uncharacterized protein OS=Magnaporthe oryzae (strain 70-15 / ATCC MYA-4617 / FGSC 8958) GN=MGG_07194 PE=4 SV=1 - [G4MTN5_MAGO7]	12.36	1	3	3	6	267	267	27.682	9.46631
G4N0M9	Uncharacterized protein OS=Magnaporthe oryzae (strain P131) GN=OOW_P131scaffold01278g17 PE=4 SV=1 - [L7IX91_MAGOP]	11.22	1	3	3	11	205	205	20.4815	10.9604
G4NDS9	Phosphatidylinositol transfer protein CSR1 OS=Magnaporthe oryzae (strain P131) GN=OOW_P131scaffold00345g20 PE=4 SV=1 - [L7JFA8_MAGOP]	12.73	2	6	6	16	479	479	54.4166	6.82959
G4MRX7	Vacuolar amino acid transporter 3 OS=Magnaporthe oryzae (strain 70-15 / ATCC MYA-4617 / FGSC 8958) GN=MGG_02464 PE=4 SV=1 - [G4MRX7_MAGO7]	4.56	2	3	3	11	768	768	83.3367	7.1665
A4QW40	Transcription initiation factor IIA subunit 2 OS=Magnaporthe oryzae (strain 70-15 / ATCC MYA-4617 / FGSC 8958) GN=TOA2 PE=3 SV=1 - [T2AG_MAGO7]	26.72	1	4	4	15	116	116	13.2269	8.26514
G5EHB6	Uncharacterized protein OS=Magnaporthe oryzae (strain 70-15 / ATCC MYA-4617 / FGSC 8958) GN=MGCH7_ch7g262 PE=4 SV=1 - [G5EHB6_MAGO7]	26.19	1	3	3	14	126	126	14.171	5.50342
G4N1Q6	Uncharacterized protein OS=Magnaporthe oryzae (strain 70-15 / ATCC MYA-4617 / FGSC 8958) GN=MGG_07522 PE=4 SV=1 - [G4N1Q6_MAGO7]	16.48	2	7	7	13	619	619	69.2418	7.95752
G4MR35	Prohibitin-2 OS=Magnaporthe oryzae (strain P131) GN=OOW_P131scaffold01201g43 PE=4 SV=1 - [L7IYX7_MAGOP]	16.83	1	5	5	19	303	303	33.3537	9.71533
G4N0M0	Uncharacterized protein OS=Magnaporthe oryzae (strain Y34) GN=OOU_Y34scaffold00054g11 PE=3 SV=1 - [L7INF0_MAGOY]	40.15	2	5	5	24	132	132	14.1151	6.771
G4NHN3	Uncharacterized protein OS=Magnaporthe oryzae (strain 70-15 / ATCC MYA-4617 / FGSC 8958) GN=MGG_03781 PE=4 SV=1 - [G4NHN3_MAGO7]	39.29	3	3	3	22	140	140	16.239	5.87158
G4NIL7	Uncharacterized protein OS=Magnaporthe oryzae (strain 70-15 / ATCC MYA-4617 / FGSC 8958) GN=MGG_09798 PE=4 SV=1 - [G4NIL7_MAGO7]	11.8	1	6	6	10	627	627	68.219	5.57959
G4NEA1	Uncharacterized protein OS=Magnaporthe oryzae (strain 70-15 / ATCC MYA-4617 / FGSC 8958) GN=MGG_00815 PE=4 SV=1 - [G4NEA1_MAGO7]	15.92	2	3	3	6	245	245	24.339	5.56689
G5EHP5	Uncharacterized protein OS=Magnaporthe oryzae (strain 70-15 / ATCC MYA-4617 / FGSC 8958) GN=MGCH7_ch7g577 PE=4 SV=1 - [G5EHP5_MAGO7]	20.99	1	1	1	8	81	81	9.19468	8.86572
G4MLK2	SUMO-activating enzyme subunit uba-2 OS=Magnaporthe oryzae (strain 70-15 / ATCC MYA-4617 / FGSC 8958) GN=MGG_06733 PE=4 SV=1 - [G4MLK2_MAGO7]	7.75	14	5	5	13	684	684	75.1945	5.64307
G4MP06	Uncharacterized protein OS=Magnaporthe oryzae (strain 70-15 / ATCC MYA-4617 / FGSC 8958) GN=MGG_05668 PE=4 SV=1 - [G4MP06_MAGO7]	10	1	1	1	4	170	170	18.6894	8.96826
G4N4Y5	Oxidoreductase OS=Magnaporthe oryzae (strain 70-15 / ATCC MYA-4617 / FGSC 8958) GN=MGG_13230 PE=4 SV=1 - [G4N4Y5_MAGO7]	28.53	2	9	9	20	368	368	39.757	8.73389
A4RMB1	Exportin-T OS=Magnaporthe oryzae (strain 70-15 / ATCC MYA-4617 / FGSC 8958) GN=LOS1 PE=3 SV=2 - [XPOT_MAGO7]	9.06	2	8	8	16	1027	1027	114.746	5.16064
G4N180	Dihydrodipicolinate synthase OS=Magnaporthe oryzae (strain 70-15 / ATCC MYA-4617 / FGSC 8958) GN=MGG_07462 PE=3 SV=1 - [G4N180_MAGO7]	24.77	1	7	7	22	323	323	34.1244	6.55127
G4MSP7	Vacuolar ATP synthase subunit D OS=Magnaporthe oryzae (strain P131) GN=OOW_P131scaffold01192g35 PE=4 SV=1 - [L7IZD0_MAGOP]	15.55	2	4	4	11	238	238	26.7429	7.34229
G4MWX0	Synaptojanin-1 OS=Magnaporthe oryzae (strain 70-15 / ATCC MYA-4617 / FGSC 8958) GN=MGG_11279 PE=4 SV=1 - [G4MWX0_MAGO7]	15.2	2	10	10	23	704	704	79.5126	9.33447
G4MQN0	DNA-directed RNA polymerases I and III subunit RPAC1 OS=Magnaporthe oryzae (strain P131) GN=OOW_P131scaffold01069g8 PE=4 SV=1 - [L7J3U7_MAGOP]	13.14	1	3	3	4	373	373	41.6131	6.55127
G4NCA0	Uncharacterized protein OS=Magnaporthe oryzae (strain 70-15 / ATCC MYA-4617 / FGSC 8958) GN=MGG_01101 PE=4 SV=1 - [G4NCA0_MAGO7]	9.86	2	6	6	19	852	852	91.8477	5.50342
G4MXA4	Uncharacterized protein OS=Magnaporthe oryzae (strain 70-15 / ATCC MYA-4617 / FGSC 8958) GN=MGG_12484 PE=4 SV=1 - [G4MXA4_MAGO7]	2.49	2	1	1	4	523	523	53.8542	5.12256
G4MQY5	Uncharacterized protein OS=Magnaporthe oryzae (strain P131) GN=OOW_P131scaffold01231g1 PE=4 SV=1 - [L7IY14_MAGOP]	11.95	3	7	7	19	619	619	69.6797	6.75635
G4MY82	Uncharacterized protein OS=Magnaporthe oryzae (strain 70-15 / ATCC MYA-4617 / FGSC 8958) GN=MGG_01297 PE=4 SV=1 - [G4MY82_MAGO7]	34.84	2	7	7	12	287	287	31.0115	6.7417
G4MXB4	Maltose permease MAL61 OS=Magnaporthe oryzae (strain 70-15 / ATCC MYA-4617 / FGSC 8958) GN=MGG_08266 PE=3 SV=1 - [G4MXB4_MAGO7]	11.86	1	6	6	8	565	565	62.6588	8.39697
G4MYU4	Uncharacterized protein OS=Magnaporthe oryzae (strain 70-15 / ATCC MYA-4617 / FGSC 8958) GN=MGG_12304 PE=4 SV=1 - [G4MYU4_MAGO7]	8.38	3	6	6	18	728	728	80.3238	7.31299
G4N5A2	SH3 domain-containing protein OS=Magnaporthe oryzae (strain 70-15 / ATCC MYA-4617 / FGSC 8958) GN=MGG_06101 PE=4 SV=1 - [G4N5A2_MAGO7]	3.02	1	2	2	5	596	596	62.6955	7.10791
G4N2W4	Surface protein 1 OS=Magnaporthe oryzae (strain 70-15 / ATCC MYA-4617 / FGSC 8958) GN=MGG_07973 PE=4 SV=1 - [G4N2W4_MAGO7]	27.4	1	3	3	10	146	146	15.3755	4.66553
G4NHF7	T-complex protein 1 subunit zeta OS=Magnaporthe oryzae (strain 70-15 / ATCC MYA-4617 / FGSC 8958) GN=MGG_03857 PE=3 SV=1 - [G4NHF7_MAGO7]	15.81	1	9	9	22	544	544	59.1791	6.87354
A4RBS3	ATP-dependent RNA helicase SUB2 OS=Magnaporthe oryzae (strain 70-15 / ATCC MYA-4617 / FGSC 8958) GN=SUB2 PE=3 SV=1 - [SUB2_MAGO7]	23.85	2	9	9	16	436	436	49.132	5.79541
G4N3M1	Transferase OS=Magnaporthe oryzae (strain 70-15 / ATCC MYA-4617 / FGSC 8958) GN=MGG_05825 PE=4 SV=1 - [G4N3M1_MAGO7]	8.81	1	3	3	6	579	579	62.1456	6.49365
G4NC38	Uncharacterized protein OS=Magnaporthe oryzae (strain 70-15 / ATCC MYA-4617 / FGSC 8958) GN=MGG_00443 PE=4 SV=1 - [G4NC38_MAGO7]	43.48	1	3	3	8	69	69	7.43554	5.05908
G4MM85	Uncharacterized protein OS=Magnaporthe oryzae (strain 70-15 / ATCC MYA-4617 / FGSC 8958) GN=MGG_13101 PE=4 SV=1 - [G4MM85_MAGO7]	20.17	2	3	3	8	238	238	25.4711	5.16064
G4MQC8	AP-1 complex subunit mu-1 OS=Magnaporthe oryzae (strain 70-15 / ATCC MYA-4617 / FGSC 8958) GN=MGG_10633 PE=3 SV=1 - [G4MQC8_MAGO7]	22.54	2	9	9	15	448	448	50.5811	6.96143
G4N2E1	Dienelactone hydrolase OS=Magnaporthe oryzae (strain 70-15 / ATCC MYA-4617 / FGSC 8958) GN=MGG_07910 PE=4 SV=1 - [G4N2E1_MAGO7]	31.3	1	5	5	10	262	262	28.0612	8.29443
G4N054	Phosphoinositide phospholipase C OS=Magnaporthe oryzae (strain P131) GN=OOW_P131scaffold00095g10 PE=4 SV=1 - [L7JQ85_MAGOP]	8.36	1	4	4	8	706	706	77.4299	5.97314
G4MUE8	Uncharacterized protein OS=Magnaporthe oryzae (strain P131) GN=OOW_P131scaffold01287g24 PE=4 SV=1 - [L7IX44_MAGOP]	13.72	1	4	4	11	401	401	41.4236	4.58936
G4N695	Putative chitinase OS=Magnaporthe oryzae GN=ChBD-8 PE=4 SV=1 - [C9K5U2_MAGOR]	10.05	1	4	4	19	428	428	46.3304	5.40186
G4MKQ7	Uncharacterized protein OS=Magnaporthe oryzae (strain 70-15 / ATCC MYA-4617 / FGSC 8958) GN=MGG_06653 PE=4 SV=1 - [G4MKQ7_MAGO7]	9.36	1	2	2	12	235	235	23.1513	9.21729
G4N6E2	Mannose-P-dolichol utilization defect 1 protein OS=Magnaporthe oryzae (strain 70-15 / ATCC MYA-4617 / FGSC 8958) GN=MGG_08600 PE=4 SV=1 - [G4N6E2_MAGO7]	29.63	1	7	7	21	270	270	28.4894	9.40771
G4N9E1	Glycerol kinase OS=Magnaporthe oryzae (strain 70-15 / ATCC MYA-4617 / FGSC 8958) GN=MGG_10005 PE=3 SV=1 - [G4N9E1_MAGO7]	13.76	2	6	6	10	516	516	55.8909	5.84619
G4MSU9	Riboflavin synthase alpha chain OS=Magnaporthe oryzae (strain P131) GN=OOW_P131scaffold01358g88 PE=4 SV=1 - [L7IU37_MAGOP]	20.56	1	4	4	10	214	214	22.8246	5.04639
G4N2H4	2-dehydropantoate 2-reductase OS=Magnaporthe oryzae (strain 70-15 / ATCC MYA-4617 / FGSC 8958) GN=MGG_07937 PE=3 SV=1 - [G4N2H4_MAGO7]	25.62	3	6	6	9	324	324	35.4672	6.80029
G4MZZ1	Uncharacterized protein OS=Magnaporthe oryzae (strain 70-15 / ATCC MYA-4617 / FGSC 8958) GN=MGG_06156 PE=4 SV=1 - [G4MZZ1_MAGO7]	1.36	2	1	1	4	881	881	94.11	6.11279
G5EHF6	NADH-ubiquinone oxidoreductase OS=Magnaporthe oryzae (strain 70-15 / ATCC MYA-4617 / FGSC 8958) GN=MGCH7_ch7g876 PE=3 SV=1 - [G5EHF6_MAGO7]	32.37	1	5	5	20	173	173	19.7829	8.29443
G4MUU6	Uncharacterized protein OS=Magnaporthe oryzae (strain 70-15 / ATCC MYA-4617 / FGSC 8958) GN=MGG_01692 PE=4 SV=1 - [G4MUU6_MAGO7]	7.23	2	2	2	7	401	401	40.9868	8.25049
G4NH74	Orotidine 5'-phosphate decarboxylase OS=Magnaporthe oryzae (strain 70-15 / ATCC MYA-4617 / FGSC 8958) GN=MGG_12098 PE=4 SV=1 - [G4NH74_MAGO7]	13.88	3	5	5	15	389	389	41.818	5.78271
G4MQA1	Uncharacterized protein OS=Magnaporthe oryzae (strain 70-15 / ATCC MYA-4617 / FGSC 8958) GN=MGG_09271 PE=4 SV=1 - [G4MQA1_MAGO7]	8.79	2	3	3	5	398	398	43.2333	8.54346
G4MY81	Uncharacterized protein OS=Magnaporthe oryzae (strain 70-15 / ATCC MYA-4617 / FGSC 8958) GN=MGG_01296 PE=4 SV=1 - [G4MY81_MAGO7]	9.6	1	4	4	8	594	594	66.0227	8.01611
G4MRU5	Pre-mRNA-processing factor 39 OS=Magnaporthe oryzae (strain 70-15 / ATCC MYA-4617 / FGSC 8958) GN=MGG_04558 PE=4 SV=1 - [G4MRU5_MAGO7]	15.7	2	8	8	13	586	586	68.0918	5.46533
G4MR75	Cytochrome P450 52A5 OS=Magnaporthe oryzae (strain 70-15 / ATCC MYA-4617 / FGSC 8958) GN=MGG_09920 PE=3 SV=1 - [G4MR75_MAGO7]	19.63	1	9	9	11	535	535	60.9144	7.7085
G4N048	Diacylglycerol O-acyltransferase 1 OS=Magnaporthe oryzae (strain P131) GN=OOW_P131scaffold00095g16 PE=3 SV=1 - [L7JR27_MAGOP]	7.95	2	4	4	13	503	503	56.0418	9.5249
G4MRL8	Oxysterol-binding protein OS=Magnaporthe oryzae (strain 70-15 / ATCC MYA-4617 / FGSC 8958) GN=MGG_09949 PE=3 SV=1 - [G4MRL8_MAGO7]	5.34	2	3	3	7	543	543	61.0285	5.97314
G4MYL6	Urease OS=Magnaporthe oryzae (strain 70-15 / ATCC MYA-4617 / FGSC 8958) GN=MGG_01324 PE=3 SV=1 - [G4MYL6_MAGO7]	9.58	1	5	5	7	835	835	90.3082	5.89697
G4N5D4	Pre-mRNA-processing-splicing factor 8 OS=Magnaporthe oryzae (strain 70-15 / ATCC MYA-4617 / FGSC 8958) GN=MGG_05244 PE=4 SV=1 - [G4N5D4_MAGO7]	6.95	1	14	14	15	2373	2373	274.54	8.70459
G5EGW2	V-type proton ATPase proteolipid subunit OS=Magnaporthe oryzae (strain 70-15 / ATCC MYA-4617 / FGSC 8958) GN=MGCH7_ch7g866 PE=3 SV=1 - [G5EGW2_MAGO7]	18.45	1	2	2	16	168	168	17.2011	5.98584
G4N5U9	Uncharacterized protein OS=Magnaporthe oryzae (strain 70-15 / ATCC MYA-4617 / FGSC 8958) GN=MGG_08535 PE=4 SV=1 - [G4N5U9_MAGO7]	16.47	1	3	3	15	170	170	18.4684	8.52881
G4MT14	Glycine rich protein OS=Magnaporthe oryzae (strain P131) GN=OOW_P131scaffold00219g13 PE=4 SV=1 - [L7JKH8_MAGOP]	14.05	1	2	2	8	121	121	13.3226	10.0962
G4N3F2	Superoxide dismutase OS=Magnaporthe oryzae (strain P131) GN=OOW_P131scaffold00183g5 PE=3 SV=1 - [L7JLR5_MAGOP]	24.88	1	5	5	8	213	213	23.3299	6.80029
G4NKL4	Uncharacterized protein OS=Magnaporthe oryzae (strain 70-15 / ATCC MYA-4617 / FGSC 8958) GN=MGG_03048 PE=4 SV=1 - [G4NKL4_MAGO7]	10.93	3	7	7	12	750	750	82.0786	7.03467
G4MS65	4-coumarate-CoA ligase OS=Magnaporthe oryzae (strain P131) GN=OOW_P131scaffold01138g39 PE=4 SV=1 - [L7J126_MAGOP]	18.85	1	9	9	15	557	557	61.0914	7.72314
G4N8H9	Mitochondrial metal transporter 2 OS=Magnaporthe oryzae (strain P131) GN=OOW_P131scaffold00027g8 PE=4 SV=1 - [L7JQJ0_MAGOP]	4.94	1	3	3	9	526	526	57.2587	8.93896
G4N9V1	E3 ubiquitin-protein ligase ptr1 + RNA transport protein 1 OS=Magnaporthe oryzae (strain P131) GN=OOW_P131scaffold01311g29 PE=4 SV=1 - [L7IW41_MAGOP]	2.5	3	9	9	16	4048	4048	449.665	5.18604
G4MUX2	Norsolorinic acid reductase OS=Magnaporthe oryzae (strain P131) GN=OOW_P131scaffold00570g12 PE=4 SV=1 - [L7J938_MAGOP]	21.37	1	7	7	14	379	379	42.0421	7.12256
G4N6J1	Uncharacterized protein OS=Magnaporthe oryzae (strain 70-15 / ATCC MYA-4617 / FGSC 8958) GN=MGG_03701 PE=4 SV=1 - [G4N6J1_MAGO7]	11.29	2	6	6	9	558	558	60.4733	8.93896
G4N5F1	Mitochondrial-processing peptidase subunit alpha OS=Magnaporthe oryzae (strain 70-15 / ATCC MYA-4617 / FGSC 8958) GN=MGG_05258 PE=3 SV=1 - [G4N5F1_MAGO7]	9.27	2	5	5	11	561	561	61.2551	6.80029
G4MTT2	Chloride channel protein 3 OS=Magnaporthe oryzae (strain 70-15 / ATCC MYA-4617 / FGSC 8958) GN=MGG_11357 PE=4 SV=1 - [G4MTT2_MAGO7]	7.04	3	6	6	7	909	909	100.137	6.81494
G4MV54	CaaX protease OS=Magnaporthe oryzae (strain P131) GN=OOW_P131scaffold00399g26 PE=4 SV=1 - [L7JEU4_MAGOP]	17.65	1	4	4	8	323	323	35.9153	9.40771
G4MYW0	Peroxisomal membrane protein 4 OS=Magnaporthe oryzae (strain P131) GN=OOW_P131scaffold00888g20 PE=4 SV=1 - [L7J732_MAGOP]	15.28	2	3	3	6	216	216	24.1509	10.228
G4MRX9	V-type proton ATPase proteolipid subunit OS=Magnaporthe oryzae (strain 70-15 / ATCC MYA-4617 / FGSC 8958) GN=MGG_02466 PE=3 SV=1 - [G4MRX9_MAGO7]	15.43	1	2	2	19	162	162	16.4618	6.44287
G4N259	Multidrug resistance-associated protein 6 OS=Magnaporthe oryzae (strain P131) GN=OOW_P131scaffold00961g7 PE=4 SV=1 - [L7J5W4_MAGOP]	4.33	1	6	6	14	1571	1571	174.23	6.48096
A4RM80	Enolase-phosphatase E1 OS=Magnaporthe oryzae (strain 70-15 / ATCC MYA-4617 / FGSC 8958) GN=UTR4 PE=3 SV=3 - [ENOPH_MAGO7]	28.57	2	7	7	16	231	231	25.3878	5.0083
G4MYI9	Glutaredoxin-C4 OS=Magnaporthe oryzae (strain Y34) GN=OOU_Y34scaffold00979g77 PE=4 SV=1 - [L7HQQ4_MAGOY]	19.29	1	4	4	8	280	280	30.5259	8.79248
G4MRH5	Kinesin OS=Magnaporthe oryzae (strain P131) GN=OOW_P131scaffold00615g1 PE=3 SV=1 - [L7J8D9_MAGOP]	0.87	2	1	1	3	1723	1723	191.701	5.2749
G4NDY8	1,3-beta-glucan synthase component FKS1 OS=Magnaporthe oryzae (strain 70-15 / ATCC MYA-4617 / FGSC 8958) GN=MGG_00865 PE=4 SV=1 - [G4NDY8_MAGO7]	8.98	1	14	14	26	1916	1916	218.653	8.104
G4N560	Uncharacterized protein OS=Magnaporthe oryzae (strain P131) GN=OOW_P131scaffold00270g6 PE=4 SV=1 - [L7JIF7_MAGOP]	11.11	1	5	5	16	603	603	61.4417	6.17627
G4NHG9	Glycosyl hydrolase family 43 protein OS=Magnaporthe oryzae (strain 70-15 / ATCC MYA-4617 / FGSC 8958) GN=MGG_03844 PE=3 SV=1 - [G4NHG9_MAGO7]	7.86	2	3	3	6	458	458	48.904	5.36377
G4NFT0	Interferon-induced GTP-binding protein Mx OS=Magnaporthe oryzae (strain P131) GN=OOW_P131scaffold00152g15 PE=3 SV=1 - [L7JPK5_MAGOP]	3.44	1	3	3	6	871	871	97.8674	7.34229
G4NAX8	Replication factor-A protein 1 OS=Magnaporthe oryzae (strain 70-15 / ATCC MYA-4617 / FGSC 8958) GN=MGG_00685 PE=4 SV=1 - [G4NAX8_MAGO7]	7.05	1	4	4	8	610	610	67.8858	6.30322
G4N667	Aconitate hydratase, mitochondrial OS=Magnaporthe oryzae (strain P131) GN=OOW_P131scaffold01302g18 PE=3 SV=1 - [L7IWI3_MAGOP]	3.62	1	2	3	8	801	801	85.9445	6.07471
G4N4D5	Glutamate carboxypeptidase 2 OS=Magnaporthe oryzae (strain P131) GN=OOW_P131scaffold01684g1 PE=4 SV=1 - [L7IQG7_MAGOP]	9.53	1	7	7	14	913	913	102.206	5.49072
G4MQB8	Uncharacterized protein OS=Magnaporthe oryzae (strain P131) GN=OOW_P131scaffold01697g22 PE=4 SV=1 - [L7IR84_MAGOP]	14.95	1	2	2	8	214	214	24.4271	5.8335
G4NAQ4	Alkaline proteinase OS=Magnaporthe oryzae (strain P131) GN=OOW_P131scaffold00540g1 PE=3 SV=1 - [L7J9V2_MAGOP]	15.99	1	12	12	22	963	963	102.689	6.25244
G4N9L9	Alpha-galactosidase OS=Magnaporthe oryzae (strain 70-15 / ATCC MYA-4617 / FGSC 8958) GN=MGG_13626 PE=3 SV=1 - [G4N9L9_MAGO7]	19.91	3	7	7	16	427	427	46.2989	8.27979
A4QQ05	Riboflavin kinase (Fragment) OS=Magnaporthe oryzae (strain P131) GN=OOW_P131scaffold00415g21 PE=4 SV=1 - [L7JDD9_MAGOP]	33.13	3	4	4	17	163	163	17.9719	5.10986
G4N893	Uncharacterized protein OS=Magnaporthe oryzae (strain 70-15 / ATCC MYA-4617 / FGSC 8958) GN=MGG_03466 PE=4 SV=1 - [G4N893_MAGO7]	36.1	1	5	5	11	205	205	21.7017	6.771
G4N585	Uncharacterized protein OS=Magnaporthe oryzae (strain P131) GN=OOW_P131scaffold00196g1 PE=4 SV=1 - [L7JLD6_MAGOP]	19.69	2	4	4	8	259	259	29.1582	5.59229
G4N152	Uncharacterized protein OS=Magnaporthe oryzae (strain 70-15 / ATCC MYA-4617 / FGSC 8958) GN=MGG_07442 PE=4 SV=1 - [G4N152_MAGO7]	4.23	1	1	1	2	331	331	35.3711	5.94775
Q9UVR2	Ubiquitin-conjugating enzyme E2-16 kDa OS=Magnaporthe oryzae (strain 70-15 / ATCC MYA-4617 / FGSC 8958) GN=UBC1 PE=3 SV=2 - [UBC1_MAGO7]	21.77	1	4	4	16	147	147	16.4273	6.91748
G4MVP0	Uncharacterized protein OS=Magnaporthe oryzae (strain P131) GN=OOW_P131scaffold00625g16 PE=4 SV=1 - [L7J9A3_MAGOP]	4.3	2	3	3	5	1000	1000	106.844	5.2876
G4N6G4	60S ribosomal protein OS=Magnaporthe oryzae PE=2 SV=1 - [D4NXC1_MAGOR]	45.97	1	7	7	29	124	124	14.1477	10.3159
G4N8T5	Sulphydryl oxidase OS=Magnaporthe oryzae (strain 70-15 / ATCC MYA-4617 / FGSC 8958) GN=MGG_13578 PE=4 SV=1 - [G4N8T5_MAGO7]	18.59	1	6	6	12	398	398	43.5699	5.60498
G4MXB0	Ubiquitinyl hydrolase 1 OS=Magnaporthe oryzae (strain P131) GN=OOW_P131scaffold01570g22 PE=3 SV=1 - [L7IRP4_MAGOP]	12.58	1	7	7	12	787	787	86.9345	5.21143
G4N169	Uncharacterized protein OS=Magnaporthe oryzae (strain 70-15 / ATCC MYA-4617 / FGSC 8958) GN=MGG_07457 PE=4 SV=1 - [G4N169_MAGO7]	30.36	2	8	8	11	336	336	37.6275	5.8208
A4QVR2	Histone H2A.Z OS=Magnaporthe oryzae (strain 70-15 / ATCC MYA-4617 / FGSC 8958) GN=HTZ1 PE=3 SV=1 - [H2AZ_MAGO7]	11.97	1	1	2	12	142	142	15.2644	10.3452
G4MV07	FACT complex subunit spt-16 OS=Magnaporthe oryzae (strain 70-15 / ATCC MYA-4617 / FGSC 8958) GN=MGG_07316 PE=4 SV=1 - [G4MV07_MAGO7]	8.51	2	7	7	21	1034	1034	117.69	5.5542
G4MT70	Cullin-1 OS=Magnaporthe oryzae (strain P131) GN=OOW_P131scaffold00922g7 PE=3 SV=1 - [L7J6W3_MAGOP]	10.18	2	6	6	17	766	766	88.1687	6.82959
A4QWP8	Extracellular metalloproteinase MEP OS=Magnaporthe oryzae (strain 70-15 / ATCC MYA-4617 / FGSC 8958) GN=MEP PE=2 SV=1 - [MEP_MAGO7]	15.43	1	5	5	9	635	635	68.3347	5.46533
G4MPP8	Uncharacterized protein OS=Magnaporthe oryzae (strain 70-15 / ATCC MYA-4617 / FGSC 8958) GN=MGG_02239 PE=4 SV=1 - [G4MPP8_MAGO7]	36.26	1	5	5	13	171	171	18.5844	5.2749
G4NFN7	Methyltransferase-UbiE family protein OS=Magnaporthe oryzae (strain 70-15 / ATCC MYA-4617 / FGSC 8958) GN=MGG_08768 PE=4 SV=1 - [G4NFN7_MAGO7]	37	1	8	8	11	273	273	29.7981	5.40186
G4N6I5	NADP-dependent leukotriene B4 12-hydroxydehydrogenase OS=Magnaporthe oryzae (strain P131) GN=OOW_P131scaffold00378g43 PE=4 SV=1 - [L7JFE8_MAGOP]	20.17	2	5	5	11	357	357	38.4147	6.1001
A4R935	NADH-cytochrome b5 reductase 1 OS=Magnaporthe oryzae (strain 70-15 / ATCC MYA-4617 / FGSC 8958) GN=CBR1 PE=3 SV=1 - [NCB5R_MAGO7]	25.89	1	7	7	12	309	309	33.609	9.26123
G4N9Z3	DNA-directed RNA polymerase II subunit RPB3 OS=Magnaporthe oryzae (strain P131) GN=OOW_P131scaffold00168g14 PE=4 SV=1 - [L7JP43_MAGOP]	14.24	1	3	3	9	330	330	36.3965	4.80518
G4MLF9	Uncharacterized protein OS=Magnaporthe oryzae (strain 70-15 / ATCC MYA-4617 / FGSC 8958) GN=MGG_08659 PE=4 SV=1 - [G4MLF9_MAGO7]	7.19	1	1	1	3	153	153	16.8433	6.94678
G4N1C8	Hydroxyisourate hydrolase OS=Magnaporthe oryzae (strain 70-15 / ATCC MYA-4617 / FGSC 8958) GN=MGG_09534 PE=4 SV=1 - [G4N1C8_MAGO7]	6.43	1	1	1	6	171	171	18.563	6.17627
A4QYU7	Catabolic 3-dehydroquinase OS=Magnaporthe oryzae (strain 70-15 / ATCC MYA-4617 / FGSC 8958) GN=qutE PE=3 SV=1 - [3DHQ_MAGO7]	40.13	1	4	4	13	157	157	16.7829	7.62061
P0CT15	40S ribosomal protein S29 OS=Magnaporthe oryzae (strain Y34) GN=RPS29 PE=3 SV=1 - [RS29_MAGOY]	26.79	1	2	2	9	56	56	6.49128	10.272
G4N5X6	Amidohydrolase OS=Magnaporthe oryzae (strain 70-15 / ATCC MYA-4617 / FGSC 8958) GN=MGG_08554 PE=4 SV=1 - [G4N5X6_MAGO7]	12.61	2	5	5	17	563	563	59.9558	5.75732
G4MYZ1	alpha-1,2-Mannosidase OS=Magnaporthe oryzae (strain 70-15 / ATCC MYA-4617 / FGSC 8958) GN=MGG_11408 PE=3 SV=1 - [G4MYZ1_MAGO7]	4.97	2	3	3	9	664	664	75.2654	6.60986
G4N9A9	Uncharacterized protein OS=Magnaporthe oryzae (strain 70-15 / ATCC MYA-4617 / FGSC 8958) GN=MGG_10035 PE=4 SV=1 - [G4N9A9_MAGO7]	29.77	2	6	6	24	299	299	31.7493	6.03662
G4NIQ5	ER membrane protein complex subunit 4 OS=Magnaporthe oryzae (strain P131) GN=OOW_P131scaffold01393g3 PE=3 SV=1 - [L7ITW6_MAGOP]	33.68	2	6	6	13	190	190	20.9748	9.5249
G4NBP7	Proliferating cell nuclear antigen OS=Magnaporthe oryzae (strain P131) GN=OOW_P131scaffold01046g14 PE=3 SV=1 - [L7J5F8_MAGOP]	30.12	1	6	6	9	259	259	28.4012	4.64014
G4MXA6	Uncharacterized protein OS=Magnaporthe oryzae (strain 70-15 / ATCC MYA-4617 / FGSC 8958) GN=MGG_08275 PE=4 SV=1 - [G4MXA6_MAGO7]	29.21	1	4	4	8	202	202	21.2388	8.17725
G4N6R4	Uncharacterized protein OS=Magnaporthe oryzae (strain 70-15 / ATCC MYA-4617 / FGSC 8958) GN=MGG_03682 PE=4 SV=1 - [G4N6R4_MAGO7]	9.74	1	5	5	12	585	585	65.2392	7.02002
G4MTQ6	Small nuclear ribonucleoprotein Sm D1 OS=Magnaporthe oryzae (strain P131) GN=OOW_P131scaffold00538g44 PE=4 SV=1 - [L7J9Y5_MAGOP]	44.8	1	3	3	16	125	125	13.5402	11.2681
A4QU31	ATP-dependent RNA helicase FAL1 OS=Magnaporthe oryzae (strain 70-15 / ATCC MYA-4617 / FGSC 8958) GN=FAL1 PE=3 SV=1 - [FAL1_MAGO7]	7.73	1	1	4	15	401	401	45.5231	6.1001
G4MNB9	Uncharacterized protein OS=Magnaporthe oryzae (strain 70-15 / ATCC MYA-4617 / FGSC 8958) GN=MGG_02084 PE=4 SV=1 - [G4MNB9_MAGO7]	21.02	1	4	4	8	314	314	34.0248	6.90283
G4MQP4	Coatomer subunit zeta OS=Magnaporthe oryzae (strain P131) GN=OOW_P131scaffold01069g20 PE=4 SV=1 - [L7J2Q7_MAGOP]	23.65	1	3	3	12	203	203	22.2336	5.021
G4NCD4	Uncharacterized protein OS=Magnaporthe oryzae (strain 70-15 / ATCC MYA-4617 / FGSC 8958) GN=MGG_00409 PE=4 SV=1 - [G4NCD4_MAGO7]	35.71	2	3	3	10	112	112	11.2668	7.31299
G4NAY6	Alcohol dehydrogenase OS=Magnaporthe oryzae (strain 70-15 / ATCC MYA-4617 / FGSC 8958) GN=MGG_11519 PE=4 SV=1 - [G4NAY6_MAGO7]	19.05	3	6	6	13	336	336	35.8611	9.02686
G5EHP3	Uncharacterized protein OS=Magnaporthe oryzae (strain 70-15 / ATCC MYA-4617 / FGSC 8958) GN=MGCH7_ch7g873 PE=4 SV=1 - [G5EHP3_MAGO7]	12.43	1	2	2	6	185	185	17.3694	7.54736
G4MWY7	GPI-anchored wall transfer protein OS=Magnaporthe oryzae (strain 70-15 / ATCC MYA-4617 / FGSC 8958) GN=MGG_01198 PE=3 SV=1 - [G4MWY7_MAGO7]	2.61	1	1	1	6	498	498	54.0603	9.68604
Q2KFW8	Putative uncharacterized protein OS=Magnaporthe oryzae (strain 70-15 / ATCC MYA-4617 / FGSC 8958) GN=MGCH7_ch7g567 PE=4 SV=1 - [Q2KFW8_MAGO7]	24.17	2	5	5	20	240	240	26.3785	6.94678
G4MPS9	Dehydrogenase/reductase SDR family member 4 OS=Magnaporthe oryzae (strain P131) GN=OOW_P131scaffold00382g14 PE=4 SV=1 - [L7JE55_MAGOP]	8.45	1	2	2	6	284	284	29.1602	8.68994
G5EHZ2	Uncharacterized protein OS=Magnaporthe oryzae (strain 70-15 / ATCC MYA-4617 / FGSC 8958) GN=MGCH7_ch7g41 PE=4 SV=1 - [G5EHZ2_MAGO7]	10.94	1	5	5	10	530	530	56.8049	6.60986
G4N959	Uncharacterized protein OS=Magnaporthe oryzae (strain P131) GN=OOW_P131scaffold00459g36 PE=4 SV=1 - [L7JCA9_MAGOP]	9.76	1	5	5	13	584	584	65.5098	7.53271
G4MP59	Plasma membrane iron permease OS=Magnaporthe oryzae (strain 70-15 / ATCC MYA-4617 / FGSC 8958) GN=MGG_02158 PE=4 SV=1 - [G4MP59_MAGO7]	5.38	2	1	1	3	372	372	40.2399	6.25244
G4N2S5	Alkaline phosphatase OS=Magnaporthe oryzae (strain 70-15 / ATCC MYA-4617 / FGSC 8958) GN=MGG_04900 PE=3 SV=1 - [G4N2S5_MAGO7]	12.87	2	8	8	17	668	668	73.0972	6.27783
G5EHZ7	Carboxylic ester hydrolase OS=Magnaporthe oryzae (strain 70-15 / ATCC MYA-4617 / FGSC 8958) GN=MGCH7_ch7g93 PE=3 SV=1 - [G5EHZ7_MAGO7]	12.13	1	5	5	7	569	569	60.7746	4.83057
G4N1P2	Uncharacterized protein OS=Magnaporthe oryzae (strain 70-15 / ATCC MYA-4617 / FGSC 8958) GN=MGG_13410 PE=4 SV=1 - [G4N1P2_MAGO7]	8.74	2	1	1	5	103	103	11.4607	7.81104
G4MU49	Uncharacterized protein OS=Magnaporthe oryzae (strain P131) GN=OOW_P131scaffold00340g11 PE=4 SV=1 - [L7JFQ9_MAGOP]	9.09	1	1	1	3	121	121	13.654	5.42725
G5EHW4	Hsp70-like protein OS=Magnaporthe oryzae (strain 70-15 / ATCC MYA-4617 / FGSC 8958) GN=MGCH7_ch7g831 PE=3 SV=1 - [G5EHW4_MAGO7]	14.25	1	11	11	19	765	765	83.2092	8.29443
G4N072	Uncharacterized protein OS=Magnaporthe oryzae (strain P131) GN=OOW_P131scaffold00984g44 PE=4 SV=1 - [L7J5C7_MAGOP]	23.58	1	4	4	9	335	335	36.2644	4.80518
G4MR23	Ribosomal protein S30 OS=Magnaporthe oryzae PE=2 SV=1 - [D4NXD6_MAGOR]	30.16	1	2	2	11	63	63	7.05489	11.6636
G4MWG0	Nicotinamidase OS=Magnaporthe oryzae (strain 70-15 / ATCC MYA-4617 / FGSC 8958) GN=MGG_08976 PE=4 SV=1 - [G4MWG0_MAGO7]	11.3	2	3	3	10	230	230	24.8066	4.80518
G4N974	AP complex subunit beta OS=Magnaporthe oryzae (strain 70-15 / ATCC MYA-4617 / FGSC 8958) GN=MGG_03320 PE=3 SV=1 - [G4N974_MAGO7]	6.37	1	4	4	11	738	738	80.1073	5.17334
G4MPD5	Malate dehydrogenase OS=Magnaporthe oryzae (strain P131) GN=OOW_P131scaffold00255g34 PE=4 SV=1 - [L7JJD7_MAGOP]	18.25	1	4	4	11	263	263	27.3796	6.99072
G4N6G1	Histidyl-tRNA synthetase OS=Magnaporthe oryzae (strain 70-15 / ATCC MYA-4617 / FGSC 8958) GN=MGG_15290 PE=3 SV=1 - [G4N6G1_MAGO7]	18.86	2	10	10	16	615	615	67.1811	8.70459
G4NBP9	Deoxyuridine 5'-triphosphate nucleotidohydrolase OS=Magnaporthe oryzae (strain 70-15 / ATCC MYA-4617 / FGSC 8958) GN=MGG_17439 PE=4 SV=1 - [G4NBP9_MAGO7]	21.58	2	3	3	10	190	190	20.0654	5.65576
G5EHV6	Carboxylic ester hydrolase OS=Magnaporthe oryzae (strain 70-15 / ATCC MYA-4617 / FGSC 8958) GN=MGCH7_ch7g582 PE=3 SV=1 - [G5EHV6_MAGO7]	27.14	1	10	10	12	560	560	61.6351	5.09717
G4MZY7	Molybdopterin binding domain-containing protein OS=Magnaporthe oryzae (strain P131) GN=OOW_P131scaffold00455g10 PE=4 SV=1 - [L7JD55_MAGOP]	22.79	2	5	5	11	294	294	32.8369	5.78271
G4MSH9	Karyopherin OS=Magnaporthe oryzae (strain P131) GN=OOW_P131scaffold00998g35 PE=4 SV=1 - [L7J518_MAGOP]	19.36	1	14	14	23	971	971	109.522	5.10986
G4NDA5	Uncharacterized protein OS=Magnaporthe oryzae (strain 70-15 / ATCC MYA-4617 / FGSC 8958) GN=MGG_00271 PE=4 SV=1 - [G4NDA5_MAGO7]	18.86	2	3	3	5	297	297	31.825	8.74854
A4RHN3	Eukaryotic translation initiation factor 3 subunit G OS=Magnaporthe oryzae (strain 70-15 / ATCC MYA-4617 / FGSC 8958) GN=TIF35 PE=3 SV=1 - [EIF3G_MAGO7]	7.92	1	2	2	9	303	303	32.9447	8.99756
G4N1T4	Uncharacterized protein OS=Magnaporthe oryzae (strain 70-15 / ATCC MYA-4617 / FGSC 8958) GN=MGG_12994 PE=4 SV=1 - [G4N1T4_MAGO7]	13.64	1	3	3	8	264	264	28.396	6.12549
G4MN13	Seryl-tRNA synthetase OS=Magnaporthe oryzae (strain P131) GN=OOW_P131scaffold00328g25 PE=4 SV=1 - [L7JI49_MAGOP]	20.08	3	7	7	9	478	478	53.6683	6.29053
G4MLN4	Guanylate kinase OS=Magnaporthe oryzae PE=2 SV=1 - [D4NXG6_MAGOR]	30.26	2	5	5	9	195	195	22.1372	6.15088
G4MSG1	Proteasome component PUP1 OS=Magnaporthe oryzae (strain 70-15 / ATCC MYA-4617 / FGSC 8958) GN=MGG_04529 PE=4 SV=1 - [G4MSG1_MAGO7]	16.24	1	5	5	17	271	271	29.0867	7.1958
G4MQ26	Carboxylic ester hydrolase OS=Magnaporthe oryzae (strain 70-15 / ATCC MYA-4617 / FGSC 8958) GN=MGG_02261 PE=3 SV=1 - [G4MQ26_MAGO7]	15.34	2	9	9	12	652	652	71.3724	5.021
G4MVP8	Plasma membrane channel protein, variant OS=Magnaporthe oryzae (strain 70-15 / ATCC MYA-4617 / FGSC 8958) GN=MGG_01769 PE=4 SV=1 - [G4MVP8_MAGO7]	11.56	4	5	5	6	614	614	69.6464	8.52881
G4N1W1	Uncharacterized protein OS=Magnaporthe oryzae (strain 70-15 / ATCC MYA-4617 / FGSC 8958) GN=MGG_09469 PE=4 SV=1 - [G4N1W1_MAGO7]	9.55	2	4	4	6	513	513	56.8511	4.95752
A4RGT4	Extracellular metalloprotease MGG_08041 OS=Magnaporthe oryzae (strain 70-15 / ATCC MYA-4617 / FGSC 8958) GN=MGG_08041 PE=3 SV=1 - [MEP1_MAGO7]	14.84	1	3	3	13	283	283	29.9344	5.04639
G4MSV9	Cytochrome P450 3A12 OS=Magnaporthe oryzae (strain 70-15 / ATCC MYA-4617 / FGSC 8958) GN=MGG_04605 PE=3 SV=1 - [G4MSV9_MAGO7]	12.8	1	6	6	12	539	539	60.5193	7.53271
G4NHY8	HET-C2 protein OS=Magnaporthe oryzae (strain P131) GN=OOW_P131scaffold01314g10 PE=4 SV=1 - [L7IVZ9_MAGOP]	28.57	2	4	4	7	203	203	22.1677	8.07471
G4N7N1	Phospholipid:diacylglycerol acyltransferase OS=Magnaporthe oryzae (strain 70-15 / ATCC MYA-4617 / FGSC 8958) GN=MGG_03560 PE=4 SV=1 - [G4N7N1_MAGO7]	9.87	2	6	6	9	638	638	71.1329	8.14795
G4MWJ6	Uncharacterized protein OS=Magnaporthe oryzae (strain 70-15 / ATCC MYA-4617 / FGSC 8958) GN=MGG_01168 PE=4 SV=1 - [G4MWJ6_MAGO7]	9.2	2	4	4	11	435	435	47.6006	9.11475
G4MXJ5	Sorbitol dehydrogenase OS=Magnaporthe oryzae (strain P131) GN=OOW_P131scaffold01065g5 PE=4 SV=1 - [L7J2Y5_MAGOP]	14.78	1	6	6	15	372	372	40.0026	6.0874
G4NLA6	Phosphoglycerate mutase OS=Magnaporthe oryzae (strain 70-15 / ATCC MYA-4617 / FGSC 8958) GN=MGG_02967 PE=4 SV=1 - [G4NLA6_MAGO7]	12.16	2	2	2	3	255	255	28.4316	6.13818
G4N355	High-affinity nicotinic acid transporter OS=Magnaporthe oryzae (strain 70-15 / ATCC MYA-4617 / FGSC 8958) GN=MGG_04927 PE=4 SV=1 - [G4N355_MAGO7]	3.43	2	2	2	5	496	496	54.8852	8.77783
O42621	Imidazoleglycerol-phosphate dehydratase OS=Magnaporthe oryzae (strain 70-15 / ATCC MYA-4617 / FGSC 8958) GN=PTH3 PE=3 SV=2 - [HIS7_MAGO7]	37.78	1	5	5	13	225	225	23.734	6.65381
G4NDB7	Uncharacterized protein OS=Magnaporthe oryzae (strain 70-15 / ATCC MYA-4617 / FGSC 8958) GN=MGG_17486 PE=4 SV=1 - [G4NDB7_MAGO7]	18.27	2	10	10	16	799	799	86.0348	5.8335
G4MUS7	Cleavage and polyadenylation specificity factor subunit 5 OS=Magnaporthe oryzae (strain 70-15 / ATCC MYA-4617 / FGSC 8958) GN=MGG_01676 PE=4 SV=1 - [G4MUS7_MAGO7]	16.92	1	3	3	10	266	266	29.917	5.90967
G4N8V8	Beta-1,6-galactanase OS=Magnaporthe oryzae (strain 70-15 / ATCC MYA-4617 / FGSC 8958) GN=MGG_03374 PE=3 SV=1 - [G4N8V8_MAGO7]	21.28	1	8	8	18	423	423	47.215	5.66846
G4MM47	Uncharacterized protein OS=Magnaporthe oryzae (strain 70-15 / ATCC MYA-4617 / FGSC 8958) GN=MGG_06828 PE=4 SV=1 - [G4MM47_MAGO7]	7.66	3	4	4	8	496	496	55.4758	8.20654
G5EI55	RRM domain-containing protein OS=Magnaporthe oryzae (strain 70-15 / ATCC MYA-4617 / FGSC 8958) GN=MGCH7_ch7g489 PE=4 SV=1 - [G5EI55_MAGO7]	3.3	1	1	1	2	424	424	44.2534	5.5542
G5EHL1	Ubiquitin carboxyl-terminal hydrolase 6 OS=Magnaporthe oryzae (strain 70-15 / ATCC MYA-4617 / FGSC 8958) GN=MGCH7_ch7g748 PE=3 SV=1 - [G5EHL1_MAGO7]	6.46	1	3	3	6	557	557	62.2165	5.93506
G4MMH7	Annexin A7 OS=Magnaporthe oryzae (strain 70-15 / ATCC MYA-4617 / FGSC 8958) GN=MGG_06847 PE=4 SV=1 - [G4MMH7_MAGO7]	16.51	1	6	6	11	436	436	48.8803	7.72314
G4MK84	Uncharacterized protein OS=Magnaporthe oryzae (strain 70-15 / ATCC MYA-4617 / FGSC 8958) GN=MGG_02490 PE=4 SV=1 - [G4MK84_MAGO7]	12.61	1	1	1	4	111	111	12.6825	8.76318
G4N9N2	Uncharacterized protein OS=Magnaporthe oryzae (strain P131) GN=OOW_P131scaffold00117g13 PE=4 SV=1 - [L7JNH9_MAGOP]	12.15	1	5	5	9	609	609	68.0994	9.81787
G4MSW5	Uncharacterized protein OS=Magnaporthe oryzae (strain 70-15 / ATCC MYA-4617 / FGSC 8958) GN=MGG_04614 PE=4 SV=1 - [G4MSW5_MAGO7]	30.23	1	2	2	8	86	86	9.92296	10.1987
G4N9C3	Uncharacterized protein OS=Magnaporthe oryzae (strain 70-15 / ATCC MYA-4617 / FGSC 8958) GN=MGG_10023 PE=4 SV=1 - [G4N9C3_MAGO7]	5.54	2	1	1	4	307	307	31.9634	8.92432
G4N1A1	Tetratricopeptide repeat domain-containing protein OS=Magnaporthe oryzae (strain 70-15 / ATCC MYA-4617 / FGSC 8958) GN=MGG_07480 PE=4 SV=1 - [G4N1A1_MAGO7]	21.04	2	6	6	12	328	328	36.4857	5.22412
G4MUP1	Uncharacterized protein OS=Magnaporthe oryzae (strain 70-15 / ATCC MYA-4617 / FGSC 8958) GN=MGG_11335 PE=4 SV=1 - [G4MUP1_MAGO7]	6.4	2	3	3	11	609	609	65.3016	7.44482
G4MT11	6-phosphogluconate dehydrogenase OS=Magnaporthe oryzae (strain 70-15 / ATCC MYA-4617 / FGSC 8958) GN=MGG_01506 PE=4 SV=1 - [G4MT11_MAGO7]	16.18	1	4	4	11	309	309	32.7411	6.80029
G4N5K7	GTP-binding protein ypt2 OS=Magnaporthe oryzae PE=4 SV=1 - [A0A060D1P1_MAGOR]	18.45	1	1	3	14	206	206	22.7185	7.03467
G4MYG7	GPI-anchor transamidase OS=Magnaporthe oryzae (strain 70-15 / ATCC MYA-4617 / FGSC 8958) GN=MGG_10490 PE=4 SV=1 - [G4MYG7_MAGO7]	11.17	2	4	4	8	394	394	44.015	5.14795
G4MSB5	Endosomal protein P24B OS=Magnaporthe oryzae (strain P131) GN=OOW_P131scaffold01358g8 PE=3 SV=1 - [L7IUW0_MAGOP]	13.79	1	3	3	18	203	203	23.3555	5.93506
G4NGA5	Allantoinase OS=Magnaporthe oryzae (strain 70-15 / ATCC MYA-4617 / FGSC 8958) GN=MGG_10412 PE=4 SV=1 - [G4NGA5_MAGO7]	8.91	1	4	4	10	550	550	58.5979	6.22705
G4NIQ6	AP complex subunit beta OS=Magnaporthe oryzae (strain 70-15 / ATCC MYA-4617 / FGSC 8958) GN=MGG_04150 PE=3 SV=1 - [G4NIQ6_MAGO7]	2.9	2	2	2	5	724	724	80.6239	6.25244
G4N0E1	PNS1 OS=Magnaporthe oryzae (strain 70-15 / ATCC MYA-4617 / FGSC 8958) GN=MGG_13186 PE=3 SV=1 - [G4N0E1_MAGO7]	7.35	1	3	3	6	558	558	61.7284	8.52881
G4NC87	Alcohol dehydrogenase OS=Magnaporthe oryzae (strain P131) GN=OOW_P131scaffold00304g27 PE=4 SV=1 - [L7JIE7_MAGOP]	10.95	1	3	3	4	347	347	37.7561	5.93506
G4MPX1	Uncharacterized protein OS=Magnaporthe oryzae (strain P131) GN=OOW_P131scaffold01338g23 PE=4 SV=1 - [L7IVI0_MAGOP]	26.55	1	2	2	6	113	113	12.6386	10.0669
Q2KF98	Putative uncharacterized protein OS=Magnaporthe oryzae (strain 70-15 / ATCC MYA-4617 / FGSC 8958) GN=MGCH7_ch7g788 PE=4 SV=1 - [Q2KF98_MAGO7]	2.93	4	2	2	12	682	682	76.4752	7.82568
G4N495	Uncharacterized protein OS=Magnaporthe oryzae (strain 70-15 / ATCC MYA-4617 / FGSC 8958) GN=MGG_05936 PE=4 SV=1 - [G4N495_MAGO7]	16.59	1	6	6	9	440	440	48.4859	6.62451
G4MWC3	1,3-beta-glucanosyltransferase OS=Magnaporthe oryzae (strain 70-15 / ATCC MYA-4617 / FGSC 8958) GN=MGG_08370 PE=3 SV=1 - [G4MWC3_MAGO7]	9.57	1	4	4	4	533	533	55.8361	5.69385
G4ML77	Uncharacterized protein OS=Magnaporthe oryzae (strain 70-15 / ATCC MYA-4617 / FGSC 8958) GN=MGG_06714 PE=4 SV=1 - [G4ML77_MAGO7]	24.82	1	4	4	10	274	274	29.7788	7.69385
G4MZG2	mRNA export factor mex67 OS=Magnaporthe oryzae (strain P131) GN=OOW_P131scaffold01166g31 PE=4 SV=1 - [L7J2A4_MAGOP]	7.59	1	3	3	5	659	659	72.1969	8.89502
G4MVS3	Acyl-CoA desaturase OS=Magnaporthe oryzae (strain P131) GN=OOW_P131scaffold00233g2 PE=3 SV=1 - [L7JJW2_MAGOP]	18.32	1	5	5	9	475	475	53.4873	9.21729
G4MZG5	Cytochrome P450 51 OS=Magnaporthe oryzae (strain 70-15 / ATCC MYA-4617 / FGSC 8958) GN=MGG_04432 PE=3 SV=1 - [G4MZG5_MAGO7]	19.01	1	8	8	17	526	526	59.3484	7.72314
G4NIE1	Flagellar associated protein OS=Magnaporthe oryzae (strain 70-15 / ATCC MYA-4617 / FGSC 8958) GN=MGG_09866 PE=3 SV=1 - [G4NIE1_MAGO7]	12.31	2	7	7	11	666	666	74.4478	6.45557
G4N6Y3	D-arabinitol 2-dehydrogenase OS=Magnaporthe oryzae (strain P131) GN=OOW_P131scaffold01381g2 PE=4 SV=1 - [L7IT30_MAGOP]	28.18	1	8	8	17	369	369	38.9937	8.19189
G4N6H8	Annexin ANXC4 OS=Magnaporthe oryzae (strain 70-15 / ATCC MYA-4617 / FGSC 8958) GN=MGG_03714 PE=4 SV=1 - [G4N6H8_MAGO7]	6.99	2	3	3	8	644	644	73.2819	9.18799
G4MZ47	Calcium permease OS=Magnaporthe oryzae (strain P131) GN=OOW_P131scaffold00507g1 PE=3 SV=1 - [L7JAQ1_MAGOP]	6.13	1	5	5	7	1158	1158	126.763	6.60986
G4MQP7	Alcohol dehydrogenase OS=Magnaporthe oryzae (strain P131) GN=OOW_P131scaffold01069g23 PE=4 SV=1 - [L7J3V9_MAGOP]	25.48	1	5	5	12	310	310	32.9273	8.49951
G4N305	Carboxypeptidase A OS=Magnaporthe oryzae (strain 70-15 / ATCC MYA-4617 / FGSC 8958) GN=MGG_07645 PE=4 SV=1 - [G4N305_MAGO7]	12.4	2	5	5	7	484	484	53.2006	5.59229
G5EGZ6	UBX domain-containing protein 8 OS=Magnaporthe oryzae (strain 70-15 / ATCC MYA-4617 / FGSC 8958) GN=MGCH7_ch7g711 PE=4 SV=1 - [G5EGZ6_MAGO7]	4.49	1	2	2	5	512	512	57.6062	5.21143
G4NGZ3	Hsp70 nucleotide exchange factor FES1 OS=Magnaporthe oryzae (strain P131) GN=OOW_P131scaffold00186g1 PE=4 SV=1 - [L7JMS7_MAGOP]	33.18	1	4	4	8	217	217	23.3698	4.66553
G4MW44	Cuticle-degrading protease OS=Magnaporthe oryzae (strain P131) GN=OOW_P131scaffold01267g5 PE=3 SV=1 - [L7IYL8_MAGOP]	8.42	1	2	2	7	380	380	38.4952	6.12549
G4NG73	Haloacid dehalogenase OS=Magnaporthe oryzae (strain P131) GN=OOW_P131scaffold00051g4 PE=4 SV=1 - [L7JPX2_MAGOP]	27.92	1	5	5	10	240	240	26.6414	5.33838
G4MYW5	Transmembrane protein 111 OS=Magnaporthe oryzae (strain 70-15 / ATCC MYA-4617 / FGSC 8958) GN=MGG_10831 PE=4 SV=1 - [G4MYW5_MAGO7]	26.82	1	5	5	11	261	261	29.2556	8.6167
G4N2H2	Uncharacterized protein OS=Magnaporthe oryzae (strain 70-15 / ATCC MYA-4617 / FGSC 8958) GN=MGG_16969 PE=4 SV=1 - [G4N2H2_MAGO7]	15.96	3	4	4	5	376	376	39.3715	6.26514
G4N1T3	Uncharacterized protein OS=Magnaporthe oryzae (strain P131) GN=OOW_P131scaffold01234g12 PE=4 SV=1 - [L7IXV4_MAGOP]	11.61	1	6	7	11	663	663	74.4794	8.80713
A4R2Q6	Ribosome biogenesis protein YTM1 OS=Magnaporthe oryzae (strain 70-15 / ATCC MYA-4617 / FGSC 8958) GN=YTM1 PE=3 SV=2 - [YTM1_MAGO7]	7.64	2	3	3	4	484	484	52.1559	8.11865
G4N9U6	Plasma alpha-L-fucosidase OS=Magnaporthe oryzae (strain P131) GN=OOW_P131scaffold01311g34 PE=4 SV=1 - [L7IW46_MAGOP]	11.31	1	7	7	11	601	601	65.7933	5.61768
G4MN14	Uncharacterized protein OS=Magnaporthe oryzae (strain P131) GN=OOW_P131scaffold00328g24 PE=4 SV=1 - [L7JH80_MAGOP]	7.98	1	1	1	4	188	188	20.5945	6.39209
G4NF00	Rhamnolipids biosynthesis 3-oxoacyl-[acyl-carrier-protein] reductase OS=Magnaporthe oryzae (strain P131) GN=OOW_P131scaffold01213g25 PE=4 SV=1 - [L7IYH3_MAGOP]	18.32	1	4	4	11	262	262	27.2654	8.17725
G4NJL5	Ribosomal protein L37 OS=Magnaporthe oryzae (strain 70-15 / ATCC MYA-4617 / FGSC 8958) GN=MGG_02620 PE=3 SV=1 - [G4NJL5_MAGO7]	25.53	3	4	4	16	94	94	10.6595	11.4292
G4MWQ3	Glycerol-3-phosphate acyltransferase OS=Magnaporthe oryzae (strain 70-15 / ATCC MYA-4617 / FGSC 8958) GN=MGG_01894 PE=4 SV=1 - [G4MWQ3_MAGO7]	8.06	1	6	6	10	831	831	93.794	8.67529
G4N1A3	Uncharacterized protein OS=Magnaporthe oryzae (strain 70-15 / ATCC MYA-4617 / FGSC 8958) GN=MGG_09560 PE=3 SV=1 - [G4N1A3_MAGO7]	5.74	3	7	7	10	1272	1272	143.26	5.8335
G4MXT1	Cholesterol oxidase OS=Magnaporthe oryzae (strain 70-15 / ATCC MYA-4617 / FGSC 8958) GN=MGG_08072 PE=4 SV=1 - [G4MXT1_MAGO7]	6.69	1	8	8	11	1479	1479	163.066	7.45947
G4MU04	Mitochondrial DNA replication protein YHM2 OS=Magnaporthe oryzae (strain P131) GN=OOW_P131scaffold00461g22 PE=3 SV=1 - [L7JBX7_MAGOP]	14.83	1	4	4	8	317	317	34.0867	9.74463
G4N037	S-formylglutathione hydrolase OS=Magnaporthe oryzae (strain 70-15 / ATCC MYA-4617 / FGSC 8958) GN=MGG_05317 PE=3 SV=1 - [G4N037_MAGO7]	27.53	1	9	9	15	287	287	31.7856	6.53662
G4NEE7	Sporulation protein RMD1 OS=Magnaporthe oryzae (strain P131) GN=OOW_P131scaffold00034g37 PE=4 SV=1 - [L7JS83_MAGOP]	4.07	2	2	2	6	615	615	68.0672	5.68115
G4MSJ5	Phosphate metabolism protein 7 OS=Magnaporthe oryzae (strain 70-15 / ATCC MYA-4617 / FGSC 8958) GN=MGG_01463 PE=4 SV=1 - [G4MSJ5_MAGO7]	6.83	1	5	5	8	893	893	99.7552	8.36768
G4MXB3	Uncharacterized protein OS=Magnaporthe oryzae (strain 70-15 / ATCC MYA-4617 / FGSC 8958) GN=MGG_08267 PE=4 SV=1 - [G4MXB3_MAGO7]	13.89	2	5	5	9	540	540	58.1375	5.63037
G4N711	Serine/threonine-protein phosphatase dullard OS=Magnaporthe oryzae (strain 70-15 / ATCC MYA-4617 / FGSC 8958) GN=MGG_03646 PE=4 SV=1 - [G4N711_MAGO7]	9.11	2	3	3	4	505	505	54.2919	5.96045
G4NB92	Uncharacterized protein OS=Magnaporthe oryzae (strain 70-15 / ATCC MYA-4617 / FGSC 8958) GN=MGG_00601 PE=4 SV=1 - [G4NB92_MAGO7]	1.69	2	1	1	2	712	712	81.3805	7.04932
G4NFI9	Uncharacterized protein OS=Magnaporthe oryzae (strain 70-15 / ATCC MYA-4617 / FGSC 8958) GN=MGG_08808 PE=4 SV=1 - [G4NFI9_MAGO7]	16.56	1	2	2	4	157	157	16.9354	6.04932
G4NA71	Trichothecene 3-O-acetyltransferase OS=Magnaporthe oryzae (strain 70-15 / ATCC MYA-4617 / FGSC 8958) GN=MGG_08440 PE=4 SV=1 - [G4NA71_MAGO7]	9.89	1	4	4	7	475	475	52.0553	5.98584
G4NJD1	Amine oxidase OS=Magnaporthe oryzae (strain 70-15 / ATCC MYA-4617 / FGSC 8958) GN=MGG_15019 PE=3 SV=1 - [G4NJD1_MAGO7]	16.48	2	8	8	11	704	704	78.3504	6.59521
G4NFJ5	GMP synthase OS=Magnaporthe oryzae (strain 70-15 / ATCC MYA-4617 / FGSC 8958) GN=MGG_08802 PE=4 SV=1 - [G4NFJ5_MAGO7]	28.06	1	5	5	19	253	253	27.8173	6.21436
A4RJH4	Pro-apoptotic serine protease NMA111 OS=Magnaporthe oryzae (strain 70-15 / ATCC MYA-4617 / FGSC 8958) GN=NMA111 PE=3 SV=1 - [NM111_MAGO7]	8.45	3	7	7	11	1029	1029	113.421	5.49072
G4N388	Arginase OS=Magnaporthe oryzae (strain P131) GN=OOW_P131scaffold01380g10 PE=3 SV=1 - [L7ITD3_MAGOP]	14.01	1	5	5	14	357	357	38.4522	5.43994
G4MRE1	CAP20 OS=Magnaporthe oryzae (strain 70-15 / ATCC MYA-4617 / FGSC 8958) GN=MGG_11916 PE=4 SV=1 - [G4MRE1_MAGO7]	15.59	1	2	2	8	186	186	20.6217	9.08545
G4N775	Tetratricopeptide repeat protein 1 OS=Magnaporthe oryzae (strain P131) GN=OOW_P131scaffold01381g42 PE=4 SV=1 - [L7IT65_MAGOP]	2.38	1	3	3	4	1221	1221	136.585	5.80811
G4ND95	Uncharacterized protein OS=Magnaporthe oryzae (strain 70-15 / ATCC MYA-4617 / FGSC 8958) GN=MGG_00281 PE=4 SV=1 - [G4ND95_MAGO7]	14.85	1	2	2	5	229	229	25.8786	5.38916
G4N2E2	Erythrocyte band 7 integral membrane protein OS=Magnaporthe oryzae (strain P131) GN=OOW_P131scaffold00279g25 PE=4 SV=1 - [L7JI50_MAGOP]	18.44	1	6	6	13	423	423	44.7595	8.95361
G4MV90	Adenylyl cyclase-associated protein OS=Magnaporthe oryzae (strain P131) GN=OOW_P131scaffold00570g21 PE=3 SV=1 - [L7JB29_MAGOP]	13.7	2	7	7	13	533	533	57.5762	7.06396
G5EHH6	N-acetyltransferase OS=Magnaporthe oryzae (strain 70-15 / ATCC MYA-4617 / FGSC 8958) GN=MGCH7_ch7g108 PE=3 SV=1 - [G5EHH6_MAGO7]	17.5	1	5	5	8	320	320	35.7489	5.71924
G4MRV8	Tyrosine--tRNA ligase OS=Magnaporthe oryzae (strain 70-15 / ATCC MYA-4617 / FGSC 8958) GN=MGG_02449 PE=3 SV=1 - [G4MRV8_MAGO7]	18.04	2	6	6	14	388	388	43.235	6.96143
G4N3B7	alpha-1,2-Mannosidase OS=Magnaporthe oryzae (strain P131) GN=OOW_P131scaffold01103g15 PE=3 SV=1 - [L7J1U4_MAGOP]	13.55	2	6	6	10	642	642	72.1517	6.90283
G4MVE1	Fatty acid-binding protein OS=Magnaporthe oryzae (strain 70-15 / ATCC MYA-4617 / FGSC 8958) GN=MGG_07337 PE=4 SV=1 - [G4MVE1_MAGO7]	16	1	1	1	1	125	125	13.3738	9.30518
G4MMA8	Methylthioribose-1-phosphate isomerase OS=Magnaporthe oryzae (strain 70-15 / ATCC MYA-4617 / FGSC 8958) GN=MRI1 PE=3 SV=1 - [G4MMA8_MAGO7]	9.67	1	3	3	6	393	393	42.3319	6.1001
G4MPP1	Uncharacterized protein OS=Magnaporthe oryzae (strain 70-15 / ATCC MYA-4617 / FGSC 8958) GN=MGG_02234 PE=4 SV=1 - [G4MPP1_MAGO7]	7.87	1	1	1	6	178	178	19.2652	5.21143
G4NAN9	Cytochrome P450 52A13 OS=Magnaporthe oryzae (strain Y34) GN=OOU_Y34scaffold00740g4 PE=3 SV=1 - [L7HW63_MAGOY]	14.72	2	6	6	8	496	496	56.13	8.35303
G4N4S8	Uncharacterized protein OS=Magnaporthe oryzae (strain 70-15 / ATCC MYA-4617 / FGSC 8958) GN=MGG_05164 PE=4 SV=1 - [G4N4S8_MAGO7]	21.77	2	10	10	13	542	542	59.9999	6.69775
G4NGM8	Small nuclear ribonucleoprotein Sm D3 OS=Magnaporthe oryzae (strain P131) GN=OOW_P131scaffold01683g62 PE=4 SV=1 - [L7IQK8_MAGOP]	23.53	1	3	3	18	119	119	13.132	11.5903
G4N1N5	SCJ1 OS=Magnaporthe oryzae PE=2 SV=1 - [A8I4W3_MAGOR]	15.87	1	6	6	13	416	416	47.0242	6.56592
P52751	Hydrophobin (Fragment) OS=Magnaporthe oryzae PE=4 SV=1 - [Q58IF3_MAGOR]	24.59	7	1	1	7	61	61	6.44222	4.28467
G4N6Q3	Peptide hydrolase OS=Magnaporthe oryzae (strain P131) GN=OOW_P131scaffold01168g40 PE=3 SV=1 - [L7J1A0_MAGOP]	6.07	2	2	2	6	379	379	41.8961	4.89404
G4MQ56	Uncharacterized protein OS=Magnaporthe oryzae (strain 70-15 / ATCC MYA-4617 / FGSC 8958) GN=MGG_02295 PE=4 SV=1 - [G4MQ56_MAGO7]	21.84	2	7	8	13	467	467	50.5336	7.18115
G4MMD8	Isocitrate dehydrogenase [NAD] subunit, mitochondrial OS=Magnaporthe oryzae (strain P131) GN=OOW_P131scaffold01155g33 PE=3 SV=1 - [L7J0L1_MAGOP]	29.02	1	9	9	17	386	386	42.0177	8.93896
O13315	Guanine nucleotide-binding protein subunit alpha OS=Magnaporthe oryzae (strain 70-15 / ATCC MYA-4617 / FGSC 8958) GN=MAGB PE=3 SV=4 - [GPA1_MAGO7]	19.83	1	6	7	30	353	353	41.0455	5.22412
G4N1I9	Uncharacterized protein OS=Magnaporthe oryzae (strain 70-15 / ATCC MYA-4617 / FGSC 8958) GN=MGG_13875 PE=4 SV=1 - [G4N1I9_MAGO7]	17.34	1	5	5	10	346	346	38.1742	6.30322
G4NC85	Uncharacterized protein OS=Magnaporthe oryzae (strain 70-15 / ATCC MYA-4617 / FGSC 8958) GN=MGG_01116 PE=4 SV=1 - [G4NC85_MAGO7]	34.7	1	5	5	8	219	219	24.326	9.72998
G4MPJ3	Uncharacterized protein OS=Magnaporthe oryzae (strain 70-15 / ATCC MYA-4617 / FGSC 8958) GN=MGG_05737 PE=4 SV=1 - [G4MPJ3_MAGO7]	16.51	1	2	2	10	109	109	11.6356	5.05908
G4NK46	Endoglucanase 1 OS=Magnaporthe oryzae (strain 70-15 / ATCC MYA-4617 / FGSC 8958) GN=egl1 PE=1 SV=1 - [CEL7B_MAGO7]	14.15	3	5	5	5	424	424	45.0325	5.09717
G4MKK4	Chaperone protein dnaJ 2 OS=Magnaporthe oryzae (strain P131) GN=OOW_P131scaffold01159g11 PE=3 SV=1 - [L7J2E2_MAGOP]	9.35	1	3	3	11	417	417	45.2623	6.37939
G4MNE0	Uncharacterized protein OS=Magnaporthe oryzae (strain 70-15 / ATCC MYA-4617 / FGSC 8958) GN=MGG_06927 PE=4 SV=1 - [G4MNE0_MAGO7]	52.94	1	3	3	13	68	68	7.53988	10.3745
G4MXC1	Uncharacterized protein OS=Magnaporthe oryzae (strain P131) GN=OOW_P131scaffold01570g10 PE=4 SV=1 - [L7ITJ4_MAGOP]	5.73	1	3	3	7	558	558	59.9003	8.33838
G4MQ00	Uncharacterized protein OS=Magnaporthe oryzae (strain 70-15 / ATCC MYA-4617 / FGSC 8958) GN=MGG_10604 PE=4 SV=1 - [G4MQ00_MAGO7]	18.46	1	1	1	5	65	65	7.58666	7.25439
G4MQ44	Uncharacterized protein (Fragment) OS=Magnaporthe oryzae (strain P131) GN=OOW_P131scaffold00970g1 PE=4 SV=1 - [L7J619_MAGOP]	4.35	3	1	1	5	276	276	29.9302	5.07178
Q2KEM4	Uncharacterized protein OS=Magnaporthe oryzae (strain 70-15 / ATCC MYA-4617 / FGSC 8958) GN=MGCH7_ch7g1012 PE=4 SV=1 - [Q2KEM4_MAGO7]	14.4	1	4	4	8	382	382	41.3752	6.72705
G4MNI7	Alpha-galactosidase OS=Magnaporthe oryzae (strain P131) GN=OOW_P131scaffold00130g2 PE=3 SV=1 - [L7JPC5_MAGOP]	10.54	2	3	3	4	522	522	56.885	5.16064
G4NBD3	Uncharacterized protein OS=Magnaporthe oryzae (strain 70-15 / ATCC MYA-4617 / FGSC 8958) GN=MGG_14388 PE=4 SV=1 - [G4NBD3_MAGO7]	10.95	2	2	2	6	201	201	21.2393	4.48779
G5EH85	Epoxide hydrolase domain-containing protein OS=Magnaporthe oryzae (strain 70-15 / ATCC MYA-4617 / FGSC 8958) GN=MGCH7_ch7g872 PE=4 SV=1 - [G5EH85_MAGO7]	10.49	1	4	4	6	410	410	46.4892	6.17627
G4N9V3	Enoyl reductase OS=Magnaporthe oryzae GN=TSC13 PE=4 SV=1 - [H9B488_MAGOR]	9.7	2	3	3	9	330	330	37.0314	9.49561
G4MUU0	3-hydroxyisobutyrate dehydrogenase OS=Magnaporthe oryzae (strain P131) GN=OOW_P131scaffold00336g5 PE=3 SV=1 - [L7JFW0_MAGOP]	8.53	1	3	3	7	340	340	35.6642	8.71924
G4N2M2	Succinate/fumarate mitochondrial transporter OS=Magnaporthe oryzae (strain P131) GN=OOW_P131scaffold00555g9 PE=3 SV=1 - [L7J9I0_MAGOP]	12.96	1	4	4	9	324	324	34.8093	9.77393
G4NBS0	Carboxylic ester hydrolase OS=Magnaporthe oryzae (strain 70-15 / ATCC MYA-4617 / FGSC 8958) GN=MGG_00499 PE=3 SV=1 - [G4NBS0_MAGO7]	11.49	2	6	6	9	609	609	66.8905	5.73193
G4MT57	Polyamine acetyltransferase OS=Magnaporthe oryzae (strain 70-15 / ATCC MYA-4617 / FGSC 8958) GN=MGG_07134 PE=4 SV=1 - [G4MT57_MAGO7]	5.22	1	1	1	4	268	268	29.1927	6.11279
G4NI17	Phosphatidate cytidylyltransferase OS=Magnaporthe oryzae (strain 70-15 / ATCC MYA-4617 / FGSC 8958) GN=MGG_09371 PE=3 SV=1 - [G4NI17_MAGO7]	3.28	1	1	1	12	458	458	51.5716	9.26123
G4N277	GTP cyclohydrolase 1 OS=Magnaporthe oryzae (strain 70-15 / ATCC MYA-4617 / FGSC 8958) GN=MGG_09458 PE=3 SV=1 - [G4N277_MAGO7]	25.81	2	8	8	13	310	310	34.3499	9.61279
G4ND53	Uncharacterized protein OS=Magnaporthe oryzae (strain 70-15 / ATCC MYA-4617 / FGSC 8958) GN=MGG_00971 PE=4 SV=1 - [G4ND53_MAGO7]	16.27	2	4	4	10	338	338	35.9878	4.22119
G4MMY1	AP-1 complex subunit gamma-1 OS=Magnaporthe oryzae (strain 70-15 / ATCC MYA-4617 / FGSC 8958) GN=MGG_11801 PE=4 SV=1 - [G4MMY1_MAGO7]	13.49	3	8	8	15	845	845	92.3041	6.50732
G4MSS6	Uncharacterized protein OS=Magnaporthe oryzae (strain 70-15 / ATCC MYA-4617 / FGSC 8958) GN=MGG_04536 PE=4 SV=1 - [G4MSS6_MAGO7]	11.15	1	8	8	20	960	960	103.699	6.75635
G4MVY1	Peptide hydrolase OS=Magnaporthe oryzae (strain 70-15 / ATCC MYA-4617 / FGSC 8958) GN=MGG_12442 PE=3 SV=1 - [G4MVY1_MAGO7]	12.47	3	4	4	7	489	489	50.8155	5.09717
G4NAC7	Uncharacterized protein OS=Magnaporthe oryzae (strain 70-15 / ATCC MYA-4617 / FGSC 8958) GN=MGG_03195 PE=4 SV=1 - [G4NAC7_MAGO7]	26.7	2	4	4	6	176	176	19.0842	5.68115
G4MXR7	Uncharacterized protein OS=Magnaporthe oryzae (strain 70-15 / ATCC MYA-4617 / FGSC 8958) GN=MGG_08059 PE=4 SV=1 - [G4MXR7_MAGO7]	10.29	1	2	2	4	204	204	23.3731	10.521
G4MW97	GPI inositol-deacylase OS=Magnaporthe oryzae (strain 70-15 / ATCC MYA-4617 / FGSC 8958) GN=MGG_01844 PE=4 SV=1 - [G4MW97_MAGO7]	1.82	1	2	2	3	1267	1267	140.5	8.83643
G4NIW6	4-coumarate-CoA ligase 1 OS=Magnaporthe oryzae (strain 70-15 / ATCC MYA-4617 / FGSC 8958) GN=MGG_12589 PE=4 SV=1 - [G4NIW6_MAGO7]	16.26	1	1	8	14	578	578	63.7801	7.41553
G4MQE5	Uncharacterized protein OS=Magnaporthe oryzae (strain 70-15 / ATCC MYA-4617 / FGSC 8958) GN=MGG_10893 PE=4 SV=1 - [G4MQE5_MAGO7]	13.01	1	4	4	16	515	515	56.723	7.72314
G4MYR6	Methionine aminopeptidase OS=Magnaporthe oryzae (strain 70-15 / ATCC MYA-4617 / FGSC 8958) GN=MGG_08139 PE=3 SV=1 - [G4MYR6_MAGO7]	17.46	3	4	4	8	378	378	41.73	7.44482
G4N4T3	Anthranilate phosphoribosyltransferase OS=Magnaporthe oryzae (strain P131) GN=OOW_P131scaffold00982g56 PE=4 SV=1 - [L7J5P9_MAGOP]	12.71	1	4	4	10	425	425	46.0664	5.89697
G4MQL4	Uncharacterized protein OS=Magnaporthe oryzae (strain 70-15 / ATCC MYA-4617 / FGSC 8958) GN=MGG_02347 PE=4 SV=1 - [G4MQL4_MAGO7]	7.3	1	1	1	8	137	137	14.186	4.55127
G4MT45	Replication protein A 32 kDa subunit OS=Magnaporthe oryzae (strain P131) GN=OOW_P131scaffold01179g14 PE=4 SV=1 - [L7J110_MAGOP]	17.09	1	3	3	4	275	275	29.135	4.97021
G4N5R5	Uncharacterized protein OS=Magnaporthe oryzae (strain P131) GN=OOW_P131scaffold00095g44 PE=4 SV=1 - [L7JPN5_MAGOP]	7.89	2	2	2	5	228	228	25.1155	4.75439
G4MY95	SNARE domain-containing protein OS=Magnaporthe oryzae (strain 70-15 / ATCC MYA-4617 / FGSC 8958) GN=MGG_08082 PE=4 SV=1 - [G4MY95_MAGO7]	12.89	2	2	2	3	256	256	27.883	4.56396
G4MSM5	Kynurenine formamidase OS=Magnaporthe oryzae (strain 70-15 / ATCC MYA-4617 / FGSC 8958) GN=MGG_15074 PE=3 SV=1 - [G4MSM5_MAGO7]	40.13	2	9	9	19	299	299	32.4642	5.66846
G4MQT9	Mannan endo-1,6-alpha-mannosidase OS=Magnaporthe oryzae (strain 70-15 / ATCC MYA-4617 / FGSC 8958) GN=MGG_04765 PE=3 SV=1 - [G4MQT9_MAGO7]	15.15	2	7	7	14	495	495	54.7299	6.46826
G4MVR9	Lon protease homolog, mitochondrial OS=Magnaporthe oryzae (strain P131) GN=PIM1 PE=3 SV=1 - [L7JAD9_MAGOP]	3.49	1	3	3	3	1119	1119	122.277	5.75732
G4NEH5	Ubiquitin-conjugating enzyme OS=Magnaporthe oryzae (strain 70-15 / ATCC MYA-4617 / FGSC 8958) GN=MGG_00103 PE=3 SV=1 - [G4NEH5_MAGO7]	32.54	1	5	5	7	169	169	18.4044	7.28369
G4MUH6	Uncharacterized protein OS=Magnaporthe oryzae (strain 70-15 / ATCC MYA-4617 / FGSC 8958) GN=MGG_12387 PE=3 SV=1 - [G4MUH6_MAGO7]	18.47	5	4	4	13	222	222	24.5504	9.81787
G4NA63	Uncharacterized protein OS=Magnaporthe oryzae (strain 70-15 / ATCC MYA-4617 / FGSC 8958) GN=MGG_08431 PE=4 SV=1 - [G4NA63_MAGO7]	16.14	1	3	3	12	347	347	37.4799	5.63037
G4MZY8	Ras-like protein OS=Magnaporthe oryzae (strain 70-15 / ATCC MYA-4617 / FGSC 8958) GN=MGG_06154 PE=4 SV=1 - [G4MZY8_MAGO7]	17.76	1	4	4	11	214	214	24.0827	4.98291
G4ML56	UDP-galactopyranose mutase OS=Magnaporthe oryzae (strain 70-15 / ATCC MYA-4617 / FGSC 8958) GN=MGG_06695 PE=4 SV=1 - [G4ML56_MAGO7]	17.61	2	8	8	10	511	511	57.4147	5.78271
G4MTM6	Vacuolar transporter chaperone 2 OS=Magnaporthe oryzae (strain 70-15 / ATCC MYA-4617 / FGSC 8958) GN=MGG_12371 PE=4 SV=1 - [G4MTM6_MAGO7]	12.02	2	8	8	12	815	815	93.1765	6.87354
G4MT24	Bis(5'-nucleosyl)-tetraphosphatase OS=Magnaporthe oryzae (strain P131) GN=OOW_P131scaffold00219g22 PE=4 SV=1 - [L7JMI0_MAGOP]	6.07	1	1	1	2	280	280	30.0234	8.48486
G4N7Z3	Uncharacterized protein OS=Magnaporthe oryzae (strain 70-15 / ATCC MYA-4617 / FGSC 8958) GN=MGG_03506 PE=4 SV=1 - [G4N7Z3_MAGO7]	17.63	1	3	3	11	295	295	32.0529	5.50342
G4MNS6	Beta-lactamase OS=Magnaporthe oryzae (strain 70-15 / ATCC MYA-4617 / FGSC 8958) GN=MGG_13715 PE=4 SV=1 - [G4MNS6_MAGO7]	23.06	2	7	7	8	412	412	44.6458	5.69385
G4N612	Uncharacterized protein OS=Magnaporthe oryzae (strain 70-15 / ATCC MYA-4617 / FGSC 8958) GN=MGG_06620 PE=4 SV=1 - [G4N612_MAGO7]	14.01	2	2	2	3	257	257	28.5783	5.45264
G4N4I2	Dicarboxylic amino acid permease OS=Magnaporthe oryzae (strain P131) GN=OOW_P131scaffold00982g9 PE=4 SV=1 - [L7J5A2_MAGOP]	11.84	1	6	6	8	549	549	60.0128	8.73389
G4N023	Uncharacterized protein OS=Magnaporthe oryzae (strain P131) GN=OOW_P131scaffold00455g49 PE=4 SV=1 - [L7JC80_MAGOP]	6.01	4	2	2	6	316	316	34.5347	6.23975
G4NEG4	Uncharacterized protein OS=Magnaporthe oryzae (strain 70-15 / ATCC MYA-4617 / FGSC 8958) GN=MGG_00112 PE=4 SV=1 - [G4NEG4_MAGO7]	6.88	2	1	1	2	218	218	24.7809	9.5249
G4N797	Catalase OS=Magnaporthe oryzae (strain 70-15 / ATCC MYA-4617 / FGSC 8958) GN=MGG_06442 PE=3 SV=1 - [G4N797_MAGO7]	9.09	2	5	5	6	715	715	78.7295	5.77002
G4MTV9	T-complex protein 1 subunit delta OS=Magnaporthe oryzae (strain 70-15 / ATCC MYA-4617 / FGSC 8958) GN=MGG_01582 PE=3 SV=1 - [G4MTV9_MAGO7]	7.69	1	3	3	4	533	533	56.8184	8.55811
G4MZ32	Vacuolar protein sorting-associated protein 70 OS=Magnaporthe oryzae (strain P131) GN=OOW_P131scaffold00507g15 PE=4 SV=1 - [L7JCN8_MAGOP]	10.45	1	7	7	9	727	727	78.853	5.05908
G4NFM6	Chitin deacetylase OS=Magnaporthe oryzae (strain 70-15 / ATCC MYA-4617 / FGSC 8958) GN=MGG_08774 PE=4 SV=1 - [G4NFM6_MAGO7]	21.47	1	6	6	9	368	368	38.7731	7.15186
G4MY76	Glycerol-3-phosphate O-acyltransferase 1 OS=Magnaporthe oryzae (strain 70-15 / ATCC MYA-4617 / FGSC 8958) GN=MGG_01291 PE=4 SV=1 - [G4MY76_MAGO7]	8.11	1	6	6	8	789	789	88.2363	9.77393
G4ML27	6-phosphofructo-2-kinase/fructose-2, 6-bisphosphatase OS=Magnaporthe oryzae (strain 70-15 / ATCC MYA-4617 / FGSC 8958) GN=MGG_08636 PE=4 SV=1 - [G4ML27_MAGO7]	8.74	2	4	4	8	572	572	64.5728	6.78564
G4MNK7	Protein phosphatase PP2A regulatory subunit B OS=Magnaporthe oryzae (strain 70-15 / ATCC MYA-4617 / FGSC 8958) GN=MGG_05637 PE=3 SV=1 - [G4MNK7_MAGO7]	12.27	2	5	5	7	481	481	53.9907	5.99854
G4NE17	Uncharacterized protein OS=Magnaporthe oryzae (strain 70-15 / ATCC MYA-4617 / FGSC 8958) GN=MGG_00843 PE=4 SV=1 - [G4NE17_MAGO7]	15.36	1	5	5	10	293	293	32.58	4.58936
G4N151	Paraplegin OS=Magnaporthe oryzae (strain 70-15 / ATCC MYA-4617 / FGSC 8958) GN=MGG_07441 PE=3 SV=1 - [G4N151_MAGO7]	3.96	1	4	4	10	1009	1009	110.658	6.68311
G4MVS8	Uncharacterized protein OS=Magnaporthe oryzae (strain 70-15 / ATCC MYA-4617 / FGSC 8958) GN=MGG_15768 PE=4 SV=1 - [G4MVS8_MAGO7]	23.49	2	5	5	13	281	281	29.775	5.74463
G4MQP1	Vacuolar transporter chaperone 4 OS=Magnaporthe oryzae (strain P131) GN=OOW_P131scaffold01069g17 PE=4 SV=1 - [L7J2Y3_MAGOP]	13.46	2	8	9	27	780	780	88.9455	7.04932
G4ML68	DUF866 domain-containing protein OS=Magnaporthe oryzae (strain P131) GN=OOW_P131scaffold00949g8 PE=4 SV=1 - [L7J6C5_MAGOP]	9.42	2	1	1	5	138	138	15.5205	4.56396
G4NF58	Signal recognition particle subunit SRP68 OS=Magnaporthe oryzae (strain 70-15 / ATCC MYA-4617 / FGSC 8958) GN=MGG_04190 PE=3 SV=1 - [G4NF58_MAGO7]	10.41	2	5	5	6	615	615	67.4008	8.33838
G4NCD6	Uncharacterized protein OS=Magnaporthe oryzae (strain 70-15 / ATCC MYA-4617 / FGSC 8958) GN=MGG_00407 PE=4 SV=1 - [G4NCD6_MAGO7]	2.71	2	1	1	8	332	332	33.9938	7.10791
G4MKA6	Elongation factor Tu GTP binding domain-containing protein OS=Magnaporthe oryzae (strain 70-15 / ATCC MYA-4617 / FGSC 8958) GN=MGG_02504 PE=4 SV=1 - [G4MKA6_MAGO7]	1.24	2	1	1	7	563	563	61.2873	5.84619
G4N0D6	Cytochrome b-c1 complex subunit 7 OS=Magnaporthe oryzae PE=2 SV=1 - [D4NXG0_MAGOR]	53.17	1	5	5	22	126	126	14.3467	8.96826
G4NGD2	Pectate lyase OS=Magnaporthe oryzae (strain 70-15 / ATCC MYA-4617 / FGSC 8958) GN=MGG_04348 PE=3 SV=1 - [G4NGD2_MAGO7]	11.15	3	3	3	6	323	323	33.9743	8.80713
G4MNM5	PAP2 domain-containing protein OS=Magnaporthe oryzae (strain P131) GN=OOW_P131scaffold01379g13 PE=4 SV=1 - [L7IUE0_MAGOP]	5.54	2	2	2	4	451	451	48.8989	9.08545
G4MKD1	Vacuolar protein sorting-associated protein 29 OS=Magnaporthe oryzae (strain P131) GN=OOW_P131scaffold00343g18 PE=3 SV=1 - [L7JFQ2_MAGOP]	20.53	2	3	3	10	190	190	20.8367	5.021
Q52CS0	Ubiquitin-like modifier-activating enzyme ATG7 OS=Magnaporthe oryzae (strain 70-15 / ATCC MYA-4617 / FGSC 8958) GN=ATG7 PE=3 SV=2 - [ATG7_MAGO7]	4.48	2	3	3	5	714	714	79.1287	5.89697
G4NA18	Phospho-2-dehydro-3-deoxyheptonate aldolase OS=Magnaporthe oryzae (strain P131) GN=OOW_P131scaffold00943g15 PE=3 SV=1 - [L7J6C1_MAGOP]	9.14	2	4	4	9	383	383	41.2583	6.13818
G4MWC5	CDP-diacylglycerol-inositol 3-phosphatidyltransferase PIS OS=Magnaporthe oryzae (strain 70-15 / ATCC MYA-4617 / FGSC 8958) GN=MGG_08368 PE=3 SV=1 - [G4MWC5_MAGO7]	9.97	1	3	3	8	311	311	34.5709	8.51416
G4ND84	Amino-acid permease inda1 OS=Magnaporthe oryzae (strain 70-15 / ATCC MYA-4617 / FGSC 8958) GN=MGG_00289 PE=4 SV=1 - [G4ND84_MAGO7]	7.28	1	4	4	8	577	577	63.0787	6.69775
G4MWU4	Peptide hydrolase OS=Magnaporthe oryzae (strain 70-15 / ATCC MYA-4617 / FGSC 8958) GN=MGG_15951 PE=3 SV=1 - [G4MWU4_MAGO7]	13.61	1	4	4	7	382	382	42.2662	5.50342
G4N3P2	Uncharacterized protein OS=Magnaporthe oryzae (strain 70-15 / ATCC MYA-4617 / FGSC 8958) GN=MGG_05849 PE=4 SV=1 - [G4N3P2_MAGO7]	14.29	2	3	3	6	273	273	30.6998	9.23193
G4N4F4	Uncharacterized protein OS=Magnaporthe oryzae (strain 70-15 / ATCC MYA-4617 / FGSC 8958) GN=MGG_05106 PE=4 SV=1 - [G4N4F4_MAGO7]	13.3	2	4	4	7	436	436	45.1588	8.1626
G4NEC0	Peptide-N4-(N-acetyl-beta-glucosaminyl)asparagine amidase A OS=Magnaporthe oryzae (strain 70-15 / ATCC MYA-4617 / FGSC 8958) GN=MGG_00799 PE=4 SV=1 - [G4NEC0_MAGO7]	9	2	6	6	12	800	800	87.5398	7.78174
G4MUU7	Uncharacterized protein OS=Magnaporthe oryzae (strain 70-15 / ATCC MYA-4617 / FGSC 8958) GN=MGG_01693 PE=4 SV=1 - [G4MUU7_MAGO7]	7.9	1	3	3	4	405	405	42.729	5.2749
G4MV16	Histone acetyltransferase type B subunit 2 OS=Magnaporthe oryzae (strain P131) GN=OOW_P131scaffold00535g7 PE=4 SV=1 - [L7JA01_MAGOP]	28.21	1	9	9	19	436	436	48.8272	5.03369
G4MKZ9	Uncharacterized protein OS=Magnaporthe oryzae (strain 70-15 / ATCC MYA-4617 / FGSC 8958) GN=MGG_08611 PE=4 SV=1 - [G4MKZ9_MAGO7]	13.12	3	5	5	9	526	526	56.3509	6.84424
G4MKR5	3-oxoacyl-[acyl-carrier-protein] reductase OS=Magnaporthe oryzae (strain P131) GN=OOW_P131scaffold00343g50 PE=4 SV=1 - [L7JG30_MAGOP]	7.36	1	2	2	2	258	258	27.5531	8.41162
G4NE66	Serine/threonine-protein phosphatase OS=Magnaporthe oryzae (strain 70-15 / ATCC MYA-4617 / FGSC 8958) GN=MGG_00149 PE=3 SV=1 - [G4NE66_MAGO7]	7.85	1	2	3	9	522	522	57.0082	6.37939
G4N9Z4	GrpE protein homolog OS=Magnaporthe oryzae (strain 70-15 / ATCC MYA-4617 / FGSC 8958) GN=MGG_03214 PE=3 SV=1 - [G4N9Z4_MAGO7]	14.29	1	3	3	6	252	252	28.0335	9.30518
G4NHF2	Uncharacterized protein OS=Magnaporthe oryzae (strain 70-15 / ATCC MYA-4617 / FGSC 8958) GN=MGG_03863 PE=4 SV=1 - [G4NHF2_MAGO7]	22.58	1	3	3	5	186	186	19.9702	5.18604
G4NBT2	MICOS complex subunit OS=Magnaporthe oryzae (strain 70-15 / ATCC MYA-4617 / FGSC 8958) GN=MGG_00488 PE=4 SV=1 - [G4NBT2_MAGO7]	12.94	2	3	3	6	255	255	27.5763	10.1255
G4MLS2	1-acyl-sn-glycerol-3-phosphate acyltransferase 2 OS=Magnaporthe oryzae (strain 70-15 / ATCC MYA-4617 / FGSC 8958) GN=MGG_05451 PE=4 SV=1 - [G4MLS2_MAGO7]	19.44	2	7	7	11	432	432	49.8963	9.20264
G4N9E2	Aquaporin-9 OS=Magnaporthe oryzae (strain Y34) GN=OOU_Y34scaffold00519g22 PE=3 SV=1 - [L7I6R4_MAGOY]	4	2	1	1	3	325	325	35.8918	5.89697
G4NE83	T-complex protein 1 OS=Magnaporthe oryzae (strain 70-15 / ATCC MYA-4617 / FGSC 8958) GN=MGG_00135 PE=3 SV=1 - [G4NE83_MAGO7]	10.79	1	6	6	6	547	547	59.241	5.18604
G4N506	Phospholipid-transporting ATPase OS=Magnaporthe oryzae (strain 70-15 / ATCC MYA-4617 / FGSC 8958) GN=MGG_12922 PE=3 SV=1 - [G4N506_MAGO7]	10.42	2	11	11	16	1372	1372	153.285	6.771
Q2KHE0	Putative uncharacterized protein OS=Magnaporthe oryzae (strain 70-15 / ATCC MYA-4617 / FGSC 8958) GN=MGCH7_ch7g45 PE=4 SV=1 - [Q2KHE0_MAGO7]	13.69	2	2	2	4	168	168	18.2301	7.76709
G4NAH6	Uncharacterized protein OS=Magnaporthe oryzae (strain P131) GN=OOW_P131scaffold01291g34 PE=4 SV=1 - [L7IYT0_MAGOP]	23.85	2	4	4	9	239	239	25.3121	6.12549
G4MYL1	Deubiquitination-protection protein dph1 OS=Magnaporthe oryzae (strain P131) GN=OOW_P131scaffold00178g8 PE=4 SV=1 - [L7JLV8_MAGOP]	7.89	1	3	3	11	418	418	42.8216	5.04639
G4NEL1	Uncharacterized protein OS=Magnaporthe oryzae (strain 70-15 / ATCC MYA-4617 / FGSC 8958) GN=MGG_00770 PE=4 SV=1 - [G4NEL1_MAGO7]	10.48	2	5	6	9	582	582	65.3923	5.47803
G4N280	Uncharacterized protein OS=Magnaporthe oryzae (strain 70-15 / ATCC MYA-4617 / FGSC 8958) GN=MGG_11021 PE=4 SV=1 - [G4N280_MAGO7]	3.5	1	2	2	4	686	686	78.0246	5.89697
G4N500	NAD dependent epimerase/dehydratase OS=Magnaporthe oryzae (strain 70-15 / ATCC MYA-4617 / FGSC 8958) GN=MGG_05179 PE=4 SV=1 - [G4N500_MAGO7]	16.67	1	1	4	8	276	276	29.5933	9.11475
G4MYK6	Uncharacterized protein OS=Magnaporthe oryzae (strain 70-15 / ATCC MYA-4617 / FGSC 8958) GN=MGG_15667 PE=4 SV=1 - [G4MYK6_MAGO7]	14.56	1	4	4	7	364	364	38.985	7.97217
G4MKS1	RNA binding domain-containing protein OS=Magnaporthe oryzae (strain P131) GN=OOW_P131scaffold00343g59 PE=4 SV=1 - [L7JFT2_MAGOP]	12.79	1	3	3	11	258	258	26.0986	10.0522
G4N7Y4	Nucleoporin POM152 OS=Magnaporthe oryzae (strain P131) GN=OOW_P131scaffold01276g8 PE=4 SV=1 - [L7IYE0_MAGOP]	5.97	1	5	5	7	1274	1274	140.733	8.19189
G4NDD2	Poly(A)+ RNA export protein OS=Magnaporthe oryzae (strain P131) GN=OOW_P131scaffold01094g12 PE=4 SV=1 - [L7J222_MAGOP]	26.82	1	8	8	12	358	358	39.5294	7.98682
G4NFQ8	Exopolygalacturonase OS=Magnaporthe oryzae (strain 70-15 / ATCC MYA-4617 / FGSC 8958) GN=MGG_08752 PE=3 SV=1 - [G4NFQ8_MAGO7]	13.36	2	4	4	7	464	464	51.3942	6.11279
G4MZM9	Uncharacterized protein OS=Magnaporthe oryzae (strain 70-15 / ATCC MYA-4617 / FGSC 8958) GN=MGG_12322 PE=4 SV=1 - [G4MZM9_MAGO7]	2.94	1	2	2	9	781	781	85.0742	9.29053
G4MRX6	Uncharacterized protein OS=Magnaporthe oryzae (strain 70-15 / ATCC MYA-4617 / FGSC 8958) GN=MGG_02463 PE=4 SV=1 - [G4MRX6_MAGO7]	16.92	2	2	2	14	130	130	14.8004	6.40479
G4MMX6	Uncharacterized protein OS=Magnaporthe oryzae (strain 70-15 / ATCC MYA-4617 / FGSC 8958) GN=MGG_06881 PE=4 SV=1 - [G4MMX6_MAGO7]	2.64	2	1	1	3	568	568	62.4626	5.13525
G4MZ41	Uncharacterized protein OS=Magnaporthe oryzae (strain 70-15 / ATCC MYA-4617 / FGSC 8958) GN=MGG_01378 PE=4 SV=1 - [G4MZ41_MAGO7]	6.22	3	8	8	15	1625	1625	176.54	6.50732
G4NE25	Uncharacterized protein OS=Magnaporthe oryzae (strain 70-15 / ATCC MYA-4617 / FGSC 8958) GN=MGG_00837 PE=4 SV=1 - [G4NE25_MAGO7]	14.71	2	7	7	13	612	612	66.1935	6.80029
G4MSG0	Uncharacterized protein OS=Magnaporthe oryzae (strain 70-15 / ATCC MYA-4617 / FGSC 8958) GN=MGG_04528 PE=4 SV=1 - [G4MSG0_MAGO7]	3.13	2	4	4	11	1600	1600	164.629	5.8208
G4MU34	Threonine dehydratase OS=Magnaporthe oryzae (strain P131) GN=OOW_P131scaffold00954g9 PE=3 SV=1 - [L7J840_MAGOP]	13.27	2	6	6	9	618	618	66.8023	7.07861
G4N1D0	Rho-GTPase-activating protein 8 OS=Magnaporthe oryzae (strain P131) GN=OOW_P131scaffold00450g7 PE=4 SV=1 - [L7JCM6_MAGOP]	4.94	1	4	4	7	891	891	99.4204	6.45557
G4N181	D-galacturonic acid reductase OS=Magnaporthe oryzae (strain 70-15 / ATCC MYA-4617 / FGSC 8958) GN=MGG_07463 PE=4 SV=1 - [G4N181_MAGO7]	9.57	1	3	3	4	418	418	45.8448	6.88818
G4MXS0	Uncharacterized protein OS=Magnaporthe oryzae (strain 70-15 / ATCC MYA-4617 / FGSC 8958) GN=MGG_08062 PE=4 SV=1 - [G4MXS0_MAGO7]	20	2	2	2	9	75	75	8.28826	9.31982
G4N855	Uncharacterized protein OS=Magnaporthe oryzae (strain 70-15 / ATCC MYA-4617 / FGSC 8958) GN=MGG_06310 PE=4 SV=1 - [G4N855_MAGO7]	15.32	1	2	2	7	124	124	14.7604	9.81787
G4NC90	Cytochrome c oxidase subunit 6B OS=Magnaporthe oryzae (strain 70-15 / ATCC MYA-4617 / FGSC 8958) GN=MGG_01111 PE=4 SV=1 - [G4NC90_MAGO7]	17.65	1	2	2	5	85	85	10.1768	7.79639
G4N0V2	Poly(3-hydroxybutyrate) depolymerase OS=Magnaporthe oryzae (strain 70-15 / ATCC MYA-4617 / FGSC 8958) GN=MGG_05788 PE=4 SV=1 - [G4N0V2_MAGO7]	14.95	1	3	3	7	321	321	35.1496	7.32764
G4ND02	Uncharacterized protein OS=Magnaporthe oryzae (strain 70-15 / ATCC MYA-4617 / FGSC 8958) GN=MGG_00311 PE=4 SV=1 - [G4ND02_MAGO7]	25.08	1	5	5	10	295	295	32.4161	5.0083
G4MRX0	GTP-binding protein rho2 OS=Magnaporthe oryzae (strain 70-15 / ATCC MYA-4617 / FGSC 8958) GN=MGG_02457 PE=4 SV=1 - [G4MRX0_MAGO7]	24.5	2	4	4	5	200	200	21.9712	5.47803
G4N3K7	TATA-binding protein-associated factor MOT1 OS=Magnaporthe oryzae (strain 70-15 / ATCC MYA-4617 / FGSC 8958) GN=MGG_04989 PE=4 SV=1 - [G4N3K7_MAGO7]	4.17	2	6	6	6	1893	1893	210.043	6.39209
G4N7W0	Adenylyl-sulfate kinase OS=Magnaporthe oryzae (strain P131) GN=OOW_P131scaffold00151g1 PE=3 SV=1 - [L7JPL3_MAGOP]	23.08	1	4	4	7	208	208	23.2781	6.69775
Q2KGG8	Putative uncharacterized protein OS=Magnaporthe oryzae (strain 70-15 / ATCC MYA-4617 / FGSC 8958) GN=MGCH7_ch7g367 PE=4 SV=1 - [Q2KGG8_MAGO7]	12.05	2	3	3	14	249	249	27.1673	8.85107
G4NH70	HET-C protein OS=Magnaporthe oryzae (strain P131) GN=OOW_P131scaffold00303g5 PE=4 SV=1 - [L7JHE7_MAGOP]	7.75	2	4	5	8	748	748	81.4384	6.96143
G4N0T4	Transmembrane 9 superfamily member OS=Magnaporthe oryzae (strain P131) GN=OOW_P131scaffold01326g19 PE=3 SV=1 - [L7IX56_MAGOP]	2.61	2	2	2	6	652	652	72.6313	6.60986
G4N896	Uncharacterized protein OS=Magnaporthe oryzae (strain 70-15 / ATCC MYA-4617 / FGSC 8958) GN=MGG_03464 PE=4 SV=1 - [G4N896_MAGO7]	17.97	1	4	4	8	295	295	33.6038	8.00146
G4NAB2	Epidermal retinal dehydrogenase 2 OS=Magnaporthe oryzae (strain P131) GN=OOW_P131scaffold00256g14 PE=3 SV=1 - [L7JJA5_MAGOP]	18.72	1	6	6	7	358	358	38.8654	6.62451
G4N5K3	Uncharacterized protein OS=Magnaporthe oryzae (strain P131) GN=OOW_P131scaffold00957g16 PE=4 SV=1 - [L7J723_MAGOP]	6.74	1	1	1	7	178	178	19.7148	8.67529
G4MP24	Alpha-1,3-glucosyltransferase OS=Magnaporthe oryzae (strain 70-15 / ATCC MYA-4617 / FGSC 8958) GN=MGG_05686 PE=3 SV=1 - [G4MP24_MAGO7]	2.79	3	2	2	3	502	502	56.8513	9.37842
G4N486	Hexose transporter protein OS=Magnaporthe oryzae (strain P131) GN=OOW_P131scaffold00184g5 PE=3 SV=1 - [L7JLQ5_MAGOP]	5.63	1	3	3	3	533	533	59.2751	5.93506
G4MWD5	Flavonol synthase OS=Magnaporthe oryzae (strain P131) GN=OOW_P131scaffold00028g4 PE=3 SV=1 - [L7JQX8_MAGOP]	9.64	2	4	4	11	363	363	41.0892	6.53662
G5EHN6	Uncharacterized protein OS=Magnaporthe oryzae (strain 70-15 / ATCC MYA-4617 / FGSC 8958) GN=MGCH7_ch7g841 PE=3 SV=1 - [G5EHN6_MAGO7]	4.44	1	6	6	13	1283	1283	141.499	5.96045
G4NDD8	Uncharacterized protein OS=Magnaporthe oryzae (strain P131) GN=OOW_P131scaffold01094g5 PE=4 SV=1 - [L7J3X8_MAGOP]	4.01	1	1	1	2	474	474	50.5214	5.51611
G4NDA8	Uncharacterized protein OS=Magnaporthe oryzae (strain 70-15 / ATCC MYA-4617 / FGSC 8958) GN=MGG_00269 PE=4 SV=1 - [G4NDA8_MAGO7]	6.72	1	1	1	5	134	134	14.377	5.41455
G4MTY5	IdgA domain-containing protein OS=Magnaporthe oryzae (strain 70-15 / ATCC MYA-4617 / FGSC 8958) GN=MGG_14801 PE=4 SV=1 - [G4MTY5_MAGO7]	5.94	3	3	3	8	775	775	82.538	6.78564
A4R1J7	Protein transport protein SEC23 OS=Magnaporthe oryzae (strain 70-15 / ATCC MYA-4617 / FGSC 8958) GN=SEC23 PE=3 SV=1 - [SEC23_MAGO7]	11.17	1	8	8	11	770	770	85.8628	6.23975
G4MP45	Protein transport protein SFT2 OS=Magnaporthe oryzae (strain 70-15 / ATCC MYA-4617 / FGSC 8958) GN=MGG_05708 PE=3 SV=1 - [G4MP45_MAGO7]	7.44	3	1	1	2	215	215	23.631	8.90967
G4N3N5	Mannan endo-1,4-beta-mannosidase 1 OS=Magnaporthe oryzae (strain Y34) GN=OOU_Y34scaffold00282g4 PE=3 SV=1 - [L7IFV1_MAGOY]	7.5	3	2	2	2	400	400	44.3688	5.64307
G4MV41	Microsomal signal peptidase 12kDa subunit OS=Magnaporthe oryzae (strain 70-15 / ATCC MYA-4617 / FGSC 8958) GN=MGG_11330 PE=4 SV=1 - [G4MV41_MAGO7]	20.75	1	2	2	10	106	106	11.6554	5.97314
G4N0N5	Uncharacterized protein OS=Magnaporthe oryzae (strain 70-15 / ATCC MYA-4617 / FGSC 8958) GN=MGG_07761 PE=4 SV=1 - [G4N0N5_MAGO7]	10.62	1	2	2	13	226	226	24.6751	8.36768
G4MSU6	HNRNP arginine N-methyltransferase OS=Magnaporthe oryzae (strain P131) GN=OOW_P131scaffold01358g85 PE=3 SV=1 - [L7IV63_MAGOP]	10.43	1	3	3	4	345	345	39.3987	5.66846
G4NLQ3	Uncharacterized protein OS=Magnaporthe oryzae (strain 70-15 / ATCC MYA-4617 / FGSC 8958) GN=MGG_17942 PE=4 SV=1 - [G4NLQ3_MAGO7]	1.14	3	1	1	5	1142	1142	125.503	6.41748
G4N269	Acetoin(Diacetyl) reductase OS=Magnaporthe oryzae (strain P131) GN=OOW_P131scaffold00036g5 PE=4 SV=1 - [L7JS30_MAGOP]	11.56	1	3	3	4	294	294	30.3355	7.34229
G4N2B5	ATP-dependent bile acid permease OS=Magnaporthe oryzae (strain Y34) GN=OOU_Y34scaffold00745g18 PE=4 SV=1 - [L7HUX6_MAGOY]	2.82	3	4	4	4	1668	1668	184.484	6.75635
G4N7T3	cAMP-dependent protein kinase OS=Magnaporthe oryzae (strain P131) GN=OOW_P131scaffold00505g14 PE=4 SV=1 - [L7JAU3_MAGOP]	4.71	2	2	2	3	531	531	59.8267	7.98682
G4N0X4	Chitin synthase 6 OS=Magnaporthe oryzae GN=CHS6 PE=2 SV=1 - [G4XVC1_MAGOR]	3.04	1	5	5	14	1872	1872	208.059	7.51807
G4N0N7	Alkaline phosphatase OS=Magnaporthe oryzae (strain 70-15 / ATCC MYA-4617 / FGSC 8958) GN=MGG_07763 PE=3 SV=1 - [G4N0N7_MAGO7]	10.65	2	5	5	8	507	507	54.5554	5.32568
G4MTD6	Uncharacterized protein OS=Magnaporthe oryzae (strain P131) GN=OOW_P131scaffold00219g25 PE=4 SV=1 - [L7JL24_MAGOP]	13.93	2	5	5	9	445	445	50.4446	9.51025
G4NFZ9	Uncharacterized protein OS=Magnaporthe oryzae (strain 70-15 / ATCC MYA-4617 / FGSC 8958) GN=MGG_01952 PE=4 SV=1 - [G4NFZ9_MAGO7]	14.38	1	5	5	6	459	459	49.8616	6.02393
G4MQ58	Uncharacterized protein OS=Magnaporthe oryzae (strain 70-15 / ATCC MYA-4617 / FGSC 8958) GN=MGG_02297 PE=4 SV=1 - [G4MQ58_MAGO7]	12.75	1	6	6	8	596	596	65.5037	5.45264
G4MPU2	Uncharacterized protein OS=Magnaporthe oryzae (strain 70-15 / ATCC MYA-4617 / FGSC 8958) GN=MGG_16250 PE=4 SV=1 - [G4MPU2_MAGO7]	15.5	1	3	3	3	400	400	42.7625	6.68311
G4MTM5	MKI67 FHA domain-interacting nucleolar phosphoprotein OS=Magnaporthe oryzae (strain Y34) GN=OOU_Y34scaffold00545g2 PE=4 SV=1 - [L7I4Y8_MAGOY]	3.44	2	1	1	3	378	378	40.9027	9.59814
G4NKG3	Glutamyl-tRNA(Gln) amidotransferase OS=Magnaporthe oryzae (strain 70-15 / ATCC MYA-4617 / FGSC 8958) GN=MGG_15383 PE=4 SV=1 - [G4NKG3_MAGO7]	6.02	3	3	3	3	648	648	68.7901	6.23975
G4NCV8	Uncharacterized protein OS=Magnaporthe oryzae (strain 70-15 / ATCC MYA-4617 / FGSC 8958) GN=MGG_01009 PE=4 SV=1 - [G4NCV8_MAGO7]	20.26	2	3	3	5	153	153	15.2883	4.84326
G4MR61	Uncharacterized protein OS=Magnaporthe oryzae (strain 70-15 / ATCC MYA-4617 / FGSC 8958) GN=MGG_09908 PE=4 SV=1 - [G4MR61_MAGO7]	36.14	1	2	2	5	83	83	9.12712	8.66064
G4MSM0	Calcium-binding mitochondrial carrier protein Aralar1 OS=Magnaporthe oryzae (strain P131) GN=OOW_P131scaffold01192g8 PE=3 SV=1 - [L7J0C8_MAGOP]	8.31	1	6	6	11	710	710	78.5178	8.92432
G4N4B6	Uncharacterized protein OS=Magnaporthe oryzae (strain 70-15 / ATCC MYA-4617 / FGSC 8958) GN=MGG_16721 PE=4 SV=1 - [G4N4B6_MAGO7]	8.75	1	5	5	8	594	594	63.9362	5.08447
G4NHQ2	GPI transamidase component GPI16 OS=Magnaporthe oryzae (strain P131) GN=OOW_P131scaffold00368g9 PE=4 SV=1 - [L7JEI9_MAGOP]	13.68	2	7	7	18	636	636	69.8312	6.13818
G4N1M7	N-terminal acetyltransferase A complex catalytic subunit ard1 OS=Magnaporthe oryzae (strain 70-15 / ATCC MYA-4617 / FGSC 8958) GN=MGG_07496 PE=4 SV=1 - [G4N1M7_MAGO7]	8.7	1	2	2	6	230	230	26.1793	6.45557
G4NDH4	Uncharacterized protein OS=Magnaporthe oryzae (strain 70-15 / ATCC MYA-4617 / FGSC 8958) GN=MGG_00914 PE=4 SV=1 - [G4NDH4_MAGO7]	12.03	2	2	2	7	133	133	14.7657	9.01221
G4N3C0	Uncharacterized protein OS=Magnaporthe oryzae (strain 70-15 / ATCC MYA-4617 / FGSC 8958) GN=MGG_13448 PE=4 SV=1 - [G4N3C0_MAGO7]	29.85	1	3	3	7	201	201	22.1991	6.72705
G4N937	Dolichyl-phosphate mannosyltransferase polypeptide 3 OS=Magnaporthe oryzae (strain 70-15 / ATCC MYA-4617 / FGSC 8958) GN=MGG_10055 PE=4 SV=1 - [G4N937_MAGO7]	28.26	1	2	2	5	92	92	10.3097	5.0083
G4NIR6	Ras-like protein Rab-6A OS=Magnaporthe oryzae (strain 70-15 / ATCC MYA-4617 / FGSC 8958) GN=MGG_04143 PE=4 SV=1 - [G4NIR6_MAGO7]	13.4	2	2	3	8	209	209	23.4358	7.92822
G4NIB8	Uncharacterized protein OS=Magnaporthe oryzae (strain 70-15 / ATCC MYA-4617 / FGSC 8958) GN=MGG_10699 PE=4 SV=1 - [G4NIB8_MAGO7]	5.21	1	1	1	4	326	326	35.7879	5.23682
G4N801	Uncharacterized protein OS=Magnaporthe oryzae (strain 70-15 / ATCC MYA-4617 / FGSC 8958) GN=MGG_17084 PE=4 SV=1 - [G4N801_MAGO7]	0.84	1	1	1	6	716	716	79.9319	8.32373
G4MVQ3	Chaperone dnaJ OS=Magnaporthe oryzae (strain 70-15 / ATCC MYA-4617 / FGSC 8958) GN=MGG_11144 PE=3 SV=1 - [G4MVQ3_MAGO7]	2.76	2	1	1	1	543	543	57.0104	9.39307
G4N2Y8	Uncharacterized protein OS=Magnaporthe oryzae (strain 70-15 / ATCC MYA-4617 / FGSC 8958) GN=MGG_07629 PE=4 SV=1 - [G4N2Y8_MAGO7]	5.07	2	3	3	5	631	631	69.2427	6.11279
G4MMC5	Delta(12) fatty acid desaturase OS=Magnaporthe oryzae (strain 70-15 / ATCC MYA-4617 / FGSC 8958) GN=MGG_01985 PE=4 SV=1 - [G4MMC5_MAGO7]	12.11	3	5	5	8	487	487	54.1984	8.38232
G4NFW7	Short-chain specific acyl-CoA dehydrogenase OS=Magnaporthe oryzae (strain 70-15 / ATCC MYA-4617 / FGSC 8958) GN=MGG_08690 PE=3 SV=1 - [G4NFW7_MAGO7]	11.46	2	5	5	6	445	445	48.3456	7.76709
G4MLM0	Uncharacterized protein OS=Magnaporthe oryzae (strain 70-15 / ATCC MYA-4617 / FGSC 8958) GN=MGG_06751 PE=4 SV=1 - [G4MLM0_MAGO7]	10.27	1	2	2	5	224	224	24.6547	8.70459
G4N8I6	Vacuolar protein sorting-associated protein 21 OS=Magnaporthe oryzae (strain 70-15 / ATCC MYA-4617 / FGSC 8958) GN=MGG_06241 PE=4 SV=1 - [G4N8I6_MAGO7]	17.23	1	3	4	7	238	238	24.7314	4.89404
G4MSK7	Arf GTPase-activating protein OS=Magnaporthe oryzae (strain 70-15 / ATCC MYA-4617 / FGSC 8958) GN=MGG_01472 PE=4 SV=1 - [G4MSK7_MAGO7]	2.65	1	1	1	8	490	490	51.9364	9.02686
G4MYC2	Ureidoglycolate hydrolase OS=Magnaporthe oryzae (strain P131) GN=OOW_P131scaffold00067g5 PE=4 SV=1 - [L7JQ50_MAGOP]	8.37	1	3	3	8	263	263	27.9411	5.75732
G4MS97	Nonhistone chromosomal protein 6B OS=Magnaporthe oryzae PE=2 SV=1 - [D4NXD0_MAGOR]	12.87	1	1	1	6	101	101	11.3017	9.5542
G4N5J6	Got1 family protein OS=Magnaporthe oryzae (strain 70-15 / ATCC MYA-4617 / FGSC 8958) GN=MGG_13205 PE=4 SV=1 - [G4N5J6_MAGO7]	7.19	1	1	1	3	139	139	15.0682	9.89111
G4NER3	Uncharacterized protein OS=Magnaporthe oryzae (strain 70-15 / ATCC MYA-4617 / FGSC 8958) GN=MGG_17542 PE=4 SV=1 - [G4NER3_MAGO7]	10.54	1	3	3	3	408	408	42.8629	5.04639
G4NDL7	NADP-dependent alcohol dehydrogenase 6 OS=Magnaporthe oryzae (strain P131) GN=OOW_P131scaffold00057g4 PE=4 SV=1 - [L7JQD1_MAGOP]	19.72	1	5	5	13	360	360	39.0264	6.32861
G4NBV2	Uncharacterized protein OS=Magnaporthe oryzae (strain 70-15 / ATCC MYA-4617 / FGSC 8958) GN=MGG_10792 PE=4 SV=1 - [G4NBV2_MAGO7]	13.77	1	4	4	5	443	443	48.2778	6.40479
G4NED3	Eukaryotic translation initiation factor 2 beta subunit OS=Magnaporthe oryzae (strain 70-15 / ATCC MYA-4617 / FGSC 8958) GN=MGG_00789 PE=4 SV=1 - [G4NED3_MAGO7]	15.63	2	4	4	6	320	320	35.7261	6.91748
G4N8U4	Epoxide hydrolase 1 OS=Magnaporthe oryzae (strain 70-15 / ATCC MYA-4617 / FGSC 8958) GN=MGG_14882 PE=4 SV=1 - [G4N8U4_MAGO7]	10.66	1	4	4	7	422	422	47.1075	5.8208
G4MT96	Uncharacterized protein OS=Magnaporthe oryzae (strain 70-15 / ATCC MYA-4617 / FGSC 8958) GN=MGG_04655 PE=4 SV=1 - [G4MT96_MAGO7]	9.25	1	2	2	3	465	465	49.6413	6.72705
G5EHV0	Uncharacterized protein OS=Magnaporthe oryzae (strain 70-15 / ATCC MYA-4617 / FGSC 8958) GN=MGCH7_ch7g71 PE=4 SV=1 - [G5EHV0_MAGO7]	25.67	1	3	3	6	187	187	20.082	4.94482
G4MS36	Glyoxalase OS=Magnaporthe oryzae (strain 70-15 / ATCC MYA-4617 / FGSC 8958) GN=MGG_10506 PE=4 SV=1 - [G4MS36_MAGO7]	19.57	1	5	5	6	327	327	37.8981	5.90967
G4MV24	Uncharacterized protein OS=Magnaporthe oryzae (strain 70-15 / ATCC MYA-4617 / FGSC 8958) GN=MGG_07330 PE=4 SV=1 - [G4MV24_MAGO7]	7.87	1	1	1	4	178	178	19.1554	4.81787
G4N885	Isoflavone reductase OS=Magnaporthe oryzae (strain 70-15 / ATCC MYA-4617 / FGSC 8958) GN=MGG_03473 PE=4 SV=1 - [G4N885_MAGO7]	22.71	1	6	6	7	317	317	34.3077	5.21143
G4MMQ5	Uncharacterized protein OS=Magnaporthe oryzae (strain 70-15 / ATCC MYA-4617 / FGSC 8958) GN=MGG_16408 PE=4 SV=1 - [G4MMQ5_MAGO7]	29.37	1	3	3	7	143	143	15.5066	6.50732
G4NGV6	L-asparaginase OS=Magnaporthe oryzae (strain P131) GN=OOW_P131scaffold00134g25 PE=4 SV=1 - [L7JNK4_MAGOP]	1.48	1	1	1	4	540	540	57.9135	6.52197
G4N9C2	Uncharacterized protein (Fragment) OS=Magnaporthe oryzae (strain P131) GN=OOW_P131scaffold00313g2 PE=4 SV=1 - [L7JI96_MAGOP]	3.64	3	2	2	2	659	659	62.9056	6.97607
G4MTW2	Peripheral-type benzodiazepine receptor OS=Magnaporthe oryzae PE=2 SV=1 - [D4NXJ4_MAGOR]	8.51	2	1	1	4	188	188	20.5307	9.33447
G5EHA3	Uncharacterized protein OS=Magnaporthe oryzae (strain 70-15 / ATCC MYA-4617 / FGSC 8958) GN=MGCH7_ch7g325 PE=4 SV=1 - [G5EHA3_MAGO7]	12.7	1	1	1	7	63	63	7.18462	9.70068
G4NDE1	ATP-binding cassette sub-family A member 8-A OS=Magnaporthe oryzae (strain P131) GN=OOW_P131scaffold01094g3 PE=4 SV=1 - [L7J249_MAGOP]	3.75	3	6	6	7	1654	1654	180.094	8.82178
G4NFF4	Uncharacterized protein OS=Magnaporthe oryzae (strain 70-15 / ATCC MYA-4617 / FGSC 8958) GN=MGG_04263 PE=4 SV=1 - [G4NFF4_MAGO7]	16.57	3	3	3	11	169	169	18.318	5.09717
G4MLV2	26S protease regulatory subunit 4 OS=Magnaporthe oryzae (strain P131) GN=OOW_P131scaffold00295g3 PE=3 SV=1 - [L7JI27_MAGOP]	10.24	1	4	4	6	459	459	50.8932	5.88428
G4MT20	Ferrochelatase OS=Magnaporthe oryzae (strain P131) GN=OOW_P131scaffold00219g19 PE=3 SV=1 - [L7JKK8_MAGOP]	9.13	1	3	3	3	438	438	48.1232	8.52881
G4N731	Glycerol uptake protein 1 OS=Magnaporthe oryzae (strain 70-15 / ATCC MYA-4617 / FGSC 8958) GN=MGG_03628 PE=3 SV=1 - [G4N731_MAGO7]	10.29	3	5	5	7	622	622	71.5573	9.37842
G4NCK3	Uncharacterized protein OS=Magnaporthe oryzae (strain 70-15 / ATCC MYA-4617 / FGSC 8958) GN=MGG_01055 PE=4 SV=1 - [G4NCK3_MAGO7]	20.18	1	2	2	3	114	114	11.9917	4.28467
A4QUA4	Long chronological lifespan protein 2 OS=Magnaporthe oryzae (strain 70-15 / ATCC MYA-4617 / FGSC 8958) GN=LCL2 PE=3 SV=1 - [LCL2_MAGO7]	16.8	1	2	2	5	125	125	13.4195	6.50732
G4MRM5	Oxidoreductase OS=Magnaporthe oryzae (strain P131) GN=OOW_P131scaffold00889g17 PE=4 SV=1 - [L7J740_MAGOP]	5.14	2	1	1	1	292	292	31.2559	5.70654
G4MLU3	Sodium/nucleoside cotransporter 1 OS=Magnaporthe oryzae (strain 70-15 / ATCC MYA-4617 / FGSC 8958) GN=MGG_05467 PE=4 SV=1 - [G4MLU3_MAGO7]	5.44	1	2	2	6	662	662	71.2533	8.04541
G4MS58	Alcohol dehydrogenase 1 OS=Magnaporthe oryzae (strain P131) GN=OOW_P131scaffold01138g48 PE=4 SV=1 - [L7J279_MAGOP]	10.32	1	3	3	7	339	339	35.621	6.60986
G4NC16	Mitochondrial 2-oxoglutarate/malate carrier protein OS=Magnaporthe oryzae (strain 70-15 / ATCC MYA-4617 / FGSC 8958) GN=MGG_17450 PE=3 SV=1 - [G4NC16_MAGO7]	9.82	2	3	3	3	336	336	35.8267	10.0522
G4N5E2	Chaperone protein dnaJ 3 OS=Magnaporthe oryzae (strain Y34) GN=OOU_Y34scaffold00711g25 PE=3 SV=1 - [L7HWT8_MAGOY]	14.32	2	6	6	10	440	440	47.8766	5.40186
G4N583	DNA-directed RNA polymerase I OS=Magnaporthe oryzae (strain 70-15 / ATCC MYA-4617 / FGSC 8958) GN=MGG_06083 PE=3 SV=1 - [G4N583_MAGO7]	6.52	2	1	1	1	230	230	25.8575	9.01221
G4MYZ9	Uncharacterized protein OS=Magnaporthe oryzae (strain 70-15 / ATCC MYA-4617 / FGSC 8958) GN=MGG_15528 PE=4 SV=1 - [G4MYZ9_MAGO7]	4.72	1	2	2	2	508	508	55.2153	5.05908
G4NHJ3	NADH oxidase OS=Magnaporthe oryzae (strain 70-15 / ATCC MYA-4617 / FGSC 8958) GN=MGG_03823 PE=4 SV=1 - [G4NHJ3_MAGO7]	14.11	1	4	4	5	418	418	45.571	5.64307
G4MV31	Ribosomal protein L28e OS=Magnaporthe oryzae (strain 70-15 / ATCC MYA-4617 / FGSC 8958) GN=MGG_08834 PE=4 SV=1 - [G4MV31_MAGO7]	23.18	1	4	4	7	151	151	16.3586	10.6528
G4N556	Ca2+/H+ antiporter OS=Magnaporthe oryzae (strain 70-15 / ATCC MYA-4617 / FGSC 8958) GN=MGG_13224 PE=3 SV=1 - [G4N556_MAGO7]	3.76	3	1	1	4	346	346	37.1529	5.22412
G4N9Z7	Uncharacterized protein OS=Magnaporthe oryzae (strain 70-15 / ATCC MYA-4617 / FGSC 8958) GN=MGG_09782 PE=4 SV=1 - [G4N9Z7_MAGO7]	15.78	1	6	6	7	431	431	45.6227	6.43018
G4N4D6	Vacuolar protein sorting-associated protein 35 OS=Magnaporthe oryzae (strain P131) GN=OOW_P131scaffold00347g9 PE=3 SV=1 - [L7JF86_MAGOP]	7.46	1	7	7	9	898	898	101.312	5.42725
A0A151V4P6	Uncharacterized protein OS=Magnaporthe oryzae (strain 70-15 / ATCC MYA-4617 / FGSC 8958) GN=MGG_10235 PE=4 SV=1 - [A0A151V4P6_MAGO7]	6.37	2	2	2	5	455	455	50.214	7.21045
G4MUF9	Uncharacterized protein OS=Magnaporthe oryzae (strain 70-15 / ATCC MYA-4617 / FGSC 8958) GN=MGG_01667 PE=4 SV=1 - [G4MUF9_MAGO7]	22.83	1	3	3	10	92	92	10.7473	9.5835
G4MWX4	Uncharacterized protein OS=Magnaporthe oryzae (strain 70-15 / ATCC MYA-4617 / FGSC 8958) GN=MGG_01186 PE=4 SV=1 - [G4MWX4_MAGO7]	11.89	2	2	2	3	227	227	25.7009	6.29053
G5EH00	Uncharacterized protein OS=Magnaporthe oryzae (strain 70-15 / ATCC MYA-4617 / FGSC 8958) GN=MGCH7_ch7g656 PE=4 SV=1 - [G5EH00_MAGO7]	7.14	1	1	1	3	154	154	17.3843	9.70068
G4NBS9	Superoxide dismutase OS=Magnaporthe oryzae (strain P131) GN=OOW_P131scaffold00224g13 PE=4 SV=1 - [L7JM54_MAGOP]	9.12	1	2	2	2	307	307	35.086	8.82178
G4MXS3	WD domain-containing protein OS=Magnaporthe oryzae (strain 70-15 / ATCC MYA-4617 / FGSC 8958) GN=MGG_08065 PE=4 SV=1 - [G4MXS3_MAGO7]	3.96	3	2	2	4	454	454	49.0143	5.5415
G4MT85	Eukaryotic translation initiation factor 4E-1 OS=Magnaporthe oryzae (strain P131) GN=OOW_P131scaffold01358g115 PE=3 SV=1 - [L7IV94_MAGOP]	23.36	1	5	5	11	244	244	27.2818	6.7417
G4NCD5	RCC1 domain-containing protein OS=Magnaporthe oryzae (strain P131) GN=OOW_P131scaffold01024g5 PE=4 SV=1 - [L7J4B2_MAGOP]	14.8	1	8	8	19	669	669	70.6101	7.7085
G4NGU0	Translation initiation factor eIF-2B subunit delta OS=Magnaporthe oryzae (strain P131) GN=OOW_P131scaffold01683g4 PE=3 SV=1 - [L7IRF4_MAGOP]	4.89	2	2	2	4	470	470	49.1336	7.57666
G4MTM2	Uncharacterized protein OS=Magnaporthe oryzae (strain 70-15 / ATCC MYA-4617 / FGSC 8958) GN=MGG_07183 PE=4 SV=1 - [G4MTM2_MAGO7]	6.86	1	3	3	3	554	554	61.395	5.19873
G4NFW1	NAD-binding Rossmann fold oxidoreductase OS=Magnaporthe oryzae (strain 70-15 / ATCC MYA-4617 / FGSC 8958) GN=MGG_08695 PE=4 SV=1 - [G4NFW1_MAGO7]	17.16	1	4	4	4	437	437	48.5171	6.53662
G4N9W7	Zinc finger protein ZPR1 OS=Magnaporthe oryzae (strain 70-15 / ATCC MYA-4617 / FGSC 8958) GN=MGG_03238 PE=4 SV=1 - [G4N9W7_MAGO7]	5.49	1	2	2	3	510	510	55.5051	4.57666
G4NEB5	Uncharacterized protein OS=Magnaporthe oryzae (strain 70-15 / ATCC MYA-4617 / FGSC 8958) GN=MGG_00802 PE=4 SV=1 - [G4NEB5_MAGO7]	8.24	1	2	2	3	376	376	38.6465	9.72998
A4RHN5	Phosphatidylethanolamine N-methyltransferase OS=Magnaporthe oryzae (strain Y34) GN=OOU_Y34scaffold00707g1 PE=3 SV=1 - [L7HYP8_MAGOY]	3.83	2	3	3	4	939	939	105.541	6.90283
G4N7S6	Histone acetyltransferase type B catalytic subunit OS=Magnaporthe oryzae (strain P131) GN=OOW_P131scaffold00126g21 PE=4 SV=1 - [L7JQ97_MAGOP]	9.4	1	4	4	5	468	468	53.9546	5.42725
G4NE78	Uncharacterized protein OS=Magnaporthe oryzae (strain 70-15 / ATCC MYA-4617 / FGSC 8958) GN=MGG_00140 PE=4 SV=1 - [G4NE78_MAGO7]	4.39	1	1	1	1	319	319	32.6996	8.36768
G4NEP4	Uncharacterized protein OS=Magnaporthe oryzae (strain 70-15 / ATCC MYA-4617 / FGSC 8958) GN=MGG_00742 PE=4 SV=1 - [G4NEP4_MAGO7]	12.36	2	3	3	3	275	275	28.3716	7.72314
G4MWG7	Catechol 1,2-dioxygenase 1 OS=Magnaporthe oryzae (strain 70-15 / ATCC MYA-4617 / FGSC 8958) GN=MGG_08983 PE=4 SV=1 - [G4MWG7_MAGO7]	24.76	1	5	5	6	319	319	36.1307	5.65576
G4MLT8	Tetratricopeptide repeat domain-containing protein OS=Magnaporthe oryzae (strain 70-15 / ATCC MYA-4617 / FGSC 8958) GN=MGG_05462 PE=4 SV=1 - [G4MLT8_MAGO7]	32.83	1	5	5	10	198	198	22.0074	6.81494
G4NGB6	Cellulase OS=Magnaporthe oryzae (strain 70-15 / ATCC MYA-4617 / FGSC 8958) GN=MGG_10423 PE=3 SV=1 - [G4NGB6_MAGO7]	7.01	2	2	2	3	471	471	51.7405	5.50342
G4NAP1	Endo-1,4-beta-xylanase D OS=Magnaporthe oryzae (strain P131) GN=OOW_P131scaffold01216g8 PE=3 SV=1 - [L7IY31_MAGOP]	6.8	1	2	2	2	456	456	48.9443	4.71631
G4N829	60S ribosomal protein L29 OS=Magnaporthe oryzae (strain 70-15 / ATCC MYA-4617 / FGSC 8958) GN=MGG_06333 PE=4 SV=1 - [G4N829_MAGO7]	12.31	1	1	1	4	65	65	7.46002	11.4292
G4NAQ9	Aflatoxin B1 aldehyde reductase member 3 OS=Magnaporthe oryzae (strain P131) GN=OOW_P131scaffold01281g2 PE=4 SV=1 - [L7IXA7_MAGOP]	20.72	1	5	5	5	333	333	36.3036	6.12549
G4N847	Uncharacterized protein OS=Magnaporthe oryzae (strain 70-15 / ATCC MYA-4617 / FGSC 8958) GN=MGG_06318 PE=4 SV=1 - [G4N847_MAGO7]	1.83	2	2	2	4	1200	1200	128.867	7.81104
G4MZE4	Pre-mRNA-splicing factor brr2 OS=Magnaporthe oryzae (strain P131) GN=OOW_P131scaffold01166g12 PE=4 SV=1 - [L7J095_MAGOP]	4.74	1	10	10	13	2216	2216	250.52	5.14795
G4MPC1	Beta-lactamase family protein OS=Magnaporthe oryzae (strain P131) GN=OOW_P131scaffold00255g21 PE=4 SV=1 - [L7JKC8_MAGOP]	8.69	2	2	2	2	426	426	46.026	5.2749
G4MZ85	Aromatic amino acid aminotransferase OS=Magnaporthe oryzae (strain 70-15 / ATCC MYA-4617 / FGSC 8958) GN=MGG_08189 PE=4 SV=1 - [G4MZ85_MAGO7]	4.87	2	3	3	3	636	636	71.3769	6.50732
Q2KH28	Neutral protease 2 homolog MGG_10927 OS=Magnaporthe oryzae (strain 70-15 / ATCC MYA-4617 / FGSC 8958) GN=MGCH7_ch7g157 PE=3 SV=1 - [NPIIA_MAGO7]	16.43	1	3	3	6	347	347	36.838	6.75635
G4MN98	Glyoxalase/bleomycin resistance protein/dioxygenase OS=Magnaporthe oryzae (strain 70-15 / ATCC MYA-4617 / FGSC 8958) GN=MGG_02069 PE=4 SV=1 - [G4MN98_MAGO7]	16.79	1	2	2	4	131	131	13.5225	6.23975
G4MSR2	MOSC domain-containing protein OS=Magnaporthe oryzae (strain 70-15 / ATCC MYA-4617 / FGSC 8958) GN=MGG_07097 PE=4 SV=1 - [G4MSR2_MAGO7]	8.81	2	3	3	5	454	454	51.2887	7.45947
G4N521	Acetoacetate-CoA ligase OS=Magnaporthe oryzae (strain 70-15 / ATCC MYA-4617 / FGSC 8958) GN=MGG_05196 PE=4 SV=1 - [G4N521_MAGO7]	8.64	2	5	5	8	718	718	77.5115	6.03662
G4MY33	ThiJ/PfpI family protein OS=Magnaporthe oryzae (strain P131) GN=OOW_P131scaffold00327g6 PE=4 SV=1 - [L7JGC6_MAGOP]	7.14	2	2	2	4	252	252	26.7754	4.93213
A4RCX7	Histone H3 OS=Magnaporthe oryzae (strain 70-15 / ATCC MYA-4617 / FGSC 8958) GN=HHT1 PE=3 SV=1 - [H3_MAGO7]	14.71	2	3	3	12	136	136	15.3825	11.1509
G4MKU0	Uncharacterized protein OS=Magnaporthe oryzae (strain P131) GN=OOW_P131scaffold00074g21 PE=4 SV=1 - [L7JRJ7_MAGOP]	3.27	2	1	1	4	306	306	33.6671	9.96436
G4N7J4	Nucleolysin TIA-1 OS=Magnaporthe oryzae (strain P131) GN=OOW_P131scaffold00402g3 PE=4 SV=1 - [L7JDM3_MAGOP]	9.81	1	4	4	4	479	479	51.4764	6.85889
G4N8A6	Uncharacterized protein OS=Magnaporthe oryzae (strain 70-15 / ATCC MYA-4617 / FGSC 8958) GN=MGG_03455 PE=4 SV=1 - [G4N8A6_MAGO7]	5.57	1	3	3	3	646	646	72.3998	5.74463
G4N5Y7	Voltage-gated potassium channel subunit beta-3 channel subunit beta-3 OS=Magnaporthe oryzae (strain P131) GN=OOW_P131scaffold01296g1 PE=4 SV=1 - [L7IYG2_MAGOP]	15.58	1	6	6	11	353	353	39.5833	6.66846
G4NGL1	ER membrane protein OS=Magnaporthe oryzae (strain P131) GN=OOW_P131scaffold01349g7 PE=4 SV=1 - [L7IU84_MAGOP]	11.18	1	3	4	8	456	456	50.1816	5.35107
G4MV70	Eukaryotic translation initiation factor 5 OS=Magnaporthe oryzae (strain P131) GN=OOW_P131scaffold00399g11 PE=4 SV=1 - [L7JES8_MAGOP]	15.35	1	8	8	14	430	430	47.6973	5.98584
G4N796	1,2-dihydroxy-3-keto-5-methylthiopentene dioxygenase OS=Magnaporthe oryzae (strain 70-15 / ATCC MYA-4617 / FGSC 8958) GN=ADI1 PE=3 SV=1 - [G4N796_MAGO7]	19.21	2	3	3	9	177	177	20.6481	5.26221
G5EHY4	Uncharacterized protein OS=Magnaporthe oryzae (strain 70-15 / ATCC MYA-4617 / FGSC 8958) GN=MGCH7_ch7g1096 PE=4 SV=1 - [G5EHY4_MAGO7]	10.96	1	2	2	6	228	228	24.5722	5.88428
G4MPE3	rRNA 2'-O-methyltransferase fibrillarin OS=Magnaporthe oryzae (strain P131) GN=OOW_P131scaffold00255g41 PE=3 SV=1 - [L7JKF0_MAGOP]	17.13	1	5	5	9	321	321	33.7654	9.92041
G4NHW2	3-oxoacyl-[acyl-carrier-protein] reductase OS=Magnaporthe oryzae (strain 70-15 / ATCC MYA-4617 / FGSC 8958) GN=MGG_14948 PE=4 SV=1 - [G4NHW2_MAGO7]	13.68	2	3	3	4	285	285	30.1355	5.69385
G4N5Y5	Uncharacterized protein OS=Magnaporthe oryzae (strain 70-15 / ATCC MYA-4617 / FGSC 8958) GN=MGG_03121 PE=4 SV=1 - [G4N5Y5_MAGO7]	4.57	2	3	3	3	766	766	86.1853	6.80029
G4N0T1	Uncharacterized protein OS=Magnaporthe oryzae (strain 70-15 / ATCC MYA-4617 / FGSC 8958) GN=MGG_07431 PE=4 SV=1 - [G4N0T1_MAGO7]	4.29	1	1	1	2	303	303	33.8064	5.17334
G4NI09	Uncharacterized protein OS=Magnaporthe oryzae (strain 70-15 / ATCC MYA-4617 / FGSC 8958) GN=MGG_09377 PE=4 SV=1 - [G4NI09_MAGO7]	28.72	1	4	4	9	195	195	20.9607	5.60498
G4NFU6	Uncharacterized protein OS=Magnaporthe oryzae (strain 70-15 / ATCC MYA-4617 / FGSC 8958) GN=MGG_14118 PE=4 SV=1 - [G4NFU6_MAGO7]	3.08	2	2	2	7	909	909	101.621	6.78564
G4ML86	Uncharacterized protein OS=Magnaporthe oryzae (strain P131) GN=OOW_P131scaffold00177g12 PE=4 SV=1 - [L7JLY5_MAGOP]	6.67	2	1	1	7	240	240	26.1295	9.08545
G4N371	Uncharacterized protein OS=Magnaporthe oryzae (strain 70-15 / ATCC MYA-4617 / FGSC 8958) GN=MGG_15118 PE=4 SV=1 - [G4N371_MAGO7]	20.93	3	3	3	9	86	86	10.2981	8.45557
G4MY45	2,4-dihydroxyhept-2-ene-1,7-dioic acid aldolase OS=Magnaporthe oryzae (strain 70-15 / ATCC MYA-4617 / FGSC 8958) GN=MGG_01270 PE=4 SV=1 - [G4MY45_MAGO7]	11.85	2	3	3	15	270	270	28.7376	5.90967
G4N1E0	Atypical/PIKK/TRRAP protein kinase OS=Magnaporthe oryzae (strain 70-15 / ATCC MYA-4617 / FGSC 8958) GN=MGG_09523 PE=3 SV=1 - [G4N1E0_MAGO7]	1.86	2	7	7	7	3861	3861	440.442	7.51807
G5EI06	2-deoxy-D-gluconate 3-dehydrogenase OS=Magnaporthe oryzae (strain 70-15 / ATCC MYA-4617 / FGSC 8958) GN=MGCH7_ch7g677 PE=4 SV=1 - [G5EI06_MAGO7]	20.38	1	5	5	10	260	260	27.3981	7.12256
G4NBH9	Ribulose-phosphate 3-epimerase OS=Magnaporthe oryzae (strain P131) GN=OOW_P131scaffold01046g33 PE=3 SV=1 - [L7J4M3_MAGOP]	4.78	1	1	1	14	251	251	26.7525	5.35107
G4NGG7	Uncharacterized protein OS=Magnaporthe oryzae (strain 70-15 / ATCC MYA-4617 / FGSC 8958) GN=MGG_04319 PE=4 SV=1 - [G4NGG7_MAGO7]	27.12	1	2	2	5	177	177	16.7966	5.14795
G4MV92	GTP-binding protein ypt3 OS=Magnaporthe oryzae (strain 70-15 / ATCC MYA-4617 / FGSC 8958) GN=MGG_01724 PE=4 SV=1 - [G4MV92_MAGO7]	6.36	1	1	2	7	346	346	36.7331	7.73779
G4MKY5	Formyl-coenzyme A transferase OS=Magnaporthe oryzae (strain 70-15 / ATCC MYA-4617 / FGSC 8958) GN=MGG_13032 PE=4 SV=1 - [G4MKY5_MAGO7]	8.26	2	3	3	5	448	448	48.5708	8.08936
G4N3I9	Very-long-chain (3R)-3-hydroxyacyl-CoA dehydratase OS=Magnaporthe oryzae (strain 70-15 / ATCC MYA-4617 / FGSC 8958) GN=MGG_04972 PE=3 SV=1 - [G4N3I9_MAGO7]	4.78	1	1	1	1	230	230	25.4394	9.64209
G4N2J5	Uncharacterized protein OS=Magnaporthe oryzae (strain 70-15 / ATCC MYA-4617 / FGSC 8958) GN=MGG_07594 PE=4 SV=1 - [G4N2J5_MAGO7]	7.81	1	2	2	3	269	269	28.8626	5.37646
G4N5A6	tRNA 2'-phosphotransferase 1 OS=Magnaporthe oryzae (strain P131) GN=OOW_P131scaffold01012g6 PE=4 SV=1 - [L7J4J8_MAGOP]	12.33	2	3	3	3	300	300	31.5623	9.5249
G4NJV9	ADP-ribose pyrophosphatase OS=Magnaporthe oryzae (strain 70-15 / ATCC MYA-4617 / FGSC 8958) GN=MGG_15034 PE=4 SV=1 - [G4NJV9_MAGO7]	20	2	3	3	4	235	235	26.1235	6.37939
G4N0Z0	Mitogen-activated protein kinase OS=Magnaporthe oryzae (strain P131) GN=OOW_P131scaffold00142g16 PE=3 SV=1 - [L7JMY4_MAGOP]	7.87	1	3	3	5	356	356	41.277	7.12256
G4NC29	Uncharacterized protein OS=Magnaporthe oryzae (strain 70-15 / ATCC MYA-4617 / FGSC 8958) GN=MGG_00451 PE=4 SV=1 - [G4NC29_MAGO7]	3.13	1	1	1	1	319	319	36.1014	6.17627
G4MYV1	Uncharacterized protein OS=Magnaporthe oryzae (strain 70-15 / ATCC MYA-4617 / FGSC 8958) GN=MGG_15831 PE=4 SV=1 - [G4MYV1_MAGO7]	32.24	1	6	6	14	245	245	26.8826	5.05908
G4MSN5	Golgi apyrase OS=Magnaporthe oryzae (strain P131) GN=OOW_P131scaffold01192g23 PE=3 SV=1 - [L7J0E3_MAGOP]	3.85	1	2	2	4	702	702	77.608	8.08936
G5EI47	Uncharacterized protein OS=Magnaporthe oryzae (strain 70-15 / ATCC MYA-4617 / FGSC 8958) GN=MGCH7_ch7g207 PE=4 SV=1 - [G5EI47_MAGO7]	13.61	2	5	6	8	485	485	53.8584	5.40186
G4N2P2	Uncharacterized protein OS=Magnaporthe oryzae (strain 70-15 / ATCC MYA-4617 / FGSC 8958) GN=MGG_04873 PE=4 SV=1 - [G4N2P2_MAGO7]	53.72	2	4	4	9	121	121	14.1387	6.26514
G4MSG9	Uncharacterized protein OS=Magnaporthe oryzae (strain 70-15 / ATCC MYA-4617 / FGSC 8958) GN=MGG_01442 PE=4 SV=1 - [G4MSG9_MAGO7]	9.76	2	2	2	3	205	205	22.8661	4.86865
G4MVM0	Uncharacterized protein OS=Magnaporthe oryzae (strain P131) GN=OOW_P131scaffold01214g36 PE=4 SV=1 - [L7IZB5_MAGOP]	2.96	1	1	1	3	405	405	45.0586	10.1548
G4MU54	Uncharacterized protein OS=Magnaporthe oryzae (strain 70-15 / ATCC MYA-4617 / FGSC 8958) GN=MGG_15888 PE=3 SV=1 - [G4MU54_MAGO7]	4.8	1	2	2	4	521	521	56.119	5.56689
A4R2N5	Golgi apparatus membrane protein TVP18 OS=Magnaporthe oryzae (strain 70-15 / ATCC MYA-4617 / FGSC 8958) GN=TVP18 PE=3 SV=1 - [TVP18_MAGO7]	16.11	2	3	3	10	149	149	16.0056	8.79248
G4N7X6	Rhomboid protein 2 OS=Magnaporthe oryzae (strain 70-15 / ATCC MYA-4617 / FGSC 8958) GN=MGG_03522 PE=4 SV=1 - [G4N7X6_MAGO7]	11.83	4	4	4	8	262	262	28.6135	9.89111
G4MS49	(R)-benzylsuccinyl-CoA dehydrogenase OS=Magnaporthe oryzae (strain P131) GN=OOW_P131scaffold01209g5 PE=3 SV=1 - [L7IYJ9_MAGOP]	12.75	2	4	4	10	455	455	50.7855	7.84033
G4N7H1	CAMKK/META protein kinase OS=Magnaporthe oryzae (strain 70-15 / ATCC MYA-4617 / FGSC 8958) GN=MGG_06421 PE=4 SV=1 - [G4N7H1_MAGO7]	1.84	2	1	1	2	651	651	72.3202	5.5415
G4NEM6	CMGC/DYRK/DYRK2 protein kinase OS=Magnaporthe oryzae (strain 70-15 / ATCC MYA-4617 / FGSC 8958) GN=MGG_00760 PE=4 SV=1 - [G4NEM6_MAGO7]	0.57	2	1	1	7	1411	1411	153.004	10.1841
G4N2V2	Altered inheritance of mitochondria protein 24, mitochondrial OS=Magnaporthe oryzae (strain 70-15 / ATCC MYA-4617 / FGSC 8958) GN=MGG_07962 PE=3 SV=1 - [G4N2V2_MAGO7]	3.81	1	1	1	1	394	394	42.5566	10.521
G5EGV3	Initiation-specific alpha-1,6-mannosyltransferase OS=Magnaporthe oryzae (strain 70-15 / ATCC MYA-4617 / FGSC 8958) GN=MGCH7_ch7g617 PE=4 SV=1 - [G5EGV3_MAGO7]	9.16	1	2	2	4	382	382	43.3229	5.78271
G4NCW1	Vacuolar transporter chaperone 1 OS=Magnaporthe oryzae (strain 70-15 / ATCC MYA-4617 / FGSC 8958) GN=MGG_01006 PE=4 SV=1 - [G4NCW1_MAGO7]	10.94	2	2	2	2	128	128	14.4847	10.7114
G4N8E9	Uncharacterized protein OS=Magnaporthe oryzae (strain P131) GN=OOW_P131scaffold01189g3 PE=4 SV=1 - [L7IZM3_MAGOP]	3.84	1	1	1	1	495	495	54.2771	5.05908
G4NHY2	Uncharacterized protein OS=Magnaporthe oryzae (strain 70-15 / ATCC MYA-4617 / FGSC 8958) GN=MGG_09400 PE=3 SV=1 - [G4NHY2_MAGO7]	14.57	1	3	3	3	151	151	16.9665	5.21143
G4N4M7	Uncharacterized protein OS=Magnaporthe oryzae (strain 70-15 / ATCC MYA-4617 / FGSC 8958) GN=MGG_06003 PE=4 SV=1 - [G4N4M7_MAGO7]	12.39	1	1	1	4	113	113	12.4894	10.3306
G4NJE8	Uncharacterized protein OS=Magnaporthe oryzae (strain 70-15 / ATCC MYA-4617 / FGSC 8958) GN=MGG_02669 PE=4 SV=1 - [G4NJE8_MAGO7]	18.09	2	2	2	8	94	94	10.4364	9.33447
G4NBS1	Uncharacterized protein OS=Magnaporthe oryzae (strain 70-15 / ATCC MYA-4617 / FGSC 8958) GN=MGG_11567 PE=4 SV=1 - [G4NBS1_MAGO7]	4.46	3	1	1	1	336	336	36.7707	10.8726
G4MLM6	ATP-dependent Clp protease proteolytic subunit OS=Magnaporthe oryzae (strain P131) GN=OOW_P131scaffold00177g50 PE=3 SV=1 - [L7JNY7_MAGOP]	12.77	1	3	3	8	274	274	29.5861	7.94287
G4N1D5	Uncharacterized protein OS=Magnaporthe oryzae (strain 70-15 / ATCC MYA-4617 / FGSC 8958) GN=MGG_09527 PE=4 SV=1 - [G4N1D5_MAGO7]	6.38	1	2	2	3	392	392	39.2539	7.98682
G4NJ22	Phospholipid-transporting ATPase OS=Magnaporthe oryzae (strain P131) GN=OOW_P131scaffold01054g19 PE=3 SV=1 - [L7J394_MAGOP]	2.76	2	3	3	4	1524	1524	171.228	6.30322
G4NGD8	Extradiol ring-cleavage dioxygenase OS=Magnaporthe oryzae (strain P131) GN=OOW_P131scaffold00197g7 PE=4 SV=1 - [L7JLB5_MAGOP]	7.58	2	2	2	2	330	330	35.503	6.45557
G4N4M4	Putative uncharacterized protein OS=Magnaporthe oryzae PE=2 SV=1 - [D4NXC4_MAGOR]	8.67	1	1	1	8	150	150	15.8012	8.80713
G4NGF3	Mitochondrial ribosomal protein subunit S4 OS=Magnaporthe oryzae (strain 70-15 / ATCC MYA-4617 / FGSC 8958) GN=MGG_04330 PE=4 SV=1 - [G4NGF3_MAGO7]	3	2	1	1	2	701	701	75.0121	6.60986
G4N5Q9	Uncharacterized protein OS=Magnaporthe oryzae (strain 70-15 / ATCC MYA-4617 / FGSC 8958) GN=MGG_05295 PE=4 SV=1 - [G4N5Q9_MAGO7]	14.06	2	3	3	6	313	313	34.2567	9.42236
G4MPJ1	Uncharacterized protein OS=Magnaporthe oryzae (strain 70-15 / ATCC MYA-4617 / FGSC 8958) GN=MGG_16457 PE=4 SV=1 - [G4MPJ1_MAGO7]	2.55	2	2	2	2	943	943	106.678	5.47803
G4MMD6	Uncharacterized protein OS=Magnaporthe oryzae (strain 70-15 / ATCC MYA-4617 / FGSC 8958) GN=MGG_01993 PE=4 SV=1 - [G4MMD6_MAGO7]	33.66	2	2	2	7	101	101	10.3427	8.08936
G4MRZ1	Uncharacterized protein OS=Magnaporthe oryzae (strain 70-15 / ATCC MYA-4617 / FGSC 8958) GN=MGG_02477 PE=4 SV=1 - [G4MRZ1_MAGO7]	11.66	2	3	3	9	386	386	42.9906	6.44287
G4N3X8	Uncharacterized protein OS=Magnaporthe oryzae (strain 70-15 / ATCC MYA-4617 / FGSC 8958) GN=MGG_05879 PE=4 SV=1 - [G4N3X8_MAGO7]	23.05	1	4	4	8	243	243	26.6853	4.89404
G4N7J9	Uncharacterized protein OS=Magnaporthe oryzae (strain 70-15 / ATCC MYA-4617 / FGSC 8958) GN=MGG_06396 PE=4 SV=1 - [G4N7J9_MAGO7]	1.62	3	2	2	5	1419	1419	149.451	9.29053
G4MNJ3	Transmembrane protein 56 OS=Magnaporthe oryzae (strain 70-15 / ATCC MYA-4617 / FGSC 8958) GN=MGG_05625 PE=4 SV=1 - [G4MNJ3_MAGO7]	8.29	1	3	3	7	350	350	39.7694	7.81104
G4NAL5	Uncharacterized protein OS=Magnaporthe oryzae (strain 70-15 / ATCC MYA-4617 / FGSC 8958) GN=MGG_13957 PE=4 SV=1 - [G4NAL5_MAGO7]	1.29	2	1	1	3	464	464	49.699	8.36768
G4MZ63	Methylenetetrahydrofolate reductase OS=Magnaporthe oryzae (strain 70-15 / ATCC MYA-4617 / FGSC 8958) GN=MGG_08171 PE=3 SV=1 - [G4MZ63_MAGO7]	4.35	1	3	3	7	690	690	76.2305	5.30029
O13353	Chitin synthase 4 (Fragment) OS=Magnaporthe oryzae (strain P131) GN=OOW_P131scaffold00174g4 PE=4 SV=1 - [L7JM50_MAGOP]	1.97	2	2	2	2	812	812	91.4443	7.79639
G4NHP6	7-dehydrocholesterol reductase OS=Magnaporthe oryzae (strain P131) GN=OOW_P131scaffold00368g3 PE=4 SV=1 - [L7JGG9_MAGOP]	9.05	2	4	4	7	420	420	47.9519	8.1626
G4MTB3	Uncharacterized protein OS=Magnaporthe oryzae (strain 70-15 / ATCC MYA-4617 / FGSC 8958) GN=MGG_15554 PE=4 SV=1 - [G4MTB3_MAGO7]	8.26	3	4	4	8	642	642	70.857	5.08447
G4MNY1	37S ribosomal protein S5 OS=Magnaporthe oryzae (strain 70-15 / ATCC MYA-4617 / FGSC 8958) GN=MGG_06995 PE=3 SV=1 - [G4MNY1_MAGO7]	6.98	1	3	3	3	444	444	49.2169	9.81787
G4NIH6	Uncharacterized protein OS=Magnaporthe oryzae (strain 70-15 / ATCC MYA-4617 / FGSC 8958) GN=MGG_09839 PE=4 SV=1 - [G4NIH6_MAGO7]	14.47	2	3	3	3	304	304	32.66	6.84424
G4NDY9	Serine palmitoyltransferase 1 OS=Magnaporthe oryzae (strain 70-15 / ATCC MYA-4617 / FGSC 8958) GN=MGG_00864 PE=4 SV=1 - [G4NDY9_MAGO7]	3.47	1	2	2	5	519	519	57.4248	7.41553
G4MUD6	Sensor protein gacS OS=Magnaporthe oryzae (strain 70-15 / ATCC MYA-4617 / FGSC 8958) GN=MGG_11174 PE=4 SV=1 - [G4MUD6_MAGO7]	1.22	2	1	2	3	1307	1307	142.854	5.5415
Q2KH41	Putative uncharacterized protein OS=Magnaporthe oryzae (strain 70-15 / ATCC MYA-4617 / FGSC 8958) GN=MGCH7_ch7g144 PE=4 SV=1 - [Q2KH41_MAGO7]	2.16	3	1	1	2	742	742	80.8433	6.43018
G4MV57	Membrane-bound O-acyltransferase domain-containing protein 1 OS=Magnaporthe oryzae (strain P131) GN=OOW_P131scaffold00399g23 PE=3 SV=1 - [L7JDS0_MAGOP]	6.15	1	3	3	4	553	553	62.7075	9.81787
G4N577	tRNA (Cytosine-5-)-methyltransferase NCL1 OS=Magnaporthe oryzae (strain 70-15 / ATCC MYA-4617 / FGSC 8958) GN=MGG_13217 PE=3 SV=1 - [G4N577_MAGO7]	12.43	2	10	10	11	861	861	95.82	5.52881
G4MSD5	Thymidylate synthase OS=Magnaporthe oryzae (strain P131) GN=OOW_P131scaffold01358g30 PE=3 SV=1 - [L7ITX4_MAGOP]	8.55	1	3	3	3	339	339	37.5357	6.52197
G4MYP4	Uncharacterized protein OS=Magnaporthe oryzae (strain 70-15 / ATCC MYA-4617 / FGSC 8958) GN=MGG_11224 PE=4 SV=1 - [G4MYP4_MAGO7]	7.97	1	2	2	4	301	301	31.0555	6.99072
G4NEP1	Uncharacterized protein OS=Magnaporthe oryzae (strain Y34) GN=OOU_Y34scaffold00669g76 PE=4 SV=1 - [L7HZE4_MAGOY]	6.86	1	6	6	7	1049	1049	117.881	5.24951
G4MVL7	Elongation of fatty acids protein OS=Magnaporthe oryzae (strain P131) GN=OOW_P131scaffold01214g33 PE=3 SV=1 - [L7IY72_MAGOP]	2.66	2	1	1	1	488	488	53.1489	9.72998
G4N352	Uncharacterized protein OS=Magnaporthe oryzae (strain P131) GN=OOW_P131scaffold00314g69 PE=4 SV=1 - [L7JH03_MAGOP]	6.39	1	3	3	6	548	548	57.3369	5.16064
G4MSF9	Uncharacterized protein OS=Magnaporthe oryzae (strain P131) GN=OOW_P131scaffold01358g54 PE=4 SV=1 - [L7IV12_MAGOP]	15.85	2	4	5	8	347	347	38.9067	8.03076
G4MPE9	Ubiquitin carboxyl-terminal hydrolase OS=Magnaporthe oryzae (strain P131) GN=OOW_P131scaffold01011g4 PE=3 SV=1 - [L7J6D5_MAGOP]	11.28	1	3	3	9	328	328	36.389	5.08447
G4MK90	Methionine-R-sulfoxide reductase B2 OS=Magnaporthe oryzae (strain P131) GN=OOW_P131scaffold00546g23 PE=4 SV=1 - [L7J9X5_MAGOP]	6.8	2	1	1	3	147	147	16.1917	7.06396
G4N6R6	ER lumen protein retaining receptor OS=Magnaporthe oryzae (strain 70-15 / ATCC MYA-4617 / FGSC 8958) GN=MGG_03681 PE=4 SV=1 - [G4N6R6_MAGO7]	3.9	1	2	2	5	359	359	40.2662	5.21143
Q2KF61	Putative uncharacterized protein OS=Magnaporthe oryzae (strain 70-15 / ATCC MYA-4617 / FGSC 8958) GN=MGCH7_ch7g825 PE=4 SV=1 - [Q2KF61_MAGO7]	6.67	2	2	2	2	300	300	33.1941	5.42725
G4NFX3	Uncharacterized protein OS=Magnaporthe oryzae (strain 70-15 / ATCC MYA-4617 / FGSC 8958) GN=MGG_11072 PE=4 SV=1 - [G4NFX3_MAGO7]	13.49	1	1	1	3	126	126	13.5863	5.03369
G4MWW7	Glyoxylate reductase OS=Magnaporthe oryzae (strain P131) GN=OOW_P131scaffold01028g20 PE=3 SV=1 - [L7J462_MAGOP]	19.56	2	6	6	6	363	363	39.9017	7.02002
G4N125	Peroxidase OS=Magnaporthe oryzae (strain 70-15 / ATCC MYA-4617 / FGSC 8958) GN=MGG_07790 PE=3 SV=1 - [G4N125_MAGO7]	9.28	1	2	2	2	474	474	51.3019	6.55127
G4MW64	Guanine nucleotide-binding protein alpha-3 subunit OS=Magnaporthe oryzae (strain P131) GN=OOW_P131scaffold00254g10 PE=4 SV=1 - [L7JLC9_MAGOP]	17.18	2	4	5	6	355	355	40.9677	6.21436
G4NJ01	Lactose permease OS=Magnaporthe oryzae (strain 70-15 / ATCC MYA-4617 / FGSC 8958) GN=MGG_02783 PE=4 SV=1 - [G4NJ01_MAGO7]	7.01	3	4	4	6	542	542	60.9283	8.1626
G4MT10	Uncharacterized protein OS=Magnaporthe oryzae (strain 70-15 / ATCC MYA-4617 / FGSC 8958) GN=MGG_01505 PE=4 SV=1 - [G4MT10_MAGO7]	10.67	1	1	1	2	75	75	8.58739	8.57275
G4MS45	WSC domain-containing protein OS=Magnaporthe oryzae (strain 70-15 / ATCC MYA-4617 / FGSC 8958) GN=MGG_10514 PE=4 SV=1 - [G4MS45_MAGO7]	9.11	1	3	3	7	384	384	42.0509	8.79248
G4MMY8	Structural maintenance of chromosomes protein OS=Magnaporthe oryzae (strain P131) GN=OOW_P131scaffold01268g2 PE=3 SV=1 - [L7IXM0_MAGOP]	1.67	1	2	2	2	1259	1259	144.267	5.5415
G4N058	1-acyl-sn-glycerol-3-phosphate acyltransferase OS=Magnaporthe oryzae (strain 70-15 / ATCC MYA-4617 / FGSC 8958) GN=MGG_11040 PE=3 SV=1 - [G4N058_MAGO7]	18.48	1	5	5	9	303	303	33.3243	9.12939
G4MRY9	Uncharacterized protein OS=Magnaporthe oryzae (strain 70-15 / ATCC MYA-4617 / FGSC 8958) GN=MGG_02476 PE=4 SV=1 - [G4MRY9_MAGO7]	2.74	3	5	5	8	2189	2189	244.382	5.74463
G4MQ71	Peptidase S9 prolyl oligopeptidase active site-containing protein OS=Magnaporthe oryzae (strain 70-15 / ATCC MYA-4617 / FGSC 8958) GN=MGG_09249 PE=4 SV=1 - [G4MQ71_MAGO7]	1.64	2	1	1	2	670	670	74.4864	5.87158
G4N4M3	H/ACA ribonucleoprotein complex subunit 2 OS=Magnaporthe oryzae (strain 70-15 / ATCC MYA-4617 / FGSC 8958) GN=MGG_05999 PE=4 SV=1 - [G4N4M3_MAGO7]	8.7	1	2	2	3	253	253	27.577	9.45166
G4MXC3	Fatty acid transporter OS=Magnaporthe oryzae (strain 70-15 / ATCC MYA-4617 / FGSC 8958) GN=MGG_08257 PE=4 SV=1 - [G4MXC3_MAGO7]	10.39	1	6	6	7	635	635	70.2748	8.54346
G4N167	Sorbitol utilization protein SOU2 OS=Magnaporthe oryzae (strain P131) GN=OOW_P131scaffold00115g18 PE=4 SV=1 - [L7JP15_MAGOP]	7.53	1	1	1	1	292	292	31.4595	6.78564
G4NII8	Uncharacterized protein OS=Magnaporthe oryzae (strain 70-15 / ATCC MYA-4617 / FGSC 8958) GN=MGG_17841 PE=4 SV=1 - [G4NII8_MAGO7]	12.57	2	6	6	8	700	700	74.8389	7.02002
G4MM59	Uncharacterized protein OS=Magnaporthe oryzae (strain 70-15 / ATCC MYA-4617 / FGSC 8958) GN=MGG_16374 PE=4 SV=1 - [G4MM59_MAGO7]	8	2	2	2	3	350	350	38.5007	5.80811
G4N3K5	Putative phosphoethanolamine N-methyltransferase OS=Magnaporthe oryzae GN=MGG_04987 PE=4 SV=1 - [L7TF35_MAGOR]	3.85	1	4	4	4	1116	1116	121.088	8.29443
G4N8W5	Uncharacterized protein OS=Magnaporthe oryzae (strain 70-15 / ATCC MYA-4617 / FGSC 8958) GN=MGG_03368 PE=4 SV=1 - [G4N8W5_MAGO7]	4.94	1	1	1	5	243	243	23.6716	8.49951
G5EHN9	Peroxisomal membrane protein PEX16 OS=Magnaporthe oryzae (strain 70-15 / ATCC MYA-4617 / FGSC 8958) GN=MGCH7_ch7g174 PE=4 SV=1 - [G5EHN9_MAGO7]	7.52	2	3	3	4	439	439	48.3954	9.78857
G4MNM1	54S ribosomal protein RML2, mitochondrial OS=Magnaporthe oryzae (strain P131) GN=OOW_P131scaffold01379g16 PE=4 SV=1 - [L7ITC9_MAGOP]	3.87	1	1	1	2	388	388	42.7704	11.1216
G4MLV7	Uncharacterized protein OS=Magnaporthe oryzae (strain 70-15 / ATCC MYA-4617 / FGSC 8958) GN=MGG_10921 PE=4 SV=1 - [G4MLV7_MAGO7]	12.55	4	3	3	7	263	263	29.9891	5.21143
G5EHQ7	Mitochondrial pyruvate carrier OS=Magnaporthe oryzae (strain 70-15 / ATCC MYA-4617 / FGSC 8958) GN=MGCH7_ch7g401 PE=3 SV=1 - [G5EHQ7_MAGO7]	21.97	1	4	4	11	173	173	19.2282	10.272
G4MQG5	Tetracenomycin polyketide synthesis O-methyltransferase tcmP OS=Magnaporthe oryzae (strain P131) GN=OOW_P131scaffold01630g1 PE=4 SV=1 - [L7ISX0_MAGOP]	13.49	2	3	3	4	304	304	34.3868	7.91357
G4N124	3-phytase OS=Magnaporthe oryzae (strain P131) GN=OOW_P131scaffold01126g6 PE=4 SV=1 - [L7J1E5_MAGOP]	2.79	2	1	1	3	753	753	79.1504	4.66553
G4NAT8	Glycerol-3-phosphate dehydrogenase OS=Magnaporthe oryzae (strain 70-15 / ATCC MYA-4617 / FGSC 8958) GN=MGG_03147 PE=3 SV=1 - [G4NAT8_MAGO7]	7.45	1	5	5	6	685	685	75.8513	7.59131
G4N117	QA-X OS=Magnaporthe oryzae (strain 70-15 / ATCC MYA-4617 / FGSC 8958) GN=MGG_15250 PE=4 SV=1 - [G4N117_MAGO7]	6.97	3	2	2	2	330	330	35.8229	5.36377
G4MNP0	C2 domain-containing protein OS=Magnaporthe oryzae (strain P131) GN=OOW_P131scaffold00485g2 PE=4 SV=1 - [L7JBC3_MAGOP]	2.42	1	1	1	2	703	703	79.7667	7.15186
G4MPV9	Uncharacterized protein OS=Magnaporthe oryzae (strain P131) GN=OOW_P131scaffold00417g14 PE=4 SV=1 - [L7JD98_MAGOP]	7.94	1	2	2	3	315	315	35.1036	5.66846
G4NII6	Sugar transporter OS=Magnaporthe oryzae (strain 70-15 / ATCC MYA-4617 / FGSC 8958) GN=MGG_09827 PE=4 SV=1 - [G4NII6_MAGO7]	2.33	1	1	1	1	515	515	56.3015	6.60986
G4N4T4	tRNA ligase OS=Magnaporthe oryzae (strain P131) GN=OOW_P131scaffold00982g57 PE=3 SV=1 - [L7J6M1_MAGOP]	4.45	2	4	4	5	831	831	92.7957	8.14795
G4MML2	Hob3 OS=Magnaporthe oryzae (strain 70-15 / ATCC MYA-4617 / FGSC 8958) GN=MGG_05528 PE=4 SV=1 - [G4MML2_MAGO7]	17.24	2	4	4	4	261	261	30.0381	6.41748
G5EGX3	3-oxoacyl-[acyl-carrier-protein] reductase OS=Magnaporthe oryzae (strain 70-15 / ATCC MYA-4617 / FGSC 8958) GN=MGCH7_ch7g801 PE=4 SV=1 - [G5EGX3_MAGO7]	25.37	1	5	5	6	272	272	28.4692	5.30029
G4NIL8	Uncharacterized protein (Fragment) OS=Magnaporthe oryzae (strain P131) GN=OOW_P131scaffold01236g1 PE=4 SV=1 - [L7IYW0_MAGOP]	10.87	2	1	1	1	138	138	14.4235	7.50342
G4NE52	Mitochondrial import inner membrane translocase subunit tim10 OS=Magnaporthe oryzae (strain P131) GN=OOW_P131scaffold00525g4 PE=3 SV=1 - [L7JB71_MAGOP]	12.22	1	1	1	2	90	90	9.74485	8.17725
G4NE22	Uncharacterized protein OS=Magnaporthe oryzae (strain P131) GN=OOW_P131scaffold00123g21 PE=4 SV=1 - [L7JPI2_MAGOP]	0.75	2	1	1	3	1202	1202	121.131	4.36084
G5EI56	Ankyrin repeat-containing protein OS=Magnaporthe oryzae (strain 70-15 / ATCC MYA-4617 / FGSC 8958) GN=MGCH7_ch7g858 PE=4 SV=1 - [G5EI56_MAGO7]	7.47	1	5	5	6	656	656	72.7842	8.52881
G4MTU9	DNA-directed RNA polymerase subunit beta OS=Magnaporthe oryzae (strain P131) GN=OOW_P131scaffold00228g2 PE=3 SV=1 - [L7JL50_MAGOP]	3.86	2	3	4	7	1192	1192	133.004	7.81104
G4NE77	Leptomycin B resistance protein pmd1 OS=Magnaporthe oryzae (strain P131) GN=OOW_P131scaffold00525g31 PE=4 SV=1 - [L7JA75_MAGOP]	1.88	1	2	2	3	1333	1333	145.432	7.25439
G4MR84	DNA-directed RNA polymerase subunit beta OS=Magnaporthe oryzae (strain P131) GN=OOW_P131scaffold01370g10 PE=3 SV=1 - [L7IUN9_MAGOP]	2.9	1	4	4	8	1276	1276	143.573	7.10791
G4N640	Malic enzyme OS=Magnaporthe oryzae (strain 70-15 / ATCC MYA-4617 / FGSC 8958) GN=MGG_08562 PE=3 SV=1 - [G4N640_MAGO7]	9.6	2	4	4	4	604	604	65.2004	5.31299
G4N1M3	Glycogenin OS=Magnaporthe oryzae (strain P131) GN=OOW_P131scaffold01198g23 PE=4 SV=1 - [L7IZ26_MAGOP]	3.1	2	2	2	4	840	840	93.3557	6.18896
G4MX54	Formyl transferase OS=Magnaporthe oryzae (strain P131) GN=OOW_P131scaffold00062g4 PE=3 SV=1 - [L7JRR5_MAGOP]	9.15	1	3	3	3	284	284	31.4073	6.96143
G4NDR2	alpha-1,2-Mannosidase OS=Magnaporthe oryzae (strain 70-15 / ATCC MYA-4617 / FGSC 8958) GN=MGG_11475 PE=3 SV=1 - [G4NDR2_MAGO7]	5.45	1	4	4	4	1028	1028	113.145	7.04932
G4MKI9	FK506-binding protein OS=Magnaporthe oryzae (strain P131) GN=OOW_P131scaffold01147g6 PE=3 SV=1 - [L7J2P5_MAGOP]	9.07	1	3	3	3	485	485	52.2356	4.56396
G4NDJ0	NADP-dependent alcohol dehydrogenase 6 OS=Magnaporthe oryzae (strain 70-15 / ATCC MYA-4617 / FGSC 8958) GN=MGG_00246 PE=4 SV=1 - [G4NDJ0_MAGO7]	8.79	1	2	2	3	364	364	39.4245	6.45557
G4NDU7	Uncharacterized protein OS=Magnaporthe oryzae (strain P131) GN=OOW_P131scaffold00214g26 PE=4 SV=1 - [L7JMT6_MAGOP]	13.89	1	3	3	8	360	360	38.7514	5.22412
G4MYN9	AP-1 complex subunit sigma-1 OS=Magnaporthe oryzae (strain 70-15 / ATCC MYA-4617 / FGSC 8958) GN=MGG_11227 PE=4 SV=1 - [G4MYN9_MAGO7]	5.81	2	1	1	2	155	155	18.2204	6.18896
G4MLQ6	Translation machinery-associated protein 20 OS=Magnaporthe oryzae (strain P131) GN=OOW_P131scaffold00691g5 PE=3 SV=1 - [L7J9M0_MAGOP]	9.95	1	2	2	4	201	201	21.9636	7.50342
G4MTY1	Sec20 domain-containing protein OS=Magnaporthe oryzae (strain 70-15 / ATCC MYA-4617 / FGSC 8958) GN=MGG_01600 PE=4 SV=1 - [G4MTY1_MAGO7]	1.85	2	1	1	2	432	432	46.9428	5.85889
G4N898	Uncharacterized protein OS=Magnaporthe oryzae (strain 70-15 / ATCC MYA-4617 / FGSC 8958) GN=MGG_03462 PE=4 SV=1 - [G4N898_MAGO7]	9.93	1	4	4	4	584	584	64.8094	7.28369
G4MW90	GPI ethanolamine phosphate transferase 1 OS=Magnaporthe oryzae (strain P131) GN=OOW_P131scaffold00254g33 PE=4 SV=1 - [L7JJV9_MAGOP]	4.23	2	4	4	8	969	969	106.152	6.85889
G4MN07	Uncharacterized protein OS=Magnaporthe oryzae (strain 70-15 / ATCC MYA-4617 / FGSC 8958) GN=MGG_06907 PE=4 SV=1 - [G4MN07_MAGO7]	30.46	2	3	3	11	151	151	16.0612	9.33447
G4MPW3	Uncharacterized protein OS=Magnaporthe oryzae (strain 70-15 / ATCC MYA-4617 / FGSC 8958) GN=MGG_05747 PE=4 SV=1 - [G4MPW3_MAGO7]	10.11	2	2	2	4	178	178	18.6872	8.51416
G4MRY0	Ribonucleoprotein-associated protein OS=Magnaporthe oryzae (strain 70-15 / ATCC MYA-4617 / FGSC 8958) GN=MGG_02467 PE=4 SV=1 - [G4MRY0_MAGO7]	23.81	1	2	2	10	126	126	13.4242	6.53662
G4MVF3	Uncharacterized protein OS=Magnaporthe oryzae (strain P131) GN=OOW_P131scaffold01551g5 PE=4 SV=1 - [L7ITQ7_MAGOP]	3.38	2	1	1	2	296	296	32.3451	4.99561
G4MUW8	Chorismate mutase OS=Magnaporthe oryzae (strain 70-15 / ATCC MYA-4617 / FGSC 8958) GN=MGG_01710 PE=4 SV=1 - [G4MUW8_MAGO7]	9.4	2	2	2	2	266	266	30.5237	6.16357
G4NIQ4	Uncharacterized protein OS=Magnaporthe oryzae (strain 70-15 / ATCC MYA-4617 / FGSC 8958) GN=MGG_17680 PE=4 SV=1 - [G4NIQ4_MAGO7]	19.83	2	2	2	11	116	116	12.5171	5.17334
G4N092	Glycosyl hydrolase family 43 protein OS=Magnaporthe oryzae (strain P131) GN=OOW_P131scaffold01169g5 PE=3 SV=1 - [L7J067_MAGOP]	14.12	2	3	3	5	340	340	36.6246	4.71631
G4NC77	Vesicle transport V-SNARE protein vti1 OS=Magnaporthe oryzae (strain 70-15 / ATCC MYA-4617 / FGSC 8958) GN=MGG_01124 PE=4 SV=1 - [G4NC77_MAGO7]	33.91	2	5	5	5	233	233	25.8586	8.99756
G4N2Y3	Cytochrome P450 monooxygenase OS=Magnaporthe oryzae (strain 70-15 / ATCC MYA-4617 / FGSC 8958) GN=MGG_07626 PE=3 SV=1 - [G4N2Y3_MAGO7]	10.74	1	4	4	5	512	512	57.4212	8.55811
G4N819	Uncharacterized protein OS=Magnaporthe oryzae (strain 70-15 / ATCC MYA-4617 / FGSC 8958) GN=MGG_03483 PE=3 SV=1 - [G4N819_MAGO7]	16.16	1	4	4	8	229	229	25.7588	7.53271
G4NC80	Vesicular-fusion protein SEC17 OS=Magnaporthe oryzae (strain 70-15 / ATCC MYA-4617 / FGSC 8958) GN=MGG_01121 PE=4 SV=1 - [G4NC80_MAGO7]	7.88	1	2	2	3	292	292	32.7872	5.13525
G4N1L9	Mitochondrial phosphate carrier protein OS=Magnaporthe oryzae (strain P131) GN=OOW_P131scaffold01198g19 PE=3 SV=1 - [L7IZ53_MAGOP]	8.12	1	1	3	9	308	308	32.0739	9.65674
G4N331	Potassium:hydrogen antiporter OS=Magnaporthe oryzae (strain 70-15 / ATCC MYA-4617 / FGSC 8958) GN=MGG_07661 PE=4 SV=1 - [G4N331_MAGO7]	4.62	1	3	3	3	930	930	99.5385	6.3667
G4NHB9	Alpha-1,2-mannosyltransferase alg-11 OS=Magnaporthe oryzae (strain 70-15 / ATCC MYA-4617 / FGSC 8958) GN=MGG_03883 PE=4 SV=1 - [G4NHB9_MAGO7]	7.03	2	4	4	5	569	569	63.5212	7.59131
G4N1S3	Ras-2 OS=Magnaporthe oryzae (strain P131) GN=OOW_P131scaffold00321g25 PE=4 SV=1 - [L7JGN0_MAGOP]	10.37	1	3	3	4	241	241	26.8748	9.0708
P0C149	Vacuolar-sorting protein SNF7 OS=Magnaporthe oryzae (strain 70-15 / ATCC MYA-4617 / FGSC 8958) GN=SNF7 PE=3 SV=1 - [SNF7_MAGO7]	6.19	2	1	1	3	226	226	25.0417	5.021
G4MLN5	O-acyltransferase OS=Magnaporthe oryzae (strain 70-15 / ATCC MYA-4617 / FGSC 8958) GN=MGG_06765 PE=3 SV=1 - [G4MLN5_MAGO7]	6.06	1	3	3	3	594	594	67.7256	7.73779
G4N4R1	NMDA receptor-regulated protein 1 OS=Magnaporthe oryzae (strain P131) GN=OOW_P131scaffold00982g35 PE=4 SV=1 - [L7J5H0_MAGOP]	5.5	1	5	5	6	837	837	94.3293	8.27979
G4NB22	Uncharacterized protein OS=Magnaporthe oryzae (strain 70-15 / ATCC MYA-4617 / FGSC 8958) GN=MGG_00648 PE=4 SV=1 - [G4NB22_MAGO7]	3.57	1	1	1	1	280	280	29.9941	9.49561
G5EHE1	Ubiquitin thioesterase OS=Magnaporthe oryzae (strain 70-15 / ATCC MYA-4617 / FGSC 8958) GN=MGCH7_ch7g1104 PE=4 SV=1 - [G5EHE1_MAGO7]	8.68	1	4	4	5	714	714	78.7798	6.07471
G4MPG4	Uncharacterized protein OS=Magnaporthe oryzae (strain P131) GN=OOW_P131scaffold01338g73 PE=4 SV=1 - [L7IVM5_MAGOP]	4.07	1	1	1	2	418	418	45.8635	7.62061
G4MWY5	CAMK/CAMKL/KIN4 protein kinase OS=Magnaporthe oryzae (strain 70-15 / ATCC MYA-4617 / FGSC 8958) GN=MGG_01196 PE=4 SV=1 - [G4MWY5_MAGO7]	2.87	2	2	2	3	1219	1219	132.702	9.67139
G4NBC7	Cytochrome P450 OS=Magnaporthe oryzae (strain 70-15 / ATCC MYA-4617 / FGSC 8958) GN=MGG_00572 PE=3 SV=1 - [G4NBC7_MAGO7]	2.19	1	1	1	1	548	548	62.4734	8.41162
G4N4E2	Uncharacterized protein OS=Magnaporthe oryzae (strain 70-15 / ATCC MYA-4617 / FGSC 8958) GN=MGG_16867 PE=4 SV=1 - [G4N4E2_MAGO7]	2.79	2	3	3	4	1183	1183	131.749	5.70654
G4N4X0	Histidinol-phosphatase OS=Magnaporthe oryzae (strain P131) GN=OOW_P131scaffold00439g31 PE=4 SV=1 - [L7JDT9_MAGOP]	19.15	2	6	6	9	329	329	36.7512	5.88428
A4RHX3	Protein GET1 OS=Magnaporthe oryzae (strain 70-15 / ATCC MYA-4617 / FGSC 8958) GN=GET1 PE=3 SV=2 - [GET1_MAGO7]	13.49	1	3	3	6	215	215	24.5671	9.65674
G4N6P4	Geranylgeranyl transferase type-2 subunit alpha OS=Magnaporthe oryzae (strain 70-15 / ATCC MYA-4617 / FGSC 8958) GN=MGG_14855 PE=4 SV=1 - [G4N6P4_MAGO7]	8.85	3	3	3	5	407	407	46.9331	6.37939
G4N9R1	Actin-6 OS=Magnaporthe oryzae (strain P131) GN=OOW_P131scaffold00065g4 PE=3 SV=1 - [L7JRP4_MAGOP]	9.55	1	3	3	7	398	398	44.714	6.29053
G4MUS6	Putative uncharacterized protein OS=Magnaporthe oryzae PE=2 SV=1 - [D4NXG7_MAGOR]	12.33	2	2	2	3	146	146	16.2063	7.50342
G4MYD1	Pseudouridine synthase OS=Magnaporthe oryzae (strain 70-15 / ATCC MYA-4617 / FGSC 8958) GN=MGG_08117 PE=3 SV=1 - [G4MYD1_MAGO7]	2.26	2	1	1	1	487	487	54.4572	7.34229
G4MW51	Uncharacterized protein OS=Magnaporthe oryzae (strain 70-15 / ATCC MYA-4617 / FGSC 8958) GN=MGG_08973 PE=4 SV=1 - [G4MW51_MAGO7]	4.83	3	1	1	2	269	269	30.0519	5.71924
G4N7R1	Ubiquitin thioesterase OTU1 OS=Magnaporthe oryzae (strain 70-15 / ATCC MYA-4617 / FGSC 8958) GN=MGG_03532 PE=4 SV=1 - [G4N7R1_MAGO7]	14.5	2	4	4	12	338	338	37.3526	5.04639
G4MND9	Cyclopropane-fatty-acyl-phospholipid synthase OS=Magnaporthe oryzae (strain 70-15 / ATCC MYA-4617 / FGSC 8958) GN=MGG_06926 PE=4 SV=1 - [G4MND9_MAGO7]	3.99	1	1	1	1	351	351	40.2888	6.30322
G4MMX4	Uncharacterized protein OS=Magnaporthe oryzae (strain 70-15 / ATCC MYA-4617 / FGSC 8958) GN=MGG_11804 PE=4 SV=1 - [G4MMX4_MAGO7]	4.9	2	1	1	3	204	204	22.1452	6.87354
G4MKU3	Uncharacterized protein OS=Magnaporthe oryzae (strain 70-15 / ATCC MYA-4617 / FGSC 8958) GN=MGG_05351 PE=4 SV=1 - [G4MKU3_MAGO7]	3.09	2	1	1	2	421	421	40.6686	5.35107
G4NEB4	CAMK/CAMKL/AMPK protein kinase OS=Magnaporthe oryzae (strain 70-15 / ATCC MYA-4617 / FGSC 8958) GN=MGG_00803 PE=4 SV=1 - [G4NEB4_MAGO7]	2.86	1	1	2	2	803	803	88.9534	7.00537
G4NFS0	tRNA selenocysteine-associated protein 1 OS=Magnaporthe oryzae (strain 70-15 / ATCC MYA-4617 / FGSC 8958) GN=MGG_08741 PE=4 SV=1 - [G4NFS0_MAGO7]	14.22	1	5	5	9	415	415	44.6163	7.45947
G5EHD2	Uncharacterized protein OS=Magnaporthe oryzae (strain 70-15 / ATCC MYA-4617 / FGSC 8958) GN=MGCH7_ch7g426 PE=4 SV=1 - [G5EHD2_MAGO7]	28	1	3	3	3	125	125	13.6671	9.61279
G4N8S7	Mannosyltransferase OS=Magnaporthe oryzae (strain 70-15 / ATCC MYA-4617 / FGSC 8958) GN=MGG_14835 PE=3 SV=1 - [G4N8S7_MAGO7]	4.79	2	3	3	7	605	605	68.0217	8.60205
G4NJG3	Ectonucleotide pyrophosphatase/phosphodiesterase 1 OS=Magnaporthe oryzae (strain 70-15 / ATCC MYA-4617 / FGSC 8958) GN=MGG_12630 PE=4 SV=1 - [G4NJG3_MAGO7]	5.5	3	3	4	6	745	745	83.3319	6.01123
G4MWF5	Phosphorylcholine phosphatase OS=Magnaporthe oryzae (strain 70-15 / ATCC MYA-4617 / FGSC 8958) GN=MGG_08342 PE=4 SV=1 - [G4MWF5_MAGO7]	10.53	1	2	2	2	361	361	39.8499	5.21143
G4MW98	Uncharacterized protein OS=Magnaporthe oryzae (strain 70-15 / ATCC MYA-4617 / FGSC 8958) GN=MGG_01845 PE=4 SV=1 - [G4MW98_MAGO7]	6.06	1	1	1	3	132	132	14.2075	4.42432
G4N8W4	Uncharacterized protein OS=Magnaporthe oryzae (strain 70-15 / ATCC MYA-4617 / FGSC 8958) GN=MGG_03369 PE=4 SV=1 - [G4N8W4_MAGO7]	6.63	1	1	1	1	196	196	20.8361	4.91943
G4MQW9	U4/U6 snRNA-associated-splicing factor PRP24 OS=Magnaporthe oryzae (strain 70-15 / ATCC MYA-4617 / FGSC 8958) GN=MGG_04727 PE=4 SV=1 - [G4MQW9_MAGO7]	0.88	1	1	1	3	1133	1133	126.293	7.84033
G4NID6	Uncharacterized protein OS=Magnaporthe oryzae (strain 70-15 / ATCC MYA-4617 / FGSC 8958) GN=MGG_17830 PE=4 SV=1 - [G4NID6_MAGO7]	4.12	1	1	1	2	267	267	29.0728	5.40186
G4MR34	Cleavage stimulation factor 64-kDa subunit OS=Magnaporthe oryzae (strain P131) GN=OOW_P131scaffold01201g44 PE=4 SV=1 - [L7IZV3_MAGOP]	5.9	1	1	1	2	305	305	31.8632	5.07178
G5EHC3	Uncharacterized protein OS=Magnaporthe oryzae (strain 70-15 / ATCC MYA-4617 / FGSC 8958) GN=MGCH7_ch7g817 PE=4 SV=1 - [G5EHC3_MAGO7]	5.1	1	1	1	1	255	255	28.7453	7.6792
G4NBG4	60S ribosomal protein L44 OS=Magnaporthe oryzae (strain 70-15 / ATCC MYA-4617 / FGSC 8958) GN=MGG_00546 PE=3 SV=1 - [G4NBG4_MAGO7]	8.49	1	2	2	12	106	106	12.0525	10.3159
G4MVQ1	Uncharacterized protein OS=Magnaporthe oryzae (strain 70-15 / ATCC MYA-4617 / FGSC 8958) GN=MGG_01772 PE=4 SV=1 - [G4MVQ1_MAGO7]	5.78	1	1	1	4	173	173	18.6923	7.31299
G4NDW7	DL-glycerol-3-phosphatase 1 OS=Magnaporthe oryzae (strain 70-15 / ATCC MYA-4617 / FGSC 8958) GN=MGG_00187 PE=4 SV=1 - [G4NDW7_MAGO7]	11.07	1	2	2	2	244	244	25.9394	4.98291
G4N2A6	Uncharacterized protein OS=Magnaporthe oryzae (strain 70-15 / ATCC MYA-4617 / FGSC 8958) GN=MGG_12979 PE=4 SV=1 - [G4N2A6_MAGO7]	12.66	1	6	6	9	545	545	60.7436	4.90674
G4N7I6	Uncharacterized protein OS=Magnaporthe oryzae (strain P131) GN=OOW_P131scaffold00402g10 PE=4 SV=1 - [L7JEK8_MAGOP]	7.09	2	1	1	2	141	141	14.9598	9.74463
G4MPS0	Phosphatase DCR2 OS=Magnaporthe oryzae (strain 70-15 / ATCC MYA-4617 / FGSC 8958) GN=MGG_09209 PE=4 SV=1 - [G4MPS0_MAGO7]	8.96	2	5	5	8	558	558	62.2053	6.43018
G4MS22	Uncharacterized protein OS=Magnaporthe oryzae (strain 70-15 / ATCC MYA-4617 / FGSC 8958) GN=MGG_10665 PE=4 SV=1 - [G4MS22_MAGO7]	27.27	3	4	4	6	198	198	21.0453	4.50049
G4MV87	Electron transfer flavoprotein subunit alpha OS=Magnaporthe oryzae (strain 70-15 / ATCC MYA-4617 / FGSC 8958) GN=MGG_01719 PE=4 SV=1 - [G4MV87_MAGO7]	9.51	1	2	2	2	347	347	35.5997	6.27783
G4MR74	Amino transferase OS=Magnaporthe oryzae (strain 70-15 / ATCC MYA-4617 / FGSC 8958) GN=MGG_09919 PE=4 SV=1 - [G4MR74_MAGO7]	19.93	2	9	9	20	587	587	65.0245	6.15088
G4MRF0	Uncharacterized protein OS=Magnaporthe oryzae (strain P131) GN=OOW_P131scaffold00408g5 PE=4 SV=1 - [L7JDU4_MAGOP]	10.7	1	4	4	6	542	542	55.7827	9.51025
G4N7G3	Signal recognition particle 14 kDa protein OS=Magnaporthe oryzae PE=2 SV=1 - [D4NXD3_MAGOR]	51.97	1	4	4	8	127	127	13.8164	9.87646
G4NBT8	60S ribosome subunit biogenesis protein NIP7 OS=Magnaporthe oryzae (strain 70-15 / ATCC MYA-4617 / FGSC 8958) GN=MGG_00482 PE=3 SV=1 - [G4NBT8_MAGO7]	5.95	1	1	1	1	185	185	20.6516	8.66064
G4MKP2	Phosphoglycerate mutase family domain-containing protein OS=Magnaporthe oryzae (strain P131) GN=OOW_P131scaffold00343g28 PE=4 SV=1 - [L7JFR1_MAGOP]	5.06	1	3	3	3	633	633	70.1992	6.3667
G4N4Y7	Uncharacterized protein OS=Magnaporthe oryzae (strain 70-15 / ATCC MYA-4617 / FGSC 8958) GN=MGG_16750 PE=4 SV=1 - [G4N4Y7_MAGO7]	10.22	3	1	1	1	137	137	14.7554	5.07178
G4NA76	Sugar transporter OS=Magnaporthe oryzae (strain 70-15 / ATCC MYA-4617 / FGSC 8958) GN=MGG_08446 PE=3 SV=1 - [G4NA76_MAGO7]	5.46	2	2	2	3	531	531	59.8445	8.29443
G4MVK1	Long chain fatty acid oxidase OS=Magnaporthe oryzae (strain P131) GN=OOW_P131scaffold01214g15 PE=4 SV=1 - [L7IZ92_MAGOP]	12.58	2	6	6	7	763	763	82.2984	7.59131
G4MP97	Uncharacterized protein OS=Magnaporthe oryzae (strain 70-15 / ATCC MYA-4617 / FGSC 8958) GN=MGG_07005 PE=4 SV=1 - [G4MP97_MAGO7]	5.65	1	2	2	9	283	283	27.8531	4.2085
G4NH29	RuvB-like helicase OS=Magnaporthe oryzae (strain 70-15 / ATCC MYA-4617 / FGSC 8958) GN=MGG_03958 PE=3 SV=1 - [G4NH29_MAGO7]	9.59	2	4	4	5	459	459	49.8953	6.40479
G4MND1	Uncharacterized protein OS=Magnaporthe oryzae (strain 70-15 / ATCC MYA-4617 / FGSC 8958) GN=MGG_16211 PE=4 SV=1 - [G4MND1_MAGO7]	3.17	1	1	1	2	315	315	34.9492	9.31982
G4NH36	Uncharacterized protein OS=Magnaporthe oryzae (strain P131) GN=OOW_P131scaffold01026g2 PE=4 SV=1 - [L7J5C1_MAGOP]	3.32	1	1	1	3	271	271	30.459	9.70068
G4ND64	Phospholipase D1 OS=Magnaporthe oryzae (strain P131) GN=OOW_P131scaffold00114g24 PE=4 SV=1 - [L7JNN5_MAGOP]	2.19	1	3	3	4	1646	1646	186.309	7.25439
G4MNT3	Gamma-glutamyltransferase OS=Magnaporthe oryzae (strain 70-15 / ATCC MYA-4617 / FGSC 8958) GN=MGG_02134 PE=4 SV=1 - [G4MNT3_MAGO7]	9.19	3	5	5	7	566	566	60.4307	9.23193
G5EGX2	Uncharacterized protein OS=Magnaporthe oryzae (strain 70-15 / ATCC MYA-4617 / FGSC 8958) GN=MGCH7_ch7g383 PE=4 SV=1 - [G5EGX2_MAGO7]	3.86	1	1	1	1	389	389	42.4103	8.29443
G4N9J6	Betaine aldehyde dehydrogenase OS=Magnaporthe oryzae (strain 70-15 / ATCC MYA-4617 / FGSC 8958) GN=MGG_03263 PE=3 SV=1 - [G4N9J6_MAGO7]	4.95	1	2	2	4	485	485	51.9934	5.65576
G4MUG8	Uncharacterized protein OS=Magnaporthe oryzae (strain 70-15 / ATCC MYA-4617 / FGSC 8958) GN=MGG_07246 PE=4 SV=1 - [G4MUG8_MAGO7]	11.56	3	2	2	2	199	199	21.7376	5.56689
G4MYI2	Ribosome biogenesis protein RPF2 OS=Magnaporthe oryzae (strain 70-15 / ATCC MYA-4617 / FGSC 8958) GN=MGG_10382 PE=4 SV=1 - [G4MYI2_MAGO7]	5.21	1	2	2	2	326	326	36.6983	9.86182
G4N7D9	Uncharacterized protein OS=Magnaporthe oryzae (strain 70-15 / ATCC MYA-4617 / FGSC 8958) GN=MGG_03593 PE=4 SV=1 - [G4N7D9_MAGO7]	9.59	1	2	2	3	344	344	33.7998	5.75732
G4N6L6	Vacuolar protein sorting-associated protein 13 OS=Magnaporthe oryzae (strain 70-15 / ATCC MYA-4617 / FGSC 8958) GN=MGG_06537 PE=4 SV=1 - [G4N6L6_MAGO7]	1.27	1	4	4	5	3223	3223	361.2	6.04932
P0CT09	Actin cytoskeleton-regulatory complex protein END3 OS=Magnaporthe oryzae (strain Y34) GN=END3 PE=2 SV=1 - [END3_MAGOY]	7.07	1	2	2	3	396	396	44.8925	5.33838
G4NHX9	Uncharacterized protein OS=Magnaporthe oryzae (strain 70-15 / ATCC MYA-4617 / FGSC 8958) GN=MGG_09402 PE=4 SV=1 - [G4NHX9_MAGO7]	4.35	1	1	1	2	207	207	22.1108	9.61279
G4MTJ5	Sphingosine-1-phosphate lyase OS=Magnaporthe oryzae (strain 70-15 / ATCC MYA-4617 / FGSC 8958) GN=MGG_07162 PE=3 SV=1 - [G4MTJ5_MAGO7]	2.47	1	1	1	1	567	567	61.8263	9.02686
G4N7U4	Dynamin-A OS=Magnaporthe oryzae (strain P131) GN=OOW_P131scaffold00505g3 PE=3 SV=1 - [L7JCR1_MAGOP]	4.49	1	3	4	5	802	802	88.2677	6.91748
G4NIT8	Guanine deaminase OS=Magnaporthe oryzae (strain 70-15 / ATCC MYA-4617 / FGSC 8958) GN=MGG_04119 PE=4 SV=1 - [G4NIT8_MAGO7]	7.1	1	4	4	6	535	535	57.4967	5.60498
G4MM01	Alpha-L-fucosidase 1 OS=Magnaporthe oryzae (strain P131) GN=OOW_P131scaffold01049g3 PE=4 SV=1 - [L7J3H0_MAGOP]	12.33	1	4	4	5	519	519	58.0125	5.42725
G4NBU6	Meiotic chromosome segregation protein OS=Magnaporthe oryzae (strain 70-15 / ATCC MYA-4617 / FGSC 8958) GN=MGG_10785 PE=4 SV=1 - [G4NBU6_MAGO7]	3.86	2	1	1	1	311	311	34.111	6.37939
G4N4E6	Transmembrane domain-containing protein OS=Magnaporthe oryzae (strain 70-15 / ATCC MYA-4617 / FGSC 8958) GN=MGG_05097 PE=4 SV=1 - [G4N4E6_MAGO7]	9.68	1	2	2	5	186	186	20.7149	9.26123
G4ND55	Asparagine synthetase OS=Magnaporthe oryzae (strain 70-15 / ATCC MYA-4617 / FGSC 8958) GN=MGG_00969 PE=4 SV=1 - [G4ND55_MAGO7]	7.2	1	4	4	5	583	583	65.81	6.11279
G4MYU6	Elongation factor Tu OS=Magnaporthe oryzae (strain P131) GN=OOW_P131scaffold01180g12 PE=3 SV=1 - [L7J0Z9_MAGOP]	8.13	1	3	3	7	443	443	48.8422	7.35693
G5EHC5	Uncharacterized protein OS=Magnaporthe oryzae (strain 70-15 / ATCC MYA-4617 / FGSC 8958) GN=MGCH7_ch7g248 PE=4 SV=1 - [G5EHC5_MAGO7]	7.71	1	4	4	7	545	545	57.6427	9.02686
G4NID0	Uncharacterized protein OS=Magnaporthe oryzae (strain 70-15 / ATCC MYA-4617 / FGSC 8958) GN=MGG_17828 PE=4 SV=1 - [G4NID0_MAGO7]	2.51	2	1	1	2	358	358	38.1946	6.87354
G4NC96	DUF974 domain-containing protein OS=Magnaporthe oryzae (strain P131) GN=OOW_P131scaffold00304g37 PE=4 SV=1 - [L7JIF6_MAGOP]	5.01	1	1	2	5	339	339	36.4452	5.46533
G4MQI9	Uncharacterized protein OS=Magnaporthe oryzae (strain 70-15 / ATCC MYA-4617 / FGSC 8958) GN=MGG_16099 PE=4 SV=1 - [G4MQI9_MAGO7]	9.42	2	3	3	5	308	308	32.8209	5.8208
G4MKM4	Uncharacterized protein OS=Magnaporthe oryzae (strain 70-15 / ATCC MYA-4617 / FGSC 8958) GN=MGG_16531 PE=4 SV=1 - [G4MKM4_MAGO7]	1.93	2	1	1	2	517	517	55.0199	6.21436
G4MZ50	Uncharacterized protein OS=Magnaporthe oryzae (strain 70-15 / ATCC MYA-4617 / FGSC 8958) GN=MGG_01383 PE=4 SV=1 - [G4MZ50_MAGO7]	3.54	1	1	1	3	396	396	41.8303	6.41748
G4NCV5	ISWI chromatin-remodeling complex ATPase ISW2 OS=Magnaporthe oryzae (strain P131) GN=OOW_P131scaffold01132g20 PE=4 SV=1 - [L7J1A4_MAGOP]	4.08	1	4	4	8	1128	1128	128.43	6.85889
G4N514	Heavy metal tolerance protein OS=Magnaporthe oryzae (strain 70-15 / ATCC MYA-4617 / FGSC 8958) GN=MGG_05190 PE=4 SV=1 - [G4N514_MAGO7]	3.31	3	3	3	3	1028	1028	114.572	8.51416
G4NGD5	Cytochrome P450 17A1 OS=Magnaporthe oryzae (strain 70-15 / ATCC MYA-4617 / FGSC 8958) GN=MGG_04345 PE=3 SV=1 - [G4NGD5_MAGO7]	2.08	2	1	1	1	530	530	59.7547	8.57275
G4N8F8	Uncharacterized protein OS=Magnaporthe oryzae (strain P131) GN=OOW_P131scaffold01189g10 PE=4 SV=1 - [L7J1F7_MAGOP]	6.7	1	1	1	5	179	179	20.7362	6.15088
G4NCA2	Peptidyl-tRNA hydrolase 2 OS=Magnaporthe oryzae (strain 70-15 / ATCC MYA-4617 / FGSC 8958) GN=MGG_01099 PE=4 SV=1 - [G4NCA2_MAGO7]	4.86	2	1	1	2	247	247	26.1296	6.25244
G4NHH4	2-oxoisovalerate dehydrogenase subunit alpha OS=Magnaporthe oryzae (strain 70-15 / ATCC MYA-4617 / FGSC 8958) GN=MGG_03840 PE=4 SV=1 - [G4NHH4_MAGO7]	4.1	1	2	2	3	463	463	52.1067	7.25439
G4NGN8	Class III chitinase OS=Magnaporthe oryzae (strain 70-15 / ATCC MYA-4617 / FGSC 8958) GN=MGG_04073 PE=4 SV=1 - [G4NGN8_MAGO7]	8.67	1	3	3	4	369	369	41.0933	5.31299
G4N6T8	Uncharacterized protein OS=Magnaporthe oryzae (strain P131) GN=OOW_P131scaffold01168g8 PE=4 SV=1 - [L7J076_MAGOP]	32.56	1	3	3	5	129	129	13.9721	9.33447
G4NJ63	Uncharacterized protein OS=Magnaporthe oryzae (strain 70-15 / ATCC MYA-4617 / FGSC 8958) GN=MGG_02734 PE=4 SV=1 - [G4NJ63_MAGO7]	1.81	1	1	1	2	497	497	53.5793	6.20166
G4MTB4	Uncharacterized protein OS=Magnaporthe oryzae (strain Y34) GN=OOU_Y34scaffold00194g106 PE=4 SV=1 - [L7IHR0_MAGOY]	11.26	2	4	4	4	444	444	49.7457	5.73193
G4NCU0	Hydroxymethylglutaryl-CoA synthase OS=Magnaporthe oryzae (strain 70-15 / ATCC MYA-4617 / FGSC 8958) GN=MGG_01026 PE=4 SV=1 - [G4NCU0_MAGO7]	11.4	1	4	4	5	456	456	49.9328	6.55127
G4MRZ6	Uncharacterized protein OS=Magnaporthe oryzae (strain 70-15 / ATCC MYA-4617 / FGSC 8958) GN=MGG_02481 PE=4 SV=1 - [G4MRZ6_MAGO7]	2.69	2	2	2	6	931	931	101.408	5.84619
G4MLR0	Galactokinase OS=Magnaporthe oryzae (strain 70-15 / ATCC MYA-4617 / FGSC 8958) GN=MGG_05440 PE=4 SV=1 - [G4MLR0_MAGO7]	8.4	1	3	3	4	524	524	56.0424	5.46533
G4MTM1	Uncharacterized protein OS=Magnaporthe oryzae (strain 70-15 / ATCC MYA-4617 / FGSC 8958) GN=MGG_07182 PE=4 SV=1 - [G4MTM1_MAGO7]	3.08	1	1	1	2	357	357	39.3896	8.79248
G4MKJ7	Cytochrome P450 97B3 OS=Magnaporthe oryzae (strain 70-15 / ATCC MYA-4617 / FGSC 8958) GN=MGG_04469 PE=4 SV=1 - [G4MKJ7_MAGO7]	7.14	1	4	4	7	602	602	66.8802	8.92432
G4NB20	Uncharacterized protein OS=Magnaporthe oryzae (strain 70-15 / ATCC MYA-4617 / FGSC 8958) GN=MGG_00650 PE=4 SV=1 - [G4NB20_MAGO7]	16.37	1	2	2	2	171	171	18.3077	9.74463
G4NK63	Medium-chain specific acyl-CoA dehydrogenase OS=Magnaporthe oryzae (strain 70-15 / ATCC MYA-4617 / FGSC 8958) GN=MGG_15041 PE=3 SV=1 - [G4NK63_MAGO7]	1.83	1	1	1	4	383	383	41.4618	10.5796
G4N9F1	Uncharacterized protein OS=Magnaporthe oryzae (strain 70-15 / ATCC MYA-4617 / FGSC 8958) GN=MGG_03301 PE=4 SV=1 - [G4N9F1_MAGO7]	18.49	1	3	3	4	265	265	28.8042	5.37646
G4MKE9	Agmatinase 1 OS=Magnaporthe oryzae (strain 70-15 / ATCC MYA-4617 / FGSC 8958) GN=MGG_10533 PE=3 SV=1 - [G4MKE9_MAGO7]	10.17	1	2	2	2	423	423	45.2218	5.85889
G4N558	Uncharacterized protein OS=Magnaporthe oryzae (strain 70-15 / ATCC MYA-4617 / FGSC 8958) GN=MGG_13222 PE=4 SV=1 - [G4N558_MAGO7]	6.46	2	2	2	2	526	526	54.406	4.98291
G4ML52	Uncharacterized protein OS=Magnaporthe oryzae (strain 70-15 / ATCC MYA-4617 / FGSC 8958) GN=MGG_06692 PE=4 SV=1 - [G4ML52_MAGO7]	8.75	2	2	2	2	263	263	29.1118	5.75732
G4NHC8	Haloacid dehalogenase OS=Magnaporthe oryzae (strain 70-15 / ATCC MYA-4617 / FGSC 8958) GN=MGG_14936 PE=4 SV=1 - [G4NHC8_MAGO7]	8.46	1	2	2	2	260	260	27.5899	5.03369
G4MW08	Quinate permease OS=Magnaporthe oryzae (strain 70-15 / ATCC MYA-4617 / FGSC 8958) GN=MGG_08937 PE=3 SV=1 - [G4MW08_MAGO7]	5.02	1	2	2	3	538	538	58.7381	7.63525
G4NFN0	Uncharacterized protein OS=Magnaporthe oryzae (strain 70-15 / ATCC MYA-4617 / FGSC 8958) GN=MGG_08772 PE=4 SV=1 - [G4NFN0_MAGO7]	16.01	2	3	3	4	306	306	31.6939	8.80713
G4N065	Carboxypeptidase A OS=Magnaporthe oryzae (strain 70-15 / ATCC MYA-4617 / FGSC 8958) GN=MGG_07704 PE=4 SV=1 - [G4N065_MAGO7]	8.8	1	3	3	5	443	443	48.1844	6.37939
G4MZA6	Amidohydrolase OS=Magnaporthe oryzae (strain 70-15 / ATCC MYA-4617 / FGSC 8958) GN=MGG_08206 PE=4 SV=1 - [G4MZA6_MAGO7]	6.07	2	2	2	2	346	346	38.9015	5.19873
G4ND90	Uncharacterized protein OS=Magnaporthe oryzae (strain 70-15 / ATCC MYA-4617 / FGSC 8958) GN=MGG_11611 PE=4 SV=1 - [G4ND90_MAGO7]	3.54	2	1	1	1	508	508	53.9143	6.15088
G4MT05	Bystin OS=Magnaporthe oryzae (strain P131) GN=OOW_P131scaffold00219g4 PE=4 SV=1 - [L7JKJ6_MAGOP]	2.27	1	1	1	1	485	485	53.5163	5.05908
G4N1B3	Homoserine kinase OS=Magnaporthe oryzae (strain P131) GN=OOW_P131scaffold00320g11 PE=3 SV=1 - [L7JGZ5_MAGOP]	3.37	2	1	1	1	356	356	38.1918	5.92236
G4NHJ9	Metalloprotease 1 OS=Magnaporthe oryzae (strain 70-15 / ATCC MYA-4617 / FGSC 8958) GN=MGG_03817 PE=4 SV=1 - [G4NHJ9_MAGO7]	14	3	4	4	25	300	300	33.1393	5.97314
G5EH99	Uncharacterized protein OS=Magnaporthe oryzae (strain 70-15 / ATCC MYA-4617 / FGSC 8958) GN=MGCH7_ch7g127 PE=4 SV=1 - [G5EH99_MAGO7]	2.64	1	1	1	1	379	379	40.9158	8.99756
G4MXS8	DUF410 domain-containing protein OS=Magnaporthe oryzae (strain P131) GN=OOW_P131scaffold00264g24 PE=4 SV=1 - [L7JK42_MAGOP]	8.11	1	2	2	4	333	333	36.0214	6.7124
G5EH08	Uncharacterized protein OS=Magnaporthe oryzae (strain 70-15 / ATCC MYA-4617 / FGSC 8958) GN=MGCH7_ch7g661 PE=4 SV=1 - [G5EH08_MAGO7]	0.84	1	1	1	4	833	833	88.8329	7.91357
G4NEG6	Phospholipid-transporting ATPase OS=Magnaporthe oryzae (strain 70-15 / ATCC MYA-4617 / FGSC 8958) GN=MGG_00111 PE=3 SV=1 - [G4NEG6_MAGO7]	0.4	3	1	1	3	1501	1501	166.75	6.66846
G4N4P0	C2H2 type zinc finger domain-containing protein OS=Magnaporthe oryzae (strain Y34) GN=OOU_Y34scaffold00516g10 PE=4 SV=1 - [L7I732_MAGOY]	1.38	1	2	2	3	726	726	78.3386	7.02002
G4NAD4	RNA polymerase II transcription factor B subunit 1 OS=Magnaporthe oryzae (strain P131) GN=OOW_P131scaffold01199g44 PE=4 SV=1 - [L7IZ28_MAGOP]	1.53	1	1	1	1	653	653	71.3542	6.354
G4N531	Transcription initiation factor TFIID subunit 14 OS=Magnaporthe oryzae (strain 70-15 / ATCC MYA-4617 / FGSC 8958) GN=MGG_05204 PE=4 SV=1 - [G4N531_MAGO7]	14.47	3	2	2	2	228	228	26.2461	6.03662
G4N9J4	mRNA 3'-end-processing protein RNA-14 OS=Magnaporthe oryzae (strain 70-15 / ATCC MYA-4617 / FGSC 8958) GN=MGG_03265 PE=4 SV=1 - [G4N9J4_MAGO7]	4.54	1	4	4	5	1057	1057	117.505	6.22705
G4N732	Uncharacterized protein OS=Magnaporthe oryzae (strain 70-15 / ATCC MYA-4617 / FGSC 8958) GN=MGG_03627 PE=4 SV=1 - [G4N732_MAGO7]	18.25	2	3	3	5	274	274	30.703	9.01221
G4MTL1	Elongator complex protein 1 OS=Magnaporthe oryzae (strain 70-15 / ATCC MYA-4617 / FGSC 8958) GN=MGG_07174 PE=3 SV=1 - [G4MTL1_MAGO7]	2.68	1	4	4	5	1305	1305	142.373	5.74463
G4NEA7	Palmitoyltransferase OS=Magnaporthe oryzae (strain P131) GN=OOW_P131scaffold00602g14 PE=3 SV=1 - [L7J8L6_MAGOP]	5.45	1	2	2	3	422	422	47.6951	8.67529
G4N3K8	Uncharacterized protein OS=Magnaporthe oryzae (strain 70-15 / ATCC MYA-4617 / FGSC 8958) GN=MGG_04990 PE=4 SV=1 - [G4N3K8_MAGO7]	9.57	2	3	3	5	491	491	54.2424	5.12256
G4MN16	Uracil phosphoribosyltransferase OS=Magnaporthe oryzae (strain 70-15 / ATCC MYA-4617 / FGSC 8958) GN=MGG_06915 PE=4 SV=1 - [G4MN16_MAGO7]	7.82	2	2	2	2	243	243	26.8761	6.78564
G4MRG5	Vesicular-fusion protein SEC18 OS=Magnaporthe oryzae (strain 70-15 / ATCC MYA-4617 / FGSC 8958) GN=MGG_02418 PE=4 SV=1 - [G4MRG5_MAGO7]	3.35	1	2	3	3	835	835	90.6476	6.58057
G4MKB6	50S ribosomal protein L3 OS=Magnaporthe oryzae (strain 70-15 / ATCC MYA-4617 / FGSC 8958) GN=MGG_02511 PE=4 SV=1 - [G4MKB6_MAGO7]	3.61	2	1	1	1	388	388	42.0723	11.1948
G4N4S2	Dihydrodipicolinate synthase OS=Magnaporthe oryzae (strain 70-15 / ATCC MYA-4617 / FGSC 8958) GN=MGG_05159 PE=3 SV=1 - [G4N4S2_MAGO7]	25.16	1	7	7	7	322	322	34.1167	6.26514
G4MYJ5	Uncharacterized protein OS=Magnaporthe oryzae (strain 70-15 / ATCC MYA-4617 / FGSC 8958) GN=MGG_01304 PE=4 SV=1 - [G4MYJ5_MAGO7]	1.75	2	1	1	2	515	515	54.7866	6.18896
Q2KGW7	Uncharacterized protein OS=Magnaporthe oryzae GN=7bg7.4 PE=4 SV=1 - [H2DQQ1_MAGOR]	1.09	2	1	2	3	1193	1193	132.866	6.771
G4MWS4	Dienelactone hydrolase OS=Magnaporthe oryzae (strain 70-15 / ATCC MYA-4617 / FGSC 8958) GN=MGG_08330 PE=4 SV=1 - [G4MWS4_MAGO7]	8.59	2	2	2	5	256	256	28.2113	6.15088
G4NA20	Uncharacterized protein OS=Magnaporthe oryzae (strain 70-15 / ATCC MYA-4617 / FGSC 8958) GN=MGG_09764 PE=4 SV=1 - [G4NA20_MAGO7]	2.36	1	1	1	2	381	381	42.5102	8.01611
G4MZ10	Uncharacterized protein OS=Magnaporthe oryzae (strain P131) GN=OOW_P131scaffold00131g1 PE=4 SV=1 - [L7JPB0_MAGOP]	5.19	3	1	1	5	212	212	23.7824	7.07861
G4NEE8	Saccharopine dehydrogenase OS=Magnaporthe oryzae (strain 70-15 / ATCC MYA-4617 / FGSC 8958) GN=MGG_00127 PE=4 SV=1 - [G4NEE8_MAGO7]	8.16	1	3	3	5	429	429	47.1163	8.82178
G4MT72	Glycosyl hydrolase OS=Magnaporthe oryzae (strain P131) GN=OOW_P131scaffold00922g9 PE=4 SV=1 - [L7J8K9_MAGOP]	6.05	2	4	5	8	892	892	98.0053	6.23975
G4MX56	D-amino-acid oxidase OS=Magnaporthe oryzae (strain 70-15 / ATCC MYA-4617 / FGSC 8958) GN=MGG_08011 PE=4 SV=1 - [G4MX56_MAGO7]	6.06	1	2	2	3	363	363	39.6169	5.70654
A4RQ11	Probable Xaa-Pro aminopeptidase MGG_05684 OS=Magnaporthe oryzae (strain 70-15 / ATCC MYA-4617 / FGSC 8958) GN=MGG_05684 PE=3 SV=1 - [AMPP2_MAGO7]	3.99	1	3	3	6	526	526	58.451	6.65381
G4MW33	Glycosyltransferase family 28 domain-containing protein, variant OS=Magnaporthe oryzae (strain 70-15 / ATCC MYA-4617 / FGSC 8958) GN=MGG_08954 PE=4 SV=1 - [G4MW33_MAGO7]	2.63	4	2	2	3	647	647	69.2775	8.70459
G4NH43	Acetolactate synthase OS=Magnaporthe oryzae (strain 70-15 / ATCC MYA-4617 / FGSC 8958) GN=MGG_03945 PE=3 SV=1 - [G4NH43_MAGO7]	2.62	2	1	1	1	573	573	61.9487	6.03662
G4N3V0	N-carbamoyl-L-amino acid hydrolase OS=Magnaporthe oryzae (strain P131) GN=OOW_P131scaffold00266g58 PE=4 SV=1 - [L7JIY2_MAGOP]	7.79	2	3	3	3	462	462	50.3391	5.89697
G4MKS3	Charged multivesicular body protein 3 OS=Magnaporthe oryzae (strain 70-15 / ATCC MYA-4617 / FGSC 8958) GN=MGG_06670 PE=3 SV=1 - [G4MKS3_MAGO7]	5.98	2	1	1	4	234	234	26.0905	5.47803
G4MQR8	Secretory lipase OS=Magnaporthe oryzae (strain 70-15 / ATCC MYA-4617 / FGSC 8958) GN=MGG_14628 PE=4 SV=1 - [G4MQR8_MAGO7]	6.37	1	2	2	2	471	471	50.5253	5.90967
G4MKB8	Uncharacterized protein OS=Magnaporthe oryzae (strain 70-15 / ATCC MYA-4617 / FGSC 8958) GN=MGG_02513 PE=4 SV=1 - [G4MKB8_MAGO7]	3.25	1	1	1	2	246	246	26.2758	7.95752
G4MSE2	Glycolipid 2-alpha-mannosyltransferase OS=Magnaporthe oryzae (strain P131) GN=OOW_P131scaffold01358g37 PE=4 SV=1 - [L7ITY8_MAGOP]	6.09	2	3	3	5	394	394	46.0603	6.59521
G4MZ54	Choline transport protein OS=Magnaporthe oryzae (strain P131) GN=OOW_P131scaffold00252g15 PE=4 SV=1 - [L7JKN2_MAGOP]	2.03	1	1	1	2	543	543	58.2078	6.52197
G4NG12	Glutamine synthetase OS=Magnaporthe oryzae (strain 70-15 / ATCC MYA-4617 / FGSC 8958) GN=MGG_14279 PE=3 SV=1 - [G4NG12_MAGO7]	10.34	3	4	4	5	358	358	39.6804	6.03662
G4N901	Uncharacterized protein OS=Magnaporthe oryzae (strain 70-15 / ATCC MYA-4617 / FGSC 8958) GN=MGG_13584 PE=4 SV=1 - [G4N901_MAGO7]	2.21	2	1	1	1	542	542	58.6251	6.62451
G4NC31	Eukaryotic peptide chain release factor GTP-binding subunit OS=Magnaporthe oryzae (strain 70-15 / ATCC MYA-4617 / FGSC 8958) GN=MGG_00449 PE=4 SV=1 - [G4NC31_MAGO7]	4.1	1	3	3	4	731	731	79.1378	8.76318
G4NH96	Uncharacterized protein OS=Magnaporthe oryzae (strain P131) GN=OOW_P131scaffold00303g25 PE=3 SV=1 - [L7JHG8_MAGOP]	8.49	1	1	1	1	106	106	12.105	4.76709
G4NF79	Uncharacterized protein OS=Magnaporthe oryzae (strain P131) GN=OOW_P131scaffold01057g20 PE=4 SV=1 - [L7J472_MAGOP]	3.71	1	2	2	2	647	647	72.0651	6.15088
G4NC20	Caltractin OS=Magnaporthe oryzae (strain P131) GN=OOW_P131scaffold00225g23 PE=4 SV=1 - [L7JM22_MAGOP]	5	2	1	1	1	180	180	20.4874	5.14795
G4MZP5	Succinate dehydrogenase assembly factor 2, mitochondrial OS=Magnaporthe oryzae (strain 70-15 / ATCC MYA-4617 / FGSC 8958) GN=MGG_07034 PE=3 SV=1 - [G4MZP5_MAGO7]	3.81	1	1	1	1	236	236	25.9031	9.36377
G4MPV2	UDP-4-keto-6-deoxyglucose-3, 5-epimerase/-4-reductase OS=Magnaporthe oryzae PE=2 SV=1 - [F8U970_MAGOR]	14.04	1	4	4	4	292	292	33.0504	7.02002
G4N1P5	Uncharacterized protein OS=Magnaporthe oryzae (strain 70-15 / ATCC MYA-4617 / FGSC 8958) GN=MGG_07511 PE=4 SV=1 - [G4N1P5_MAGO7]	3.4	2	1	1	1	324	324	36.8155	8.80713
G4N9V0	GTPase-activating protein GYP5 OS=Magnaporthe oryzae (strain 70-15 / ATCC MYA-4617 / FGSC 8958) GN=MGG_03253 PE=4 SV=1 - [G4N9V0_MAGO7]	1.7	1	2	2	2	942	942	103.395	5.31299
G4NBX7	DNA-directed RNA polymerase subunit OS=Magnaporthe oryzae (strain P131) GN=OOW_P131scaffold00746g4 PE=3 SV=1 - [L7J7U4_MAGOP]	2.5	1	4	4	4	1719	1719	190.594	6.88818
G4MUF5	Helix-loop-helix DNA binding protein OS=Magnaporthe oryzae (strain P131) GN=OOW_P131scaffold01287g16 PE=4 SV=1 - [L7IY52_MAGOP]	7.74	1	2	2	2	310	310	33.6195	5.0083
G4MN04	Signal recognition particle subunit SRP72 OS=Magnaporthe oryzae (strain 70-15 / ATCC MYA-4617 / FGSC 8958) GN=MGG_06904 PE=3 SV=1 - [G4MN04_MAGO7]	4.92	1	3	3	3	671	671	72.6885	8.1626
Q2KFH4	Putative uncharacterized protein OS=Magnaporthe oryzae (strain 70-15 / ATCC MYA-4617 / FGSC 8958) GN=MGCH7_ch7g712 PE=4 SV=1 - [Q2KFH4_MAGO7]	2.22	3	1	1	2	450	450	48.95	6.66846
G4NLW7	Short-chain dehydrogenase OS=Magnaporthe oryzae (strain 70-15 / ATCC MYA-4617 / FGSC 8958) GN=MGG_02825 PE=4 SV=1 - [G4NLW7_MAGO7]	15.74	2	2	3	4	235	235	25.6865	7.48877
G4N7F6	LYR family protein OS=Magnaporthe oryzae (strain 70-15 / ATCC MYA-4617 / FGSC 8958) GN=MGG_03576 PE=3 SV=1 - [G4N7F6_MAGO7]	43.56	2	5	5	7	101	101	11.6682	9.99365
G4MQ14	Uncharacterized protein OS=Magnaporthe oryzae (strain 70-15 / ATCC MYA-4617 / FGSC 8958) GN=MGG_02246 PE=4 SV=1 - [G4MQ14_MAGO7]	21.18	1	1	1	1	85	85	9.02643	5.24951
G4MTE0	54S ribosomal protein L3 OS=Magnaporthe oryzae (strain P131) GN=OOW_P131scaffold00219g30 PE=4 SV=1 - [L7JKL9_MAGOP]	6.05	1	3	3	7	413	413	45.4384	9.0708
G4MMK8	Uncharacterized protein OS=Magnaporthe oryzae (strain 70-15 / ATCC MYA-4617 / FGSC 8958) GN=MGG_06872 PE=3 SV=1 - [G4MMK8_MAGO7]	5.84	2	3	3	3	668	668	74.561	6.55127
G4N6T5	Uncharacterized protein OS=Magnaporthe oryzae (strain 70-15 / ATCC MYA-4617 / FGSC 8958) GN=MGG_03666 PE=4 SV=1 - [G4N6T5_MAGO7]	11.18	2	2	2	2	161	161	18.0303	6.80029
G4NF82	Uncharacterized protein OS=Magnaporthe oryzae (strain P131) GN=OOW_P131scaffold01057g16 PE=4 SV=1 - [L7J544_MAGOP]	8.09	2	2	2	2	309	309	34.5061	5.021
G4MRX8	Delta(24(24(1)))-sterol reductase OS=Magnaporthe oryzae (strain 70-15 / ATCC MYA-4617 / FGSC 8958) GN=MGG_02465 PE=4 SV=1 - [G4MRX8_MAGO7]	8.33	1	4	4	4	588	588	67.1263	7.47412
G4MUE4	Uncharacterized protein OS=Magnaporthe oryzae (strain 70-15 / ATCC MYA-4617 / FGSC 8958) GN=MGG_01652 PE=4 SV=1 - [G4MUE4_MAGO7]	11.11	1	1	1	1	117	117	13.4872	8.89502
G4NGV1	Serine/threonine protein phosphatase 2A OS=Magnaporthe oryzae (strain 70-15 / ATCC MYA-4617 / FGSC 8958) GN=MGG_12130 PE=4 SV=1 - [G4NGV1_MAGO7]	7.46	2	4	4	7	670	670	75.9914	7.00537
G4NHB7	SNARE domain-containing protein OS=Magnaporthe oryzae (strain P131) GN=OOW_P131scaffold01181g11 PE=3 SV=1 - [L7IZV8_MAGOP]	12.7	2	2	2	2	244	244	27.6462	5.0083
G4MZ72	SIS1 OS=Magnaporthe oryzae PE=2 SV=1 - [B2ZDZ8_MAGOR]	6.2	1	2	2	3	371	371	40.2905	9.17334
G4NAG7	Lactose permease, variant OS=Magnaporthe oryzae (strain 70-15 / ATCC MYA-4617 / FGSC 8958) GN=MGG_09728 PE=3 SV=1 - [G4NAG7_MAGO7]	3.42	2	1	1	1	468	468	51.5815	7.02002
G4MUR5	Uncharacterized protein OS=Magnaporthe oryzae (strain 70-15 / ATCC MYA-4617 / FGSC 8958) GN=MGG_08827 PE=4 SV=1 - [G4MUR5_MAGO7]	1.21	2	1	1	2	742	742	79.7038	6.55127
G4NK78	Homoserine O-acetyltransferase OS=Magnaporthe oryzae (strain 70-15 / ATCC MYA-4617 / FGSC 8958) GN=MGG_14202 PE=3 SV=1 - [G4NK78_MAGO7]	3.88	2	2	2	2	515	515	56.202	7.2251
G4N3K6	Structural maintenance of chromosomes protein OS=Magnaporthe oryzae (strain 70-15 / ATCC MYA-4617 / FGSC 8958) GN=MGG_04988 PE=3 SV=1 - [G4N3K6_MAGO7]	1.41	2	2	2	2	1204	1204	138.039	6.90283
G4N0C2	Peptidyl-prolyl cis-trans isomerase OS=Magnaporthe oryzae (strain P131) GN=OOW_P131scaffold01585g9 PE=4 SV=1 - [L7ITD7_MAGOP]	26.7	2	3	3	4	176	176	19.5968	8.1626
G4N935	Uncharacterized protein OS=Magnaporthe oryzae (strain 70-15 / ATCC MYA-4617 / FGSC 8958) GN=MGG_10057 PE=4 SV=1 - [G4N935_MAGO7]	3.82	1	1	1	1	288	288	31.2455	8.73389
G4ND04	Uncharacterized protein OS=Magnaporthe oryzae (strain P131) GN=OOW_P131scaffold00495g8 PE=4 SV=1 - [L7JB68_MAGOP]	3.73	2	1	1	2	241	241	26.5552	7.10791
[truncated: 1,317 more rows]
