# Supplementary material for: Screening of Candidate Effectors from Magnaporthe oryzae by In Vitro Secretomic Analysis
Source: Int J Mol Sci. 2023 Feb 6;24(4):3189. doi: 10.3390/ijms24043189 (PMC9962664; doi:10.3390/ijms24043189)
Supplement: Supplementary file 1 [file ijms-24-03189-s001.zip › Li et al_Supplementary Table S2.xlsx]

## Sheet:  Classical secreted proteins
Table S2. A summary list of classical secreted proteins and non-classical secreted proteins in M. oryzae.
Uniprot Accession Number	Signalp_6.0	WoLF-Psort	TargetP_2.0	TMHMM_2.0	PredGPI
G4N1Z8	SP	extr	S	0	FALSE
G4N3F5	SP	extr	S	0	FALSE
A4QUT2	SP	extr	S	0	FALSE
G4MY35	SP	extr	S	0	FALSE
G4N4L1	SP	extr	S	0	FALSE
G4N9D5	SP	extr	S	0	FALSE
G4MWH8	SP	extr	S	0	FALSE
G4N8X2	SP	extr	S	0	FALSE
G4NET4	SP	extr	S	0	FALSE
Q2KEM0	SP	extr	S	0	FALSE
G4NJI0	SP	extr	S	0	FALSE
G4N0Q4	SP	extr	S	0	FALSE
G4N2A5	SP	extr	S	0	FALSE
G4MVH5	SP	extr	S	0	FALSE
G4N0X0	SP	extr	S	0	FALSE
G4N9V8	SP	extr	S	0	FALSE
G5EHB5	SP	extr	S	0	FALSE
G4NI16	SP	extr	S	0	FALSE
G4MUE7	SP	extr	S	0	FALSE
G4N6A5	SP	extr	S	0	FALSE
G5EH48	SP	extr	S	0	FALSE
G4N5D8	SP	extr	S	0	FALSE
G4MR77	SP	extr	S	0	FALSE
G4N375	SP	extr	S	0	FALSE
G4MV25	SP	extr	S	0	FALSE
G4N8Z2	SP	extr	S	0	FALSE
G4MXQ5	SP	extr	S	0	FALSE
G5EGZ3	SP	extr	S	0	FALSE
G4MPD6	SP	extr	S	0	FALSE
G4NI46	SP	extr	S	0	FALSE
G4MWP1	SP	extr	S	0	FALSE
A4RPY8	SP	extr	S	0	FALSE
G4MYU8	SP	extr	S	0	FALSE
Q2KEU7	SP	extr	S	0	FALSE
G4NIE7	SP	extr	S	0	FALSE
G4NGD7	SP	extr	S	0	FALSE
G4NAN2	SP	extr	S	0	FALSE
G4NEG2	SP	extr	S	0	FALSE
Q2KEH7	SP	extr	S	0	FALSE
G4N3J0	SP	extr	S	0	FALSE
G4NFR3	SP	extr	S	0	FALSE
G4NFS5	SP	extr	S	0	FALSE
G4N348	SP	extr	S	0	FALSE
G4MQU0	SP	extr	S	0	FALSE
G4NG27	SP	extr	S	0	FALSE
G4N1Z1	SP	extr	S	0	FALSE
G4N601	SP	extr	S	0	FALSE
A4R640	SP	extr	S	0	FALSE
G4MMA9	SP	extr	S	0	FALSE
G4MQU2	SP	extr	S	0	FALSE
G4NGR9	SP	extr	S	0	FALSE
G4N9A6	SP	extr	S	0	FALSE
G4N9T5	SP	extr	S	0	FALSE
G4N7Z0	SP	extr	S	0	FALSE
G4MKI0	SP	extr	S	0	FALSE
G4NHF6	SP	extr	S	0	FALSE
G4NF62	SP	extr	S	0	FALSE
G4MZ98	SP	extr	S	0	FALSE
G4MXZ8	SP	extr	S	0	FALSE
G4MNS0	SP	extr	S	0	FALSE
G4NL95	SP	extr	S	0	FALSE
G4MKE6	SP	extr	S	0	FALSE
G4MSG8	SP	extr	S	0	FALSE
G4NA12	SP	extr	S	0	FALSE
G4N4K1	SP	extr	S	0	FALSE
G4NLF1	SP	extr	S	0	FALSE
G4NHX7	SP	extr	S	0	FALSE
G4N0I3	SP	extr	S	0	FALSE
G4NAI7	SP	extr	S	0	FALSE
G4N3A3	SP	extr	S	0	FALSE
G4MPA9	SP	extr	S	0	FALSE
G4NBI8	SP	extr	S	0	FALSE
G4NHE3	SP	extr	S	0	FALSE
G4MKY3	SP	extr	S	0	FALSE
G4NKY6	SP	extr	S	0	FALSE
G4NFU2	SP	extr	S	0	FALSE
G4N943	SP	extr	S	0	FALSE
G4MU46	SP	extr	S	0	FALSE
G4NEJ1	SP	extr	S	0	FALSE
G4NL54	SP	extr	S	0	FALSE
G4MU29	SP	extr	S	0	FALSE
G4ND99	SP	extr	S	0	FALSE
G4N121	SP	extr	S	0	FALSE
G4NG45	SP	extr	S	0	FALSE
G4MY25	SP	extr	S	0	FALSE
G4N419	SP	extr	S	0	FALSE
G4NEQ0	SP	extr	S	0	FALSE
Q2KGY9	SP	extr	S	0	FALSE
G4MZV3	SP	extr	S	0	FALSE
G4NHY5	SP	extr	S	0	FALSE
G4NBZ0	SP	extr	S	0	FALSE
G4NG01	SP	extr	S	0	FALSE
G4NGM5	SP	extr	S	0	FALSE
Q2KEQ8	SP	extr	S	0	FALSE
G4N2D1	SP	extr	S	0	FALSE
G4MM69	SP	extr	S	0	FALSE
G4NEQ1	SP	extr	S	0	FALSE
G4MQH4	SP	extr	S	0	FALSE
G4NIA1	SP	extr	S	0	FALSE
G4ND85	SP	extr	S	0	FALSE
G4NC12	SP	extr	S	0	FALSE
G4MX76	SP	extr	S	0	FALSE
G4NAL1	SP	extr	S	0	FALSE
G4N3R4	SP	extr	S	0	FALSE
G4N7U6	SP	extr	S	0	FALSE
G4MXQ4	SP	extr	S	0	FALSE
G4NEK0	SP	extr	S	0	FALSE
G4MVP2	SP	extr	S	0	FALSE
G4NIH0	SP	extr	S	0	FALSE
G4NHQ0	SP	extr	S	0	FALSE
G5EI76	SP	extr	S	0	FALSE
G4N1P6	SP	extr	S	0	FALSE
G5EHM4	SP	extr	S	0	FALSE
G4NLT9	SP	extr	S	0	FALSE
G4N3S1	SP	extr	S	0	FALSE
G4MKW3	SP	extr	S	0	FALSE
G4N005	SP	extr	S	0	FALSE
G4MMH2	SP	extr	S	0	FALSE
G4NI11	SP	extr	S	0	FALSE
G4NGA7	SP	extr	S	0	FALSE
G4NA68	SP	extr	S	0	FALSE
G4N5C1	SP	extr	S	0	FALSE
G4NG69	SP	extr	S	0	FALSE
G4MKZ3	SP	extr	S	0	FALSE
G4NIL4	SP	extr	S	0	FALSE
G4MVW7	SP	extr	S	0	FALSE
G4N6J4	SP	extr	S	0	FALSE
G4N0Y2	SP	extr	S	0	FALSE
G4N0M2	SP	extr	S	0	FALSE
G4N2N8	SP	extr	S	0	FALSE
G4MQW5	SP	extr	S	0	FALSE
G4N4K5	SP	extr	S	0	FALSE
G5EH88	SP	extr	S	0	FALSE
G4MYQ7	SP	extr	S	0	FALSE
G4N4F1	SP	extr	S	0	FALSE
G4MQZ0	SP	extr	S	0	FALSE
G4ML85	SP	extr	S	0	FALSE
G4N1Y8	SP	extr	S	0	FALSE
G5EH74	SP	extr	S	0	FALSE
G4MXQ3	SP	extr	S	0	FALSE
G4MVW5	SP	extr	S	0	FALSE
G4NC59	SP	extr	S	0	FALSE
G4NAZ1	SP	extr	S	0	FALSE
G4N9H6	SP	extr	S	0	FALSE
G4MPY2	SP	extr	S	0	FALSE
G4NBV8	SP	extr	S	0	FALSE
G4MXT6	SP	extr	S	0	FALSE
G4NCJ4	SP	extr	S	0	FALSE
G4MYA9	SP	extr	S	0	FALSE
G4NFG0	SP	extr	S	0	FALSE
Q2KEQ7	SP	extr	S	0	FALSE
G4NBY8	SP	extr	S	0	FALSE
G4MX86	SP	extr	S	0	FALSE
G4NEA1	SP	extr	S	0	FALSE
G4MXA4	SP	extr	S	0	FALSE
G4N2W4	SP	extr	S	0	FALSE
G4MUU6	SP	extr	S	0	FALSE
G4N560	SP	extr	S	0	FALSE
G4NHG9	SP	extr	S	0	FALSE
G4NAQ4	SP	extr	S	0	FALSE
G4N9L9	SP	extr	S	0	FALSE
G4N893	SP	extr	S	0	FALSE
G4N8T5	SP	extr	S	0	FALSE
A4QWP8	SP	extr	S	0	FALSE
G4MPP8	SP	extr	S	0	FALSE
G4MXA6	SP	extr	S	0	FALSE
G4N6R4	SP	extr	S	0	FALSE
G4N2S5	SP	extr	S	0	FALSE
G4MPD5	SP	extr	S	0	FALSE
G5EHV6	SP	extr	S	0	FALSE
A4RGT4	SP	extr	S	0	FALSE
G4NDB7	SP	extr	S	0	FALSE
G4N8V8	SP	extr	S	0	FALSE
G4MUP1	SP	extr	S	0	FALSE
G4MYG7	SP	extr	S	0	FALSE
G4N305	SP	extr	S	0	FALSE
G4MW44	SP	extr	S	0	FALSE
G4N9U6	SP	extr	S	0	FALSE
G4ND95	SP	extr	S	0	FALSE
G4MPP1	SP	extr	S	0	FALSE
G4N4S8	SP	extr	S	0	FALSE
G4N1N5	SP	extr	S	0	FALSE
P52751	SP	extr	S	0	FALSE
G4N6Q3	SP	extr	S	0	FALSE
G4MQ56	SP	extr	S	0	FALSE
G4NK46	SP	extr	S	0	FALSE
Q2KEM4	SP	extr	S	0	FALSE
G4MVY1	SP	extr	S	0	FALSE
G4MQT9	SP	extr	S	0	FALSE
G4NA63	SP	extr	S	0	FALSE
G4N797	SP	extr	S	0	FALSE
G4NGD2	SP	extr	S	0	FALSE
Q2KHE0	SP	extr	S	0	FALSE
G4NFQ8	SP	extr	S	0	FALSE
G4N0V2	SP	extr	S	0	FALSE
G4ND02	SP	extr	S	0	FALSE
G4NDA8	SP	extr	S	0	FALSE
G4N3N5	SP	extr	S	0	FALSE
G4N0N7	SP	extr	S	0	FALSE
G4MPU2	SP	extr	S	0	FALSE
G4N9C2	SP	extr	S	0	FALSE
G4NFF4	SP	extr	S	0	FALSE
A4QUA4	SP	extr	S	0	FALSE
G4N9Z7	SP	extr	S	0	FALSE
G4NGB6	SP	extr	S	0	FALSE
G4NAP1	SP	extr	S	0	FALSE
Q2KH28	SP	extr	S	0	FALSE
G4MY33	SP	extr	S	0	FALSE
G4NI09	SP	extr	S	0	FALSE
G5EI47	SP	extr	S	0	FALSE
G4N1D5	SP	extr	S	0	FALSE
G4MMD6	SP	extr	S	0	FALSE
G4N3X8	SP	extr	S	0	FALSE
G4NAL5	SP	extr	S	0	FALSE
G4NIH6	SP	extr	S	0	FALSE
G4MYP4	SP	extr	S	0	FALSE
G4NFX3	SP	extr	S	0	FALSE
G4MS45	SP	extr	S	0	FALSE
G4N092	SP	extr	S	0	FALSE
G4MKU3	SP	extr	S	0	FALSE
G4MWF5	SP	extr	S	0	FALSE
G4N8W4	SP	extr	S	0	FALSE
G4N2A6	SP	extr	S	0	FALSE
G4MNT3	SP	extr	S	0	FALSE
G4MUG8	SP	extr	S	0	FALSE
G4N7D9	SP	extr	S	0	FALSE
G4NHX9	SP	extr	S	0	FALSE
G4MTB4	SP	extr	S	0	FALSE
G4N065	SP	extr	S	0	FALSE
G4NHJ9	SP	extr	S	0	FALSE
G4MQR8	SP	extr	S	0	FALSE
G4N5W9	SP	extr	S	0	FALSE
G4NHY4	SP	extr	S	0	FALSE
G4NAM6	SP	extr	S	0	FALSE
G4NGI0	SP	extr	S	0	FALSE
G4MVY9	SP	extr	S	0	FALSE
G4MUX9	SP	extr	S	0	FALSE
G4N2F3	SP	extr	S	0	FALSE
G4N8P5	SP	extr	S	0	FALSE
G4NI55	SP	extr	S	0	FALSE
G4N680	SP	extr	S	0	FALSE
G4N6L5	SP	extr	S	0	FALSE
G4NA47	SP	extr	S	0	FALSE
G4N4F9	SP	extr	S	0	FALSE
G4NFP4	SP	extr	S	0	FALSE
G4N0C3	SP	extr	S	0	FALSE
G4MS59	SP	extr	S	0	FALSE
G4NE94	SP	extr	S	0	FALSE
G5EHD6	SP	extr	S	0	FALSE
G4NCZ9	SP	extr	S	0	FALSE
G4N4A2	SP	extr	S	0	FALSE
G4MU66	SP	extr	S	0	FALSE
G4N408	SP	extr	S	0	FALSE
Q2KHE3	SP	extr	S	0	FALSE
G4MVM8	SP	extr	S	0	FALSE
G4MZV7	SP	extr	S	0	FALSE
G4N926	SP	extr	S	0	FALSE
G4N9B9	SP	extr	S	0	FALSE
G4N623	SP	extr	S	0	FALSE
G4N2X8	SP	extr	S	0	FALSE
G4N8C6	SP	extr	S	0	FALSE
G4N7J2	SP	extr	S	0	FALSE
G4NAG2	SP	extr	S	0	FALSE
G4NII2	SP	extr	S	0	FALSE
G4NET6	SP	extr	S	0	FALSE
G4NHX0	SP	extr	S	0	FALSE
G4N0X5	SP	extr	S	0	FALSE
G4NBI4	SP	extr	S	0	FALSE
G4NGA2	SP	extr	S	0	FALSE
Q2KES4	SP	extr	S	0	FALSE
G4N2F1	SP	extr	S	0	FALSE
G4MN27	SP	extr	S	0	FALSE
G4MKE7	SP	extr	S	0	FALSE
Q2KF25	SP	extr	S	0	FALSE
G4NAH8	SP	extr	S	0	FALSE
G4N3W5	SP	extr	S	0	FALSE
G4MSM1	SP	extr	S	0	FALSE
G4NJS7	SP	extr	S	0	FALSE
G4NL96	SP	extr	S	0	FALSE
G4MYJ3	SP	extr	S	0	FALSE
G4N9L8	SP	extr	S	0	FALSE
G4NDX3	SP	extr	S	0	FALSE
G4MMM4	SP	extr	S	0	FALSE
G4NBC5	SP	extr	S	0	FALSE
G4MWY0	SP	extr	S	0	FALSE
G4N1T6	SP	extr	S	0	FALSE
G5EH55	SP	extr	S	0	FALSE
G4MXC7	SP	extr	S	0	FALSE
G4MWC0	SP	extr	S	0	FALSE
G4NJJ0	SP	extr	S	0	FALSE
G4N8U1	SP	extr	S	0	FALSE
G4MW49	SP	extr	S	0	FALSE
G4N060	SP	extr	S	0	FALSE
G4NBA0	SP	extr	S	0	FALSE
G4N440	SP	extr	S	0	FALSE
G4NIS9	SP	extr	S	0	FALSE
G4NGY2	SP	extr	S	0	FALSE
G4NI68	SP	extr	S	0	FALSE
G4N0R4	SP	extr	S	0	FALSE
G4NHI9	SP	extr	S	0	FALSE
G4NBR2	SP	extr	S	0	FALSE
G4N1G3	SP	extr	S	0	FALSE
G4NBA6	SP	extr	S	0	FALSE
G4NI03	SP	extr	S	0	FALSE
G4MQL5	SP	extr	S	0	FALSE
G4MY31	SP	extr	S	0	FALSE
G5EH68	SP	extr	S	0	FALSE
G4MXA7	SP	extr	S	0	FALSE
G4MMM7	SP	extr	S	0	FALSE
G4N3Q5	SP	extr	S	0	FALSE
G4N2I1	SP	extr	S	0	FALSE
Q2KEC4	SP	extr	S	0	FALSE
G4N2Y0	SP	extr	S	0	FALSE
G4NFK0	SP	extr	S	0	FALSE
G4MP47	SP	extr	S	0	FALSE
G4NHV8	SP	extr	S	0	FALSE
L7J8G9	SP	extr	S	0	FALSE
L7IQ60	SP	extr	S	0	FALSE
G4NJ36	SP	extr	S	0	FALSE

## Sheet: Nonclassical secreted proteins
Table S2. A summary list of classical secreted proteins and non-classical secreted proteins in M. oryzae.
Uniprot Accession Number	Signalp_6.0	Secretome P (Score)
G4NDL6	none	0.951
G5EHR9	none	0.899
G4MQR2	none	0.877
G4MRJ2	none	0.868
G4NCQ6	none	0.859
G4MUK8	none	0.846
G4NCW2	none	0.845
G4MTR3	none	0.845
G4NCJ7	none	0.844
G5EH27	none	0.842
G4MZK6	none	0.839
G5EHZ3	none	0.83
G4N2G1	none	0.83
G4MQH0	none	0.828
G4MKR3	none	0.819
G4MU02	none	0.807
G4N8M5	none	0.806
G4MKD2	none	0.8
G4N8F6	none	0.798
G4N700	none	0.794
G4N6U9	none	0.784
G4MZF7	none	0.776
G4MQ20	none	0.775
G4MPK6	none	0.773
G4ML54	none	0.773
G4N5C0	none	0.765
G4NJB0	none	0.764
G4N933	none	0.76
G4ND45	none	0.757
G4N188	none	0.757
G5EHV3	none	0.752
G4N001	none	0.745
G4NIB4	none	0.738
G4N014	none	0.735
G4MZ86	none	0.728
Q9UWF0	none	0.727
G4NCM6	none	0.725
G4N783	none	0.725
G4MUS5	none	0.721
G4MUJ0	none	0.72
G4MMY9	none	0.72
G4MTS9	none	0.714
G4N1N3	none	0.711
G4N8Y8	none	0.709
Q2KGM0	none	0.698
G4MTC2	none	0.698
G4N3R3	none	0.696
G4NI96	none	0.695
G5EH03	none	0.694
G4N701	none	0.692
G4N5R3	none	0.689
G4NB44	none	0.687
G4MKP3	none	0.685
G4MKH8	none	0.682
G4N4X6	none	0.681
G4NE42	none	0.677
G4ND25	none	0.676
G4MLS0	none	0.674
G4N769	none	0.673
G4N2G0	none	0.673
G4MY14	none	0.669
G5EH09	none	0.668
G4N5Q4	none	0.663
G4MXC0	none	0.663
G4NI28	none	0.662
G4MLG1	none	0.662
G4MS63	none	0.661
G4MSC0	none	0.66
D4NXE7	none	0.66
G4MZC8	none	0.656
G4NCF7	none	0.65
G4MZI9	none	0.645
G4N6X3	none	0.639
G4NCX3	none	0.637
G4MSJ2	none	0.633
G4N981	none	0.632
G4N6K7	none	0.628
G4N7Q6	none	0.626
G4N6T2	none	0.625
G4NFB7	none	0.623
G4N9J2	none	0.623
G4N069	none	0.623
G4N4W7	none	0.62
G4MWF3	none	0.618
G4NJT2	none	0.616
G4NJI5	none	0.611
G4NIS3	none	0.611
G4ND68	none	0.608
G4MUJ2	none	0.607
G4N5C8	none	0.604
G4MV32	none	0.603
G4N7C6	none	0.601
G4MUA7	none	0.93
G4MYQ8	none	0.923
Q51VY4	none	0.917
G4N4W0	none	0.905
G4MTH3	none	0.896
G4N340	none	0.894
G4N9I9	none	0.893
G4NLA2	none	0.883
G4NCX8	none	0.883
G4MRV9	none	0.876
G4N8F1	none	0.872
G4NFM4	none	0.871
G4NLC7	none	0.868
G4NHC3	none	0.867
G4MTS8	none	0.865
G4N031	none	0.862
G4NIS1	none	0.856
G5EGX5	none	0.846
G4MTL4	none	0.842
G5EGZ5	none	0.838
G4MTF1	none	0.834
G4MUT9	none	0.83
G4NB37	none	0.829
G4NAT1	none	0.825
G4N5J5	none	0.823
G4MNG8	none	0.823
G4MYC7	none	0.818
G4MXJ6	none	0.816
Q2KGF7	none	0.815
G4MY89	none	0.804
G4NIS0	none	0.803
G4NC58	none	0.8
G4NH48	none	0.799
G5EHG6	none	0.793
G4MPV8	none	0.793
G4MTN1	none	0.792
G4N818	none	0.789
G4NDA1	none	0.782
G4N7Y6	none	0.778
G4N0X3	none	0.778
G4MUU2	none	0.775
G4ND83	none	0.772
G4N2S0	none	0.767
G4N1D2	none	0.763
G4MM51	none	0.761
G4MRI3	none	0.756
G4N7N7	none	0.755
G4MYJ6	none	0.753
G4N4C7	none	0.75
G4MMW9	none	0.741
G4MR39	none	0.738
G4N6P3	none	0.735
G4MV01	none	0.735
G4NKP8	none	0.732
G4MPE2	none	0.732
A4RGA1	none	0.732
Q2KH30	none	0.728
G5EI58	none	0.722
G4NAA0	none	0.716
G4MWY3	none	0.708
G4MYI6	none	0.704
G4N6C5	none	0.702
G4MVI1	none	0.701
G4MZT1	none	0.698
G5EH26	none	0.696
G4N068	none	0.694
G4MP67	none	0.694
G4NAS8	none	0.693
G4NKB0	none	0.69
G4N7C2	none	0.683
G4MZ65	none	0.681
G4N349	none	0.68
G4NIQ1	none	0.674
G4NFS4	none	0.671
G4N2C2	none	0.667
G4MQZ3	none	0.667
G4MQW1	none	0.666
G4NHR8	none	0.665
G4N6Y9	none	0.664
G4MVC4	none	0.662
G4N2S9	none	0.657
G4NDZ5	none	0.656
G4NAV1	none	0.655
G4MXL4	none	0.655
A4QR21	none	0.655
G4NEY0	none	0.654
G4NC37	none	0.653
G5EH30	none	0.652
G4MTV8	none	0.652
G4MV91	none	0.651
G4MM52	none	0.648
G5EI19	none	0.644
G4NF25	none	0.644
G4MQN1	none	0.643
G4N2G2	none	0.642
G4NAD2	none	0.638
G4MN52	none	0.636
G4N6D8	none	0.633
G4NE45	none	0.631
G4N6R7	none	0.631
G4N0E3	none	0.63
G4N5E5	none	0.624
G4N6A6	none	0.622
G4N470	none	0.618
G4MW57	none	0.618
G4N7S0	none	0.617
G4MSC5	none	0.616
G4N6W6	none	0.611
G4MZM5	none	0.611
G4NKL3	none	0.61
G4MZQ9	none	0.61
G4NBZ7	none	0.609
G4N9J5	none	0.609
G4NJZ1	none	0.606
G4MSK8	none	0.606
G4NC88	none	0.604
G4N751	none	0.603
G4MUN3	none	0.603
G4N9G1	none	0.601
G4MY42	none	0.601
A4RDI6	none	0.601
G4MZD1	none	0.959
G4N4E1	none	0.936
G5EHF6	none	0.931
G4MPJ3	none	0.927
G4MP06	none	0.919
G4MLF9	none	0.899
A4QVH4	none	0.893
G4MV18	none	0.892
A4QQ05	none	0.892
G4N3Q1	none	0.889
G5EHP5	none	0.881
G4N023	none	0.871
G4N585	none	0.87
G4N4X7	none	0.87
G5EGW2	none	0.868
G4MUW4	none	0.866
G4MY82	none	0.865
G4MLN4	none	0.86
G4MQA1	none	0.856
G4MUH6	none	0.855
G4MSW5	none	0.855
Q9UVR2	none	0.852
G4NEH5	none	0.85
G4MVP8	none	0.85
G4N4D5	none	0.842
G4MT24	none	0.842
G4MPK2	none	0.839
G4NJL5	none	0.838
G4NDM9	none	0.836
A4QTY2	none	0.836
G4N6G4	none	0.83
G4N0M6	none	0.83
G4N1P2	none	0.827
G5EHB6	none	0.824
G4N4P6	none	0.824
G4NAY2	none	0.822
G5EHL1	none	0.818
G4N152	none	0.817
G5EHT4	none	0.812
G4MSD2	none	0.812
G5EHZ7	none	0.809
G4NEG4	none	0.805
G4N4A8	none	0.804
G4N253	none	0.804
P0CT15	none	0.802
G4N5N3	none	0.801
G4MR23	none	0.8
G4ND53	none	0.799
G4MPS9	none	0.797
G4N1C8	none	0.796
G4NC38	none	0.787
G4NC33	none	0.785
G4NE41	none	0.782
G4NBH2	none	0.779
G4N2E1	none	0.777
G4MMH7	none	0.774
G4MY81	none	0.769
G4MYG4	none	0.768
A0A151V4S7	none	0.766
G4N5R0	none	0.765
G4N8W1	none	0.755
G4N816	none	0.754
G4N6Y3	none	0.743
G4N2H4	none	0.742
G4MSJ5	none	0.742
G4MTT2	none	0.738
G4N641	none	0.737
G4MTG6	none	0.737
G4MRX9	none	0.732
Q9UWF0	none	0.727
G4N4T3	none	0.721
G4MYU4	none	0.717
G5EGZ6	none	0.715
G5EHZ2	none	0.713
G4MNI7	none	0.712
G4NGZ3	none	0.711
G4MSV9	none	0.709
G4ML70	none	0.708
G4MMA8	none	0.704
G4MZ47	none	0.702
G4MU49	none	0.701
G4MYZ1	none	0.699
G4NGM8	none	0.695
G4MNH6	none	0.695
G4MNP2	none	0.69
G4N4V4	none	0.687
A4QU31	none	0.685
G4N713	none	0.683
G4NHN3	none	0.68
G4NB58	none	0.68
G4MXB3	none	0.68
O42621	none	0.68
G4N0E1	none	0.677
G4N037	none	0.676
G4N2E2	none	0.675
G4MN14	none	0.673
G4MRL8	none	0.667
G4MVE1	none	0.666
G4MP15	none	0.665
G4N7N1	none	0.663
G4MUT5	none	0.663
G4NB93	none	0.659
G4NCA0	none	0.655
G4MWX0	none	0.65
G4N4Y5	none	0.648
G4N1W1	none	0.647
G4MYI9	none	0.643
G4MVS3	none	0.642
G4MSY8	none	0.642
G4MQ44	none	0.642
Q2KFD3	none	0.639
G4NBS0	none	0.638
G4MKQ8	none	0.638
A4QYU7	none	0.636
G4N4W5	none	0.635
G4N127	none	0.633
G4N1A1	none	0.631
G4MQ26	none	0.631
G4MUY9	none	0.63
G4MMG8	none	0.63
A4RHN3	none	0.63
G4N4I2	none	0.629
G4MSU9	none	0.628
G4MWG0	none	0.626
G4NFA9	none	0.621
G4MNS6	none	0.62
A4QYQ5	none	0.619
G4N1I9	none	0.618
G4NDN0	none	0.617
G4N7A2	none	0.617
G4MY95	none	0.617
G4MUY2	none	0.614
G4MK83	none	0.614
G4NDC9	none	0.611
G4MPX1	none	0.608
G4NGP8	none	0.606
G4MSH9	none	0.606
G4N4I9	none	0.605
G4MV90	none	0.605
P0CT07	none	0.601
Q2KGG8	none	0.977
G4NDH4	none	0.962
G4MKU0	none	0.955
G4N0D6	none	0.933
G4N801	none	0.922
G4N5Q9	none	0.911
G4MPE9	none	0.909
G4N058	none	0.896
G4MWU4	none	0.884
G4NBT2	none	0.882
G4N796	none	0.849
G4N269	none	0.847
G4MS49	none	0.846
G4N2P2	none	0.828
G4N2V2	none	0.826
G4MKR5	none	0.826
G4MV31	none	0.804
G4NE52	none	0.8
G4N937	none	0.799
G4NEB5	none	0.797
G5EHY4	none	0.794
G4N855	none	0.792
G4N371	none	0.791
G4MML2	none	0.783
G4N5K3	none	0.781
G4MLU3	none	0.779
G4MRX0	none	0.777
G4N829	none	0.774
G4N3P2	none	0.766
G4N2B5	none	0.758
G4NIR6	none	0.749
G4MNY1	none	0.747
G4N486	none	0.737
G4MK90	none	0.727
G4NDE1	none	0.725
G4MN98	none	0.721
G4N583	none	0.716
G4MV24	none	0.713
G4N7W0	none	0.708
G4MLM6	none	0.704
G4N0Z0	none	0.698
G4NGV6	none	0.691
G4ML68	none	0.691
G4MUF9	none	0.69
G4MLV7	none	0.69
G4N731	none	0.689
G4MKY5	none	0.687
G4NAB2	none	0.683
A4RCX7	none	0.681
G4N0X4	none	0.68
G4MRM5	none	0.678
G4NJE8	none	0.67
G4NHF2	none	0.669
G4NCD6	none	0.665
G4N9Z4	none	0.663
G4NE25	none	0.661
G4N0N5	none	0.659
G4MYK6	none	0.658
G4MXS3	none	0.658
G4MMC5	none	0.656
G4NC90	none	0.646
G4NCW1	none	0.644
G5EI06	none	0.638
G4MYC2	none	0.638
G4MS58	none	0.627
G4MRY9	none	0.62
Q2KF61	none	0.615
A0A151V4	none	0.614
G4NHW2	none	0.612
G4MLS2	none	0.611
G4N500	none	0.609
G4MLM0	none	0.609
Q2KH41	none	0.608
G5EGX3	none	0.607
G4NH36	none	0.906
G4N4Y7	none	0.904
G4N0C2	none	0.901
G5EHD2	none	0.899
G4NB22	none	0.894
G4NC20	none	0.886
G4N819	none	0.886
G4NK78	none	0.878
G4N6T5	none	0.867
P0CT09	none	0.865
G4N1S3	none	0.858
G4MYU6	none	0.848
G4MUW8	none	0.842
G4N331	none	0.841
G4NCA2	none	0.817
G4MZ54	none	0.81
G4MUS6	none	0.805
G4NBG4	none	0.797
G4MRY0	none	0.795
G4MUF5	none	0.792
G4MYD1	none	0.776
G4MTM1	none	0.775
G4NDU7	none	0.762
G4NA20	none	0.748
G4MWS4	none	0.742
G4NIQ4	none	0.74
G4MPW3	none	0.737
G4N531	none	0.734
G4NK63	none	0.724
G4MQ14	none	0.722
G4N901	none	0.714
G5EHC3	none	0.711
G4N640	none	0.7
G4N8F8	none	0.695
G4NDJ0	none	0.689
G4MZP5	none	0.689
G4NHB9	none	0.685
G4MND1	none	0.661
G4N6P4	none	0.648
G4NEE8	none	0.646
G4ML52	none	0.645
G4NHH4	none	0.64
G4MKM4	none	0.64
G4NBC7	none	0.616
G4N9J6	none	0.614
G4NGD5	none	0.612
G4N4S2	none	0.607
G4MTE0	none	0.607
G4MMK8	none	0.602
G4MT72	none	0.601
G4MMP7	none	0.963
G4NB04	none	0.95
G4MYD0	none	0.948
G4NEX7	none	0.942
G4NBR4	none	0.933
G4NE50	none	0.926
G4N2Q2	none	0.925
G4MTW7	none	0.925
G4NGW0	none	0.91
G5EHD0	none	0.904
G5EH19	none	0.896
G4N6M7	none	0.896
G4N1F6	none	0.88
G4MW96	none	0.876
G4MP17	none	0.869
G4N0Y7	none	0.868
G4MTX2	none	0.865
G4NII9	none	0.863
G4MRS1	none	0.858
G4NDZ8	none	0.853
G4N6G3	none	0.845
G4NA24	none	0.828
G4NJW3	none	0.823
G4MUT3	none	0.819
G5EHU1	none	0.803
G4MVP9	none	0.8
G4N5G9	none	0.793
G4NBI5	none	0.791
G4NJV6	none	0.79
G4NCS9	none	0.785
G4MPR1	none	0.784
A4RIF1	none	0.775
G4NAL7	none	0.77
G4NGX6	none	0.766
G4N682	none	0.766
G4NL40	none	0.765
G4NC97	none	0.763
G4NDB6	none	0.761
G4MSA5	none	0.758
G4MLR9	none	0.754
G4NIR5	none	0.753
G4NGA6	none	0.753
G4MUW5	none	0.751
G4NB34	none	0.746
Q52BY4	none	0.745
G4MUJ6	none	0.737
G4MLQ7	none	0.736
G4ND04	none	0.735
G4MVU5	none	0.734
G4NGB3	none	0.73
Q2KGN6	none	0.727
G4N6B5	none	0.722
G5EGX9	none	0.716
G4N3Z0	none	0.706
G4MQ78	none	0.704
G4N6G5	none	0.703
G4MRP4	none	0.698
G4MMB7	none	0.695
G4MWF7	none	0.693
G4MN29	none	0.693
G4N7B1	none	0.685
G4MXJ4	none	0.678
G4ML91	none	0.677
G4NGH6	none	0.673
G4MV04	none	0.669
G4N4R6	none	0.665
Q52DM9	none	0.659
G4NH90	none	0.658
G4N6Q5	none	0.656
G4N4E7	none	0.656
G4N8L1	none	0.655
G4MZC1	none	0.655
G4N958	none	0.654
G4N3X6	none	0.652
G4MQC6	none	0.652
G4MRG3	none	0.646
G4N3J3	none	0.642
G4N5J2	none	0.64
G4MM79	none	0.638
G4N6S7	none	0.637
G4N4C0	none	0.633
G4N9Q3	none	0.632
G4NGU6	none	0.63
G4N142	none	0.629
G4MV36	none	0.625
G4N830	none	0.622
G4N9F4	none	0.621
G4N6U0	none	0.62
G4NDR9	none	0.618
G4MUZ9	none	0.618
G4NH78	none	0.617
G4N767	none	0.61
G4MUP3	none	0.61
G4MPI2	none	0.609
G4NHA3	none	0.607
G4NJ24	none	0.605
G5EI09	none	0.603
G4N104	none	0.602
G4MN31	none	0.932
G4N5Q2	none	0.928
G4N5P5	none	0.916
G4MLJ1	none	0.905
G4NIM4	none	0.889
G4MU37	none	0.887
G4N454	none	0.878
G4NGN0	none	0.871
G4MQX6	none	0.868
G4N1V0	none	0.856
G4MPT7	none	0.847
Q8TG90	none	0.846
G4N862	none	0.845
G4NHB6	none	0.833
G4N2E4	none	0.831
G4NBY6	none	0.821
G4NFE6	none	0.82
G4MU78	none	0.816
G4N6R1	none	0.808
G4NCN9	none	0.806
G4ML96	none	0.805
A4RHR8	none	0.805
G4N7S3	none	0.802
G4MQR3	none	0.792
G4MNE9	none	0.791
A4RC73	none	0.79
Q524W4	none	0.786
G4N1F3	none	0.783
G4N9T0	none	0.779
G4N509	none	0.771
G4NGG1	none	0.768
G4MXI1	none	0.763
G4N631	none	0.743
G4ND70	none	0.74
G4NH50	none	0.739
G4MRC8	none	0.731
G4NE21	none	0.72
G4NAT7	none	0.72
G4NKL7	none	0.719
G4NHV2	none	0.71
G4NLM7	none	0.703
G4NCR1	none	0.703
G4N4T7	none	0.693
G4MRZ2	none	0.682
A4QVI3	none	0.679
G4N7G0	none	0.676
G4MYM9	none	0.673
G4N450	none	0.662
G4NFL6	none	0.659
G4N3J4	none	0.645
G4MLR7	none	0.645
G4MSQ7	none	0.644
G4N7L4	none	0.64
G4NIC4	none	0.638
G4N6Z9	none	0.636
G4N270	none	0.633
G4MW48	none	0.629
G4NE82	none	0.628
G4MWM3	none	0.626
G4N9F7	none	0.622
G4MXS2	none	0.622
G4MMQ9	none	0.618
G4NAV9	none	0.617
G4N928	none	0.615
G4NB53	none	0.614
G4N3M2	none	0.614
G4MUD2	none	0.614
G4N0U5	none	0.608
G4N5A5	none	0.605
A4R8B5	none	0.6
G4N1F0	none	0.929
Q2KG10	none	0.91
G4MSI0	none	0.901
G4MSR1	none	0.899
G4NBL4	none	0.888
G4NGW5	none	0.887
G4MR57	none	0.887
G4MRL0	none	0.883
G4NCP1	none	0.874
G4NC73	none	0.869
G4NIR1	none	0.867
Q2KH24	none	0.862
G4NIJ8	none	0.857
G4NB80	none	0.853
G4NB08	none	0.845
G4MWJ8	none	0.841
G4NCG6	none	0.835
G4N8G6	none	0.835
G4ND65	none	0.825
G4MTJ6	none	0.822
G4MXW1	none	0.82
G4MY29	none	0.816
G4MTH9	none	0.807
G4MWQ4	none	0.806
G4NG54	none	0.799
Q2KF27	none	0.796
G4NIR9	none	0.784
G4MRP5	none	0.781
G4N232	none	0.775
G4NBG2	none	0.76
G4N0X9	none	0.76
G4NBF8	none	0.759
G4NEL5	none	0.753
G4MPF3	none	0.746
G4NA56	none	0.745
G4NGZ2	none	0.74
G4MVJ1	none	0.74
G5EGX1	none	0.736
G4ND37	none	0.729
G4MST0	none	0.729
G4ND54	none	0.723
G4MR67	none	0.719
G4MU60	none	0.718
G4NB01	none	0.712
G4MW63	none	0.712
G4NIV3	none	0.711
G4N4T6	none	0.711
G4N907	none	0.71
G4MY73	none	0.71
G4N9P1	none	0.708
G4NEE1	none	0.705
G4MUQ1	none	0.703
G4NHP0	none	0.691
G4N4V8	none	0.689
G4MQ94	none	0.689
G4NLM5	none	0.687
G4N5Z9	none	0.685
G5EHK1	none	0.678
G5EHF9	none	0.674
Q2KEY4	none	0.673
G4NB94	none	0.672
G4N3Z5	none	0.672
G4MPC7	none	0.671
G4MM86	none	0.671
G4NC35	none	0.664
G4NE57	none	0.657
G4NE70	none	0.656
G4NE26	none	0.656
P0C147	none	0.654
G4MSX2	none	0.648
G4NHZ2	none	0.647
G4MWK9	none	0.643
G4MM42	none	0.642
G4NFM2	none	0.637
G4N6V3	none	0.631
G4MKC6	none	0.631
G4N5H5	none	0.625
G4MU55	none	0.622
G4N4N5	none	0.616
G4MWC4	none	0.613
G4N0B4	none	0.61
G4MTB5	none	0.61
G4NEK5	none	0.606
G4N3H8	none	0.605
G4MZG8	none	0.605
G4NG10	none	0.604
G4MRA3	none	0.602
G4NED7	none	0.983
G4MQH3	none	0.939
G4N7W1	none	0.908
G4MYP2	none	0.908
Q2KEU9_Q	none	0.905
G4MSE3	none	0.893
A4RQ29	none	0.888
L7JR56_L	none	0.865
L7JGF8_L	none	0.862
G4NC43	none	0.856
G4NFD9	none	0.855
G4N1B7	none	0.854
G4NF24	none	0.851
G4MUA5	none	0.85
G4NA38	none	0.848
G4MRS5	none	0.846
Q2KGM1	none	0.838
G4MQU4	none	0.835
G4N4D1	none	0.825
L7J6S1	none	0.816
L7JAX9	none	0.807
Q2KEJ9	none	0.792
G4NCW8	none	0.779
G4N8V6	none	0.775
G4N7K4	none	0.772
G4MKV1	none	0.772
G4MSA4	none	0.766
G4MX73	none	0.763
G4N003	none	0.759
L7IUP9	none	0.75
G4N0E7	none	0.749
G4N663	none	0.748
G4MPK0	none	0.746
G4N2M3	none	0.744
A4R8V2	none	0.743
G4MXX3	none	0.739
G4MQS9	none	0.732
G4NEG8	none	0.729
G4NJ90	none	0.728
G4NH47	none	0.728
G4NEN6	none	0.717
G5EHK5	none	0.715
G4N692	none	0.712
G4MZ57	none	0.711
G4N5Y3	none	0.708
G4NFD6	none	0.699
G4NDD7	none	0.699
G4N1Y1	none	0.698
G4MRK9	none	0.697
G4N1M0	none	0.692
G4MRJ7	none	0.688
G4MMU8	none	0.688
G4MWV8	none	0.684
G4NH84	none	0.676
G4MN90	none	0.675
G4MRK7	none	0.67
G4NGW1	none	0.666
G4N6W4	none	0.666
G4MW52	none	0.656
G4N1M6	none	0.655
G4N666	none	0.654
G4N4K7	none	0.65
L7IYS3	none	0.648
G4NAX7	none	0.647
G4NB97	none	0.646
G4N0Y9	none	0.643
G4MVQ7	none	0.643
G4MRN2	none	0.643
G4NF73	none	0.642
G4MT13	none	0.64
G4NGV5	none	0.638
G4MXW2	none	0.636
G4N3L9	none	0.635
G4N026	none	0.629
G4N166	none	0.625
A4RK52	none	0.617
G4MSA9	none	0.615
G4MLG4	none	0.614
G5EGY5	none	0.611
G4MZ45	none	0.61
G4MRR6	none	0.61
G4MNQ5	none	0.61
G4NIS6	none	0.606
G4N6K2	none	0.604
G4N0T7	none	0.601
L7IR37	none	0.874
