# Supplementary material for: Screening of Candidate Effectors from Magnaporthe oryzae by In Vitro Secretomic Analysis
Source: Int J Mol Sci. 2023 Feb 6;24(4):3189. doi: 10.3390/ijms24043189 (PMC9962664; doi:10.3390/ijms24043189)
Supplement: Supplementary file 1 [file ijms-24-03189-s001.zip › R1_Li et al_Supplementary Table S3.xlsx]

## Sheet: sheet 1
Table S3. A summary list of candidate effectors of M. oryzae.
List of secreted proteins	Type of effectors	Predication criteria
tr|G4NJI0|G4NJI0_MAGO7 UVI-1 OS=Magnaporthe oryzae (strain 70-15 / ATCC MYA-4617 / FGSC 8958) OX=242507 GN=MGG_02647 PE=4 SV=1	Cytoplasmic effector	EffectorP 3.0
tr|Q2KEU7|Q2KEU7_MAGO7 Uncharacterized protein OS=Magnaporthe oryzae (strain 70-15 / ATCC MYA-4617 / FGSC 8958) OX=242507 GN=MGCH7_ch7g939 PE=4 SV=1	Apoplastic effector	EffectorP 3.0
tr|G4MKI0|G4MKI0_MAGO7 SnodProt1 OS=Magnaporthe oryzae (strain 70-15 / ATCC MYA-4617 / FGSC 8958) OX=242507 GN=MGG_05344 PE=4 SV=1	Apoplastic effector	EffectorP 3.0
tr|G4MKE6|G4MKE6_MAGO7 Uncharacterized protein OS=Magnaporthe oryzae (strain 70-15 / ATCC MYA-4617 / FGSC 8958) OX=242507 GN=MGG_10531 PE=4 SV=1	Apoplastic/cytoplasmic effector	EffectorP 3.0
tr|G4NAI7|G4NAI7_MAGO7 Uncharacterized protein OS=Magnaporthe oryzae (strain 70-15 / ATCC MYA-4617 / FGSC 8958) OX=242507 GN=MGG_13654 PE=4 SV=1	Apoplastic effector	EffectorP 3.0
tr|G4MPA9|G4MPA9_MAGO7 Uncharacterized protein OS=Magnaporthe oryzae (strain 70-15 / ATCC MYA-4617 / FGSC 8958) OX=242507 GN=MGG_07016 PE=4 SV=1	Apoplastic effector	EffectorP 3.0
tr|G4MU46|G4MU46_MAGO7 Peptidylprolyl isomerase OS=Magnaporthe oryzae (strain 70-15 / ATCC MYA-4617 / FGSC 8958) OX=242507 GN=MGG_07234 PE=4 SV=1	Cytoplasmic effector	EffectorP 3.0
tr|G4NL54|G4NL54_MAGO7 Uncharacterized protein OS=Magnaporthe oryzae (strain 70-15 / ATCC MYA-4617 / FGSC 8958) OX=242507 GN=MGG_09641 PE=4 SV=1	Apoplastic effector	EffectorP 3.0
tr|G4MY25|G4MY25_MAGO7 Uncharacterized protein OS=Magnaporthe oryzae (strain 70-15 / ATCC MYA-4617 / FGSC 8958) OX=242507 GN=MGG_10456 PE=4 SV=1	Apoplastic/cytoplasmic effector	EffectorP 3.0
tr|G4NEQ0|G4NEQ0_MAGO7 Uncharacterized protein OS=Magnaporthe oryzae (strain 70-15 / ATCC MYA-4617 / FGSC 8958) OX=242507 GN=MGG_00081 PE=4 SV=1	Apoplastic effector	EffectorP 3.0
tr|Q2KEQ8|Q2KEQ8_MAGO7 CBM20 domain-containing protein OS=Magnaporthe oryzae (strain 70-15 / ATCC MYA-4617 / FGSC 8958) OX=242507 GN=MGCH7_ch7g978 PE=4 SV=1	Apoplastic effector	EffectorP 3.0
tr|G4NIH0|G4NIH0_MAGO7 Uncharacterized protein OS=Magnaporthe oryzae (strain 70-15 / ATCC MYA-4617 / FGSC 8958) OX=242507 GN=MGG_09842 PE=4 SV=1	Apoplastic effector	EffectorP 3.0
tr|G5EI76|G5EI76_MAGO7 AltA1 domain-containing protein OS=Magnaporthe oryzae (strain 70-15 / ATCC MYA-4617 / FGSC 8958) OX=242507 GN=MGCH7_ch7g410 PE=4 SV=1	Apoplastic effector	EffectorP 3.0
tr|G4NLT9|G4NLT9_MAGO7 Uncharacterized protein OS=Magnaporthe oryzae (strain 70-15 / ATCC MYA-4617 / FGSC 8958) OX=242507 GN=MGG_02851 PE=4 SV=1	Apoplastic/cytoplasmic effector	EffectorP 3.0
tr|G4N5C1|G4N5C1_MAGO7 Carb_bind domain-containing protein OS=Magnaporthe oryzae (strain 70-15 / ATCC MYA-4617 / FGSC 8958) OX=242507 GN=MGG_05232 PE=4 SV=1	Apoplastic effector	EffectorP 3.0
tr|G4NG69|G4NG69_MAGO7 Uncharacterized protein OS=Magnaporthe oryzae (strain 70-15 / ATCC MYA-4617 / FGSC 8958) OX=242507 GN=MGG_14966 PE=4 SV=1	Apoplastic effector	EffectorP 3.0
tr|G4N0M2|G4N0M2_MAGO7 Uncharacterized protein OS=Magnaporthe oryzae (strain 70-15 / ATCC MYA-4617 / FGSC 8958) OX=242507 GN=MGG_07748 PE=4 SV=1	Cytoplasmic effector	EffectorP 3.0
tr|G4N4K5|G4N4K5_MAGO7 Uncharacterized protein OS=Magnaporthe oryzae (strain 70-15 / ATCC MYA-4617 / FGSC 8958) OX=242507 GN=MGG_05982 PE=4 SV=1	Cytoplasmic/apoplastic effector	EffectorP 3.0
tr|G5EH88|G5EH88_MAGO7 SnoaL-like domain-containing protein OS=Magnaporthe oryzae (strain 70-15 / ATCC MYA-4617 / FGSC 8958) OX=242507 GN=MGCH7_ch7g1093 PE=4 SV=1	Apoplastic effector	EffectorP 3.0
tr|G4N4F1|G4N4F1_MAGO7 Uncharacterized protein OS=Magnaporthe oryzae (strain 70-15 / ATCC MYA-4617 / FGSC 8958) OX=242507 GN=MGG_16869 PE=4 SV=1	Apoplastic effector	EffectorP 3.0
tr|G4NC59|G4NC59_MAGO7 Cell wall glucanase OS=Magnaporthe oryzae (strain 70-15 / ATCC MYA-4617 / FGSC 8958) OX=242507 GN=MGG_01134 PE=4 SV=1	Apoplastic effector	EffectorP 3.0
sp|G4NAZ1|CE12A_MAGO7 Endoglucanase cel12A OS=Magnaporthe oryzae (strain 70-15 / ATCC MYA-4617 / FGSC 8958) OX=242507 GN=cel12A PE=1 SV=1	Apoplastic effector	EffectorP 3.0
tr|G4MPY2|G4MPY2_MAGO7 Sod_Cu domain-containing protein OS=Magnaporthe oryzae (strain 70-15 / ATCC MYA-4617 / FGSC 8958) OX=242507 GN=MGG_13177 PE=4 SV=1	Apoplastic effector	EffectorP 3.0
tr|G4NCJ4|G4NCJ4_MAGO7 Uncharacterized protein OS=Magnaporthe oryzae (strain 70-15 / ATCC MYA-4617 / FGSC 8958) OX=242507 GN=MGG_01064 PE=4 SV=1	Cytoplasmic effector	EffectorP 3.0
tr|G4MX86|G4MX86_MAGO7 Uncharacterized protein OS=Magnaporthe oryzae (strain 70-15 / ATCC MYA-4617 / FGSC 8958) OX=242507 GN=MGG_08291 PE=4 SV=1	Cytoplasmic effector	EffectorP 3.0
tr|G4NEA1|G4NEA1_MAGO7 Uncharacterized protein OS=Magnaporthe oryzae (strain 70-15 / ATCC MYA-4617 / FGSC 8958) OX=242507 GN=MGG_00815 PE=4 SV=1	Apoplastic effector	EffectorP 3.0
tr|G4N2W4|G4N2W4_MAGO7 Surface protein 1 OS=Magnaporthe oryzae (strain 70-15 / ATCC MYA-4617 / FGSC 8958) OX=242507 GN=MGG_07973 PE=4 SV=1	Apoplastic effector	EffectorP 3.0
tr|G4N560|G4N560_MAGO7 Endoglucanase OS=Magnaporthe oryzae (strain 70-15 / ATCC MYA-4617 / FGSC 8958) OX=242507 GN=MGG_06069 PE=4 SV=1	Apoplastic effector	EffectorP 3.0
tr|G4N893|G4N893_MAGO7 CHRD domain-containing protein OS=Magnaporthe oryzae (strain 70-15 / ATCC MYA-4617 / FGSC 8958) OX=242507 GN=MGG_03466 PE=4 SV=1	Apoplastic effector	EffectorP 3.0
tr|G4MPP8|G4MPP8_MAGO7 Uncharacterized protein OS=Magnaporthe oryzae (strain 70-15 / ATCC MYA-4617 / FGSC 8958) OX=242507 GN=MGG_02239 PE=4 SV=1	Apoplastic effector	EffectorP 3.0
tr|G4MXA6|G4MXA6_MAGO7 Uncharacterized protein OS=Magnaporthe oryzae (strain 70-15 / ATCC MYA-4617 / FGSC 8958) OX=242507 GN=MGG_08275 PE=4 SV=1	Apoplastic effector	EffectorP 3.0
tr|G4MUP1|G4MUP1_MAGO7 Uncharacterized protein OS=Magnaporthe oryzae (strain 70-15 / ATCC MYA-4617 / FGSC 8958) OX=242507 GN=MGG_11335 PE=4 SV=1	Apoplastic effector	EffectorP 3.0
tr|G4MPP1|G4MPP1_MAGO7 Uncharacterized protein OS=Magnaporthe oryzae (strain 70-15 / ATCC MYA-4617 / FGSC 8958) OX=242507 GN=MGG_02234 PE=4 SV=1	Cytoplasmic effector	EffectorP 3.0
sp|P52751|MPG1_MAGO7 Hydrophobin-like protein MPG1 OS=Magnaporthe oryzae (strain 70-15 / ATCC MYA-4617 / FGSC 8958) OX=242507 GN=MPG1 PE=1 SV=1	Cytoplasmic/apoplastic effector	EffectorP 3.0
tr|G4NGD2|G4NGD2_MAGO7 Pectate lyase OS=Magnaporthe oryzae (strain 70-15 / ATCC MYA-4617 / FGSC 8958) OX=242507 GN=MGG_04348 PE=3 SV=1	Apoplastic effector	EffectorP 3.0
tr|Q2KHE0|Q2KHE0_MAGO7 Uncharacterized protein OS=Magnaporthe oryzae (strain 70-15 / ATCC MYA-4617 / FGSC 8958) OX=242507 GN=MGCH7_ch7g45 PE=4 SV=1	Apoplastic effector	EffectorP 3.0
tr|G4NDA8|G4NDA8_MAGO7 Uncharacterized protein OS=Magnaporthe oryzae (strain 70-15 / ATCC MYA-4617 / FGSC 8958) OX=242507 GN=MGG_00269 PE=4 SV=1	Apoplastic effector	EffectorP 3.0
sp|A4QUA4|LCL2_MAGO7 Long chronological lifespan protein 2 OS=Magnaporthe oryzae (strain 70-15 / ATCC MYA-4617 / FGSC 8958) OX=242507 GN=LCL2 PE=3 SV=1	Cytoplasmic effector	EffectorP 3.0
sp|Q2KH28|NPIIA_MAGO7 Neutral protease 2 homolog MGG_10927 OS=Magnaporthe oryzae (strain 70-15 / ATCC MYA-4617 / FGSC 8958) OX=242507 GN=MGCH7_ch7g157 PE=3 SV=1	Apoplastic effector	EffectorP 3.0
tr|G4N1D5|G4N1D5_MAGO7 Uncharacterized protein OS=Magnaporthe oryzae (strain 70-15 / ATCC MYA-4617 / FGSC 8958) OX=242507 GN=MGG_09527 PE=4 SV=1	Apoplastic effector	EffectorP 3.0
tr|G4MMD6|G4MMD6_MAGO7 Uncharacterized protein OS=Magnaporthe oryzae (strain 70-15 / ATCC MYA-4617 / FGSC 8958) OX=242507 GN=MGG_01993 PE=4 SV=1	Apoplastic/cytoplasmic effector	EffectorP 3.0
tr|G4NAL5|G4NAL5_MAGO7 Uncharacterized protein OS=Magnaporthe oryzae (strain 70-15 / ATCC MYA-4617 / FGSC 8958) OX=242507 GN=MGG_13957 PE=4 SV=1	Apoplastic effector	EffectorP 3.0
tr|G4NFX3|G4NFX3_MAGO7 Uncharacterized protein OS=Magnaporthe oryzae (strain 70-15 / ATCC MYA-4617 / FGSC 8958) OX=242507 GN=MGG_11072 PE=4 SV=1	Apoplastic/cytoplasmic effector	EffectorP 3.0
tr|G4MKU3|G4MKU3_MAGO7 Uncharacterized protein OS=Magnaporthe oryzae (strain 70-15 / ATCC MYA-4617 / FGSC 8958) OX=242507 GN=MGG_05351 PE=4 SV=1	Apoplastic effector	EffectorP 3.0
tr|G4N8W4|G4N8W4_MAGO7 Lipocln_cytosolic_FA-bd_dom domain-containing protein OS=Magnaporthe oryzae (strain 70-15 / ATCC MYA-4617 / FGSC 8958) OX=242507 GN=MGG_03369 PE=3 SV=1	Apoplastic effector	EffectorP 3.0
tr|G4N7D9|G4N7D9_MAGO7 Uncharacterized protein OS=Magnaporthe oryzae (strain 70-15 / ATCC MYA-4617 / FGSC 8958) OX=242507 GN=MGG_03593 PE=4 SV=1	Apoplastic effector	EffectorP 3.0
tr|G4MVY9|G4MVY9_MAGO7 Uncharacterized protein OS=Magnaporthe oryzae (strain 70-15 / ATCC MYA-4617 / FGSC 8958) OX=242507 GN=MGG_15924 PE=4 SV=1	Apoplastic/cytoplasmic effector	EffectorP 3.0
tr|G4N6L5|G4N6L5_MAGO7 Bys1 family protein OS=Magnaporthe oryzae (strain 70-15 / ATCC MYA-4617 / FGSC 8958) OX=242507 GN=MGG_06538 PE=4 SV=1	Apoplastic effector	EffectorP 3.0
tr|G4N4F9|G4N4F9_MAGO7 Uncharacterized protein OS=Magnaporthe oryzae (strain 70-15 / ATCC MYA-4617 / FGSC 8958) OX=242507 GN=MGG_12939 PE=4 SV=1	Apoplastic effector	EffectorP 3.0
tr|G4N0C3|G4N0C3_MAGO7 Coagulation factor 5/8 type domain-containing protein OS=Magnaporthe oryzae (strain 70-15 / ATCC MYA-4617 / FGSC 8958) OX=242507 GN=MGG_07390 PE=4 SV=1	Apoplastic effector	EffectorP 3.0
tr|G4N4A2|G4N4A2_MAGO7 Uncharacterized protein OS=Magnaporthe oryzae (strain 70-15 / ATCC MYA-4617 / FGSC 8958) OX=242507 GN=MGG_05943 PE=4 SV=1	Apoplastic effector	EffectorP 3.0
tr|G4N9B9|G4N9B9_MAGO7 Cystein rich protein OS=Magnaporthe oryzae (strain 70-15 / ATCC MYA-4617 / FGSC 8958) OX=242507 GN=MGG_10026 PE=4 SV=1	Apoplastic effector	EffectorP 3.0
tr|G4N2X8|G4N2X8_MAGO7 CFEM domain-containing protein OS=Magnaporthe oryzae (strain 70-15 / ATCC MYA-4617 / FGSC 8958) OX=242507 GN=MGG_15267 PE=4 SV=1	Apoplastic effector	EffectorP 3.0
tr|G4N8C6|G4N8C6_MAGO7 Acid phosphatase OS=Magnaporthe oryzae (strain 70-15 / ATCC MYA-4617 / FGSC 8958) OX=242507 GN=MGG_03439 PE=4 SV=1	Apoplastic effector	EffectorP 3.0
tr|G4MKE7|G4MKE7_MAGO7 Necrosis and ethylene inducing peptide OS=Magnaporthe oryzae (strain 70-15 / ATCC MYA-4617 / FGSC 8958) OX=242507 GN=MGG_10532 PE=4 SV=1	Apoplastic effector	EffectorP 3.0
tr|G4NL96|G4NL96_MAGO7 Uncharacterized protein OS=Magnaporthe oryzae (strain 70-15 / ATCC MYA-4617 / FGSC 8958) OX=242507 GN=MGG_09605 PE=4 SV=1	Cytoplasmic effector	EffectorP 3.0
tr|G4N9L8|G4N9L8_MAGO7 Fungal cellulose binding domain-containing protein OS=Magnaporthe oryzae (strain 70-15 / ATCC MYA-4617 / FGSC 8958) OX=242507 GN=MGG_13625 PE=4 SV=1	Apoplastic effector	EffectorP 3.0
tr|G4MMM4|G4MMM4_MAGO7 Uncharacterized protein OS=Magnaporthe oryzae (strain 70-15 / ATCC MYA-4617 / FGSC 8958) OX=242507 GN=MGG_05538 PE=4 SV=1	Apoplastic effector	EffectorP 3.0
tr|G5EH55|G5EH55_MAGO7 Uncharacterized protein OS=Magnaporthe oryzae (strain 70-15 / ATCC MYA-4617 / FGSC 8958) OX=242507 GN=MGCH7_ch7g5 PE=4 SV=1	Cytoplasmic effector	EffectorP 3.0
tr|G4MXC7|G4MXC7_MAGO7 Uncharacterized protein OS=Magnaporthe oryzae (strain 70-15 / ATCC MYA-4617 / FGSC 8958) OX=242507 GN=MGG_08254 PE=4 SV=1	Apoplastic effector	EffectorP 3.0
tr|G4MWC0|G4MWC0_MAGO7 Uncharacterized protein OS=Magnaporthe oryzae (strain 70-15 / ATCC MYA-4617 / FGSC 8958) OX=242507 GN=MGG_08373 PE=4 SV=1	Apoplastic effector	EffectorP 3.0
tr|G4NJJ0|G4NJJ0_MAGO7 Uncharacterized protein OS=Magnaporthe oryzae (strain 70-15 / ATCC MYA-4617 / FGSC 8958) OX=242507 GN=MGG_02638 PE=4 SV=1	Cytoplasmic effector	EffectorP 3.0
tr|G4N8U1|G4N8U1_MAGO7 Uncharacterized protein OS=Magnaporthe oryzae (strain 70-15 / ATCC MYA-4617 / FGSC 8958) OX=242507 GN=MGG_10105 PE=4 SV=1	Apoplastic effector	EffectorP 3.0
tr|G5EH68|G5EH68_MAGO7 Uncharacterized protein OS=Magnaporthe oryzae (strain 70-15 / ATCC MYA-4617 / FGSC 8958) OX=242507 GN=MGCH7_ch7g138 PE=4 SV=1	Apoplastic effector	EffectorP 3.0
tr|L7IQ60|L7IQ60_MAGOP Glycoside hydrolase OS=Magnaporthe oryzae (strain P131) OX=1143193 GN=OOW_P131scaffold01697g13 PE=4 SV=1	Apoplastic effector	EffectorP 3.0
tr|G4NET4|G4NET4_MAGO7 Uncharacterized protein OS=Magnaporthe oryzae (strain 70-15 / ATCC MYA-4617 / FGSC 8958) OX=242507 GN=MGG_00052 PE=4 SV=1	Unknown	amino acid length ≤300 and cysteine number ≥ 4
tr|G4N9V8|G4N9V8_MAGO7 Aldose 1-epimerase OS=Magnaporthe oryzae (strain 70-15 / ATCC MYA-4617 / FGSC 8958) OX=242507 GN=MGG_03245 PE=4 SV=1	Unknown	amino acid length ≤300 and cysteine number ≥ 4
tr|G4N6A5|G4N6A5_MAGO7 Peptide hydrolase OS=Magnaporthe oryzae (strain 70-15 / ATCC MYA-4617 / FGSC 8958) OX=242507 GN=MGG_06587 PE=3 SV=1	Unknown	amino acid length ≤300 and cysteine number ≥ 4
tr|G4N375|G4N375_MAGO7 Uncharacterized protein OS=Magnaporthe oryzae (strain 70-15 / ATCC MYA-4617 / FGSC 8958) OX=242507 GN=MGG_04944 PE=4 SV=1	Unknown	amino acid length ≤300 and cysteine number ≥ 4
tr|G4NIE7|G4NIE7_MAGO7 Beta-glucanase OS=Magnaporthe oryzae (strain 70-15 / ATCC MYA-4617 / FGSC 8958) OX=242507 GN=MGG_09861 PE=4 SV=1	Unknown	amino acid length ≤300 and cysteine number ≥ 4
tr|G4N3J0|G4N3J0_MAGO7 Carbonate dehydratase OS=Magnaporthe oryzae (strain 70-15 / ATCC MYA-4617 / FGSC 8958) OX=242507 GN=MGG_04973 PE=4 SV=1	Unknown	amino acid length ≤300 and cysteine number ≥ 4
tr|G4NG01|G4NG01_MAGO7 Uncharacterized protein OS=Magnaporthe oryzae (strain 70-15 / ATCC MYA-4617 / FGSC 8958) OX=242507 GN=MGG_01944 PE=4 SV=1	Unknown	amino acid length ≤300 and cysteine number ≥ 4
tr|G4N2D1|G4N2D1_MAGO7 AltA1 domain-containing protein OS=Magnaporthe oryzae (strain 70-15 / ATCC MYA-4617 / FGSC 8958) OX=242507 GN=MGG_07901 PE=4 SV=1	Unknown	amino acid length ≤300 and cysteine number ≥ 4
tr|G5EH74|G5EH74_MAGO7 Uncharacterized protein OS=Magnaporthe oryzae (strain 70-15 / ATCC MYA-4617 / FGSC 8958) OX=242507 GN=MGCH7_ch7g505 PE=4 SV=1	Unknown	amino acid length ≤300 and cysteine number ≥ 4
tr|G4N9H6|G4N9H6_MAGO7 HRXXH domain-containing protein OS=Magnaporthe oryzae (strain 70-15 / ATCC MYA-4617 / FGSC 8958) OX=242507 GN=MGG_17123 PE=4 SV=1	Unknown	amino acid length ≤300 and cysteine number ≥ 4
tr|G4MXT6|G4MXT6_MAGO7 Uncharacterized protein OS=Magnaporthe oryzae (strain 70-15 / ATCC MYA-4617 / FGSC 8958) OX=242507 GN=MGG_08253 PE=4 SV=1	Unknown	amino acid length ≤300 and cysteine number ≥ 4
tr|G4NBY8|G4NBY8_MAGO7 CFEM domain-containing protein OS=Magnaporthe oryzae (strain 70-15 / ATCC MYA-4617 / FGSC 8958) OX=242507 GN=MGG_01149 PE=4 SV=1	Unknown	amino acid length ≤300 and cysteine number ≥ 4
tr|G4MPD5|G4MPD5_MAGO7 Malate dehydrogenase OS=Magnaporthe oryzae (strain 70-15 / ATCC MYA-4617 / FGSC 8958) OX=242507 GN=MGG_09188 PE=4 SV=1	Unknown	amino acid length ≤300 and cysteine number ≥ 4
sp|A4RGT4|MEP1_MAGO7 Extracellular metalloprotease MGG_08041 OS=Magnaporthe oryzae (strain 70-15 / ATCC MYA-4617 / FGSC 8958) OX=242507 GN=MGG_08041 PE=3 SV=1	Unknown	amino acid length ≤300 and cysteine number ≥ 4
tr|G4ND02|G4ND02_MAGO7 Uncharacterized protein OS=Magnaporthe oryzae (strain 70-15 / ATCC MYA-4617 / FGSC 8958) OX=242507 GN=MGG_00311 PE=4 SV=1	Unknown	amino acid length ≤300 and cysteine number ≥ 4
tr|G4MUG8|G4MUG8_MAGO7 Uncharacterized protein OS=Magnaporthe oryzae (strain 70-15 / ATCC MYA-4617 / FGSC 8958) OX=242507 GN=MGG_07246 PE=4 SV=1	Unknown	amino acid length ≤300 and cysteine number ≥ 4
tr|G4NHJ9|G4NHJ9_MAGO7 Metalloprotease 1 OS=Magnaporthe oryzae (strain 70-15 / ATCC MYA-4617 / FGSC 8958) OX=242507 GN=MGG_03817 PE=4 SV=1	Unknown	amino acid length ≤300 and cysteine number ≥ 4
tr|G4MUX9|G4MUX9_MAGO7 Uncharacterized protein OS=Magnaporthe oryzae (strain 70-15 / ATCC MYA-4617 / FGSC 8958) OX=242507 GN=MGG_07292 PE=4 SV=1	Unknown	amino acid length ≤300 and cysteine number ≥ 4
tr|G5EHD6|G5EHD6_MAGO7 Uncharacterized protein OS=Magnaporthe oryzae (strain 70-15 / ATCC MYA-4617 / FGSC 8958) OX=242507 GN=MGCH7_ch7g229 PE=4 SV=1	Unknown	amino acid length ≤300 and cysteine number ≥ 4
tr|G4N1T6|G4N1T6_MAGO7 Uncharacterized protein OS=Magnaporthe oryzae (strain 70-15 / ATCC MYA-4617 / FGSC 8958) OX=242507 GN=MGG_09488 PE=4 SV=1	Unknown	amino acid length ≤300 and cysteine number ≥ 4
tr|G4MW49|G4MW49_MAGO7 Uncharacterized protein OS=Magnaporthe oryzae (strain 70-15 / ATCC MYA-4617 / FGSC 8958) OX=242507 GN=MGG_08971 PE=4 SV=1	Unknown	amino acid length ≤300 and cysteine number ≥ 4
tr|G4N1G3|G4N1G3_MAGO7 Spherulin-1B OS=Magnaporthe oryzae (strain 70-15 / ATCC MYA-4617 / FGSC 8958) OX=242507 GN=MGG_07824 PE=4 SV=1	Unknown	amino acid length ≤300 and cysteine number ≥ 4
tr|G4NI03|G4NI03_MAGO7 Cutinase domain-containing protein OS=Magnaporthe oryzae (strain 70-15 / ATCC MYA-4617 / FGSC 8958) OX=242507 GN=MGG_12016 PE=4 SV=1	Unknown	amino acid length ≤300 and cysteine number ≥ 4
tr|G4NFK0|G4NFK0_MAGO7 AltA1 domain-containing protein OS=Magnaporthe oryzae (strain 70-15 / ATCC MYA-4617 / FGSC 8958) OX=242507 GN=MGG_08797 PE=4 SV=1	Unknown	amino acid length ≤300 and cysteine number ≥ 4
tr|G4N7U6|G4N7U6_MAGO7 Uncharacterized protein OS=Magnaporthe oryzae (strain 70-15 / ATCC MYA-4617 / FGSC 8958) OX=242507 GN=MGG_06359 PE=4 SV=1	Unknown	amino acid length ≤300 and cysteine number ≥ 4
